# Supplementary material for: Zn(OTf)2-catalyzed hydroamination of ynamides with aromatic amines
Source: Royal Society of Chemistry journal article supplement (doi:10.1039/d0ob02603d), 2021-01-01
Supplement: d0ob02603d1.pdf [file d0ob02603d1.pdf]

# Supporting Information

## Zn(OTf)<sub>2</sub>-Catalyzed Hydroamination of Ynamides with Aromatic Amines

Zhuo Chen <sup>a,b</sup>, Xiao-Di Nie<sup>b</sup>, Jian-Ting Sun <sup>b</sup>, Ai-Mei Yang, <sup>\*,a</sup> and Bang-Guo Wei<sup>\*,b</sup>

<sup>a</sup> College of Life Science and Engineering, Lanzhou University of Technology, Lanzhou 730050

<sup>b</sup> Department of Natural Medicine, School of Pharmacy, Fudan University, 826 Zhangheng Road, Shanghai 201203, China

Email: [aimeiyang@163.com](mailto:aimeiyang@163.com); [bgwei1974@fudan.edu.cn](mailto:bgwei1974@fudan.edu.cn)

### Table of Contents

|                                                                                             |        |
|---------------------------------------------------------------------------------------------|--------|
| I. X-Ray Structure for compound <b>3aa</b> .....                                            | S2-S4  |
| II. Copies of <sup>1</sup> H NMR, <sup>13</sup> C NMR and <sup>19</sup> F NMR Spectrum..... | S5-S81 |

## I. X-Ray Structure for compound 3 aa

ORTEP drawing of the X-ray crystallographic structure of 3aa

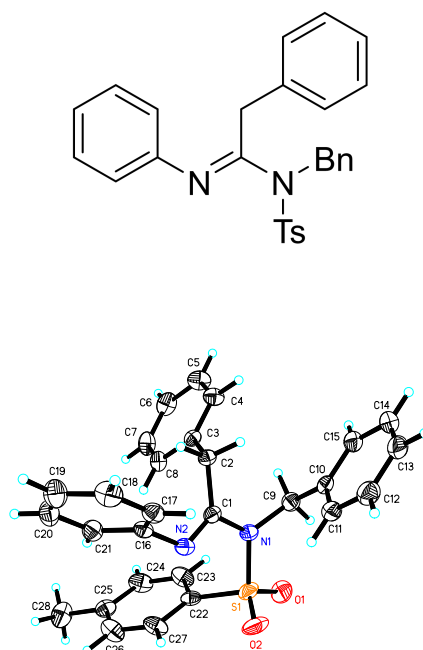

CCDC- 2052690. For detailed crystallographic data, please refer to the Cambridge Crystallographic Data Centre at <http://ccdc.cam.ac.uk>.

Table 1. Crystal data and structure refinement for **3aa**.

|                        |                                                                 |          |
|------------------------|-----------------------------------------------------------------|----------|
| Identification code    | <b>3aa</b>                                                      |          |
| Empirical formula      | C <sub>28</sub> H <sub>26</sub> N <sub>2</sub> O <sub>2</sub> S |          |
| Formula weight         | 454.57                                                          |          |
| Temperature            | 193(2) K                                                        |          |
| Wavelength             | 0.71073 Å                                                       |          |
| Crystal system         | Monoclinic                                                      |          |
| Space group            | P 2 <sub>1</sub> /n                                             |          |
| Unit cell dimensions   | a = 10.0012(8) Å                                                | α = 90°. |
| b = 22.074(2) Å        | β = 90.349(3)°.                                                 |          |
| c = 10.7284(10) Å      | γ = 90°.                                                        |          |
| Volume                 | 2368.4(4) Å <sup>3</sup>                                        |          |
| Z                      | 4                                                               |          |
| Density (calculated)   | 1.275 Mg/m <sup>3</sup>                                         |          |
| Absorption coefficient | 0.165 mm <sup>-1</sup>                                          |          |
| F(000)                 | 960                                                             |          |
| Crystal size           | 0.150 x 0.120 x 0.070 mm <sup>3</sup>                           |          |

|                                   |                                             |
|-----------------------------------|---------------------------------------------|
| Theta range for data collection   | 2.748 to 25.497°.                           |
| Index ranges                      | -10<=h<=12, -26<=k<=26, -12<=l<=12          |
| Reflections collected             | 22334                                       |
| Independent reflections           | 4391 [R(int) = 0.0700]                      |
| Completeness to theta = 25.242°   | 99.9 %                                      |
| Absorption correction             | Semi-empirical from equivalents             |
| Max. and min. transmission        | 0.7456 and 0.6366                           |
| Refinement method                 | Full-matrix least-squares on F <sup>2</sup> |
| Data / restraints / parameters    | 4391 / 0 / 299                              |
| Goodness-of-fit on F <sup>2</sup> | 1.118                                       |
| Final R indices [I>2sigma(I)]     | R1 = 0.0608, wR2 = 0.1143                   |
| R indices (all data)              | R1 = 0.0994, wR2 = 0.1316                   |
| Extinction coefficient            | n/a                                         |
| Largest diff. peak and hole       | 0.203 and -0.405 e.Å <sup>-3</sup>          |

Table 2. Atomic coordinates ( $\times 10^4$ ) and equivalent isotropic displacement parameters ( $\text{Å}^2 \times 10^3$ ) for mo\_dd20113\_0m. U(eq) is defined as one third of the trace of the orthogonalized  $U^{ij}$  tensor.

|       | x       | y       | z       | U(eq) |
|-------|---------|---------|---------|-------|
| S(1)  | 8100(1) | 7058(1) | 4279(1) | 51(1) |
| O(1)  | 7489(3) | 7597(1) | 4769(2) | 75(1) |
| O(2)  | 9393(2) | 6888(1) | 4727(2) | 69(1) |
| N(1)  | 6984(2) | 6508(1) | 4528(2) | 41(1) |
| N(2)  | 8289(2) | 5804(1) | 3514(2) | 41(1) |
| C(1)  | 7160(3) | 5931(1) | 3982(3) | 36(1) |
| C(2)  | 5928(3) | 5537(1) | 3962(3) | 34(1) |
| C(3)  | 4779(3) | 5804(1) | 3208(3) | 34(1) |
| C(4)  | 3478(3) | 5761(1) | 3637(3) | 46(1) |
| C(5)  | 2421(3) | 5975(2) | 2925(3) | 56(1) |
| C(6)  | 2666(3) | 6248(2) | 1797(3) | 57(1) |
| C(7)  | 3950(4) | 6308(2) | 1373(3) | 53(1) |
| C(8)  | 5003(3) | 6081(1) | 2069(3) | 44(1) |
| C(9)  | 5931(3) | 6607(1) | 5469(3) | 45(1) |
| C(10) | 6063(3) | 6215(1) | 6608(3) | 42(1) |
| C(11) | 7270(3) | 5974(1) | 7001(3) | 49(1) |
| C(12) | 7334(4) | 5626(2) | 8076(3) | 64(1) |
| C(13) | 6196(4) | 5511(2) | 8747(3) | 67(1) |

|       |         |         |          |       |
|-------|---------|---------|----------|-------|
| C(14) | 4997(4) | 5742(2) | 8368(3)  | 68(1) |
| C(15) | 4926(3) | 6094(2) | 7292(3)  | 55(1) |
| C(16) | 8494(3) | 5239(1) | 2933(3)  | 37(1) |
| C(17) | 8778(3) | 4729(1) | 3649(3)  | 45(1) |
| C(18) | 8981(3) | 4171(2) | 3075(4)  | 60(1) |
| C(19) | 8915(4) | 4123(2) | 1797(4)  | 70(1) |
| C(20) | 8689(3) | 4631(2) | 1088(3)  | 62(1) |
| C(21) | 8482(3) | 5189(2) | 1651(3)  | 49(1) |
| C(22) | 8149(3) | 7123(1) | 2654(3)  | 40(1) |
| C(23) | 7080(3) | 7395(2) | 2048(4)  | 59(1) |
| C(24) | 7116(3) | 7457(2) | 769(4)   | 61(1) |
| C(25) | 8175(3) | 7256(1) | 82(3)    | 49(1) |
| C(26) | 9226(3) | 6993(2) | 716(4)   | 60(1) |
| C(27) | 9223(3) | 6922(1) | 1991(3)  | 54(1) |
| C(28) | 8213(4) | 7340(2) | -1317(3) | 75(1) |

---



## II. Copies of $^1\text{H}$ NMR, $^{13}\text{C}$ NMR and $^{19}\text{F}$ NMR Spectrum

NMR spectra of compound 3aa

7.749  
7.728  
7.342  
7.220  
7.200  
7.141  
7.026  
6.995  
6.431  
6.412

4.656  
3.875  
2.454

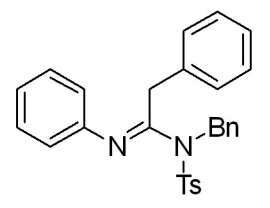

(<sup>1</sup>H NMR, 400 MHz, CDCl<sub>3</sub>)

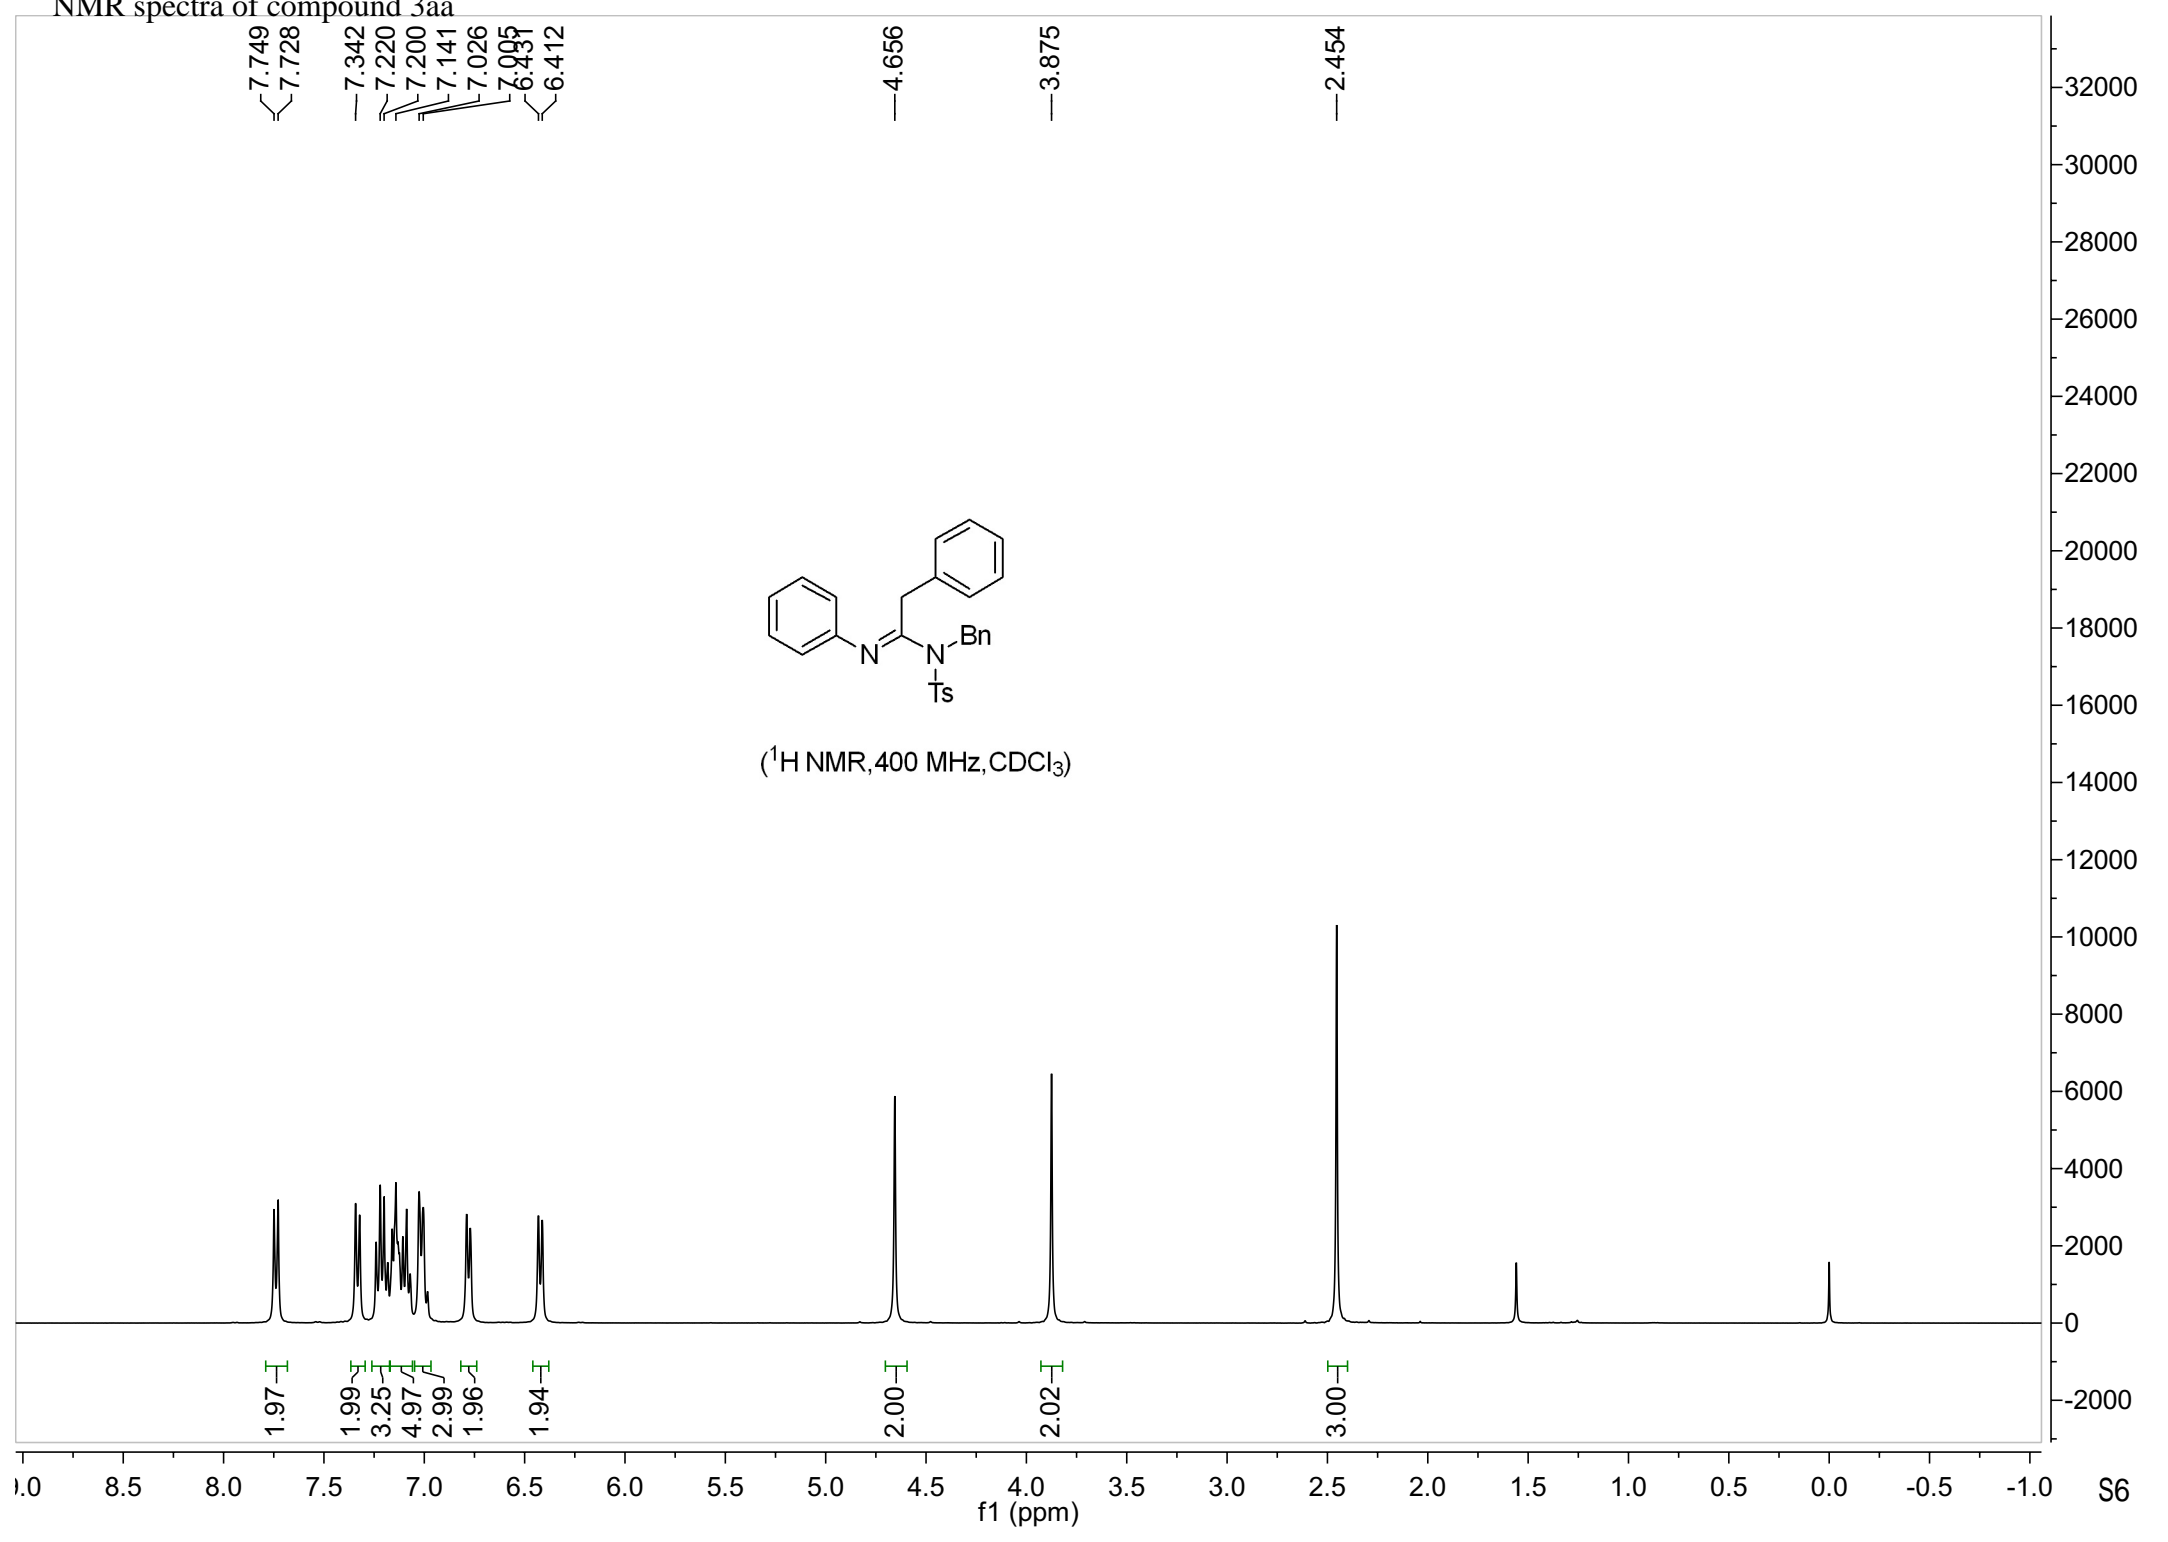

NMR spectra of compound 3ba

7.838  
7.818  
7.327  
7.307  
7.119  
7.046  
7.026  
6.782  
6.764  
6.330  
6.327  
6.311

4.621  
3.851  
3.750  
2.435

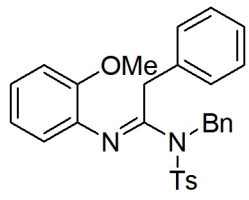

(<sup>1</sup>H NMR, 400 MHz, CDCl<sub>3</sub>)

1.98  
1.95  
4.32  
4.99  
3.97  
1.00

1.95  
2.04  
2.92  
3.00

8.5 8.0 7.5 7.0 6.5 6.0 5.5 5.0 4.5 4.0 3.5 3.0 2.5 2.0 1.5 1.0 0.5 0.0 -0.5 -1.0 S7

36000  
34000  
32000  
30000  
28000  
26000  
24000  
22000  
20000  
18000  
16000  
14000  
12000  
10000  
8000  
6000  
4000  
2000  
0  
-2000

NMR spectra of compound 3ba

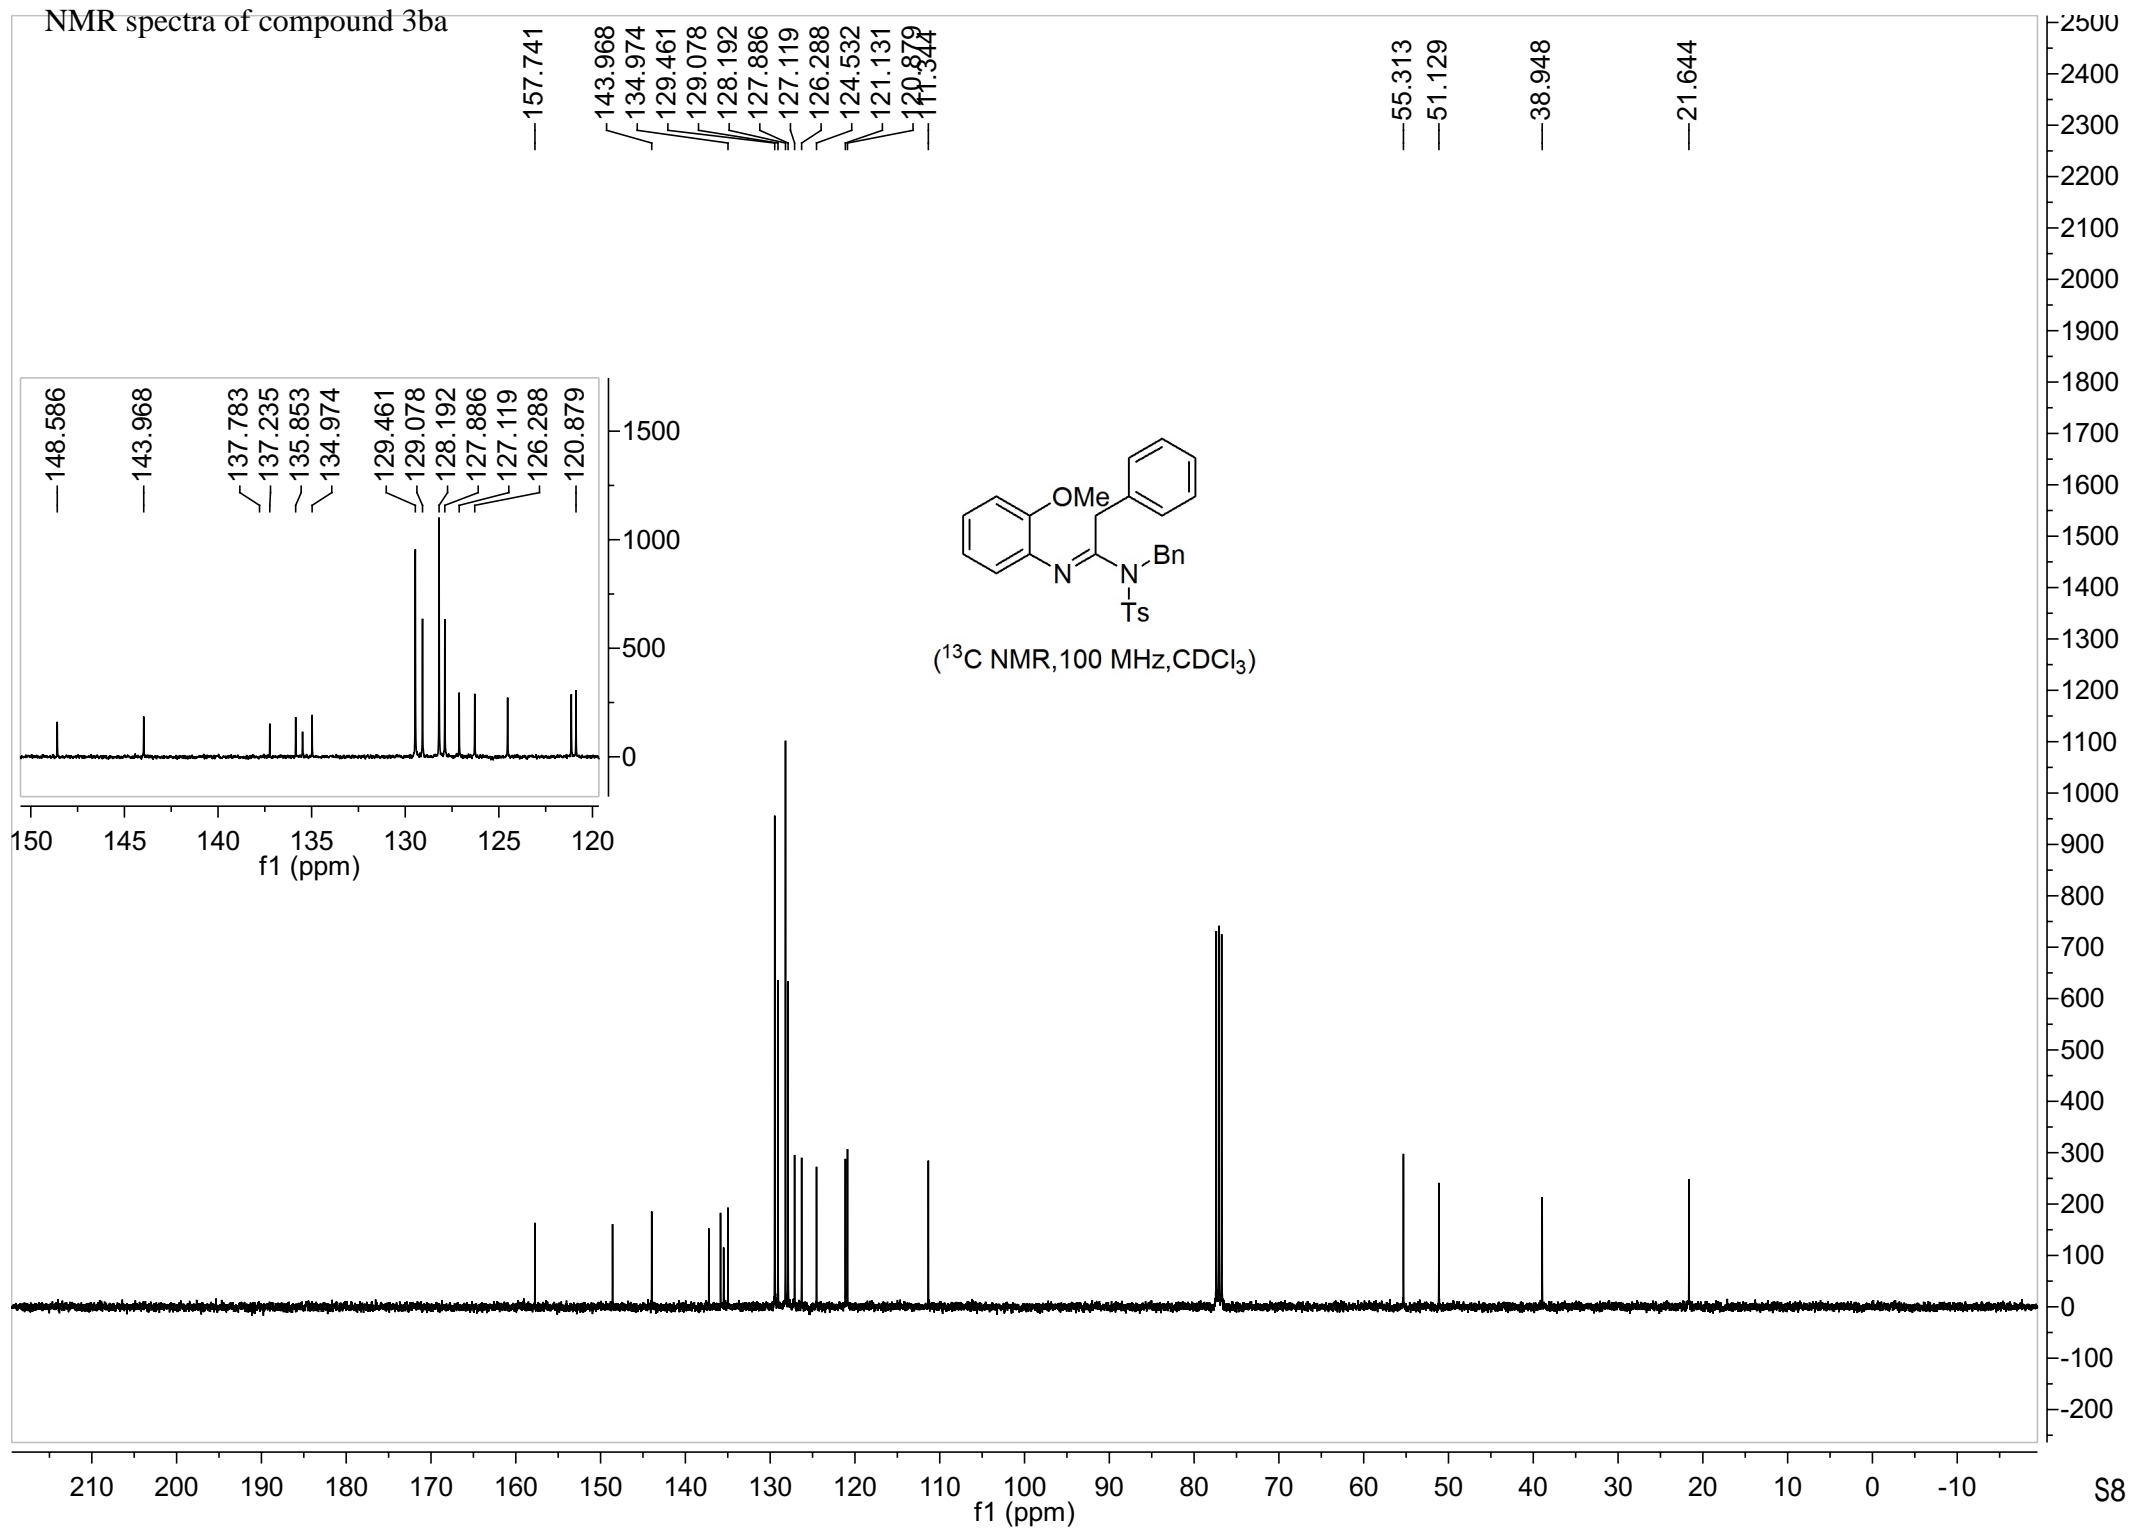

NMR spectra of compound 3ca

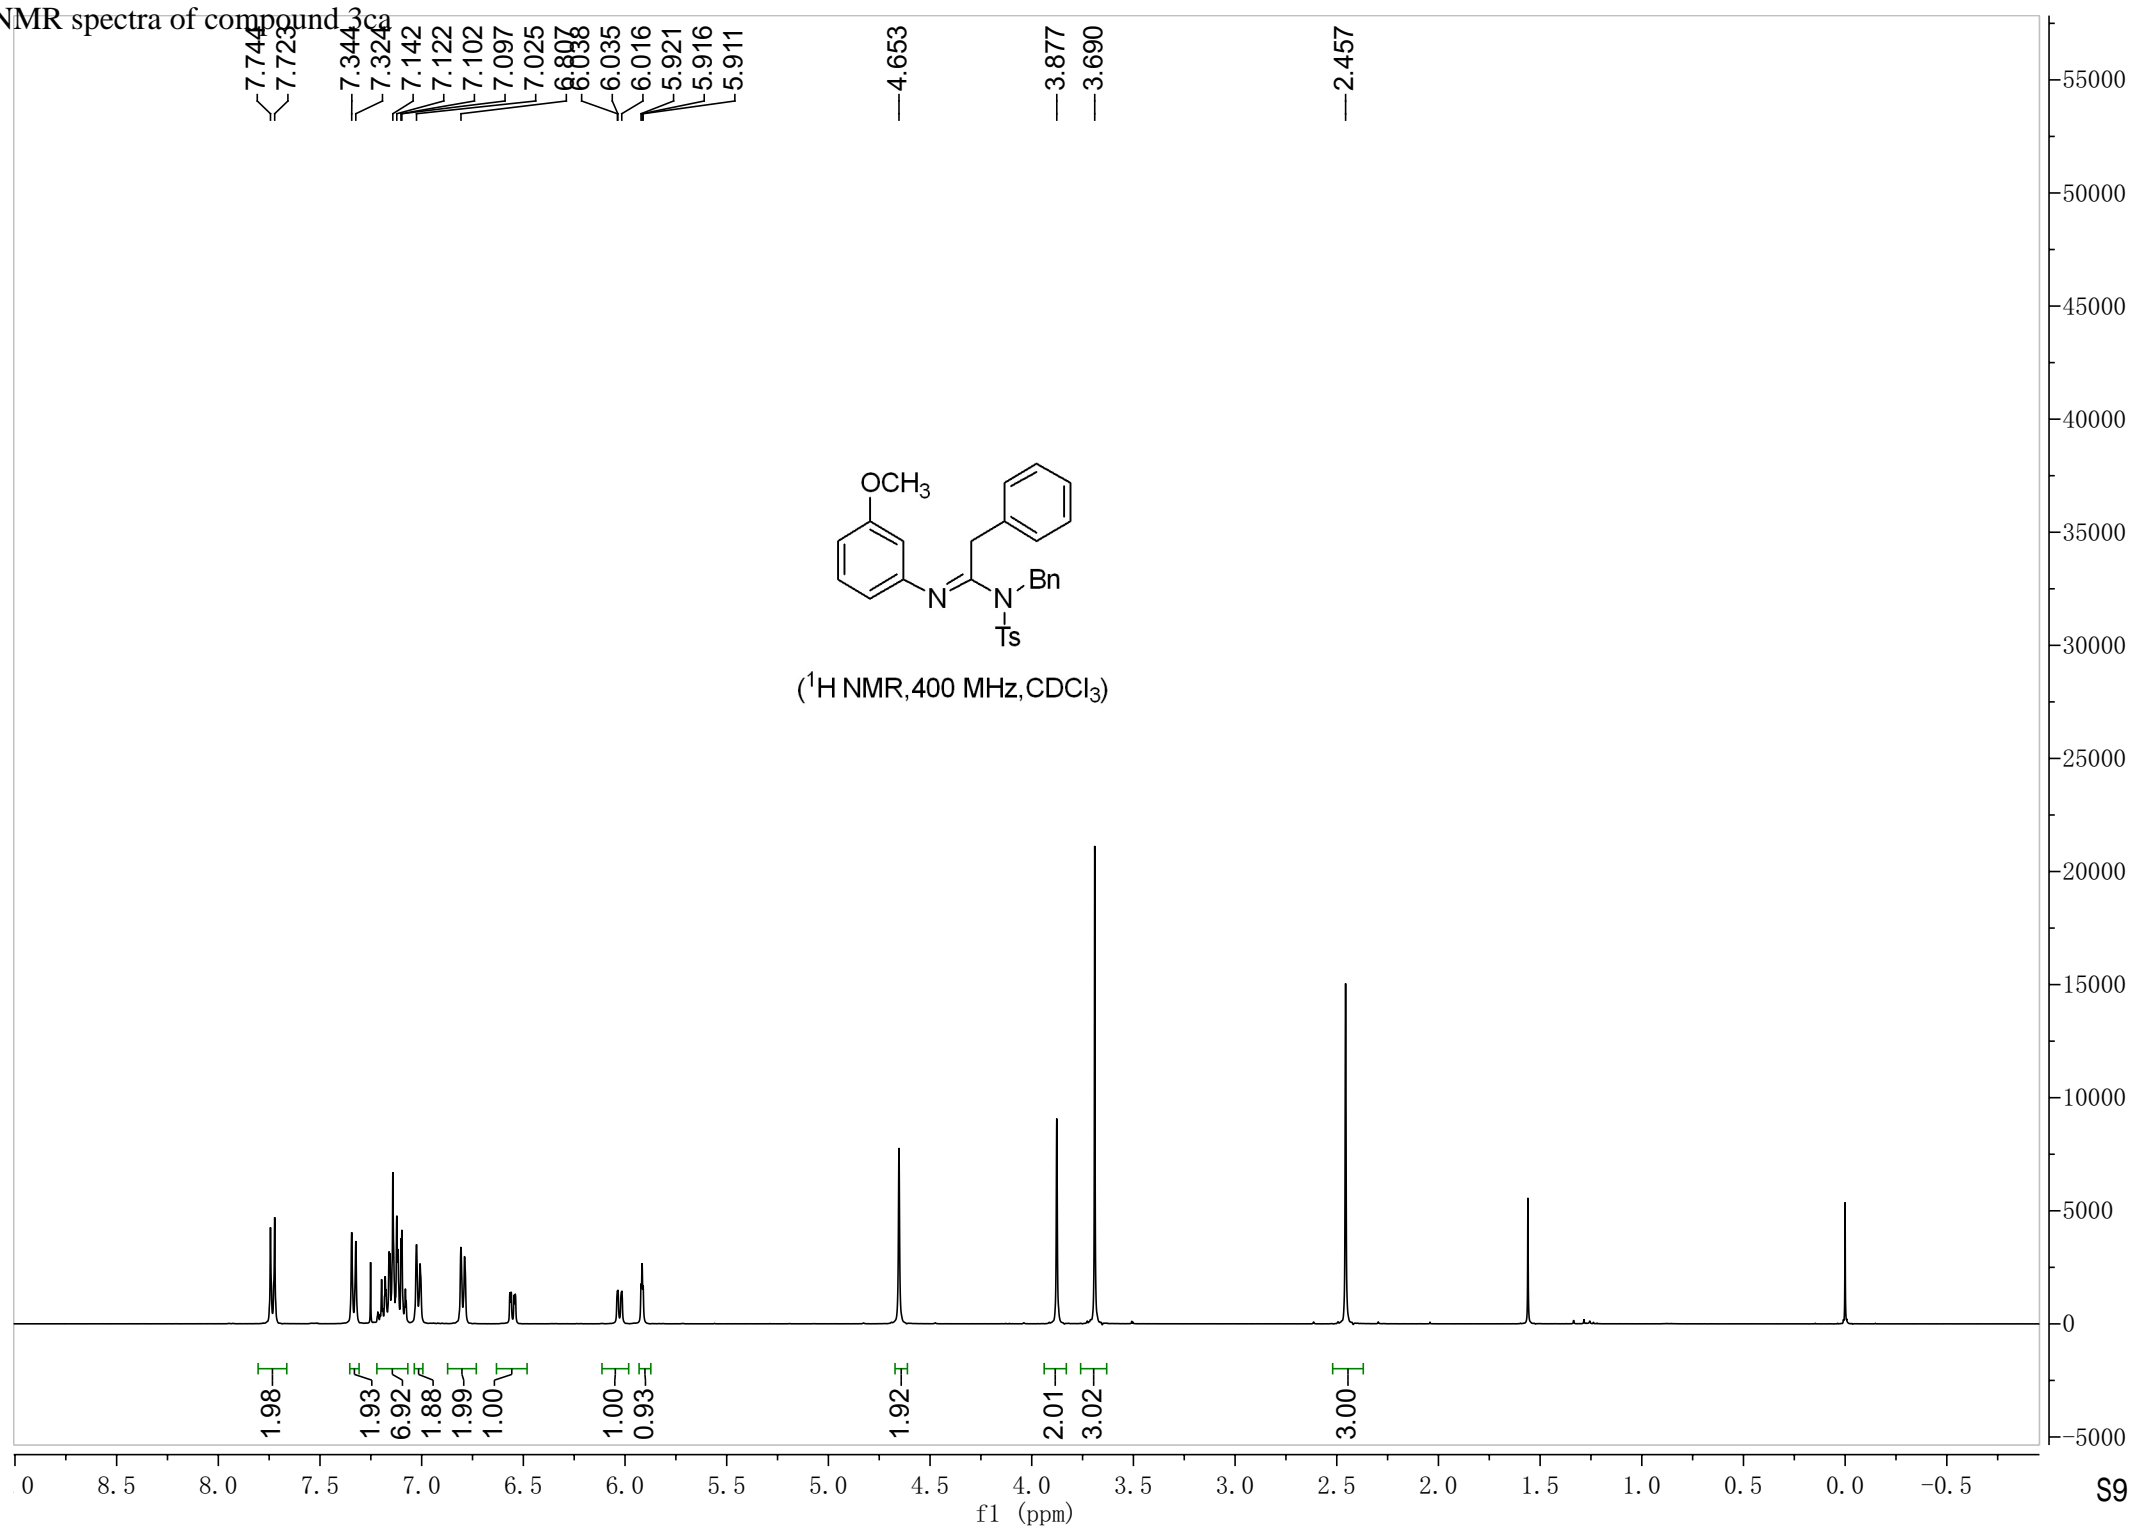

NMR spectra of compound 3ca

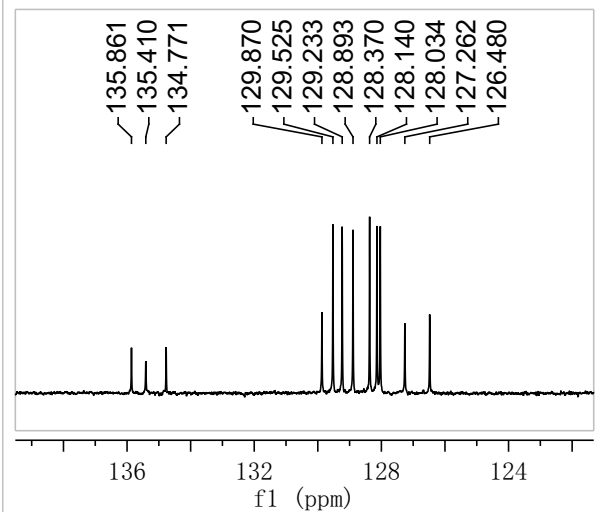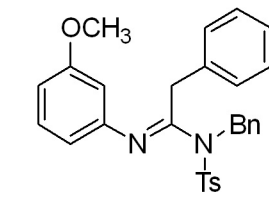

(<sup>13</sup>C NMR, 100 MHz, CDCl<sub>3</sub>)

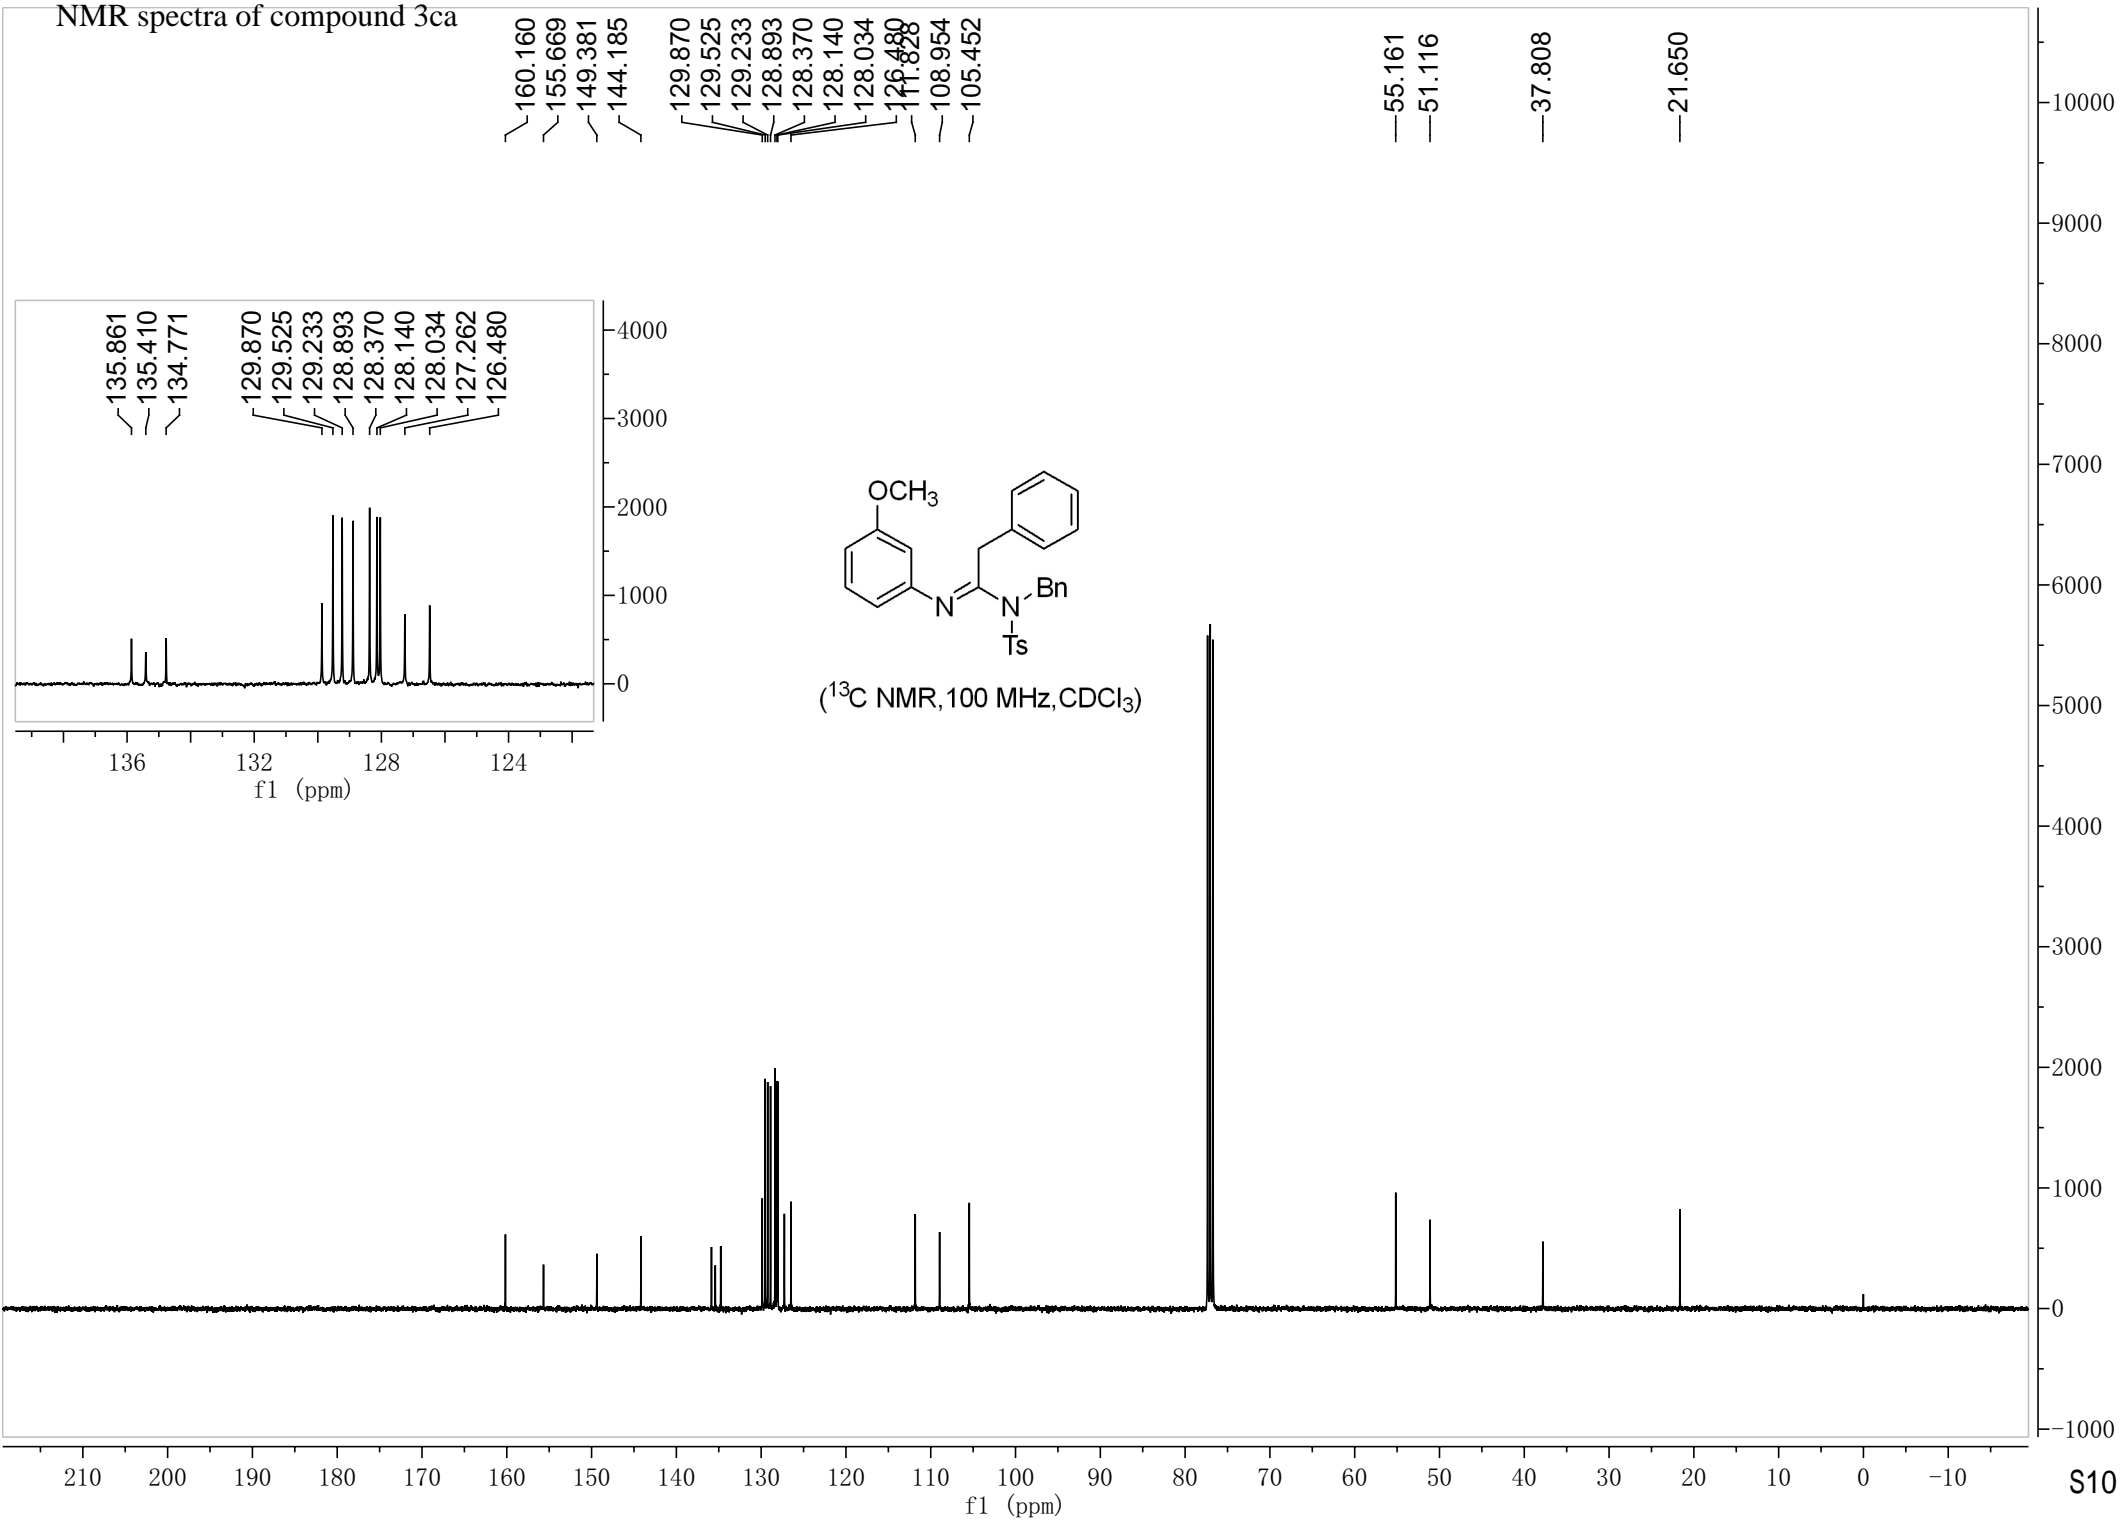

NMR spectra of compound 3da

7.741  
7.721  
7.337  
7.131  
7.083  
6.792  
6.776  
6.368  
6.368

4.647

3.901  
3.746

2.454

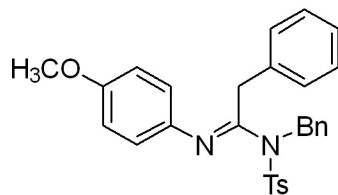

(<sup>1</sup>H NMR, 400 MHz, CDCl<sub>3</sub>)

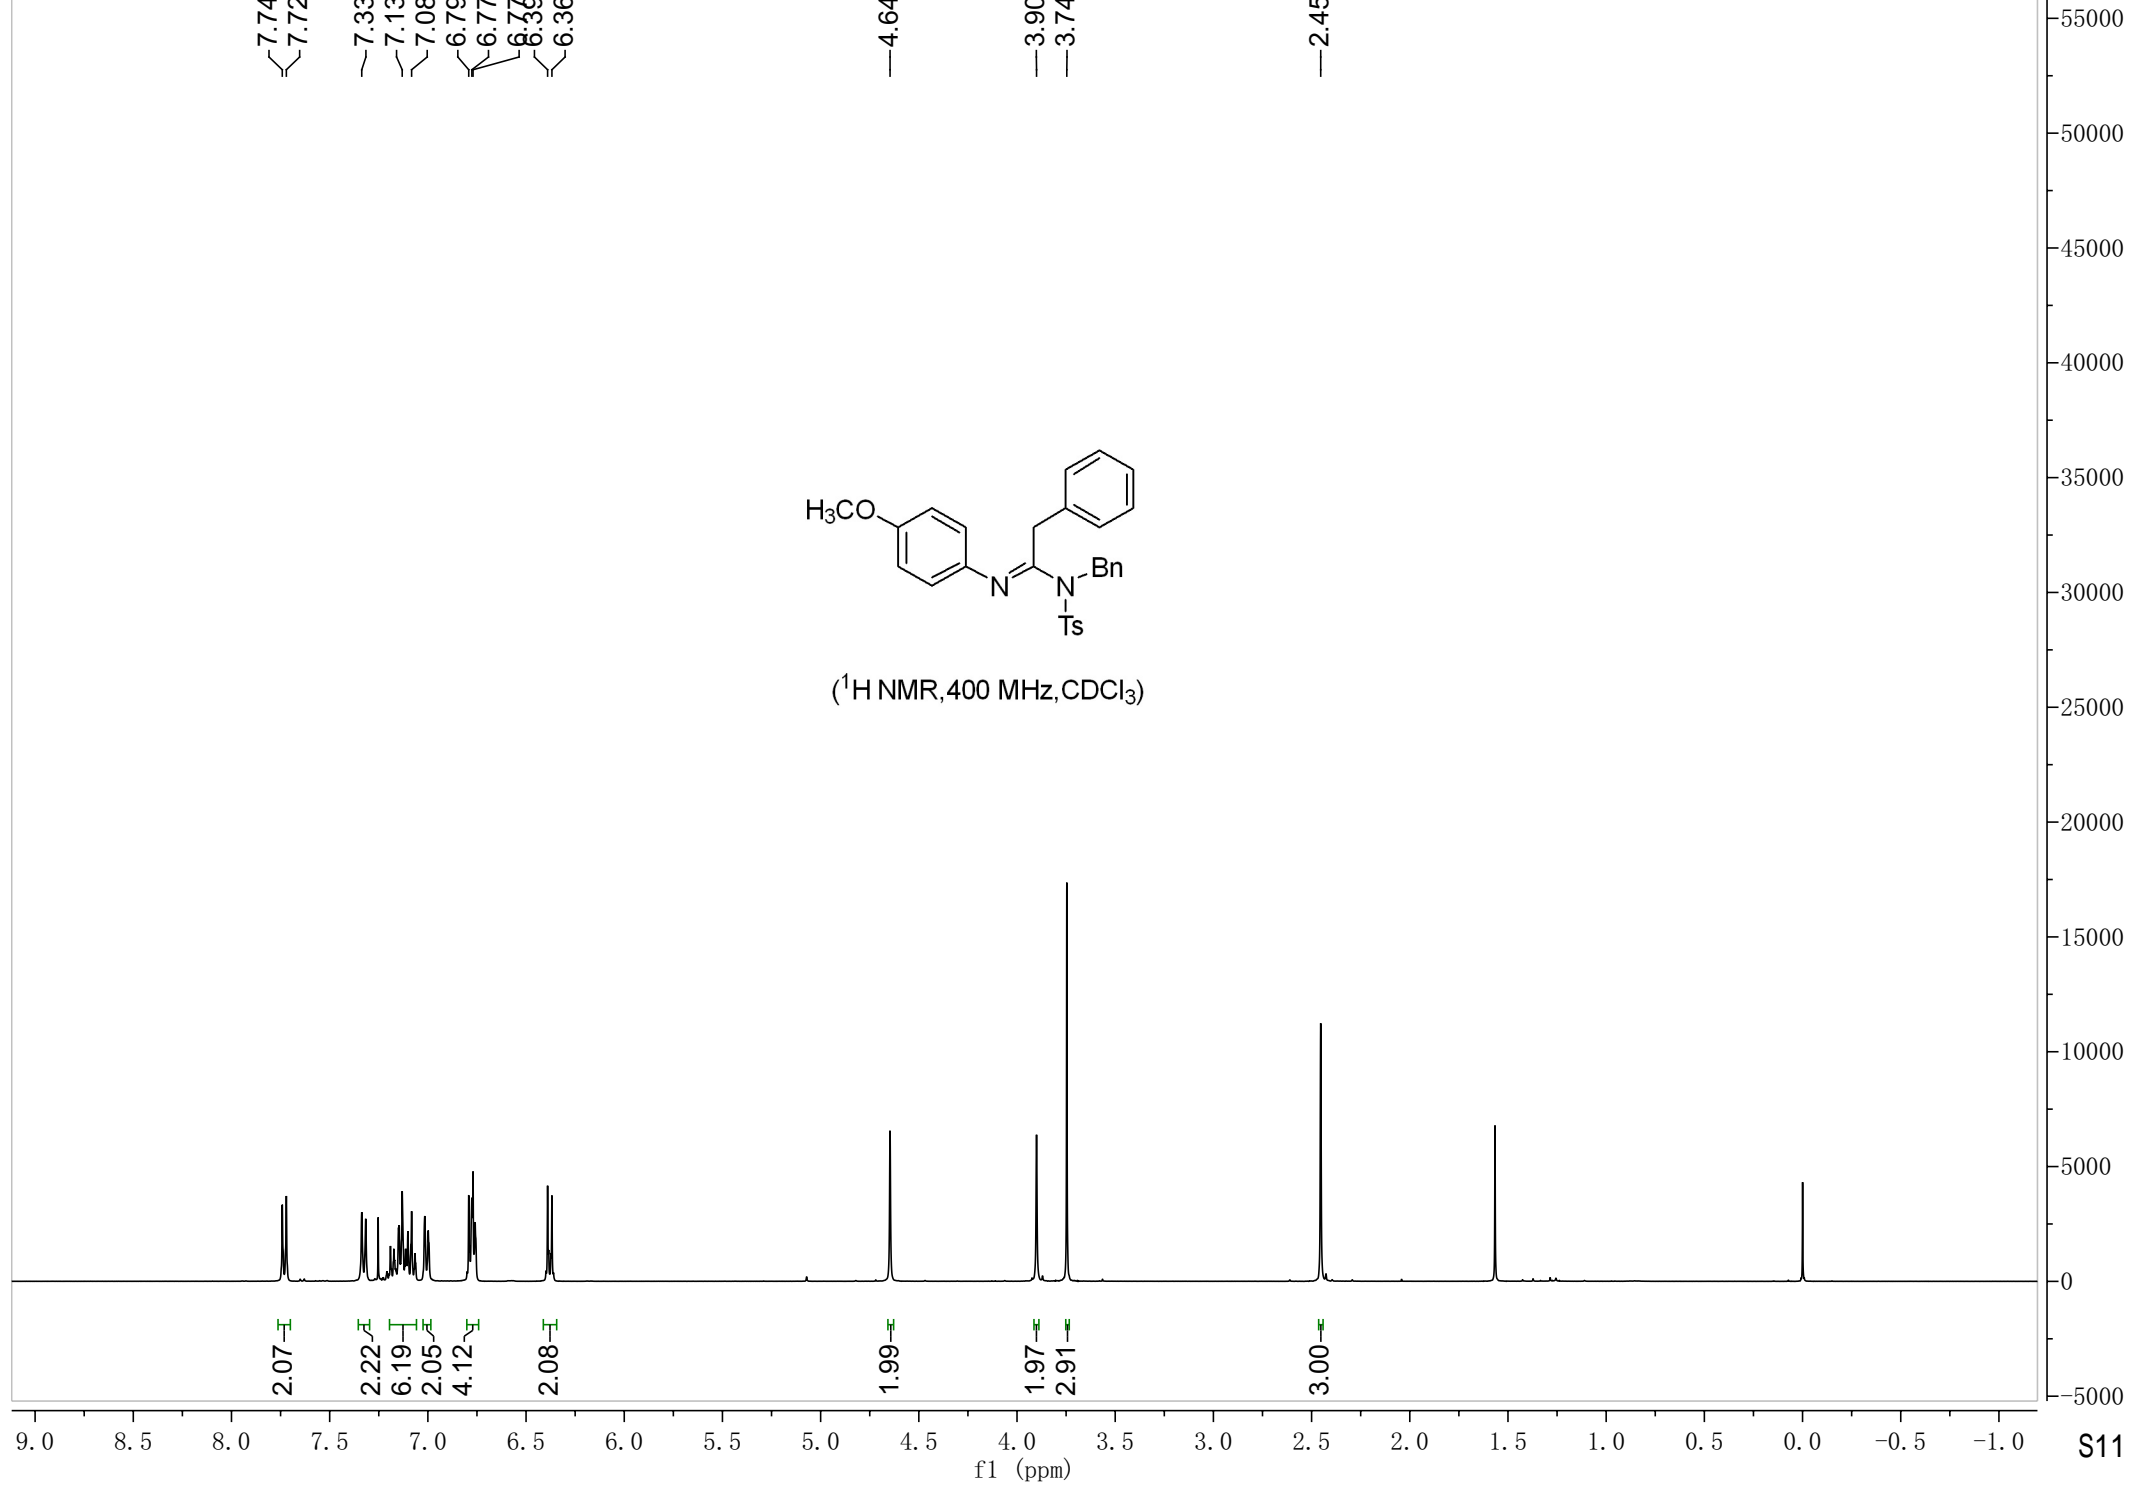

NMR spectra of compound 3da

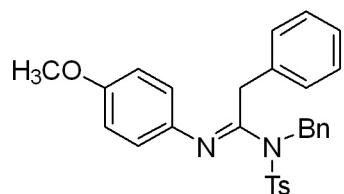

(<sup>13</sup>C NMR, 100 MHz, CDCl<sub>3</sub>)

156.131  
156.100  
144.114  
141.406  
135.892  
135.427  
134.853  
129.505  
129.172  
128.859  
128.374  
128.120  
128.021  
127.215  
126.434  
120.571  
114.373

55.481  
51.035

37.546

21.661

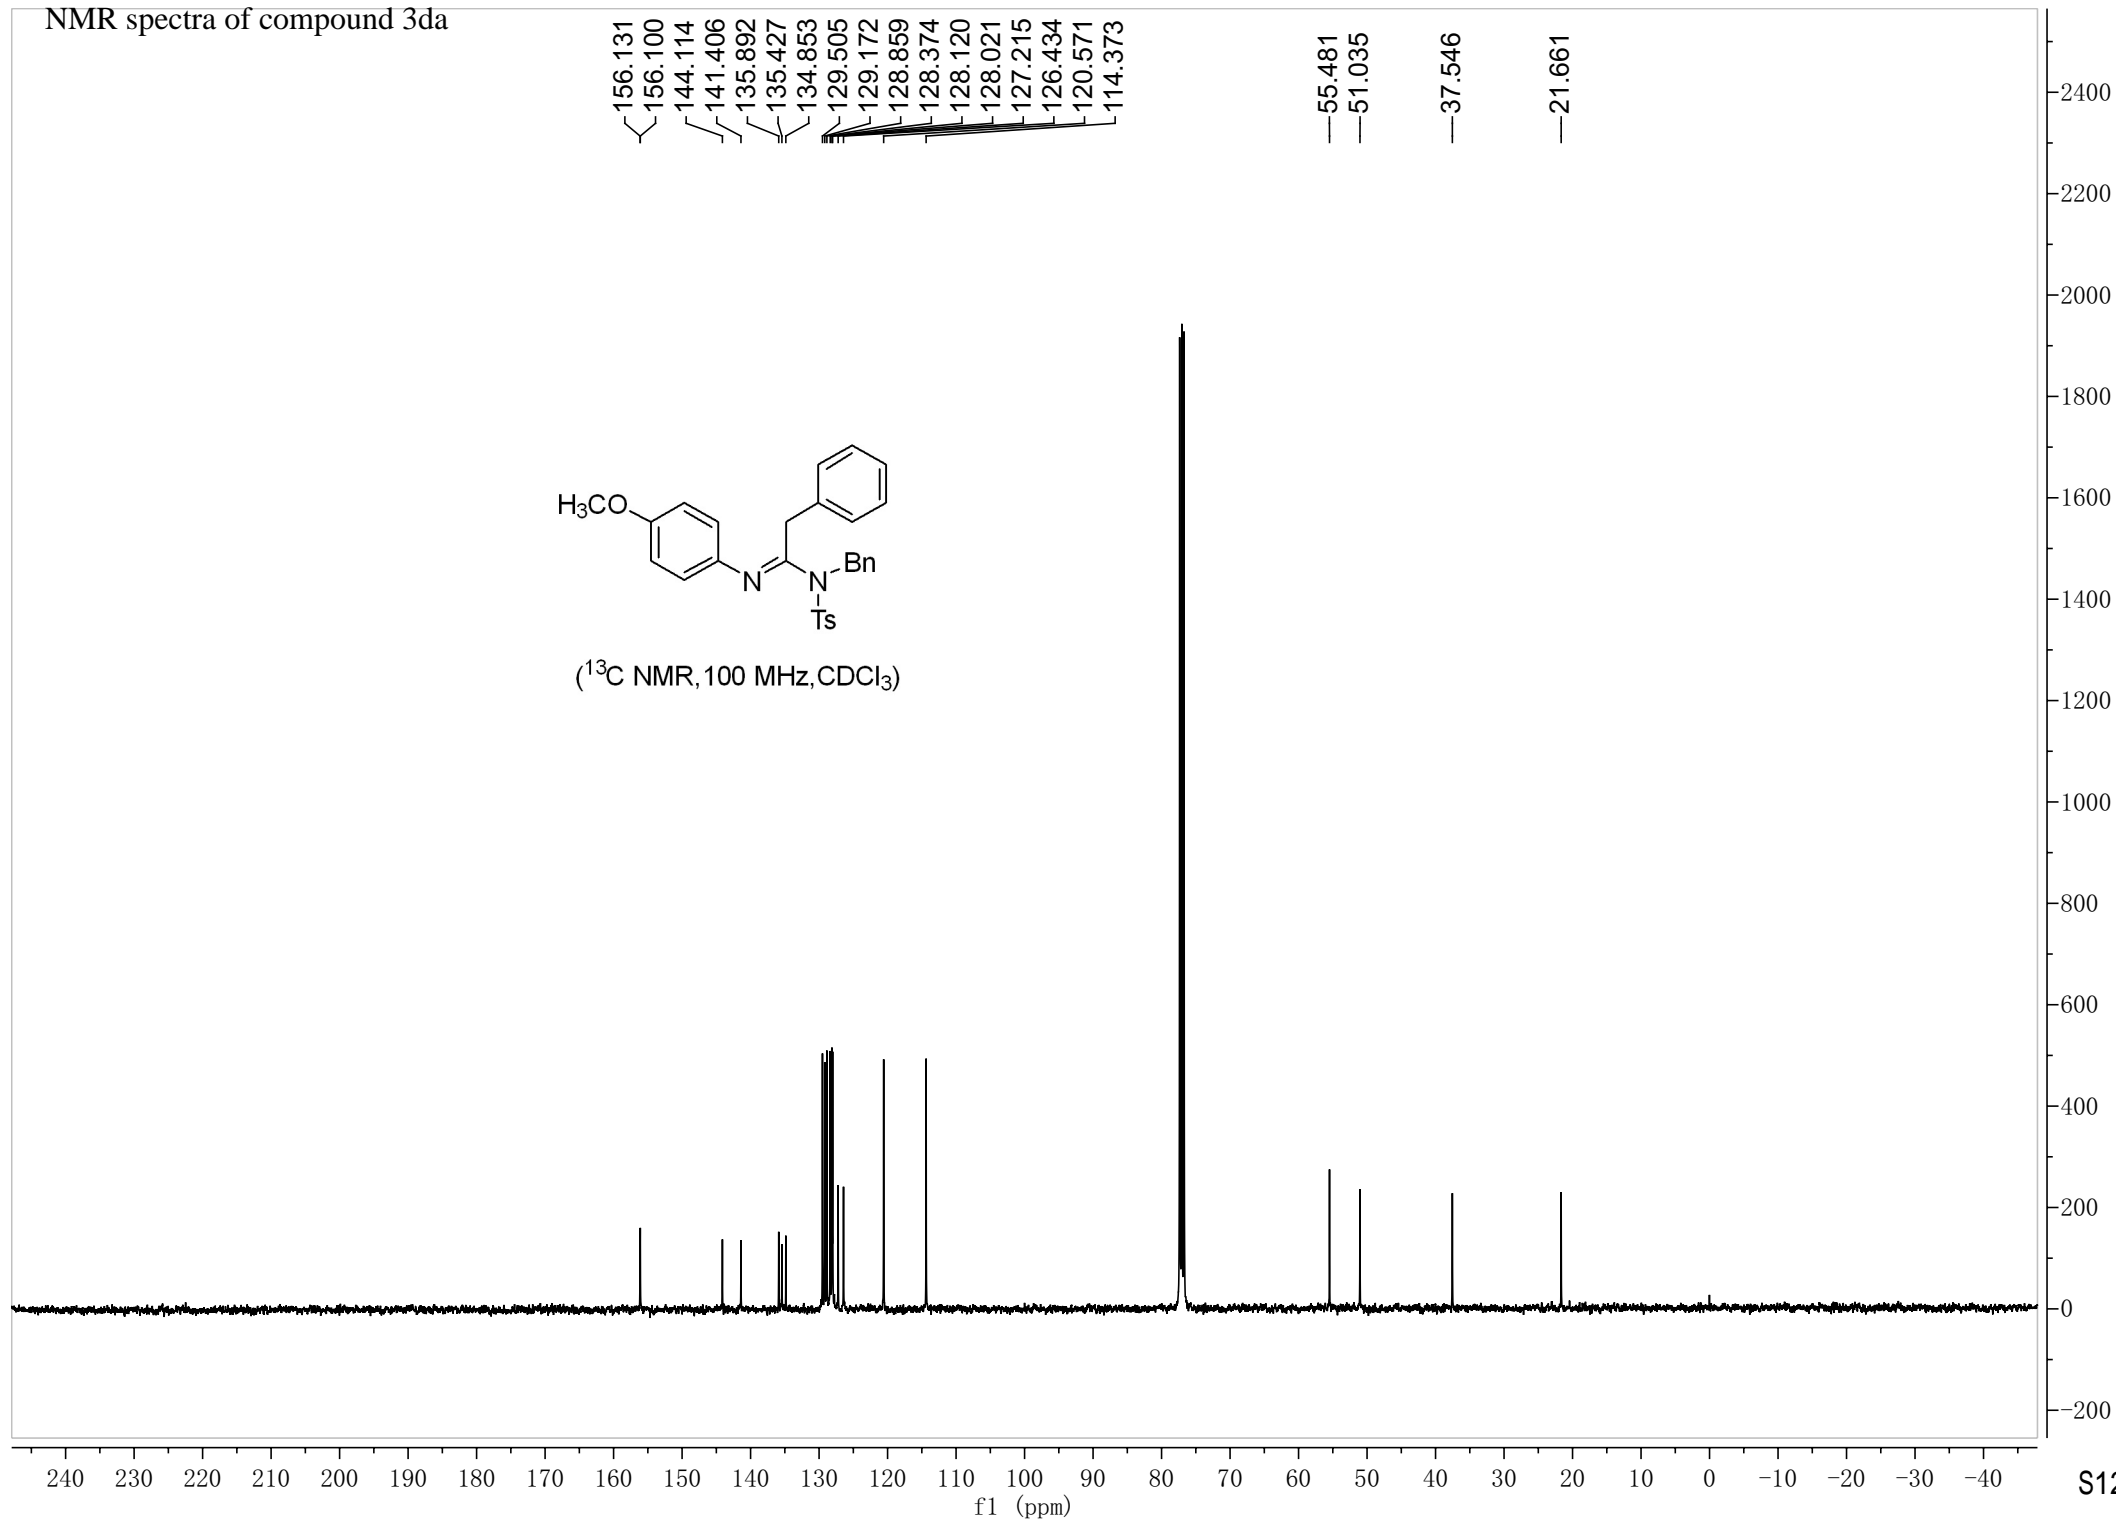



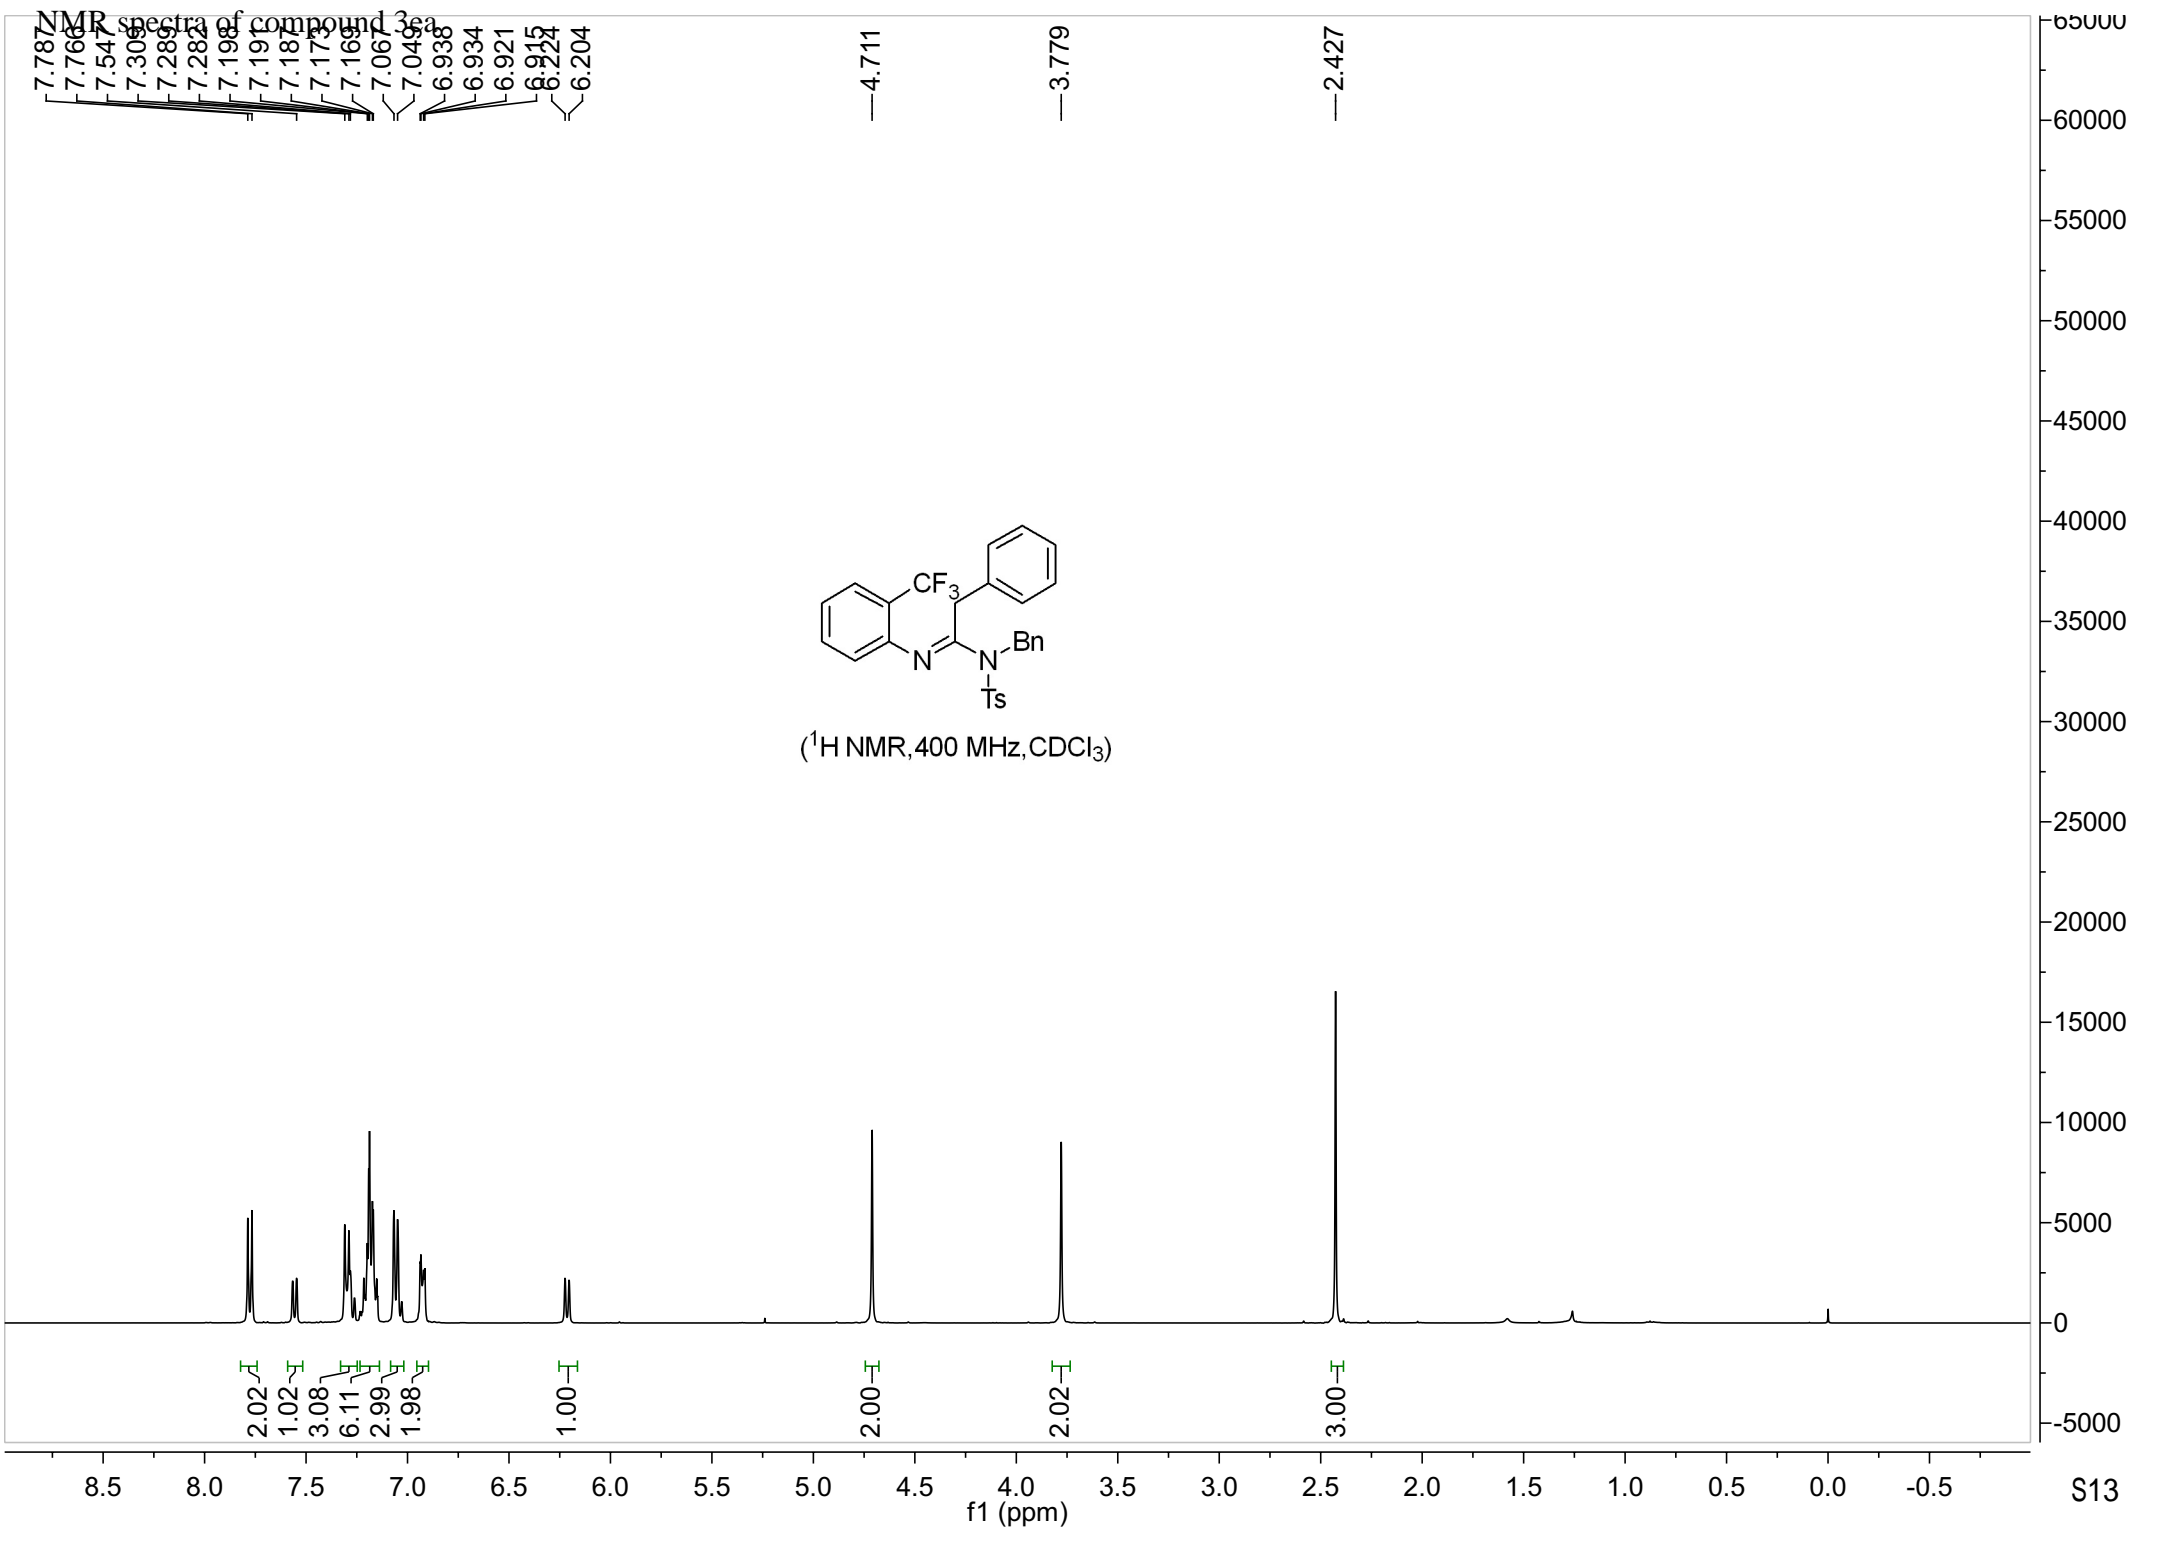

NMR spectra of compound 3ea

156.309  
 146.254  
 146.240  
 144.236  
 136.164  
 136.025  
 134.869  
 132.588  
 129.566  
 129.041  
 128.596  
 128.578  
 128.177  
 127.983  
 127.426  
 126.782  
 126.417  
 126.365  
 125.268  
 123.099  
 122.554  
 120.787  
 120.148  
 119.850  
 119.552  
 119.254  
 50.999  
 38.693  
 21.644

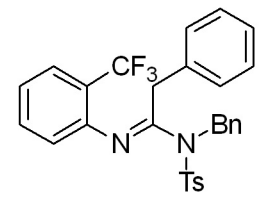

(<sup>13</sup>C NMR, 100 MHz, CDCl<sub>3</sub>)

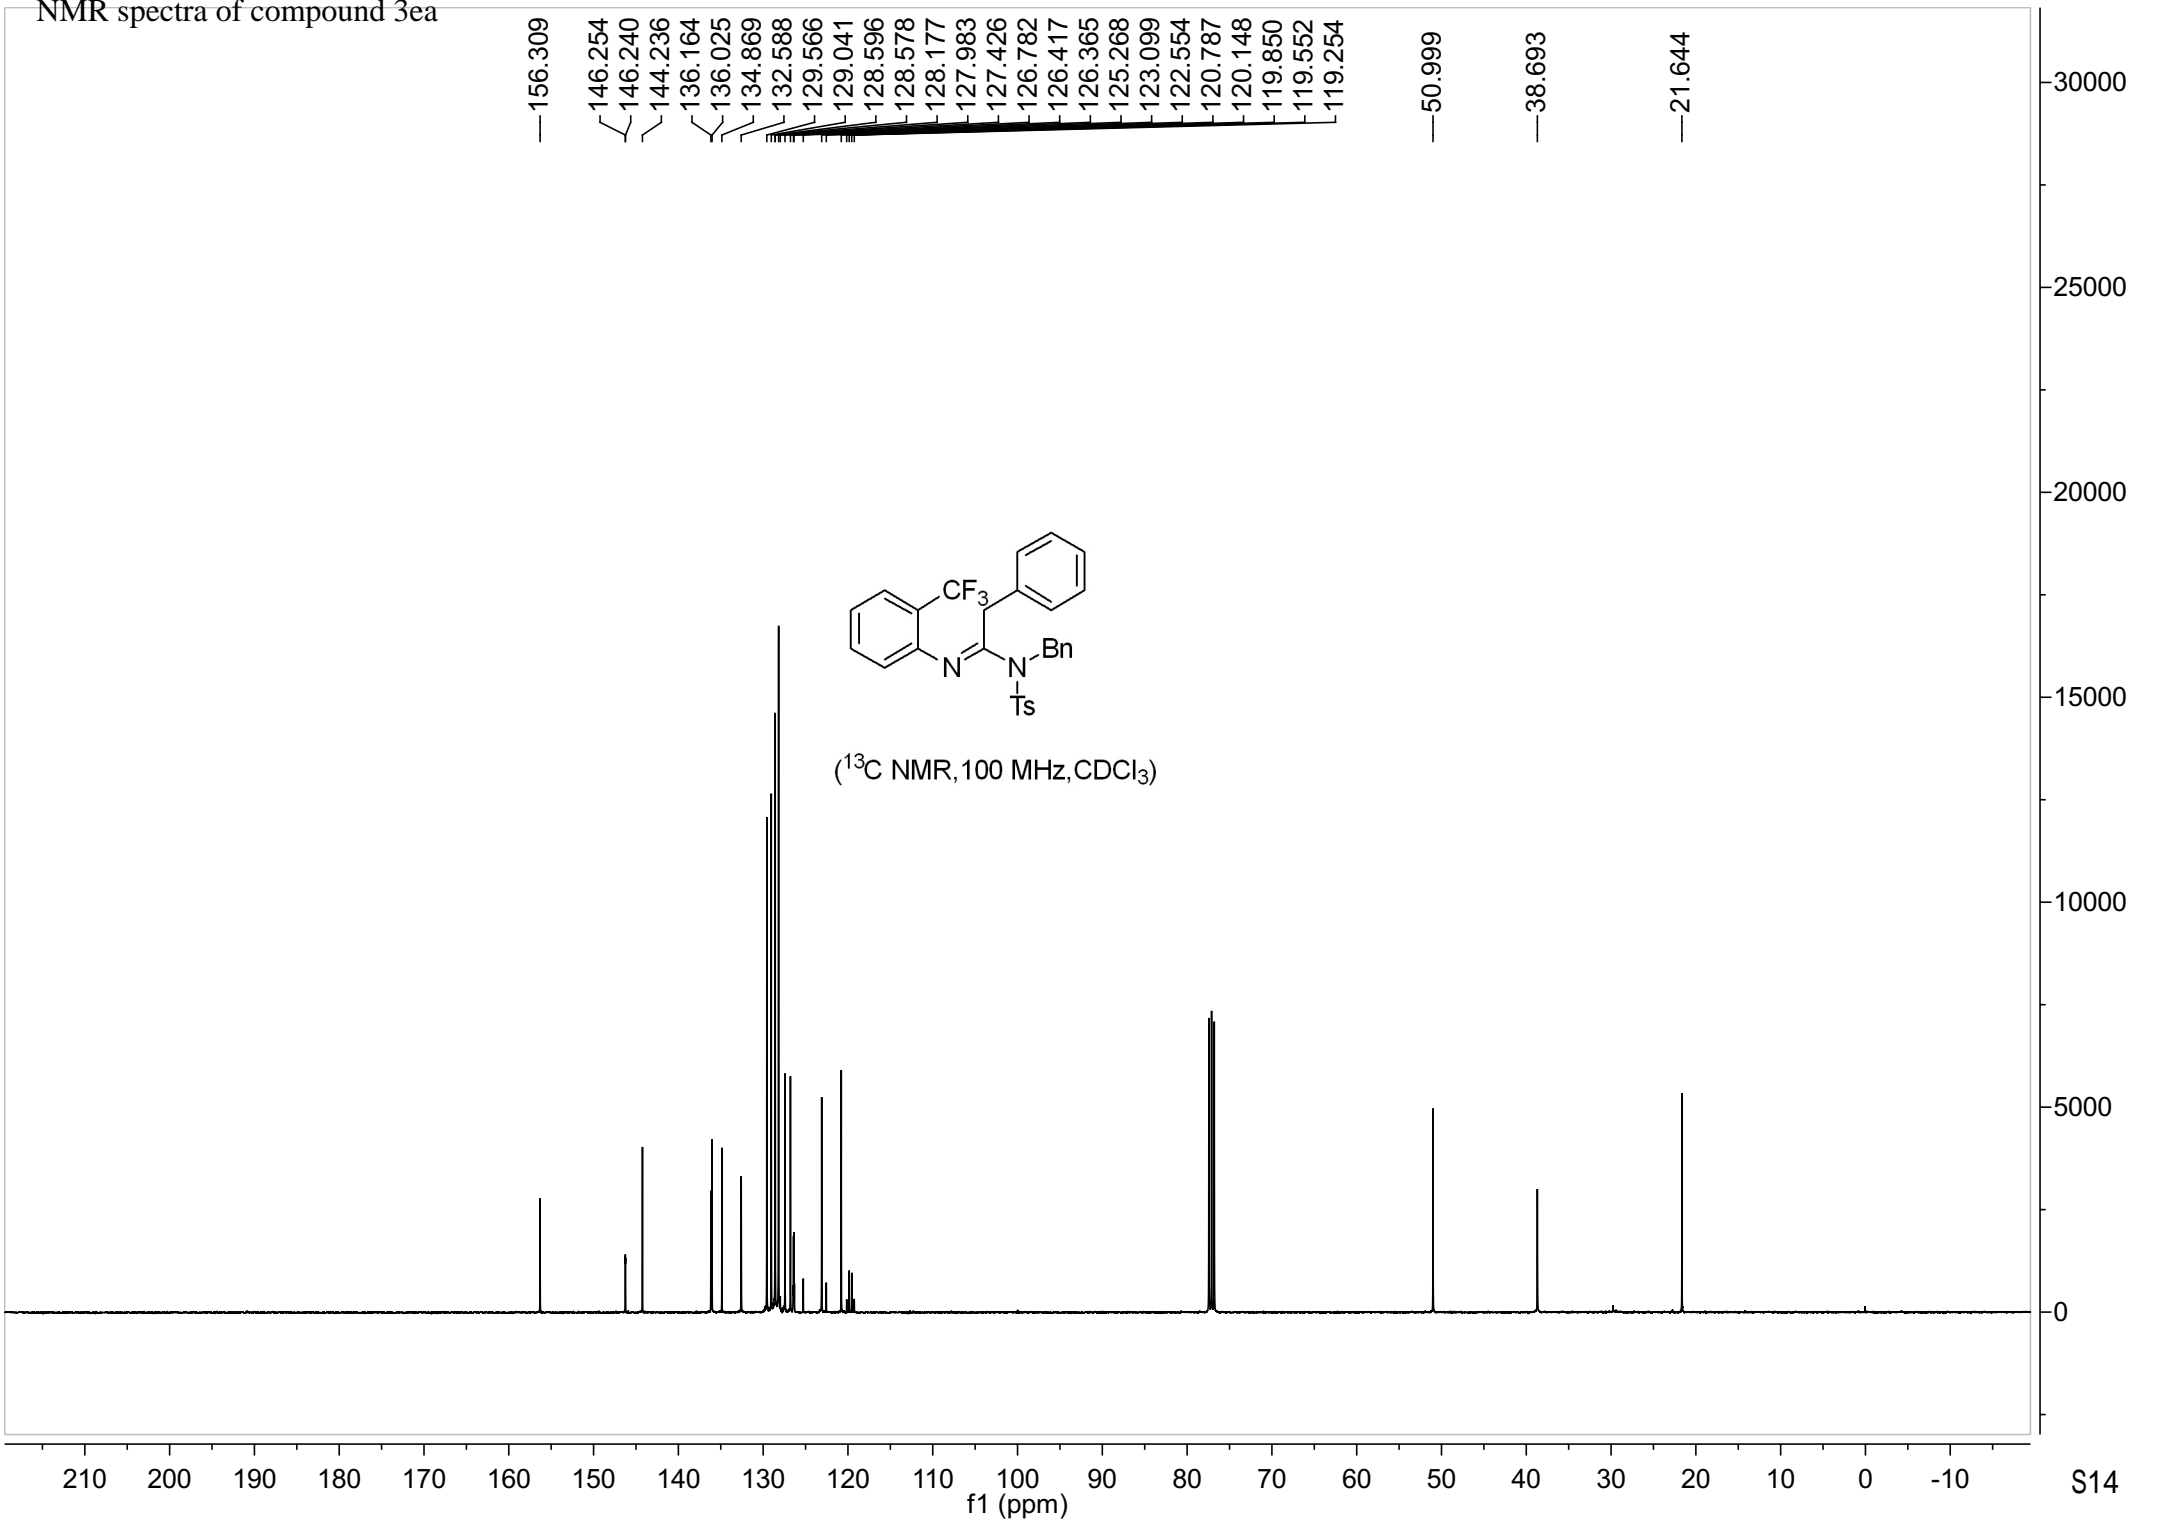

NMR spectra of compound 3ea

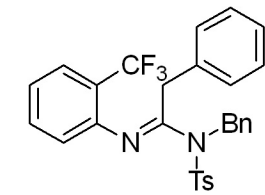

(<sup>19</sup>F NMR, 376 MHz, CDCl<sub>3</sub>)

--61.309

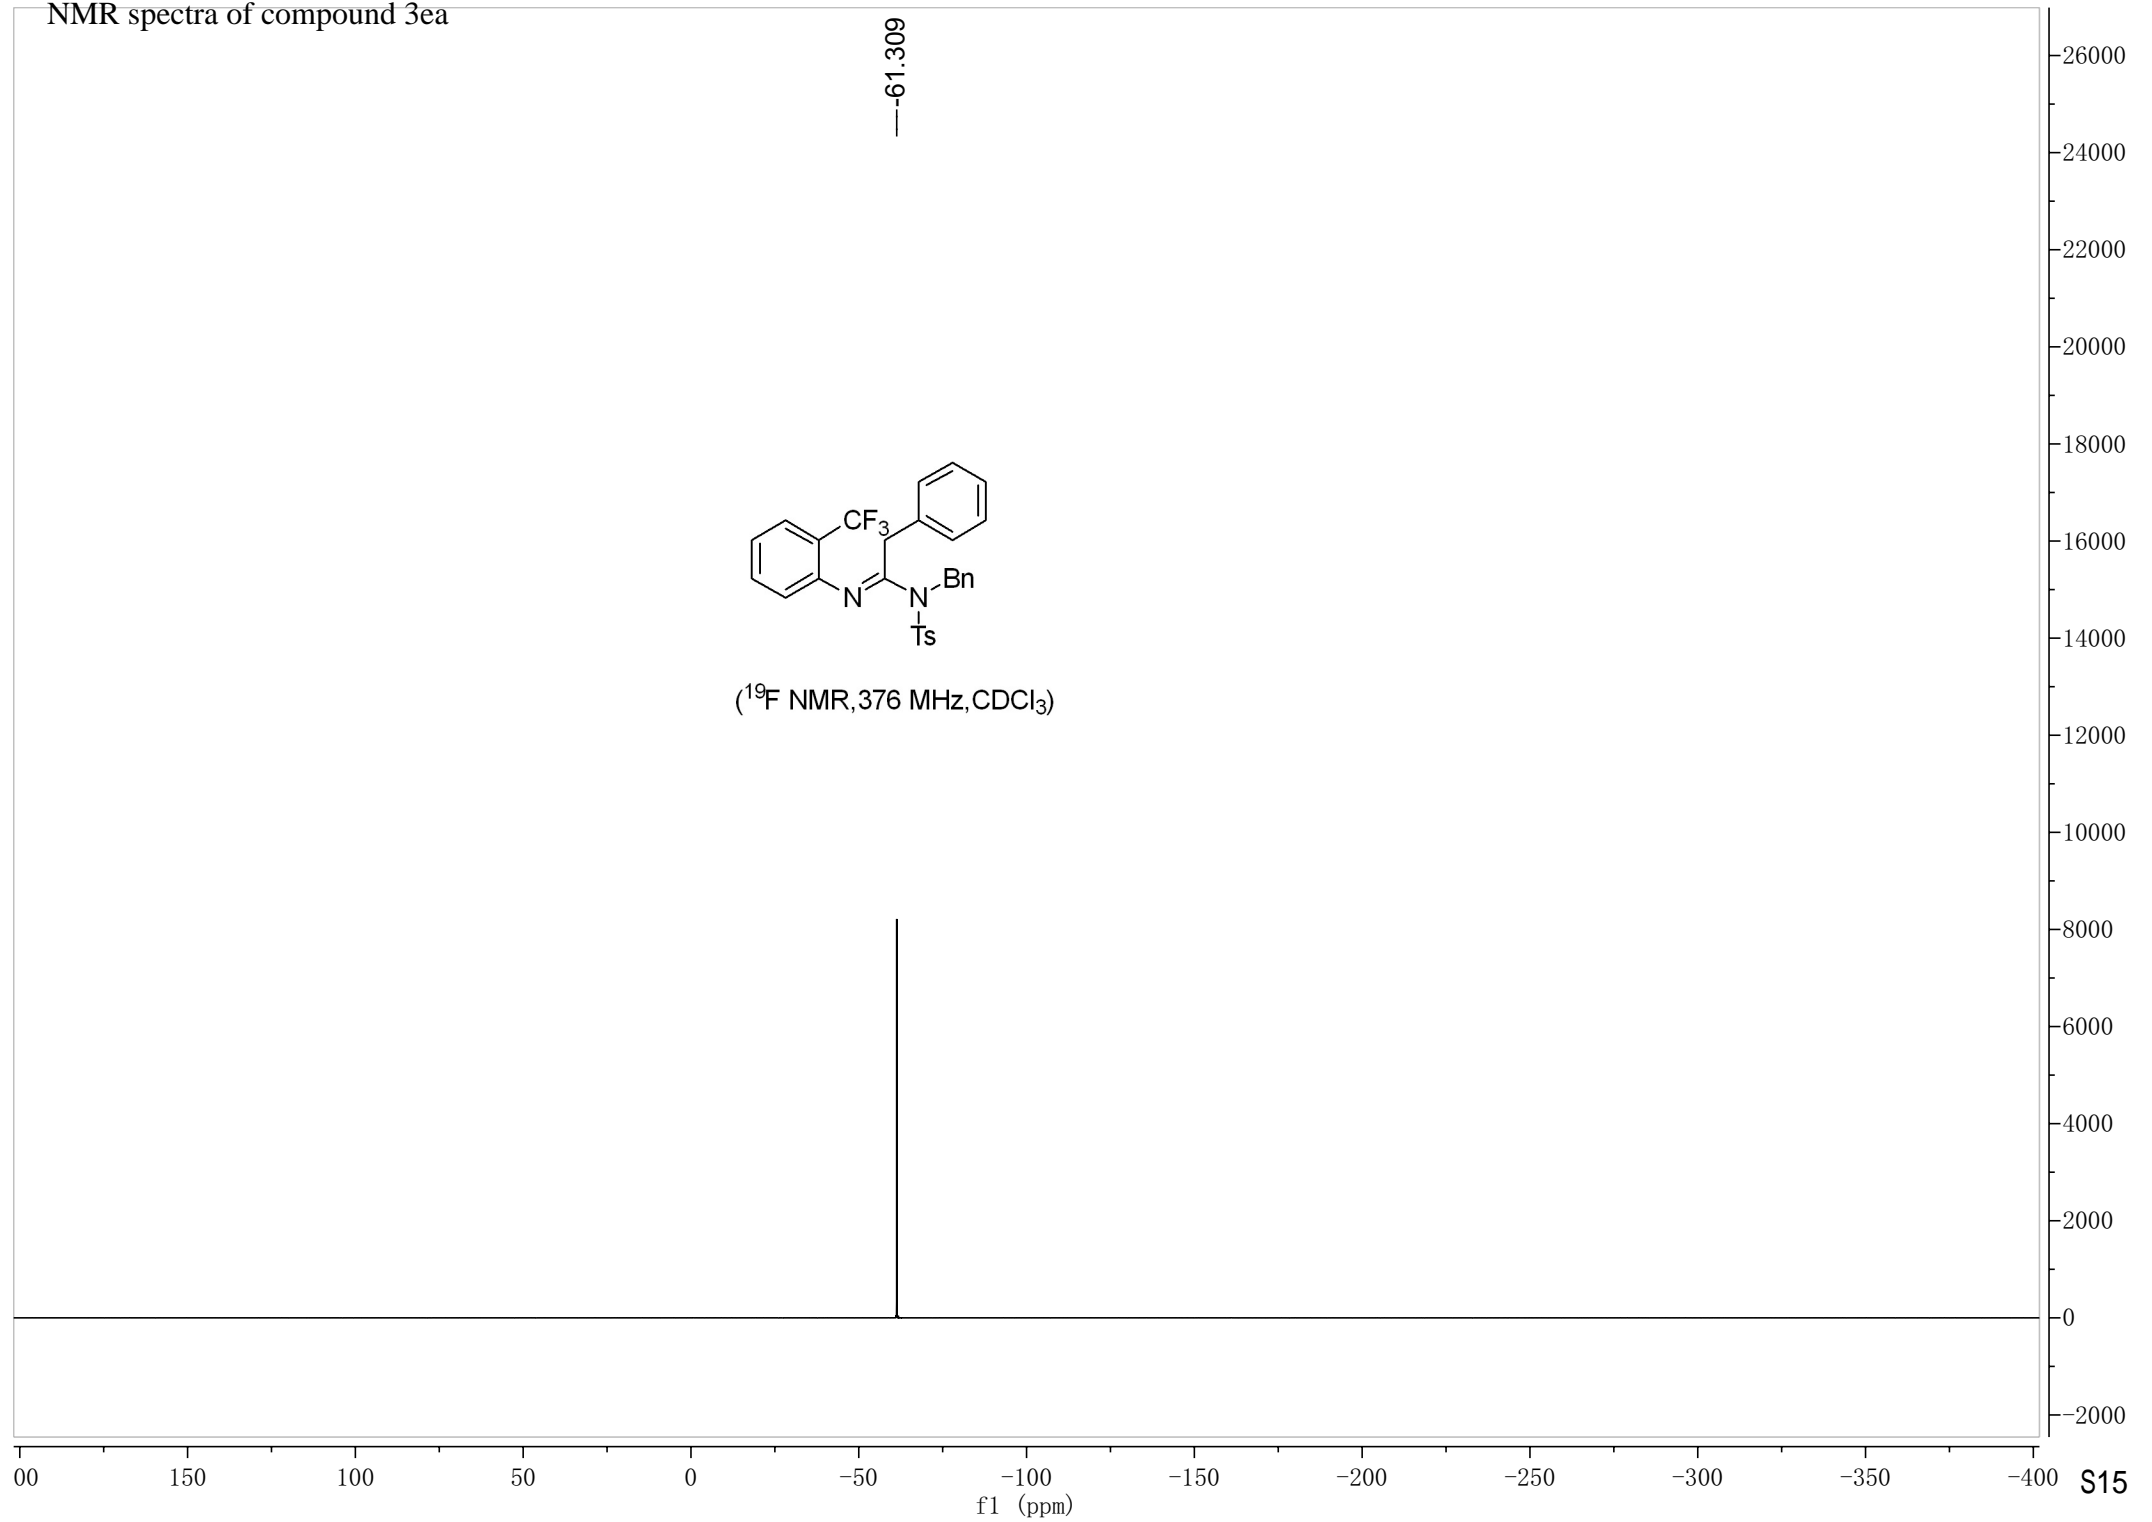

NMR spectra of compound 3fa

7.750  
7.730  
7.357  
7.196  
7.106  
6.986  
6.753  
6.540

4.732  
3.825  
2.473

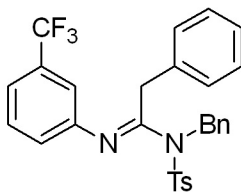

(<sup>1</sup>H NMR, 400 MHz, CDCl<sub>3</sub>)

1.98

1.98

1.03

5.17

3.88

2.00

1.94

1.99

2.02

3.00

8.5 8.0 7.5 7.0 6.5 6.0 5.5 5.0 4.5 4.0 3.5 3.0 2.5 2.0 1.5 1.0 0.5 0.0 -0.5 -1.0 S16

f1 (ppm)

NMR spectra of compound 3fa

156.375  
148.379  
144.468  
135.910  
135.536  
134.267  
131.839  
131.520  
131.198  
129.569  
129.522  
128.894  
128.610  
128.533  
128.228  
128.205  
127.497  
126.763  
125.206  
122.795  
122.499  
120.073  
116.601  
116.566

—51.051

—37.694

—21.651

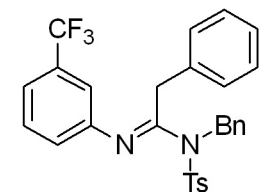

(<sup>13</sup>C NMR, 100 MHz, CDCl<sub>3</sub>)

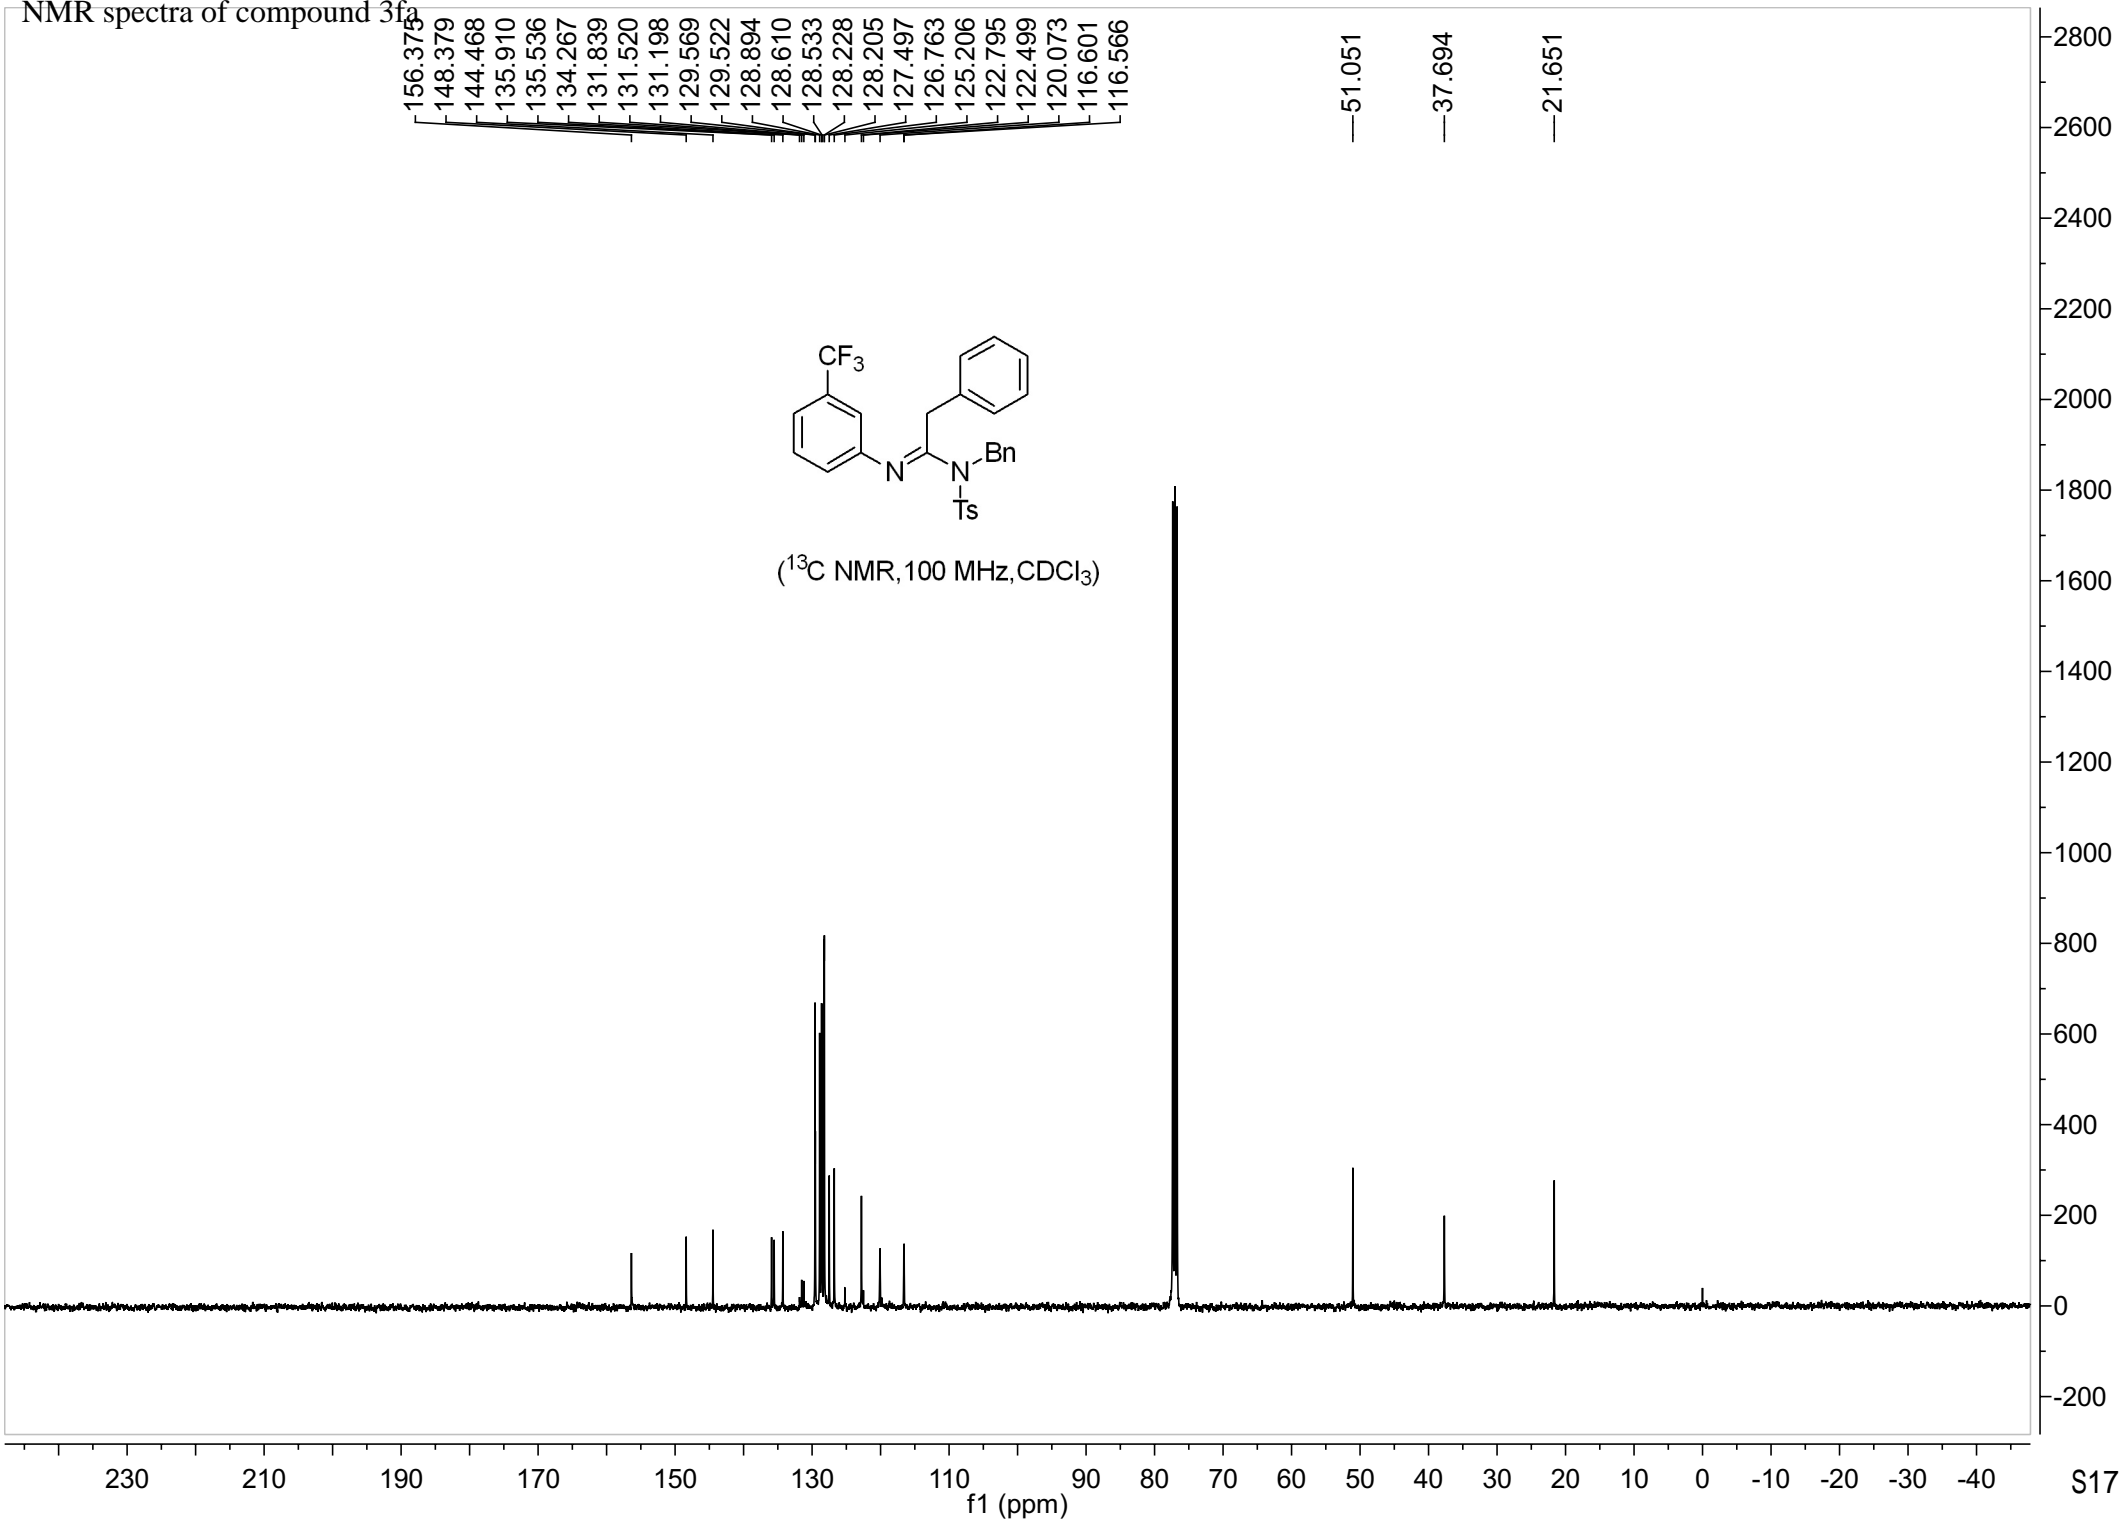

NMR spectra of compound 3fa

---62.835

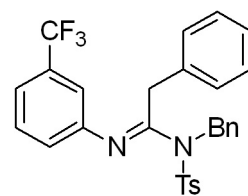

(<sup>19</sup>F NMR, 376 MHz, CDCl<sub>3</sub>)

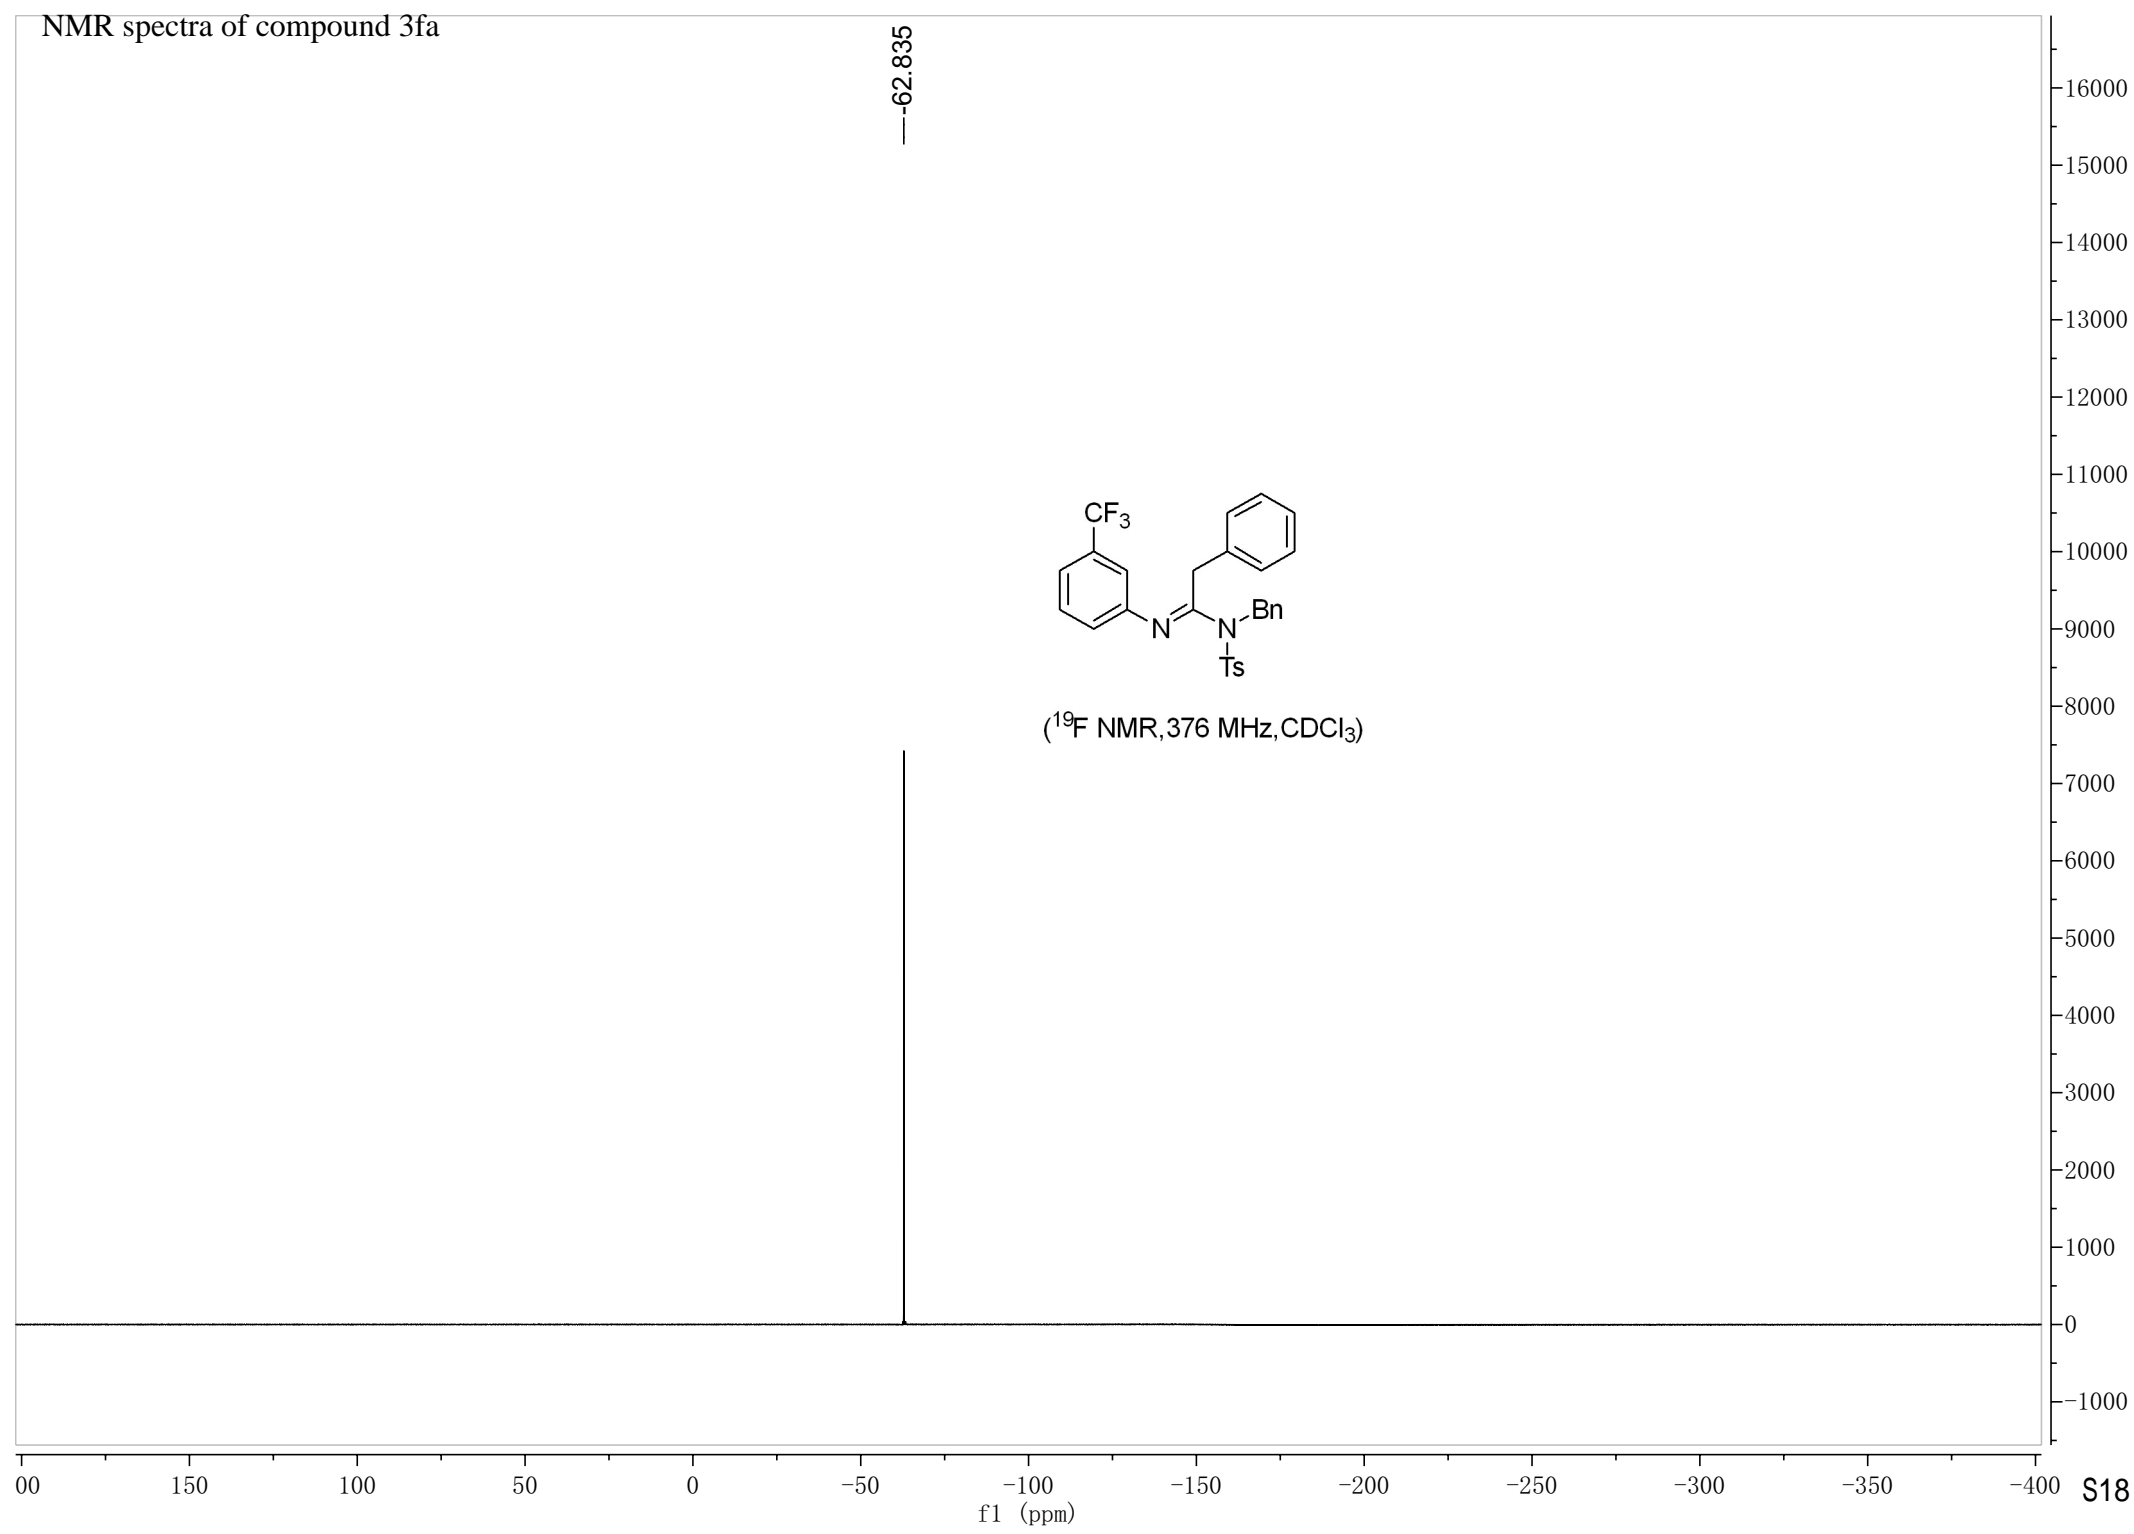

NMR spectra of compound 3ga

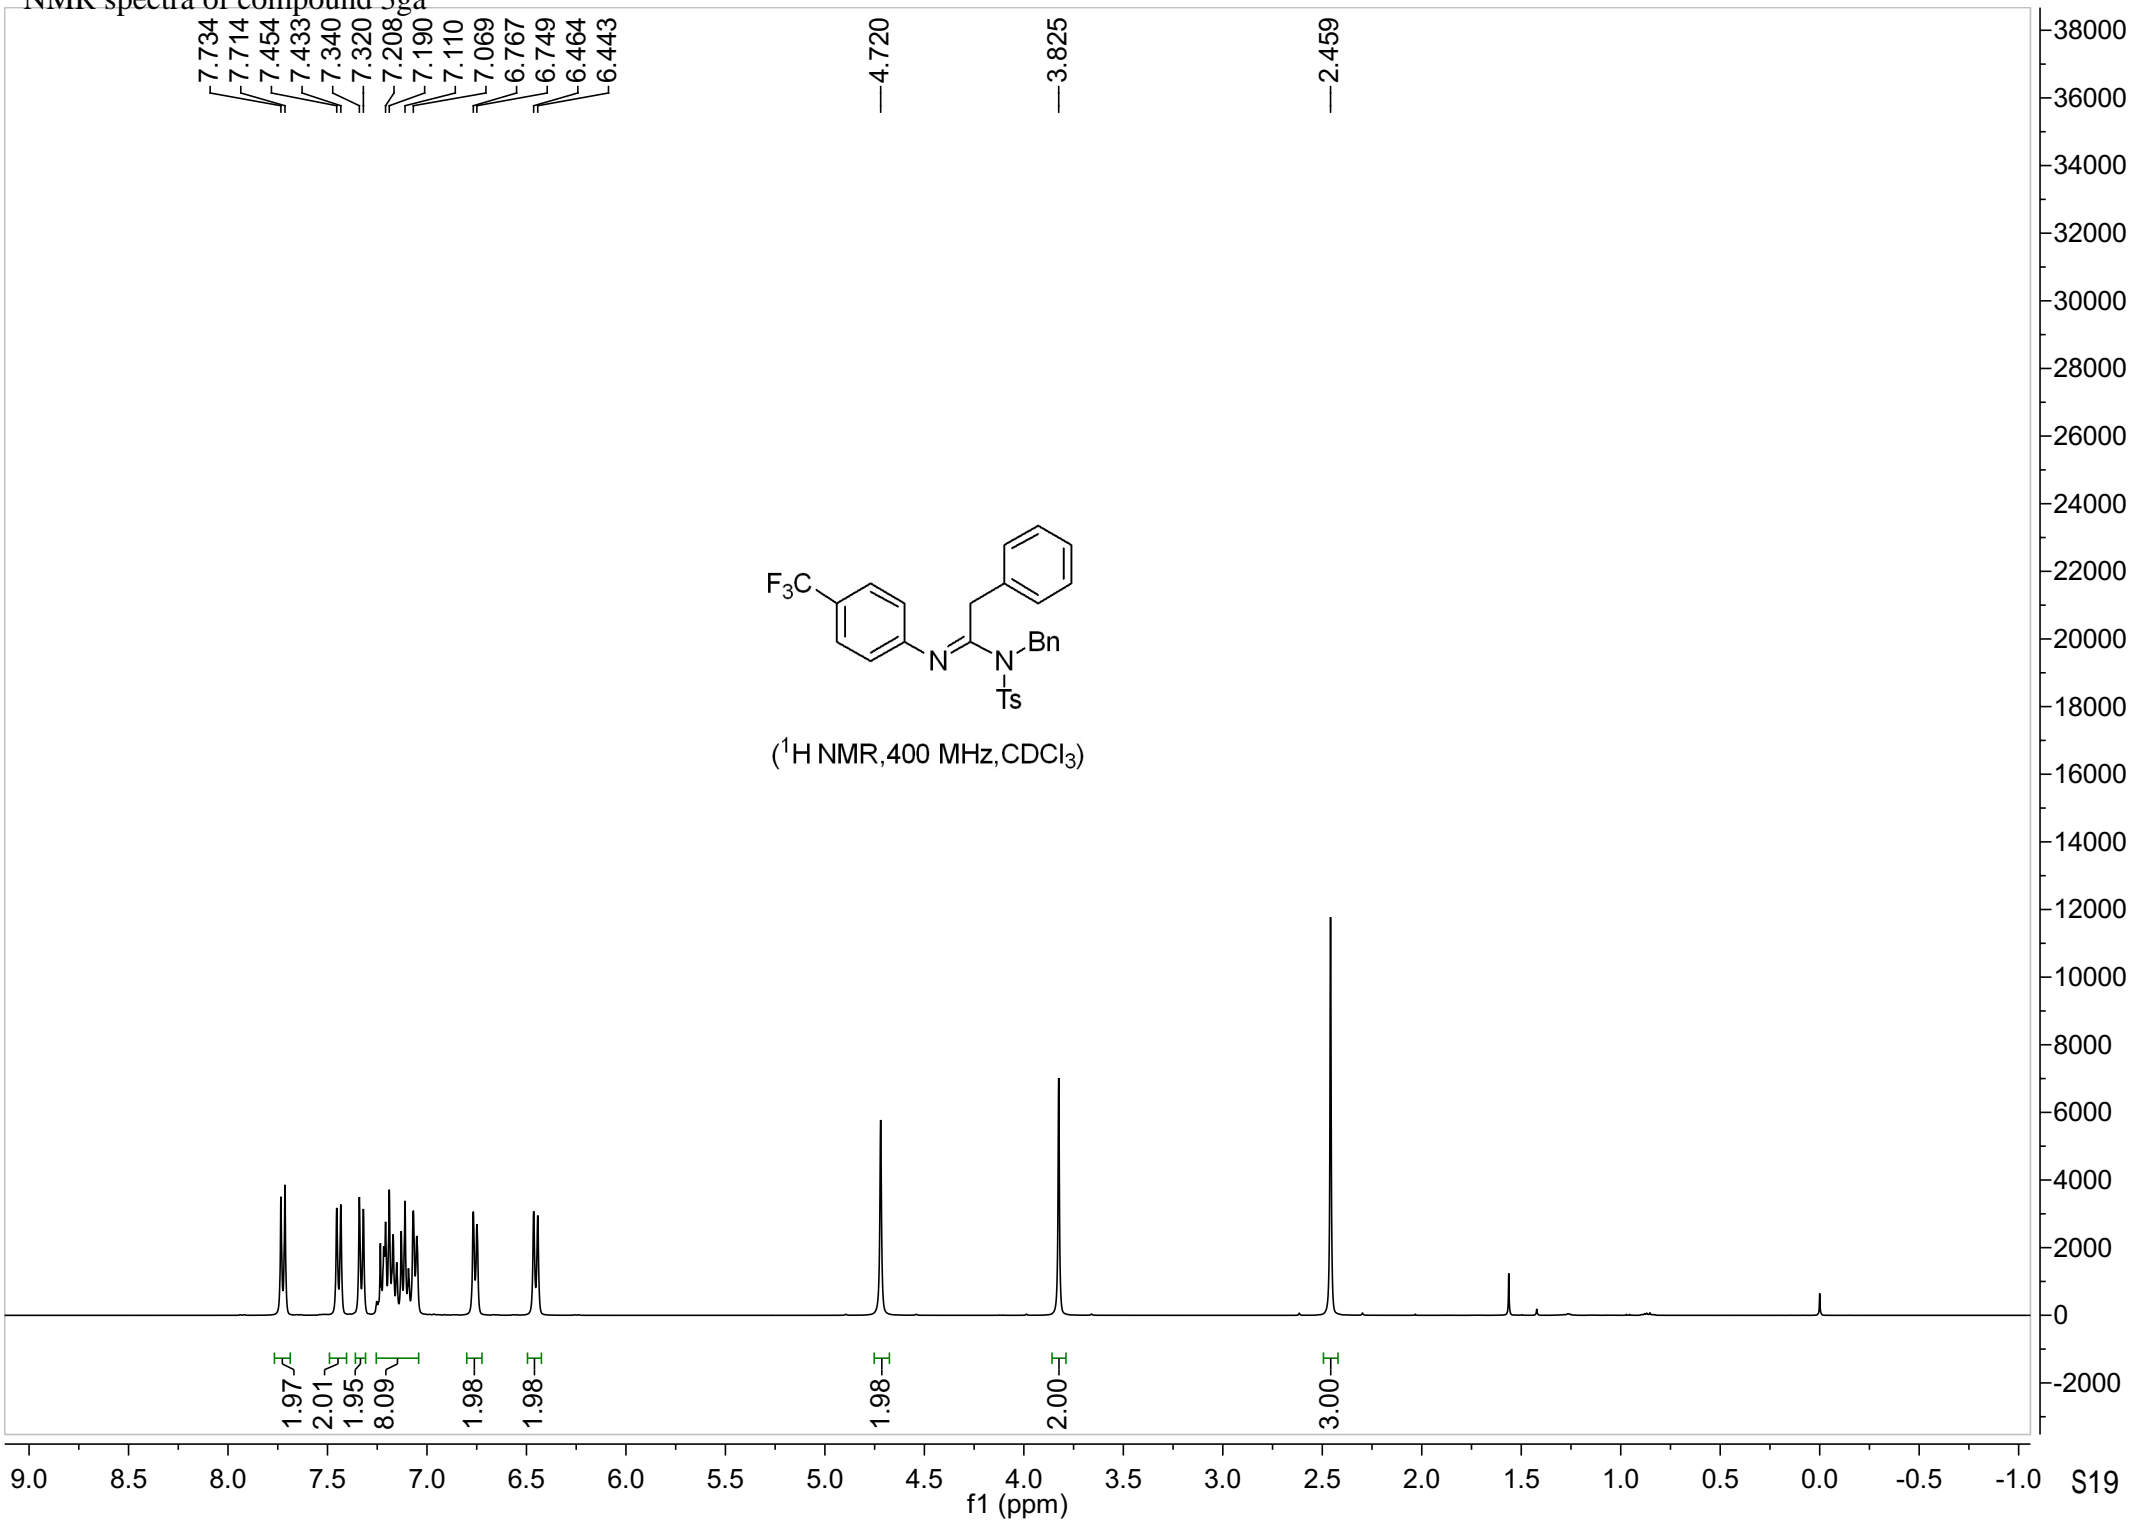

NMR spectra of compound 3ga

155.791  
151.079  
144.456  
135.933  
135.552  
134.347  
129.575  
128.919  
128.605  
128.569  
128.241  
128.214  
127.497  
126.784  
126.284  
126.250  
126.064  
125.739  
125.665  
125.414  
125.090  
122.967  
119.719

—51.016

—37.720

—21.680

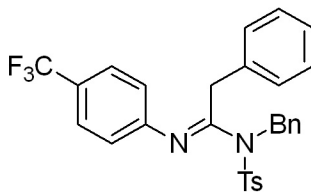

(<sup>13</sup>C NMR, 100 MHz, CDCl<sub>3</sub>)

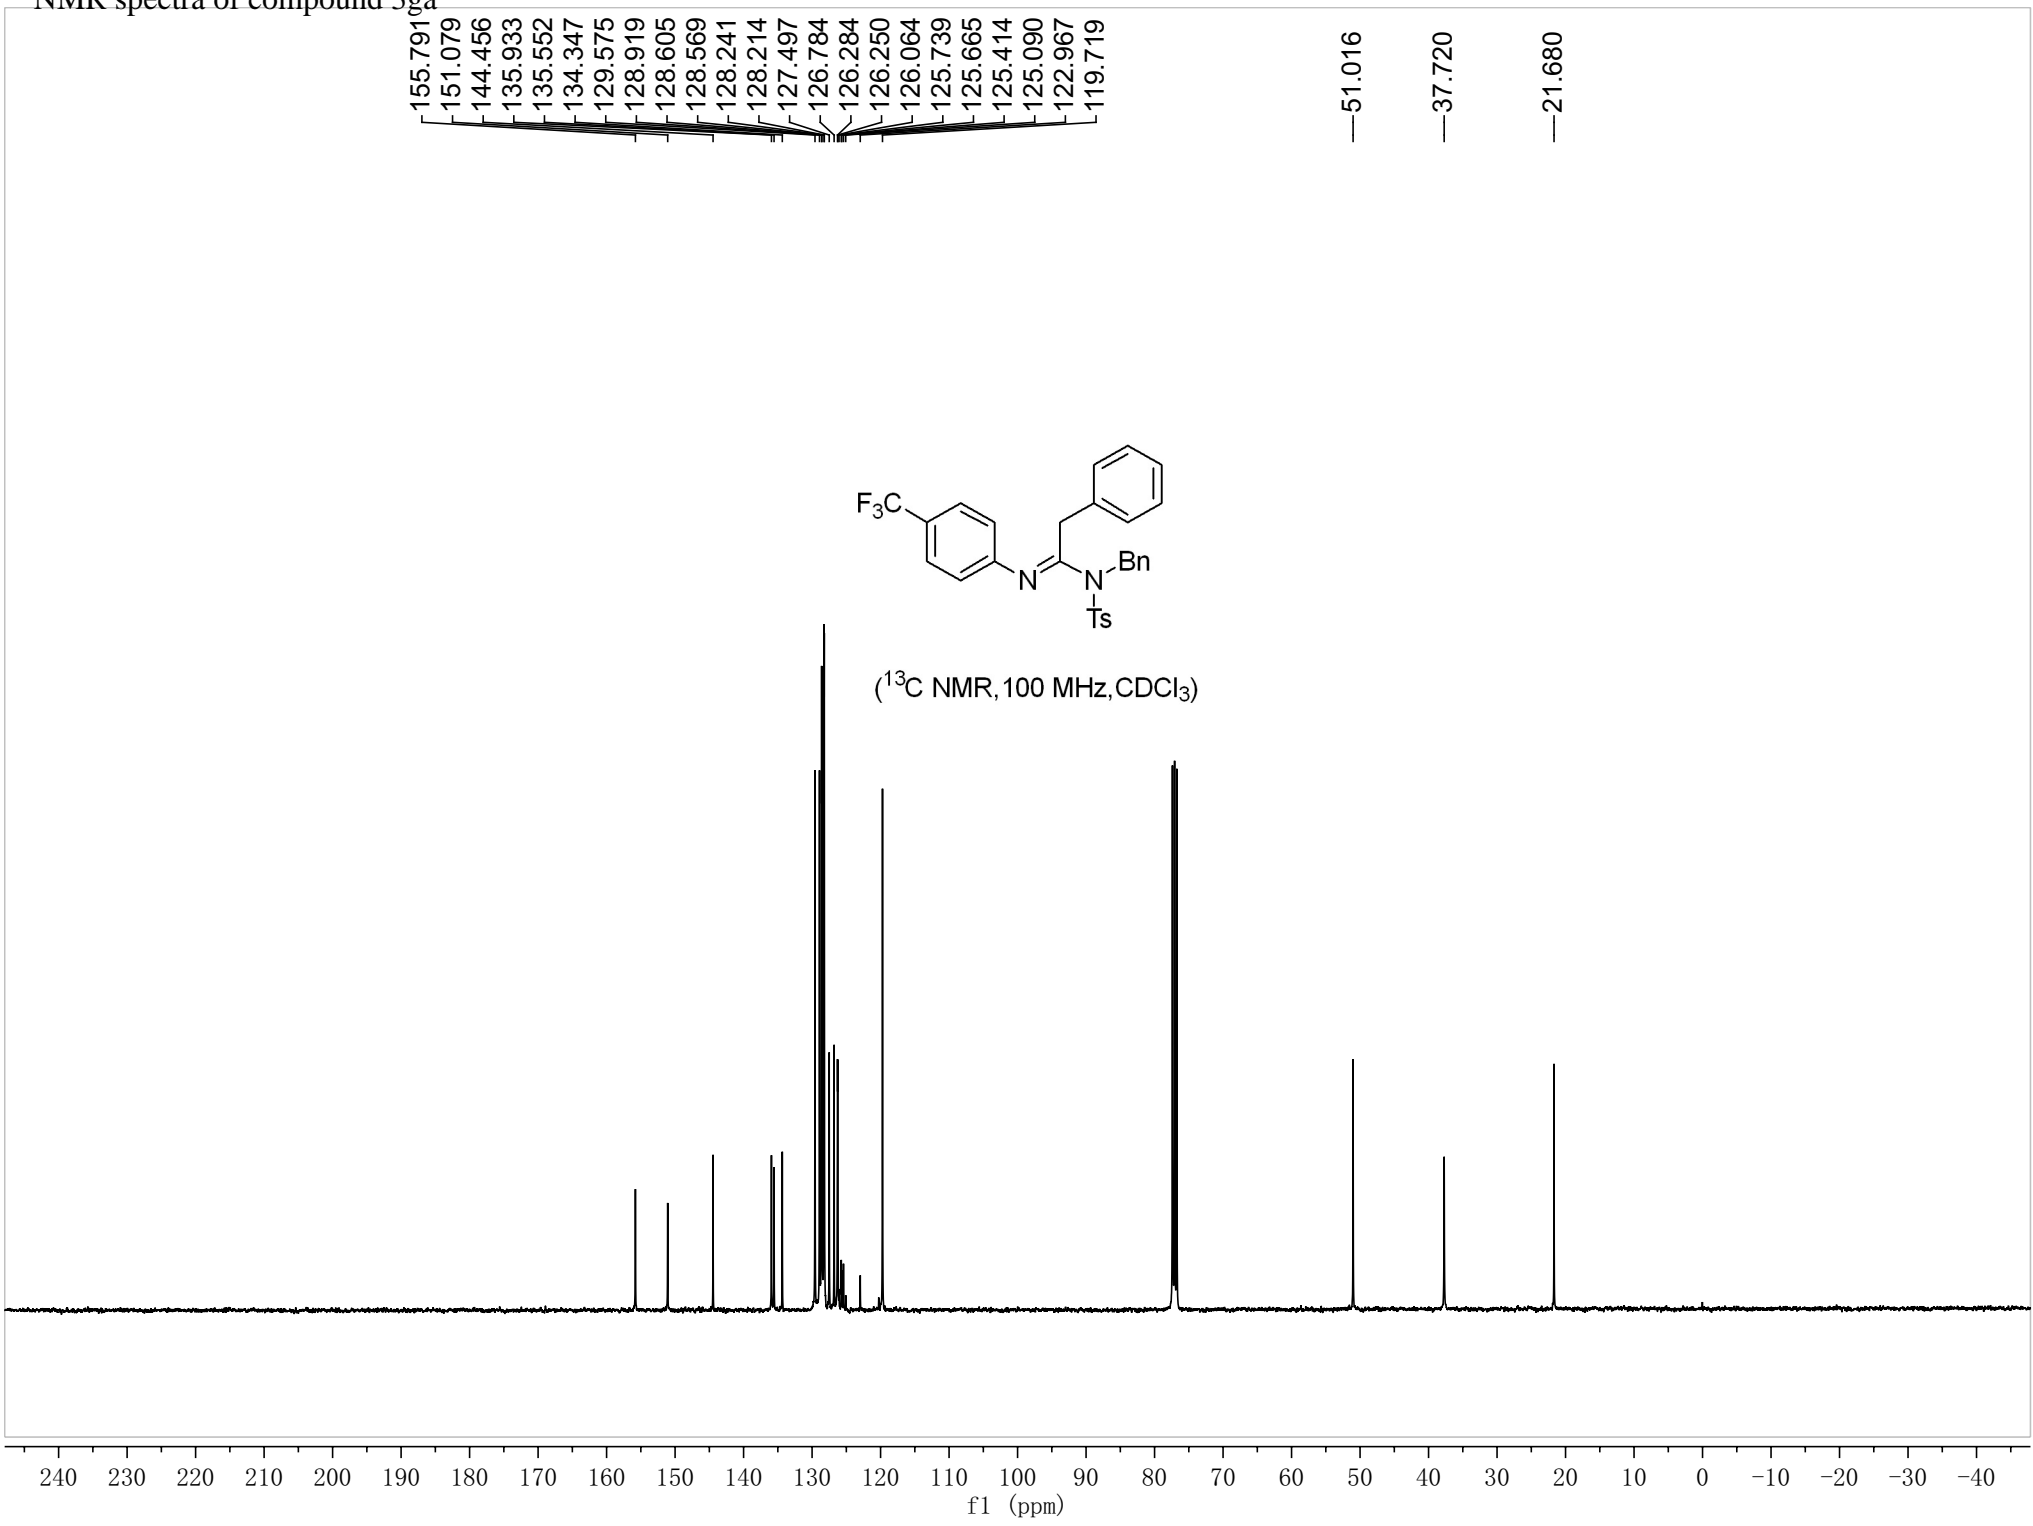



NMR spectra of compound 3ga

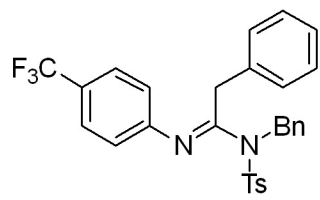

(<sup>19</sup>F NMR, 376 MHz, CDCl<sub>3</sub>)

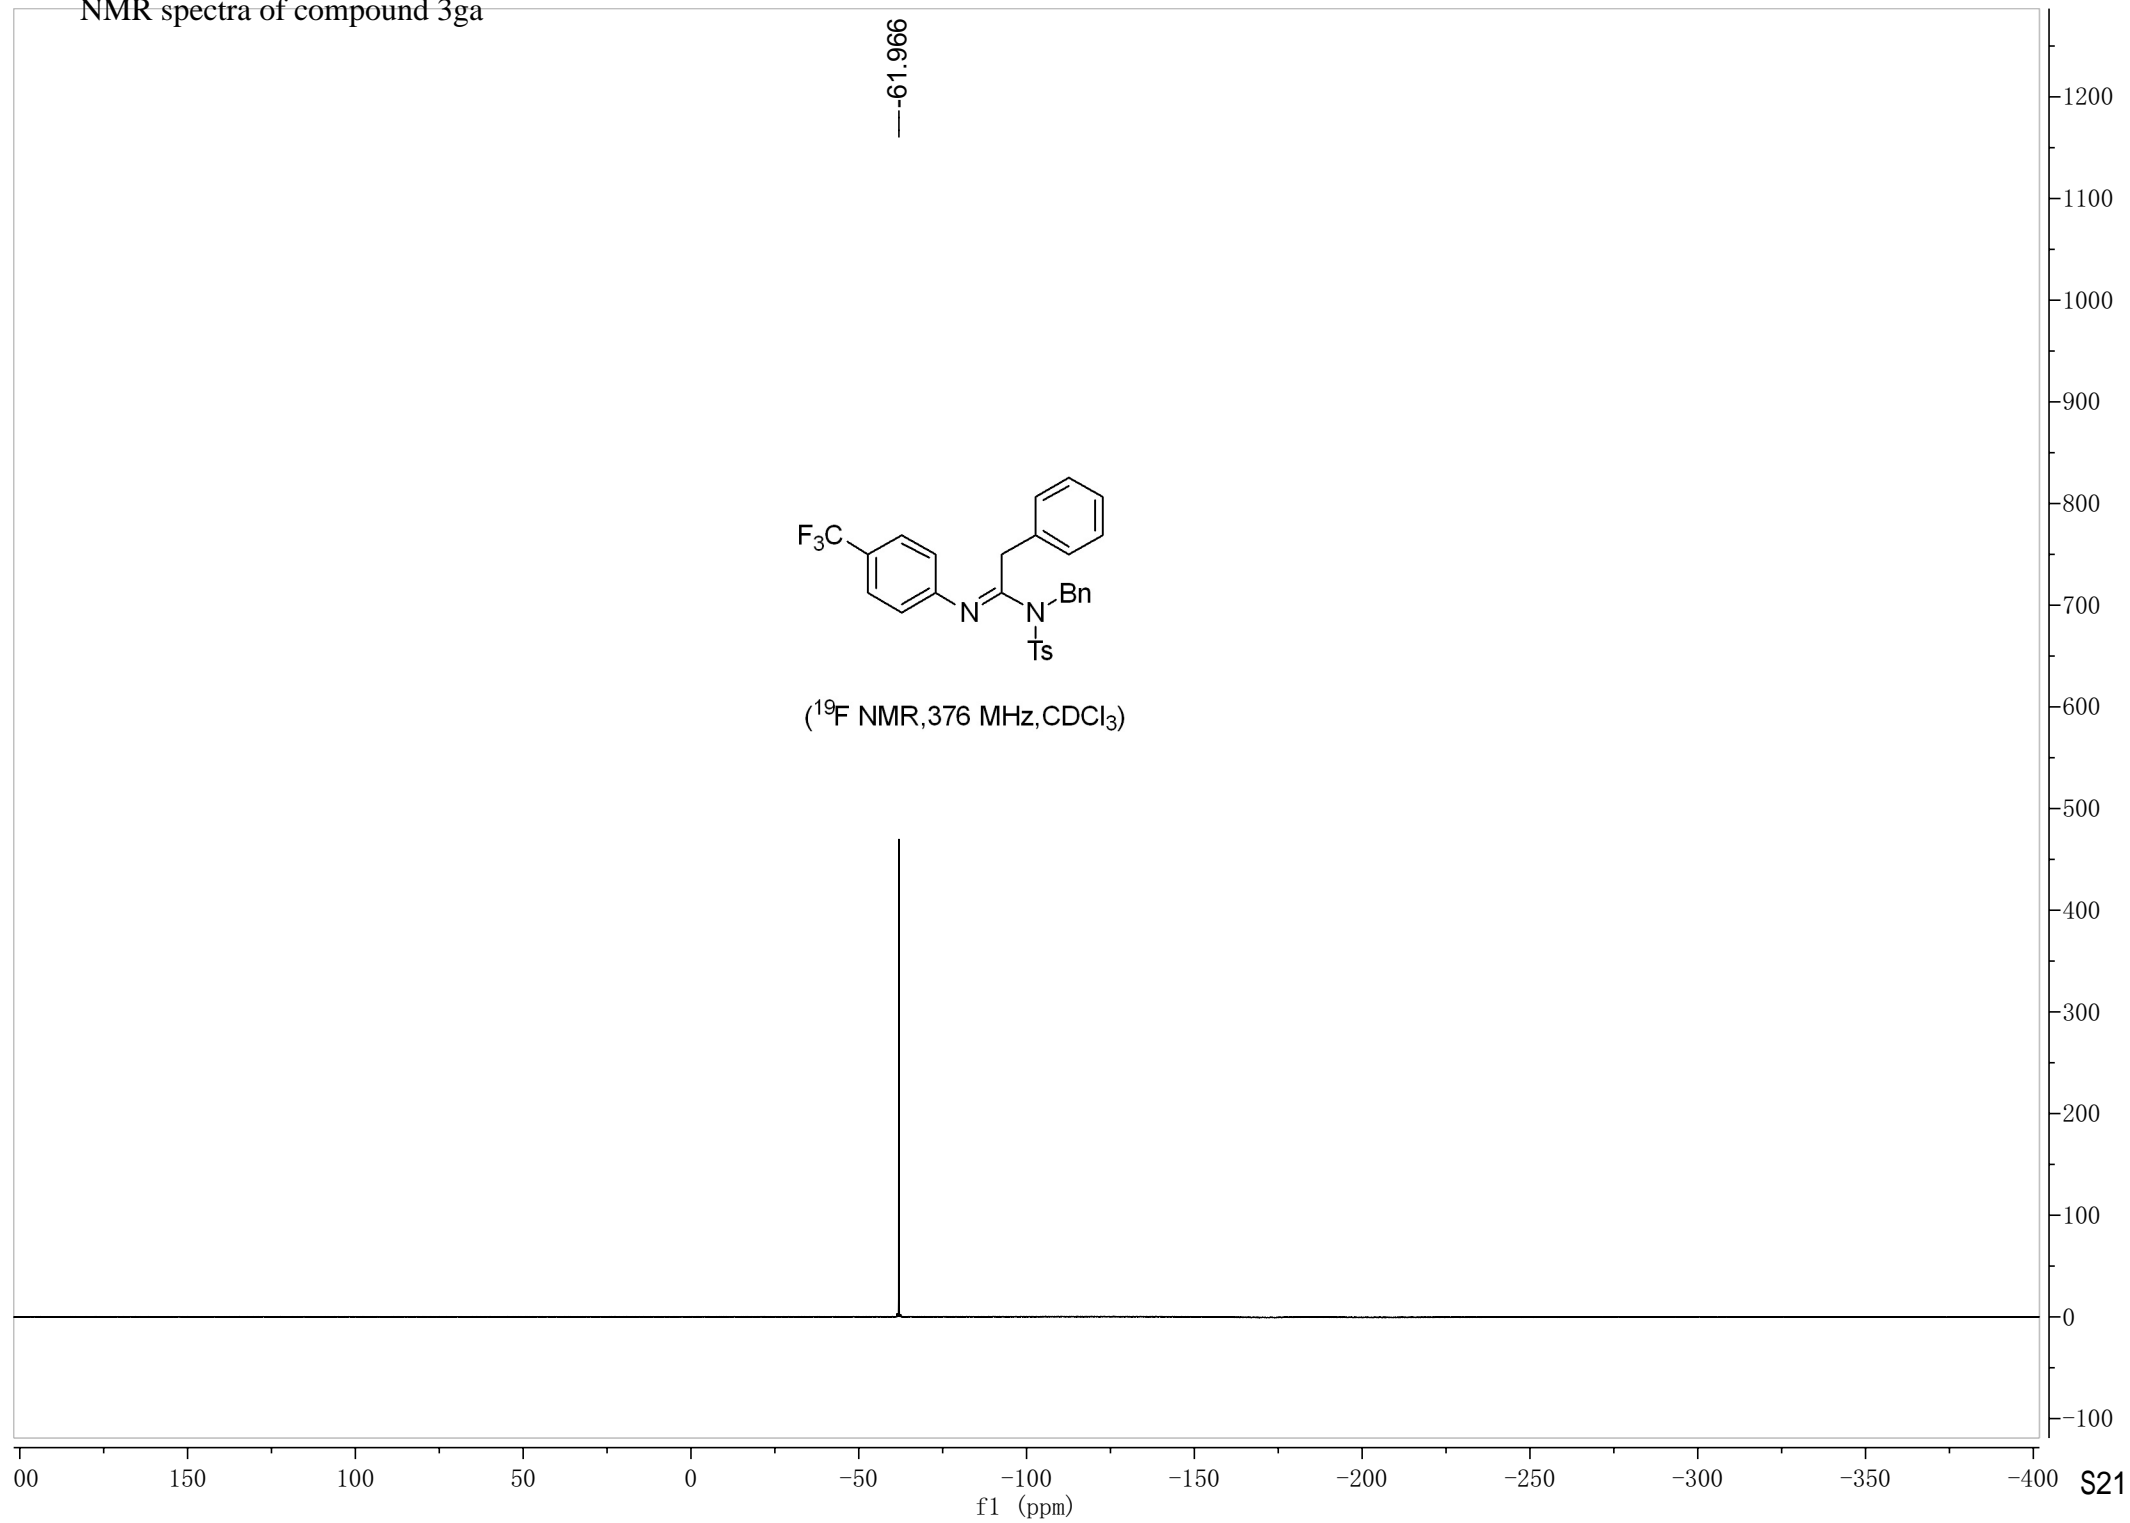

NMR spectra of compound 3ha

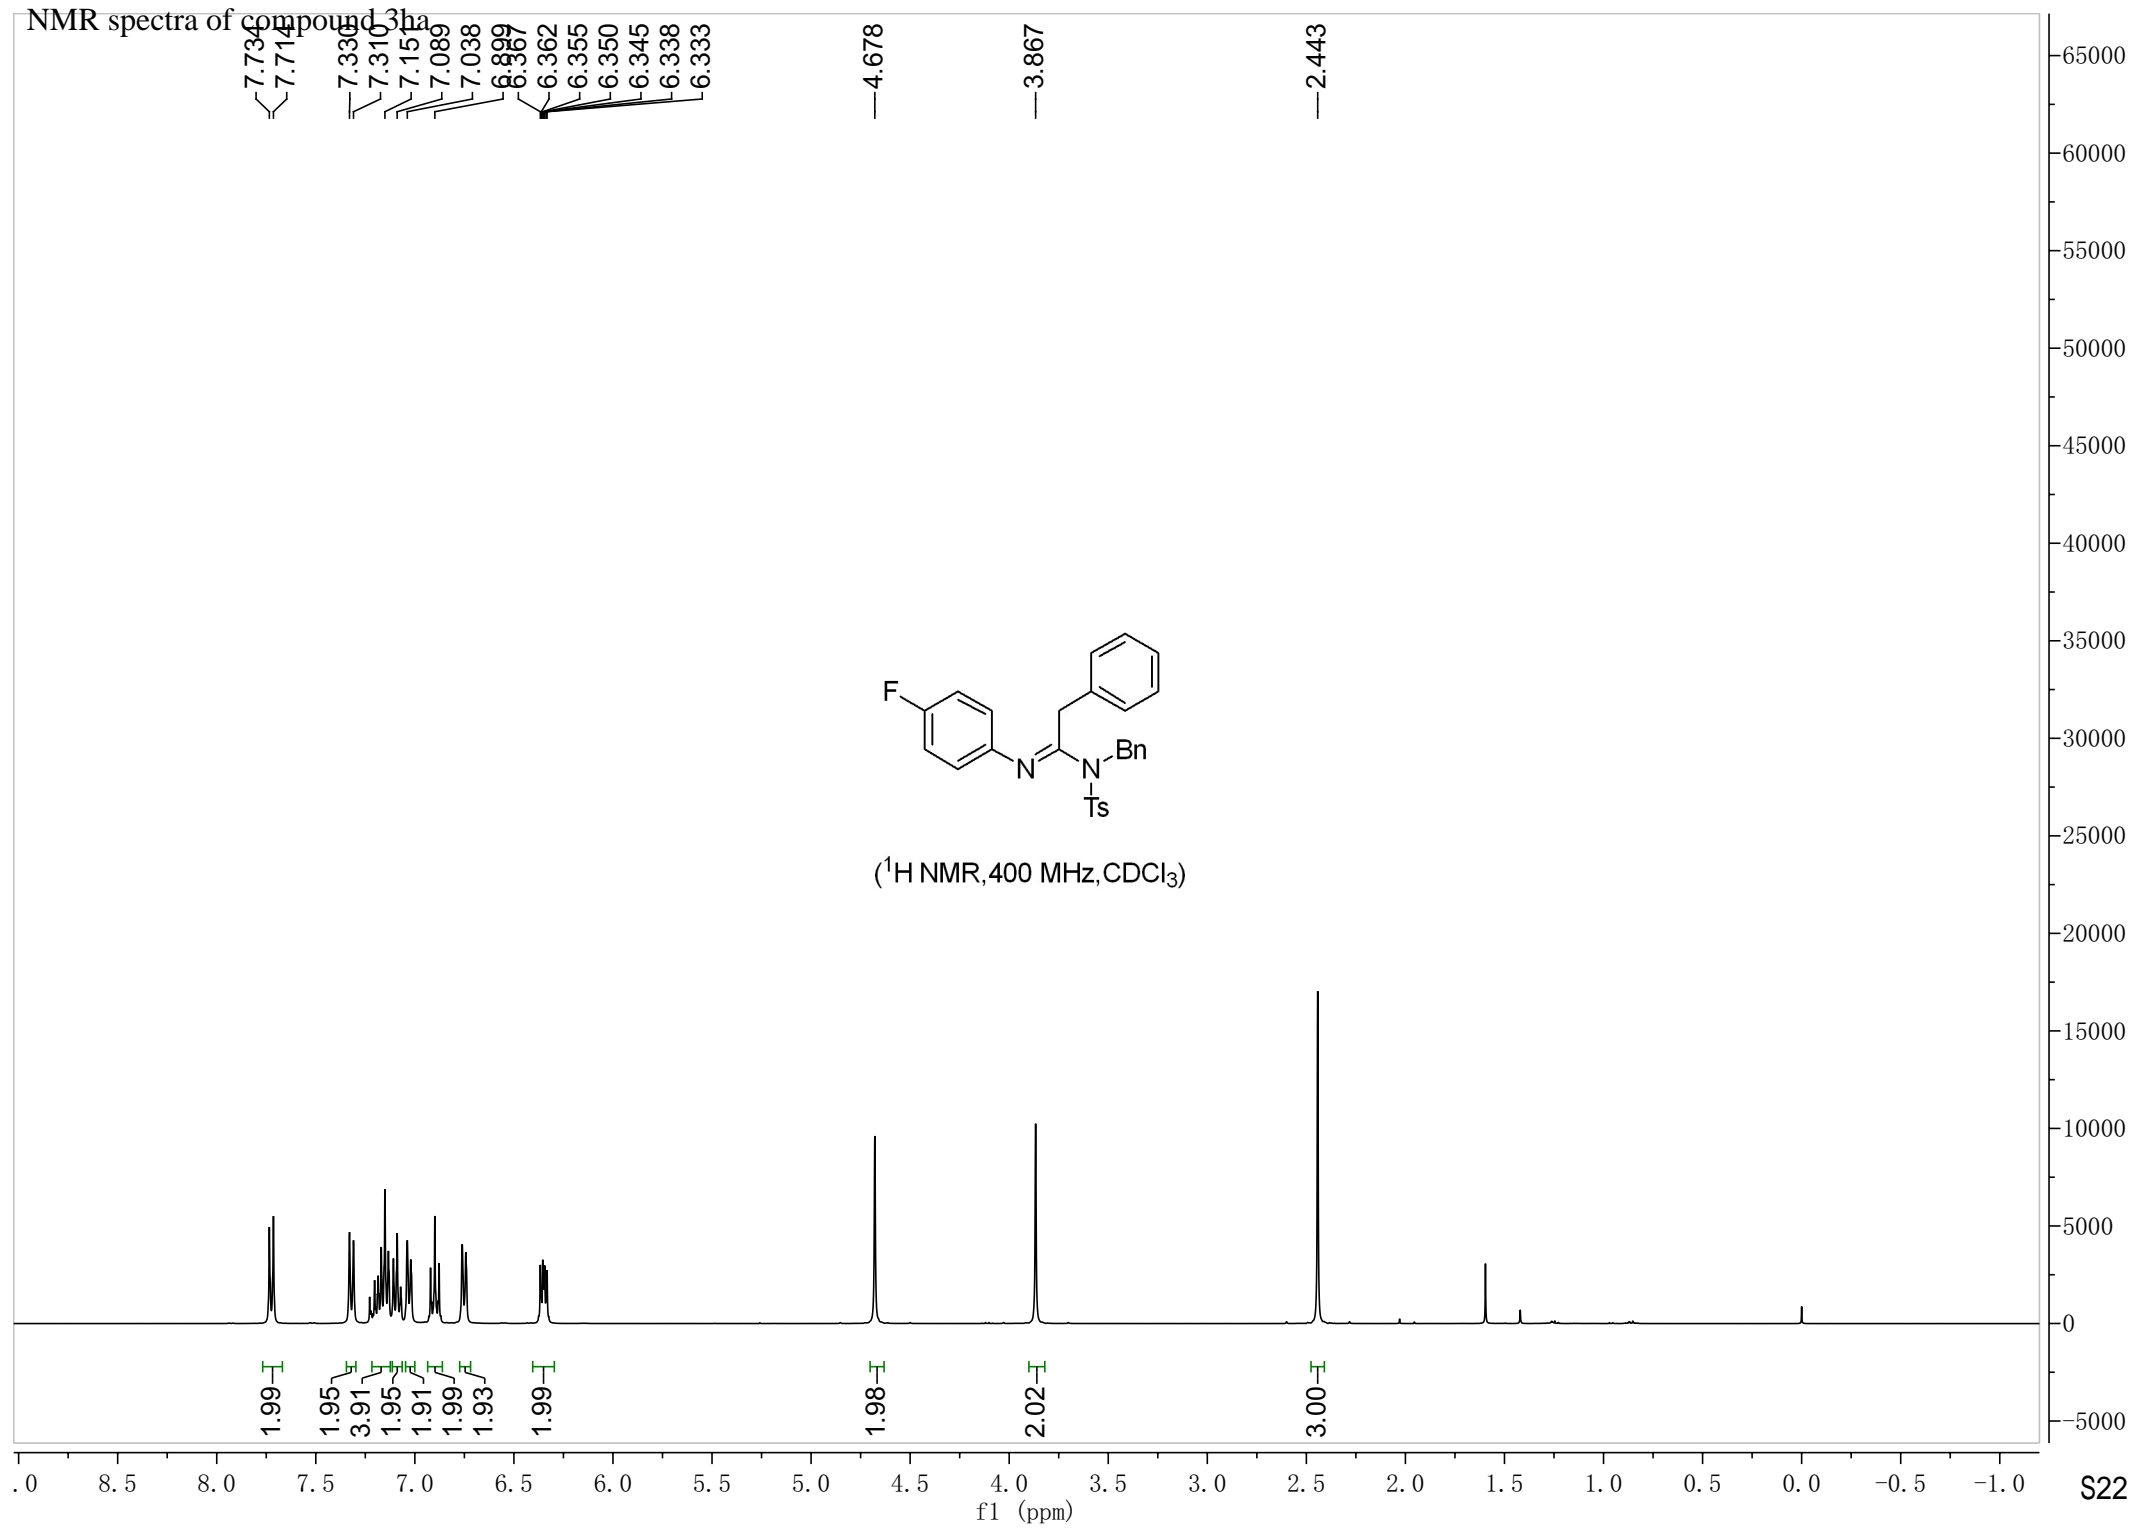

NMR spectra of compound 3ha

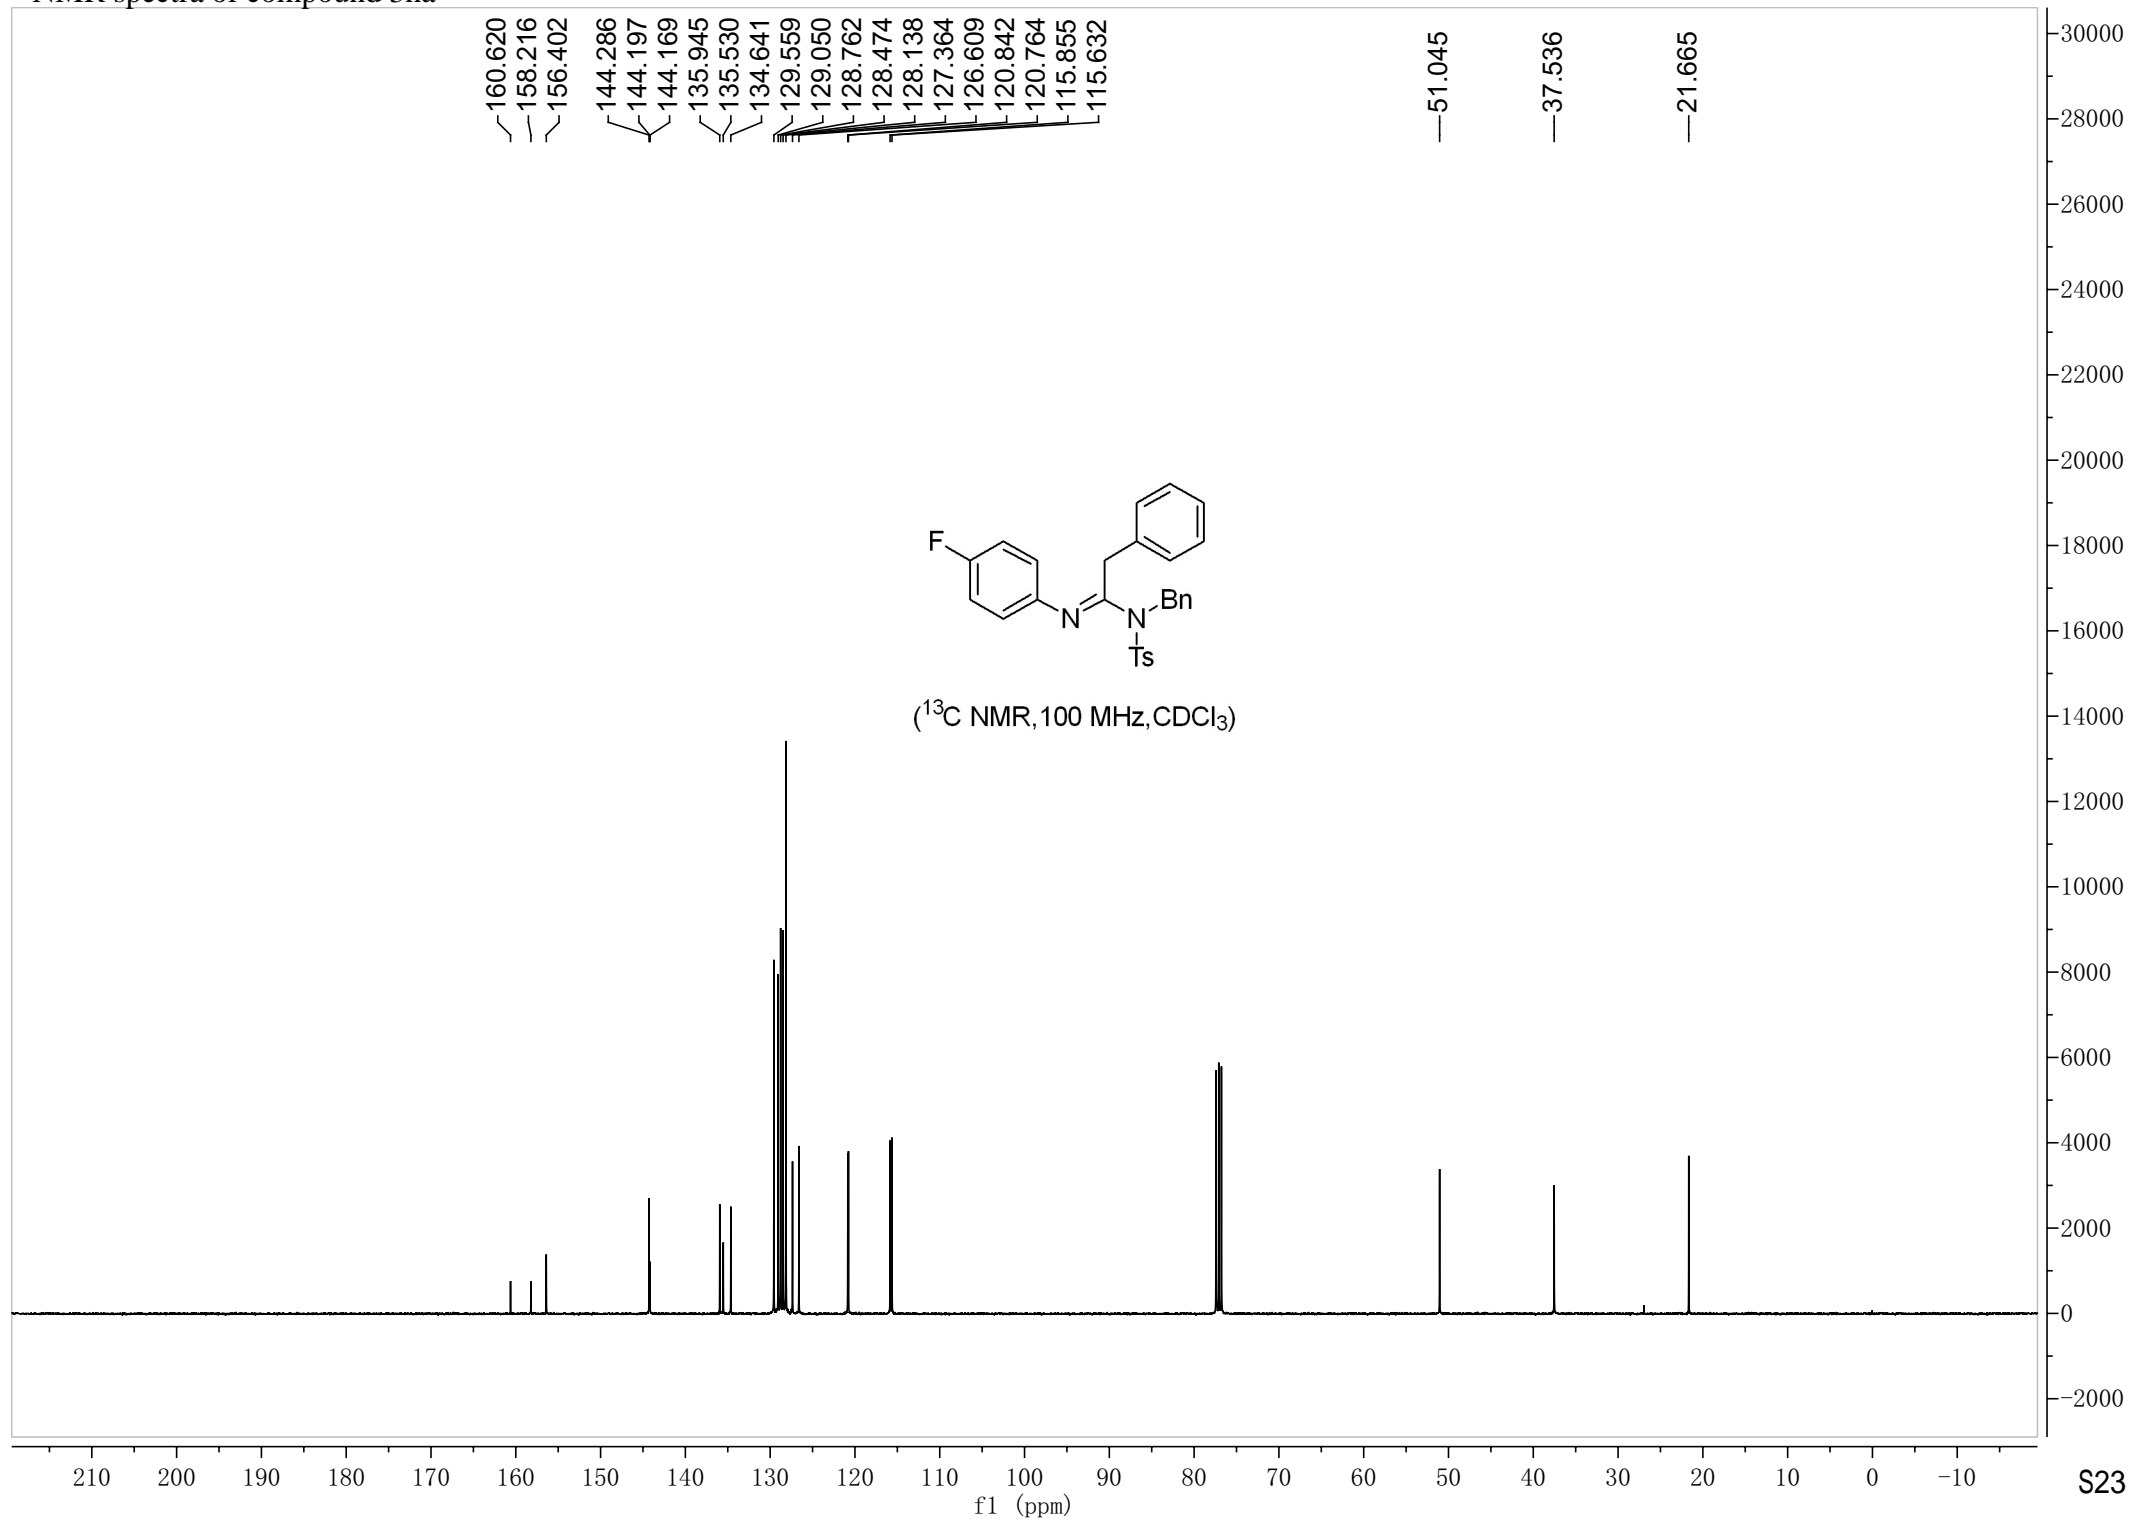

NMR spectra of compound 3ha

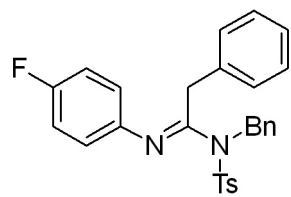

(<sup>19</sup>F NMR, 376 MHz, CDCl<sub>3</sub>)

---120.483

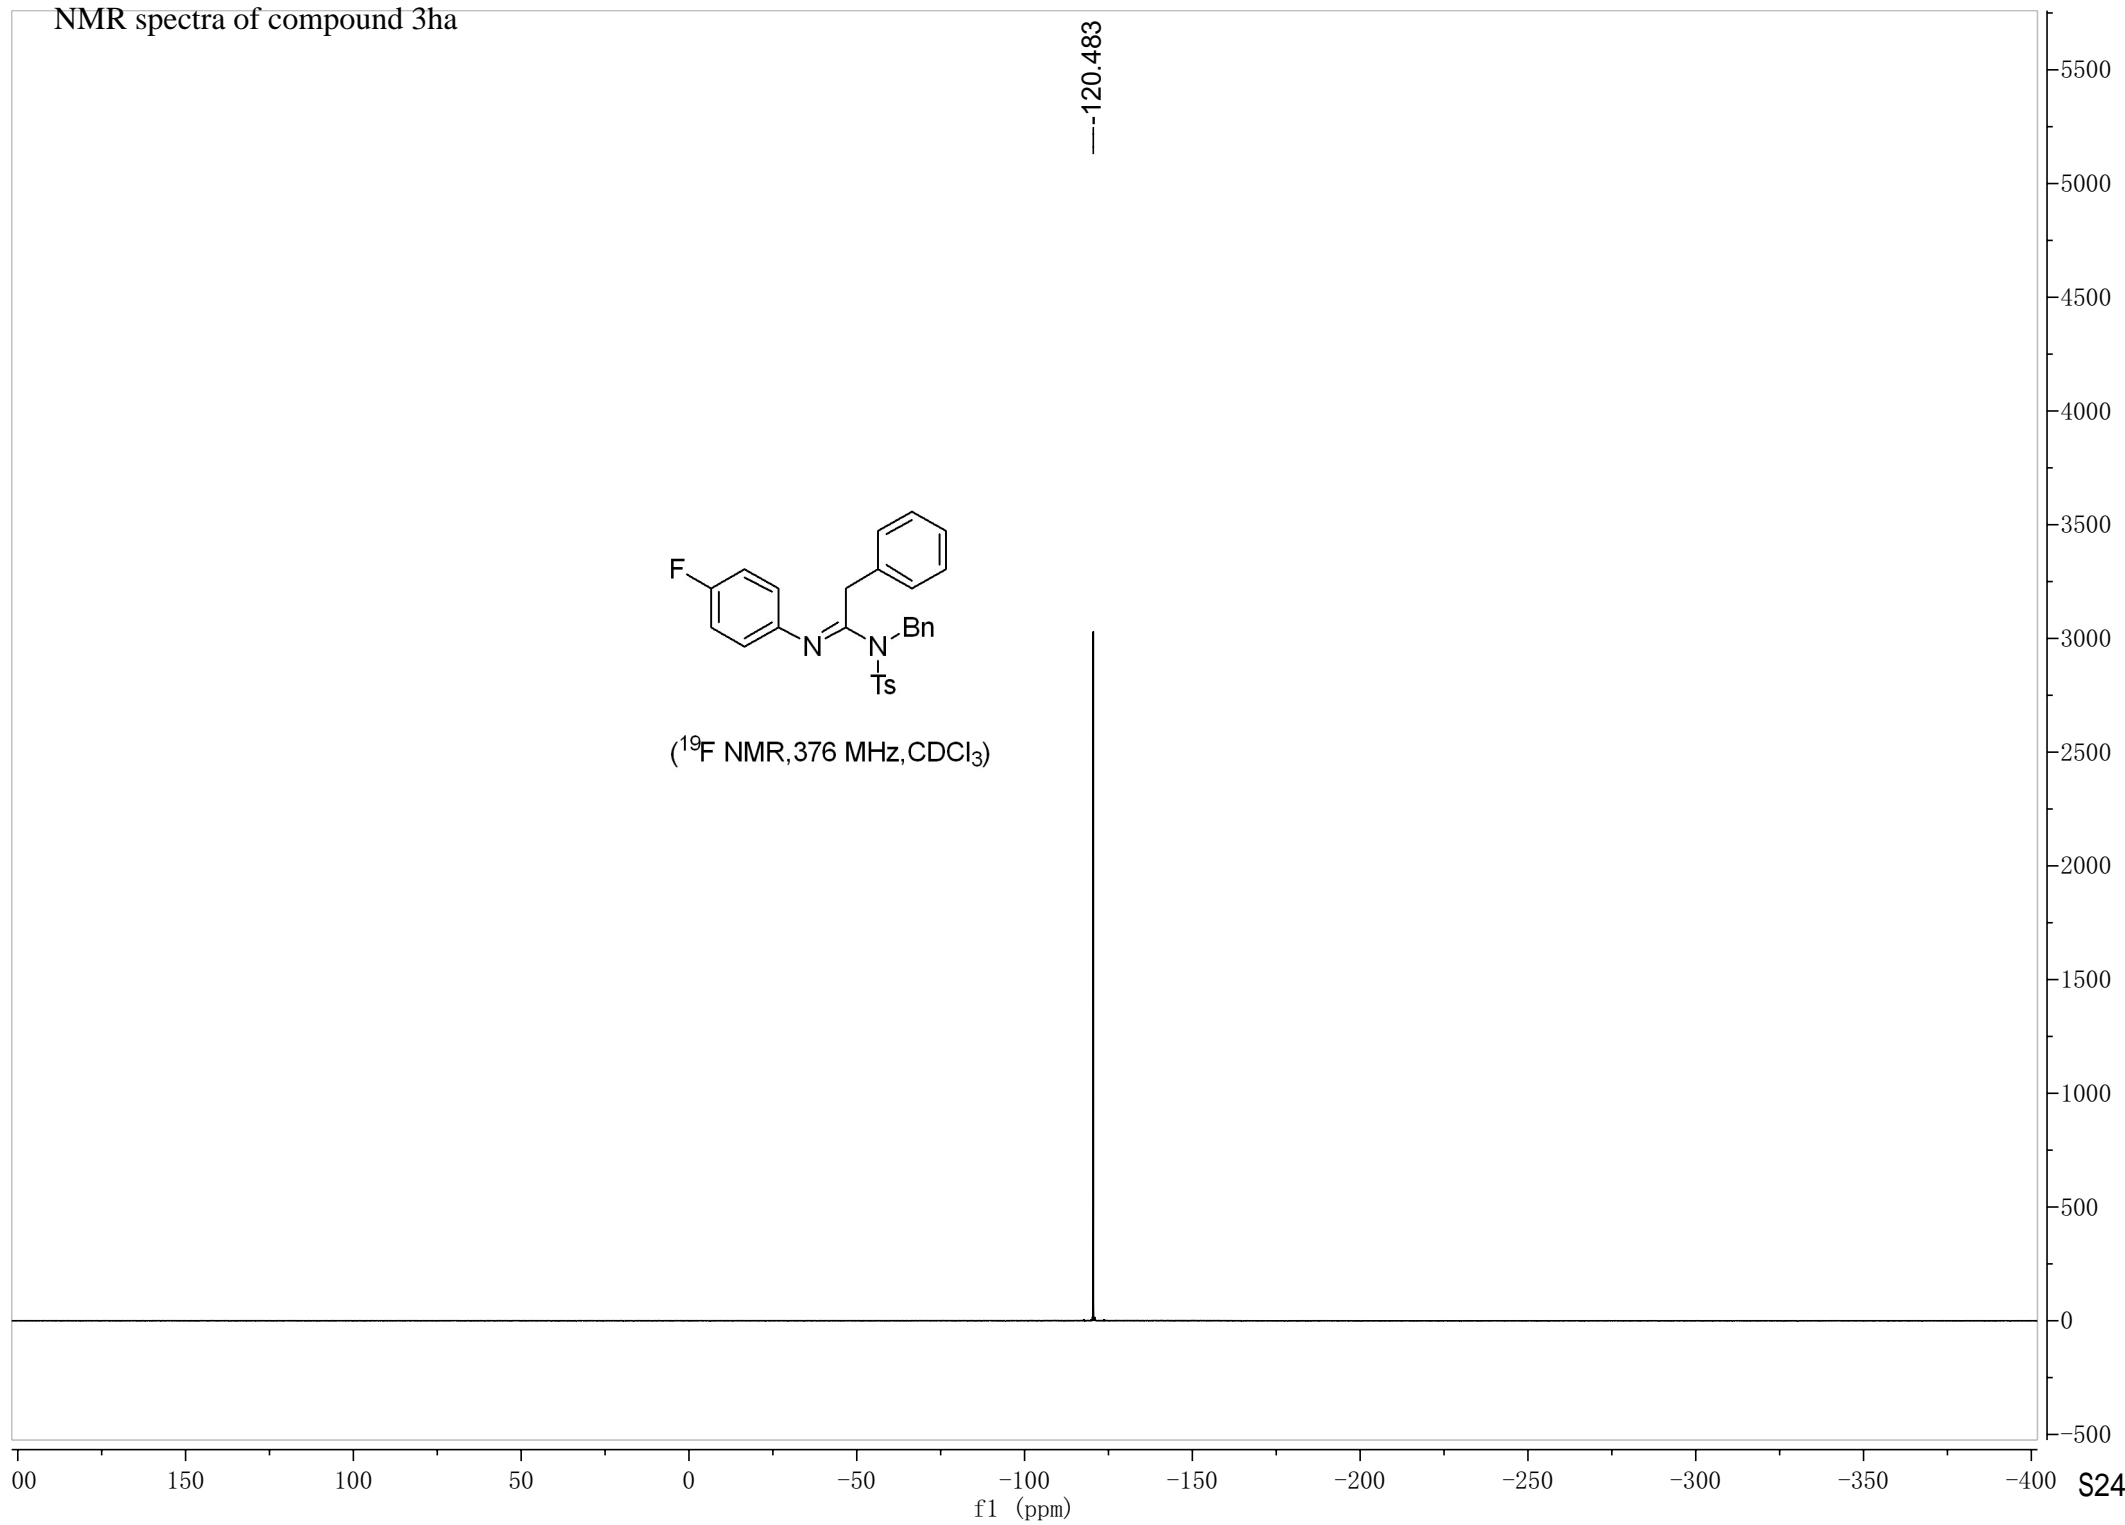

NMR spectra of compound 3ia

7.729  
7.708  
7.338  
7.318  
7.181a  
7.176  
7.163  
7.155  
7.104  
6.358  
6.317

4.683  
3.845  
2.461

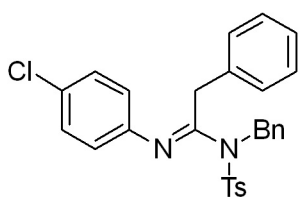

(<sup>1</sup>H NMR, 400 MHz, CDCl<sub>3</sub>)

1.94  
1.93  
5.84  
1.98  
1.88  
1.95  
1.93

1.95

1.99

3.00

0 8.5 8.0 7.5 7.0 6.5 6.0 5.5 5.0 4.5 4.0 3.5 3.0 2.5 2.0 1.5 1.0 0.5 0.0 -0.5 -1.0

f1 (ppm)

NMR spectra of compound 3ia

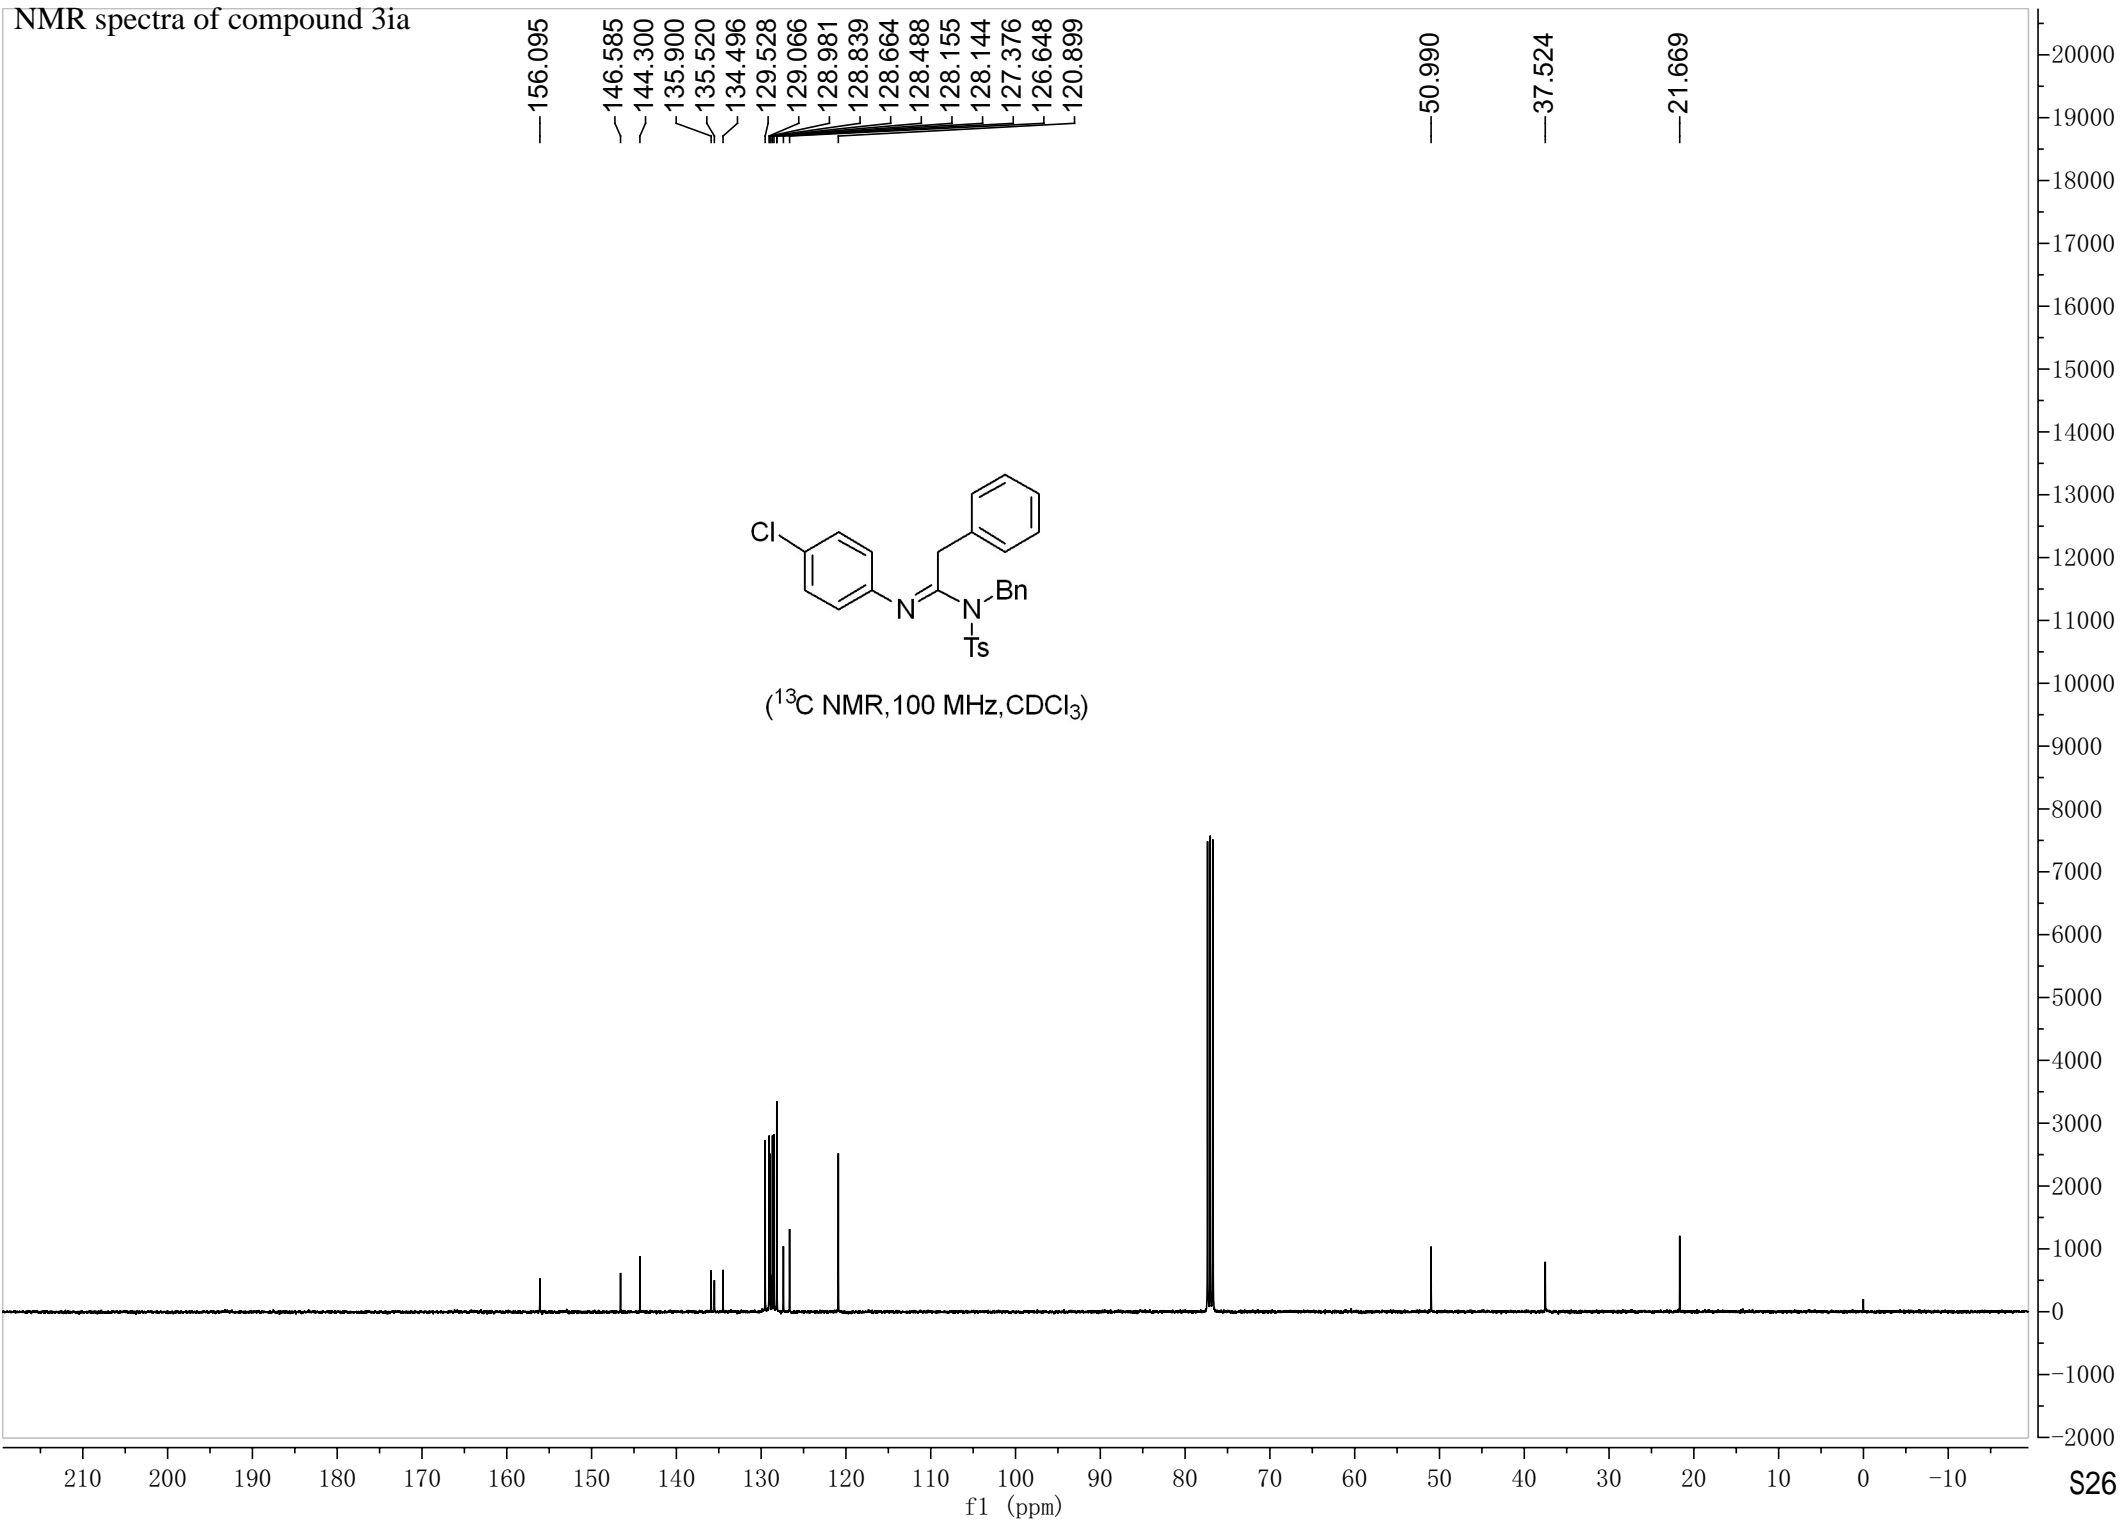

NMR spectra of compound

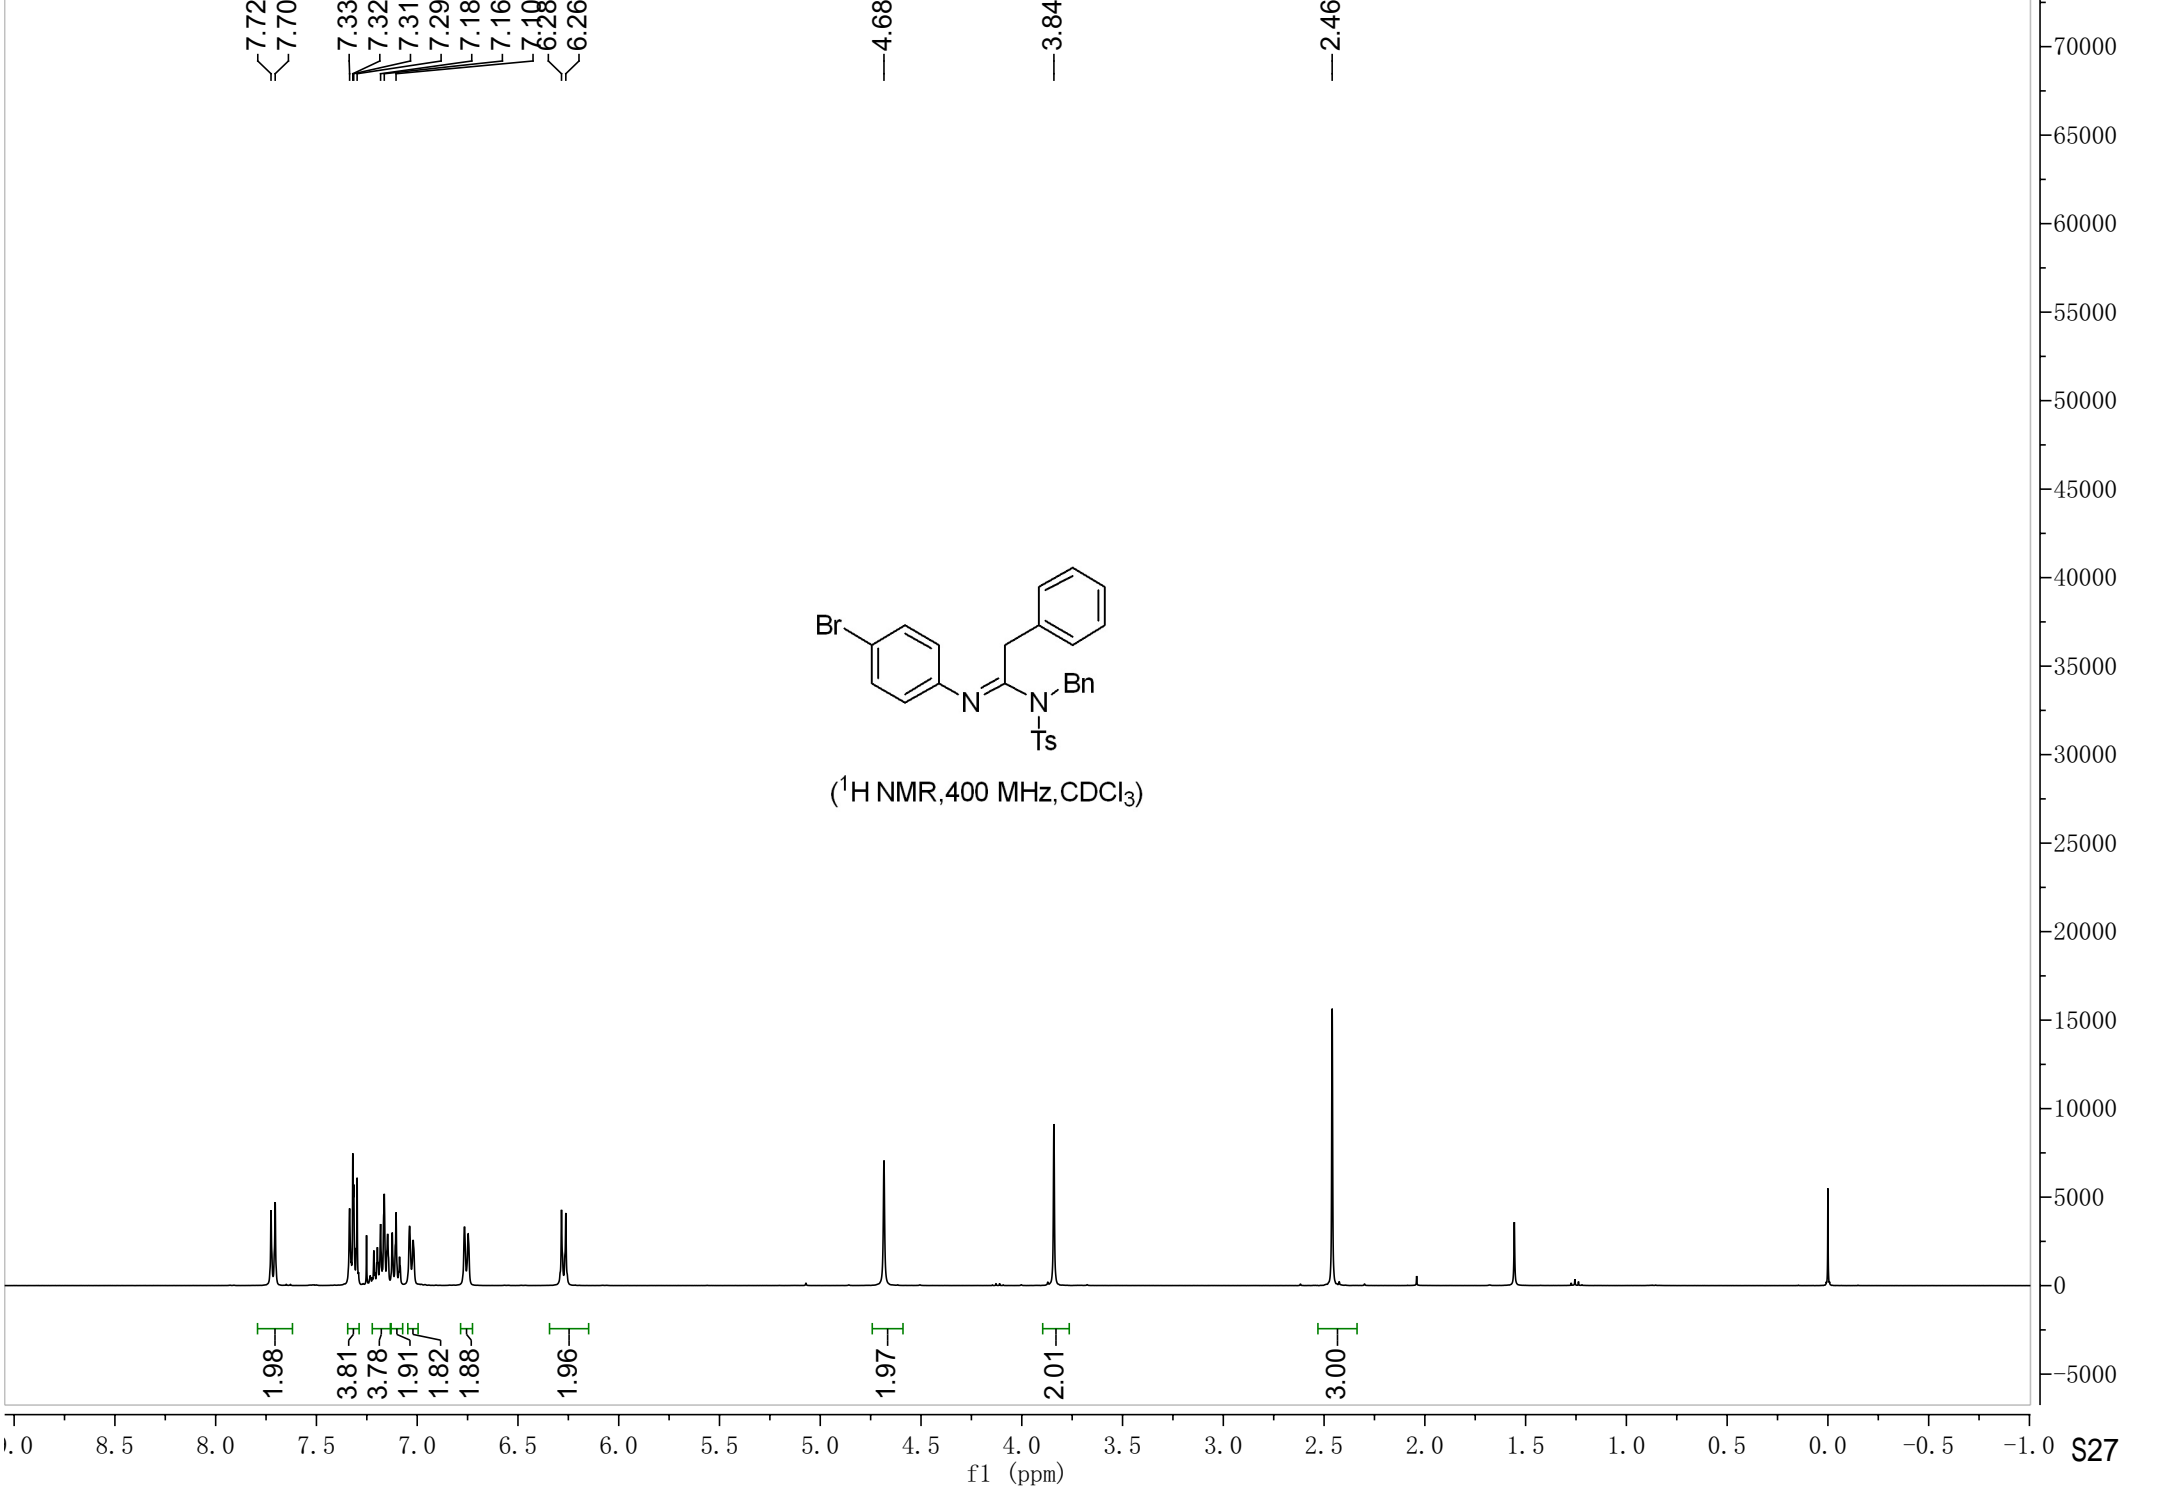

NMR spectra of compound 3ja

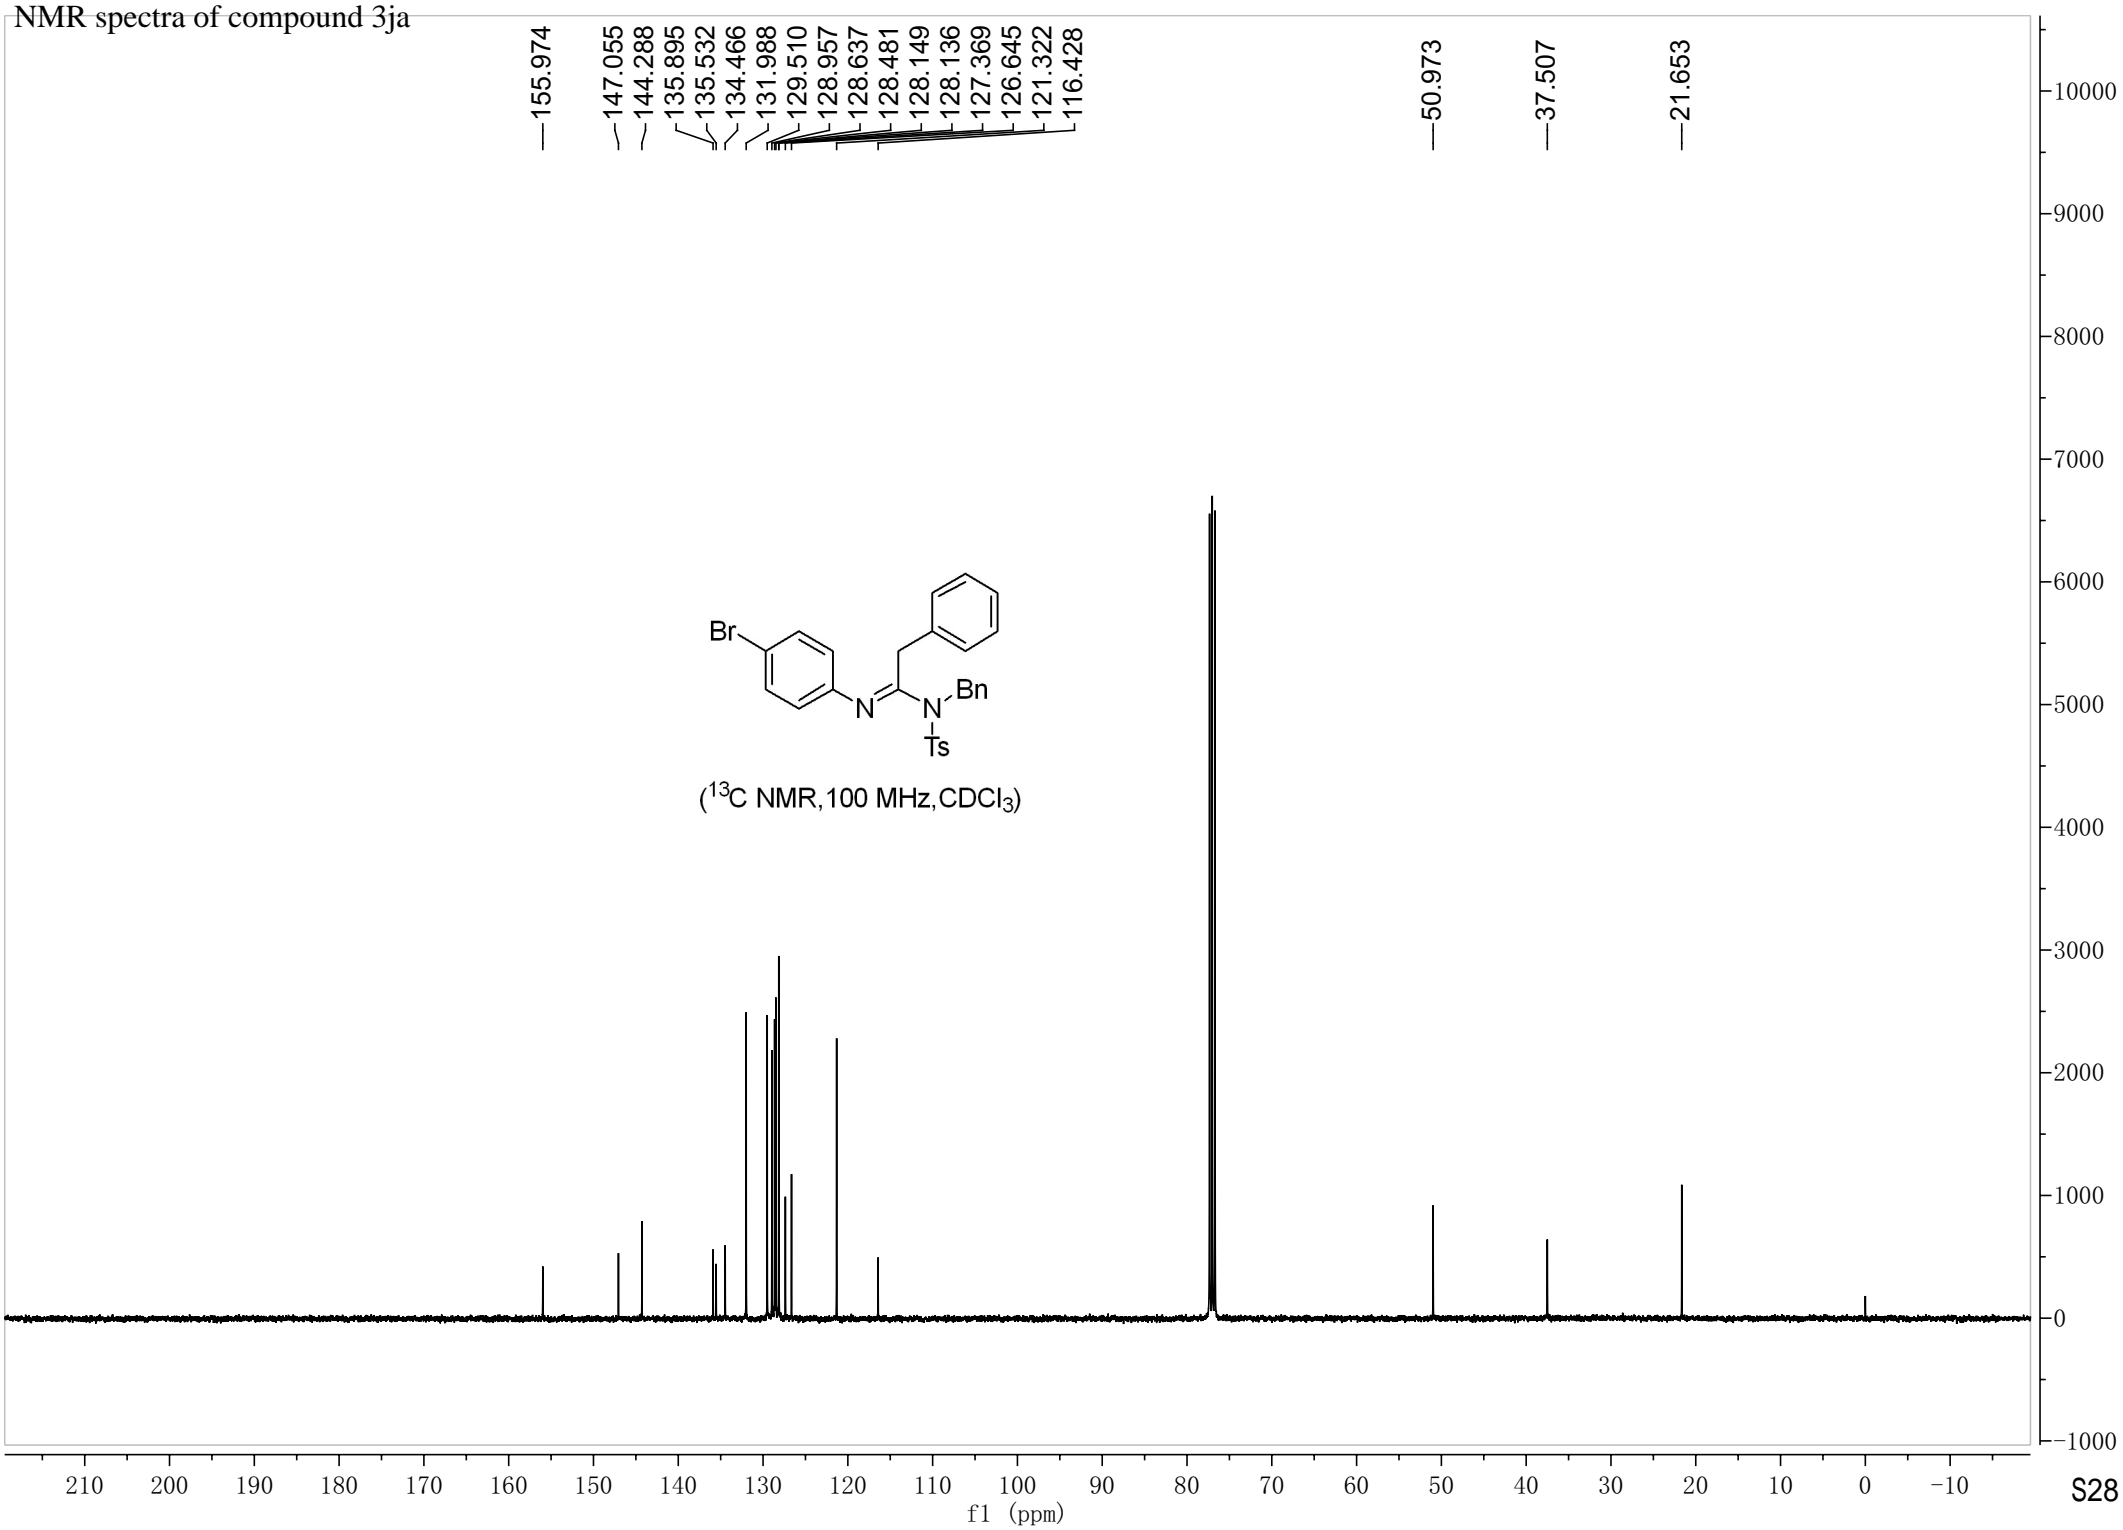



NMR spectra of compound 3ka

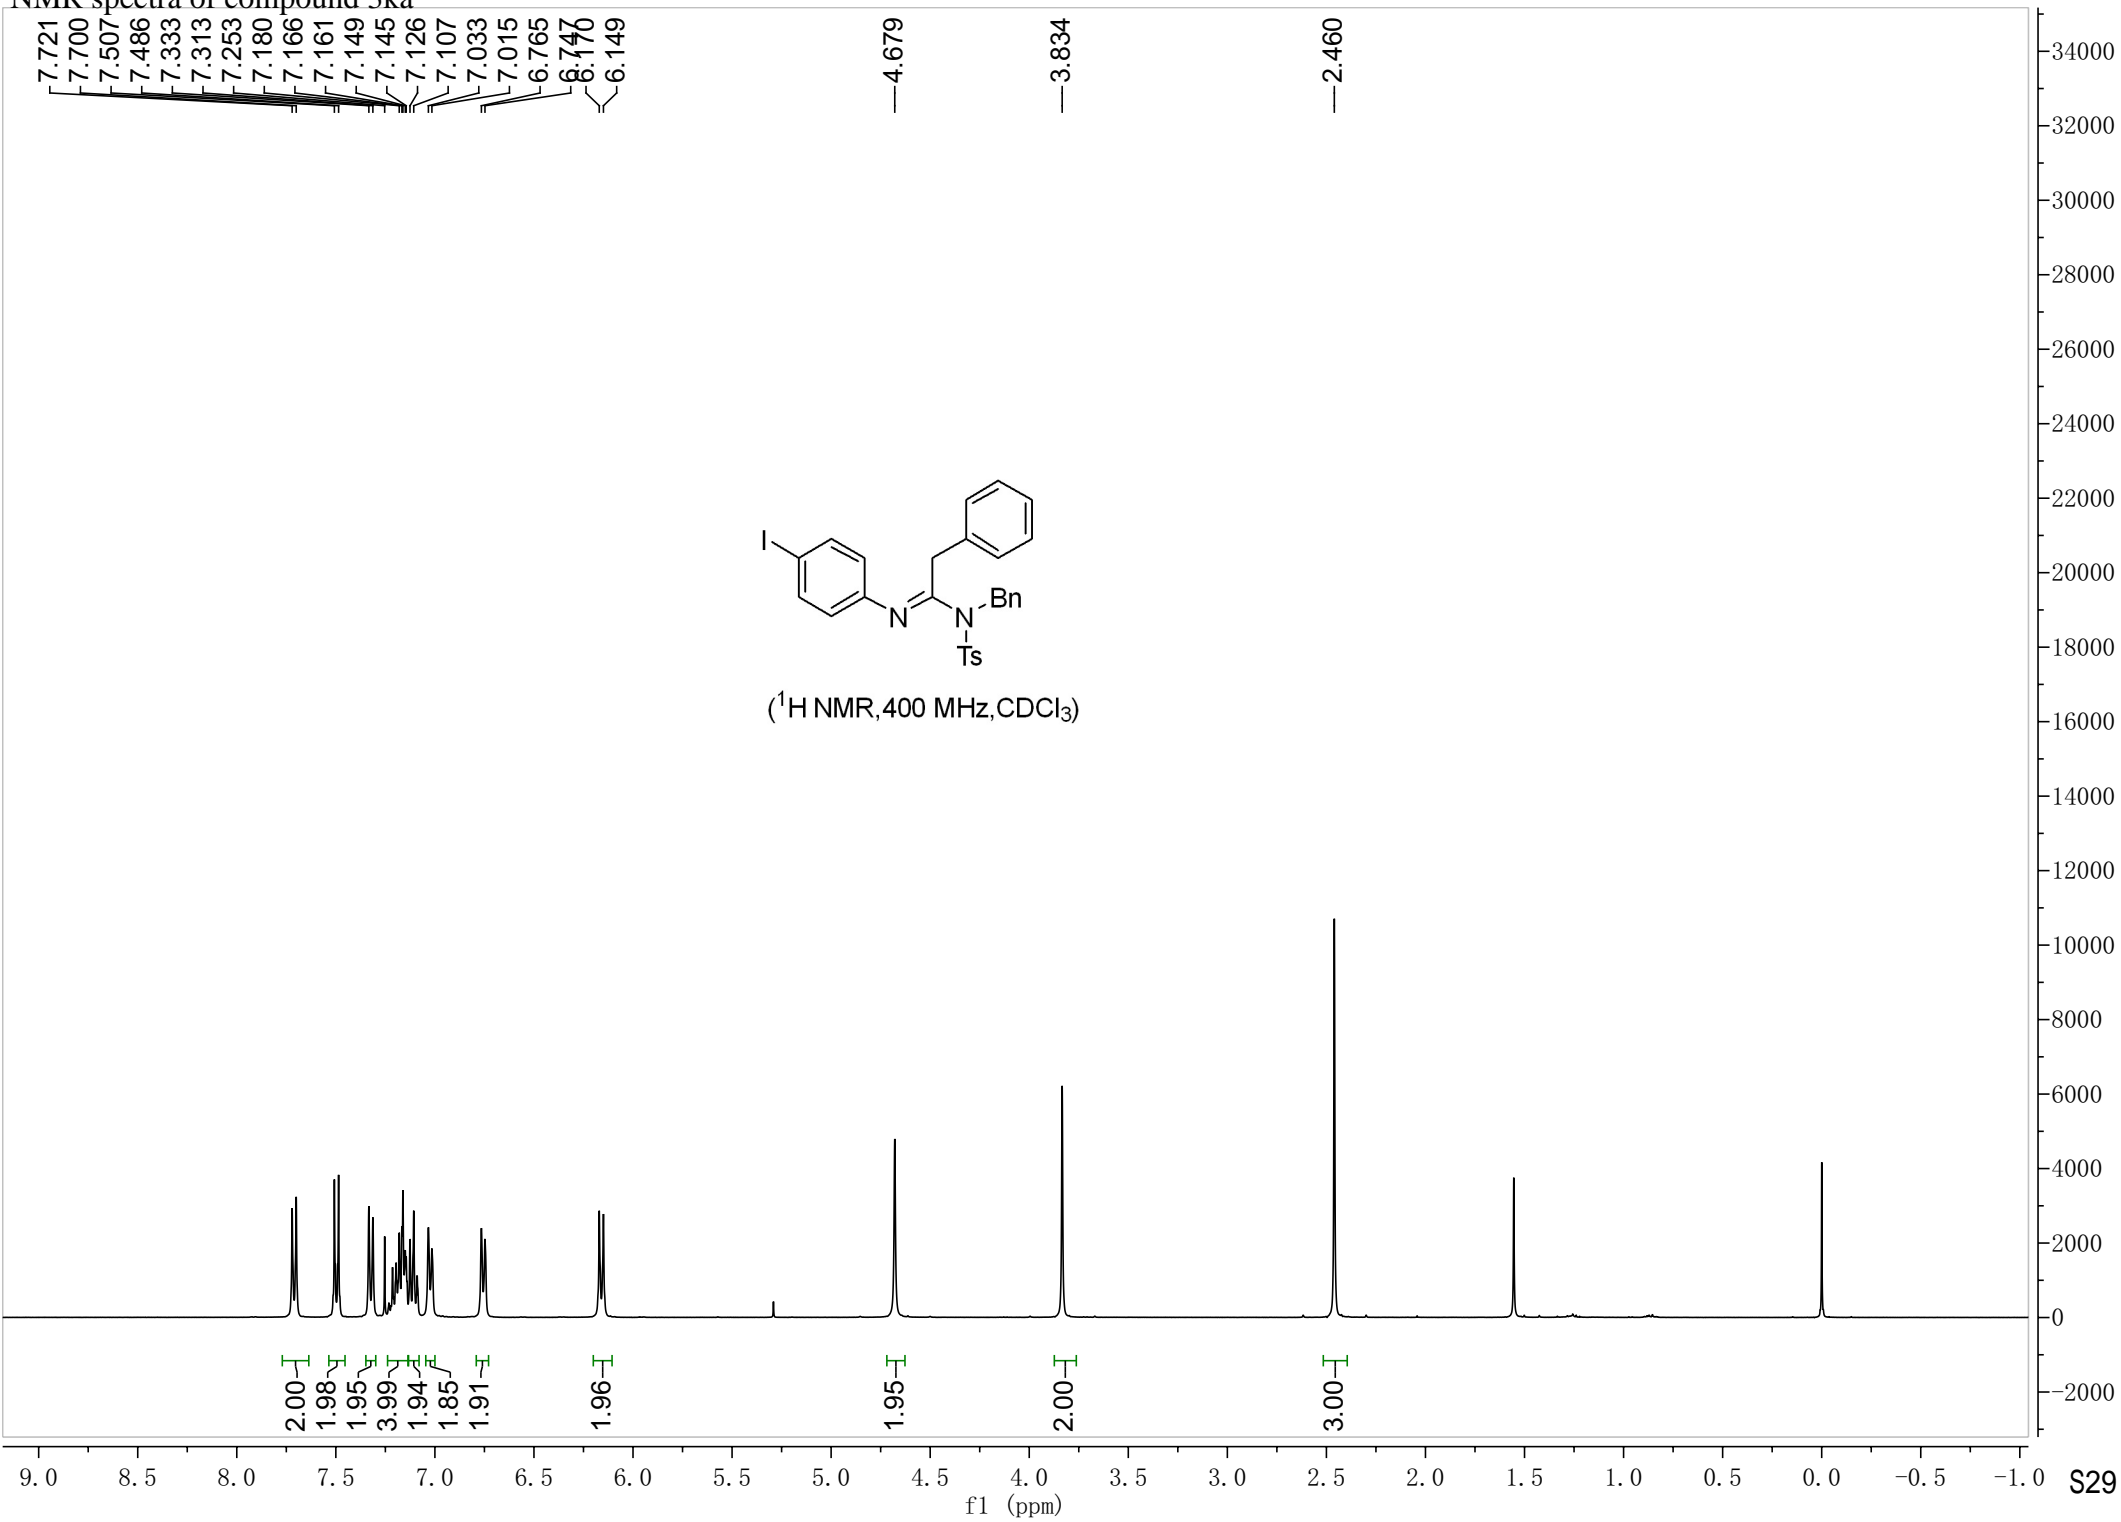

NMR spectra of compound 3ka

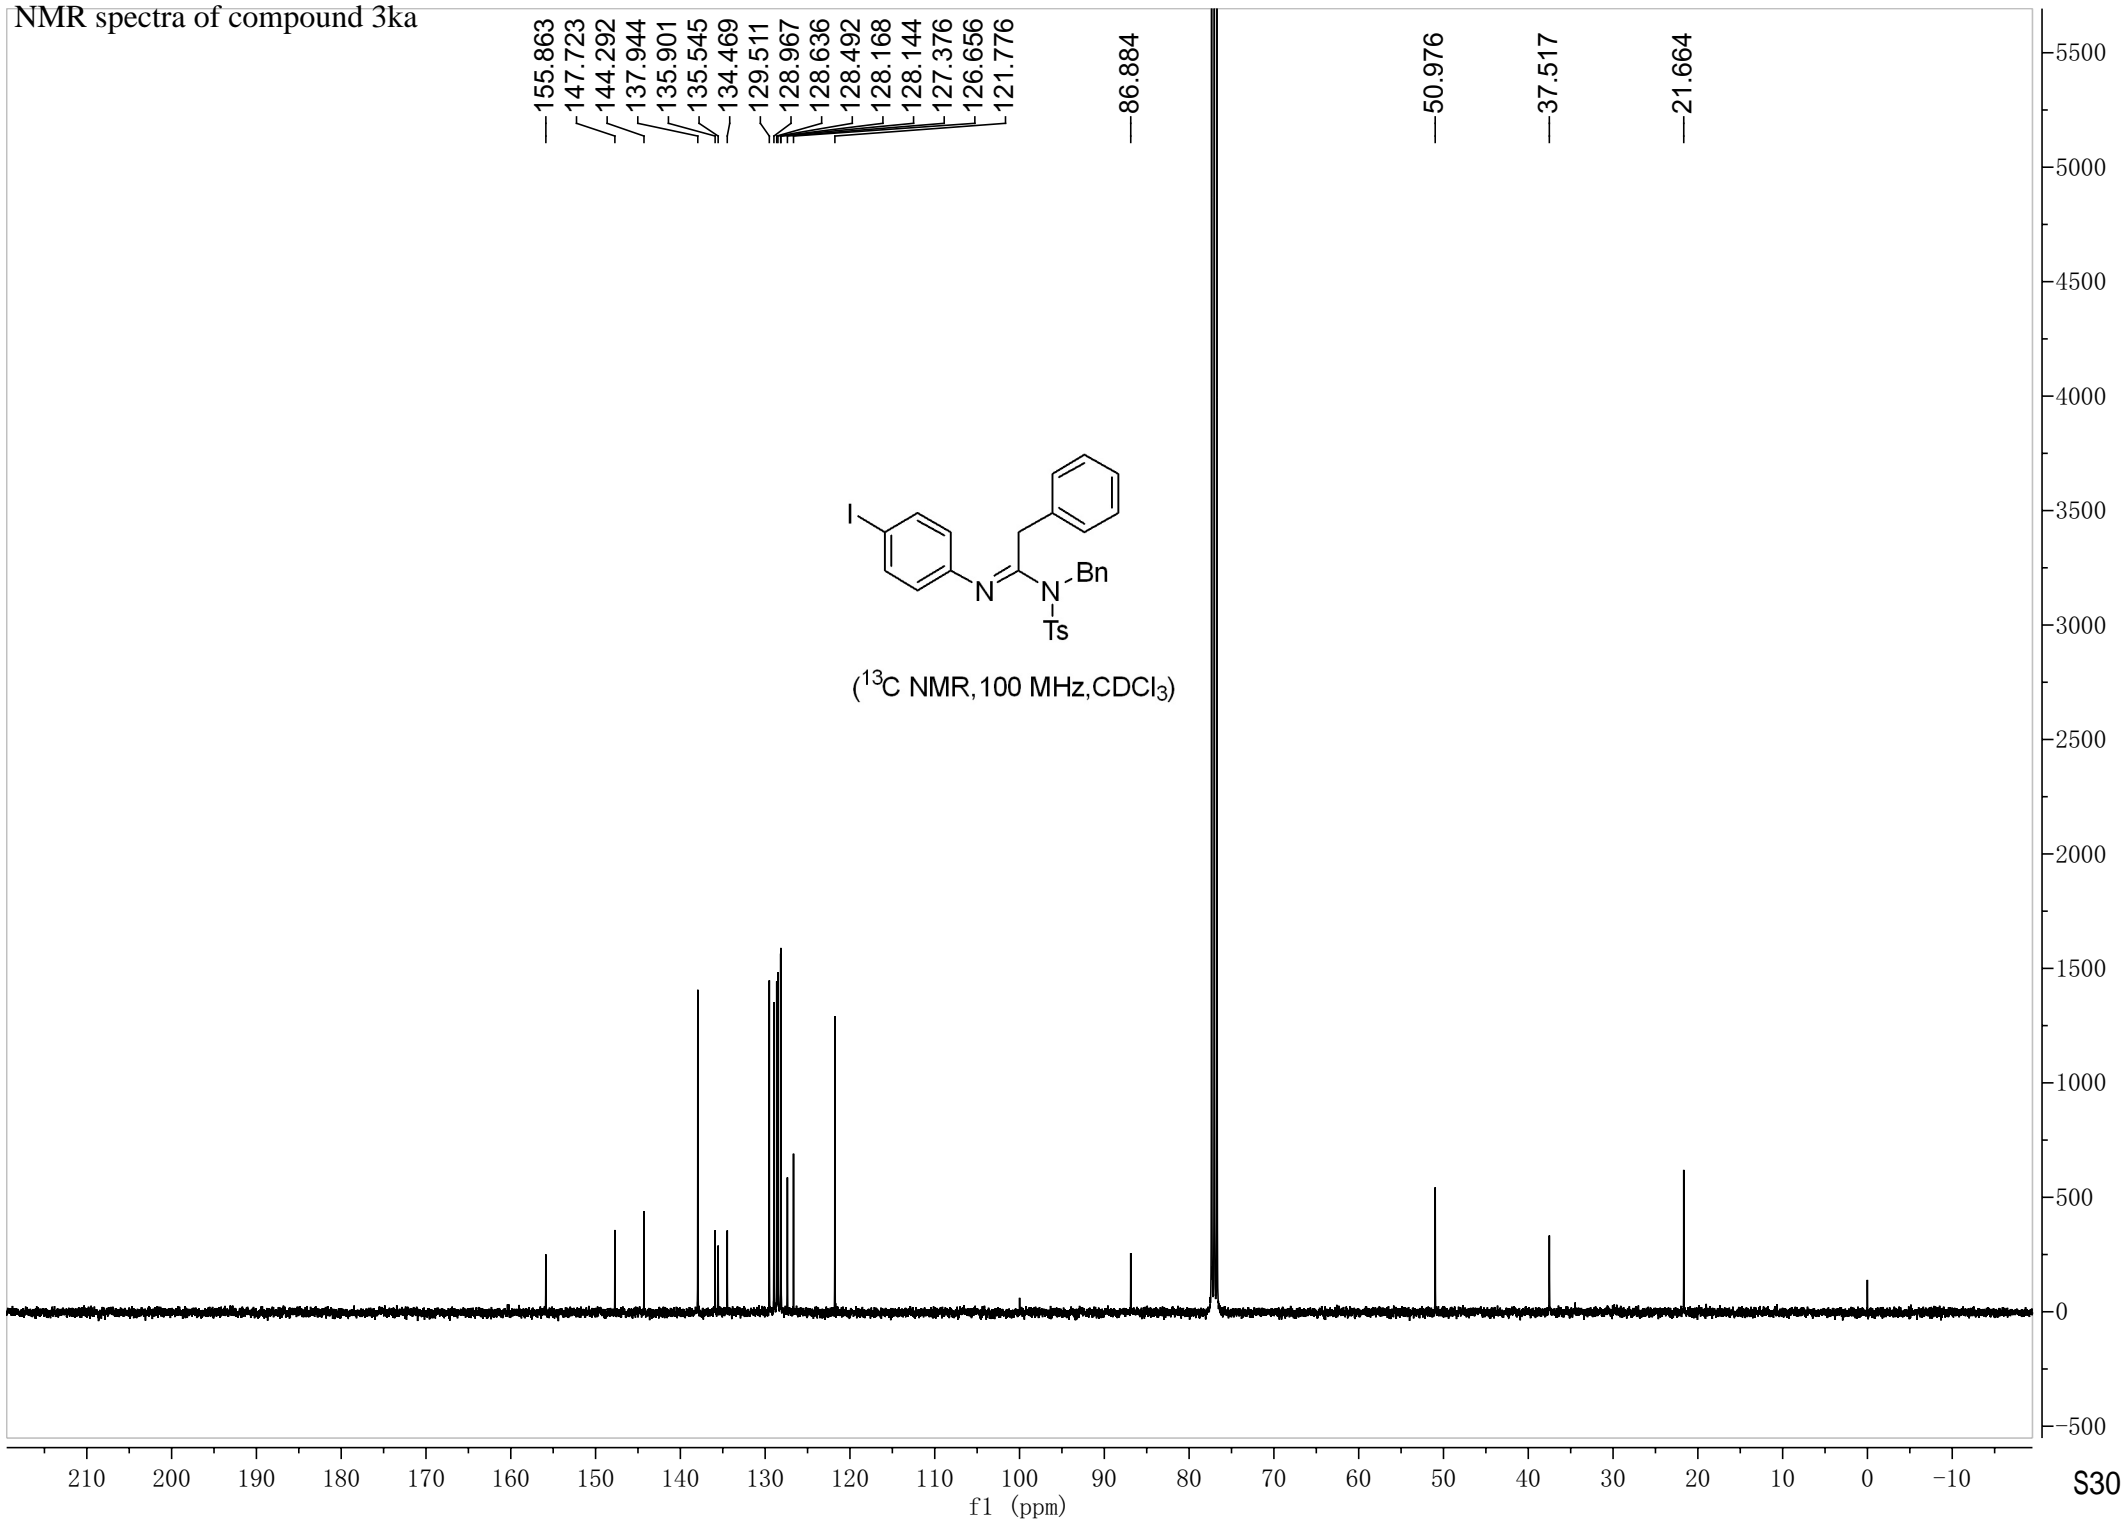

NMR spectra of compound 3la

7.742  
7.721  
7.335  
7.147  
7.128  
7.084  
7.039  
7.018  
6.913  
6.947  
6.327

4.641

3.879

2.451

2.268

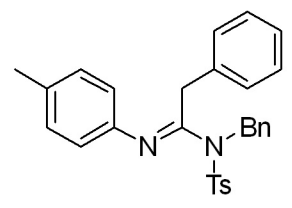

(<sup>1</sup>H NMR, 400 MHz, CDCl<sub>3</sub>)

1.97

1.95

5.83

3.91

1.95

1.97

1.92

2.00

3.01

3.00

8.5 8.0 7.5 7.0 6.5 6.0 5.5 5.0 4.5 4.0 3.5 3.0 2.5 2.0 1.5 1.0 0.5 0.0 -0.5 -1.0

f1 (ppm)

NMR spectra of compound 3la

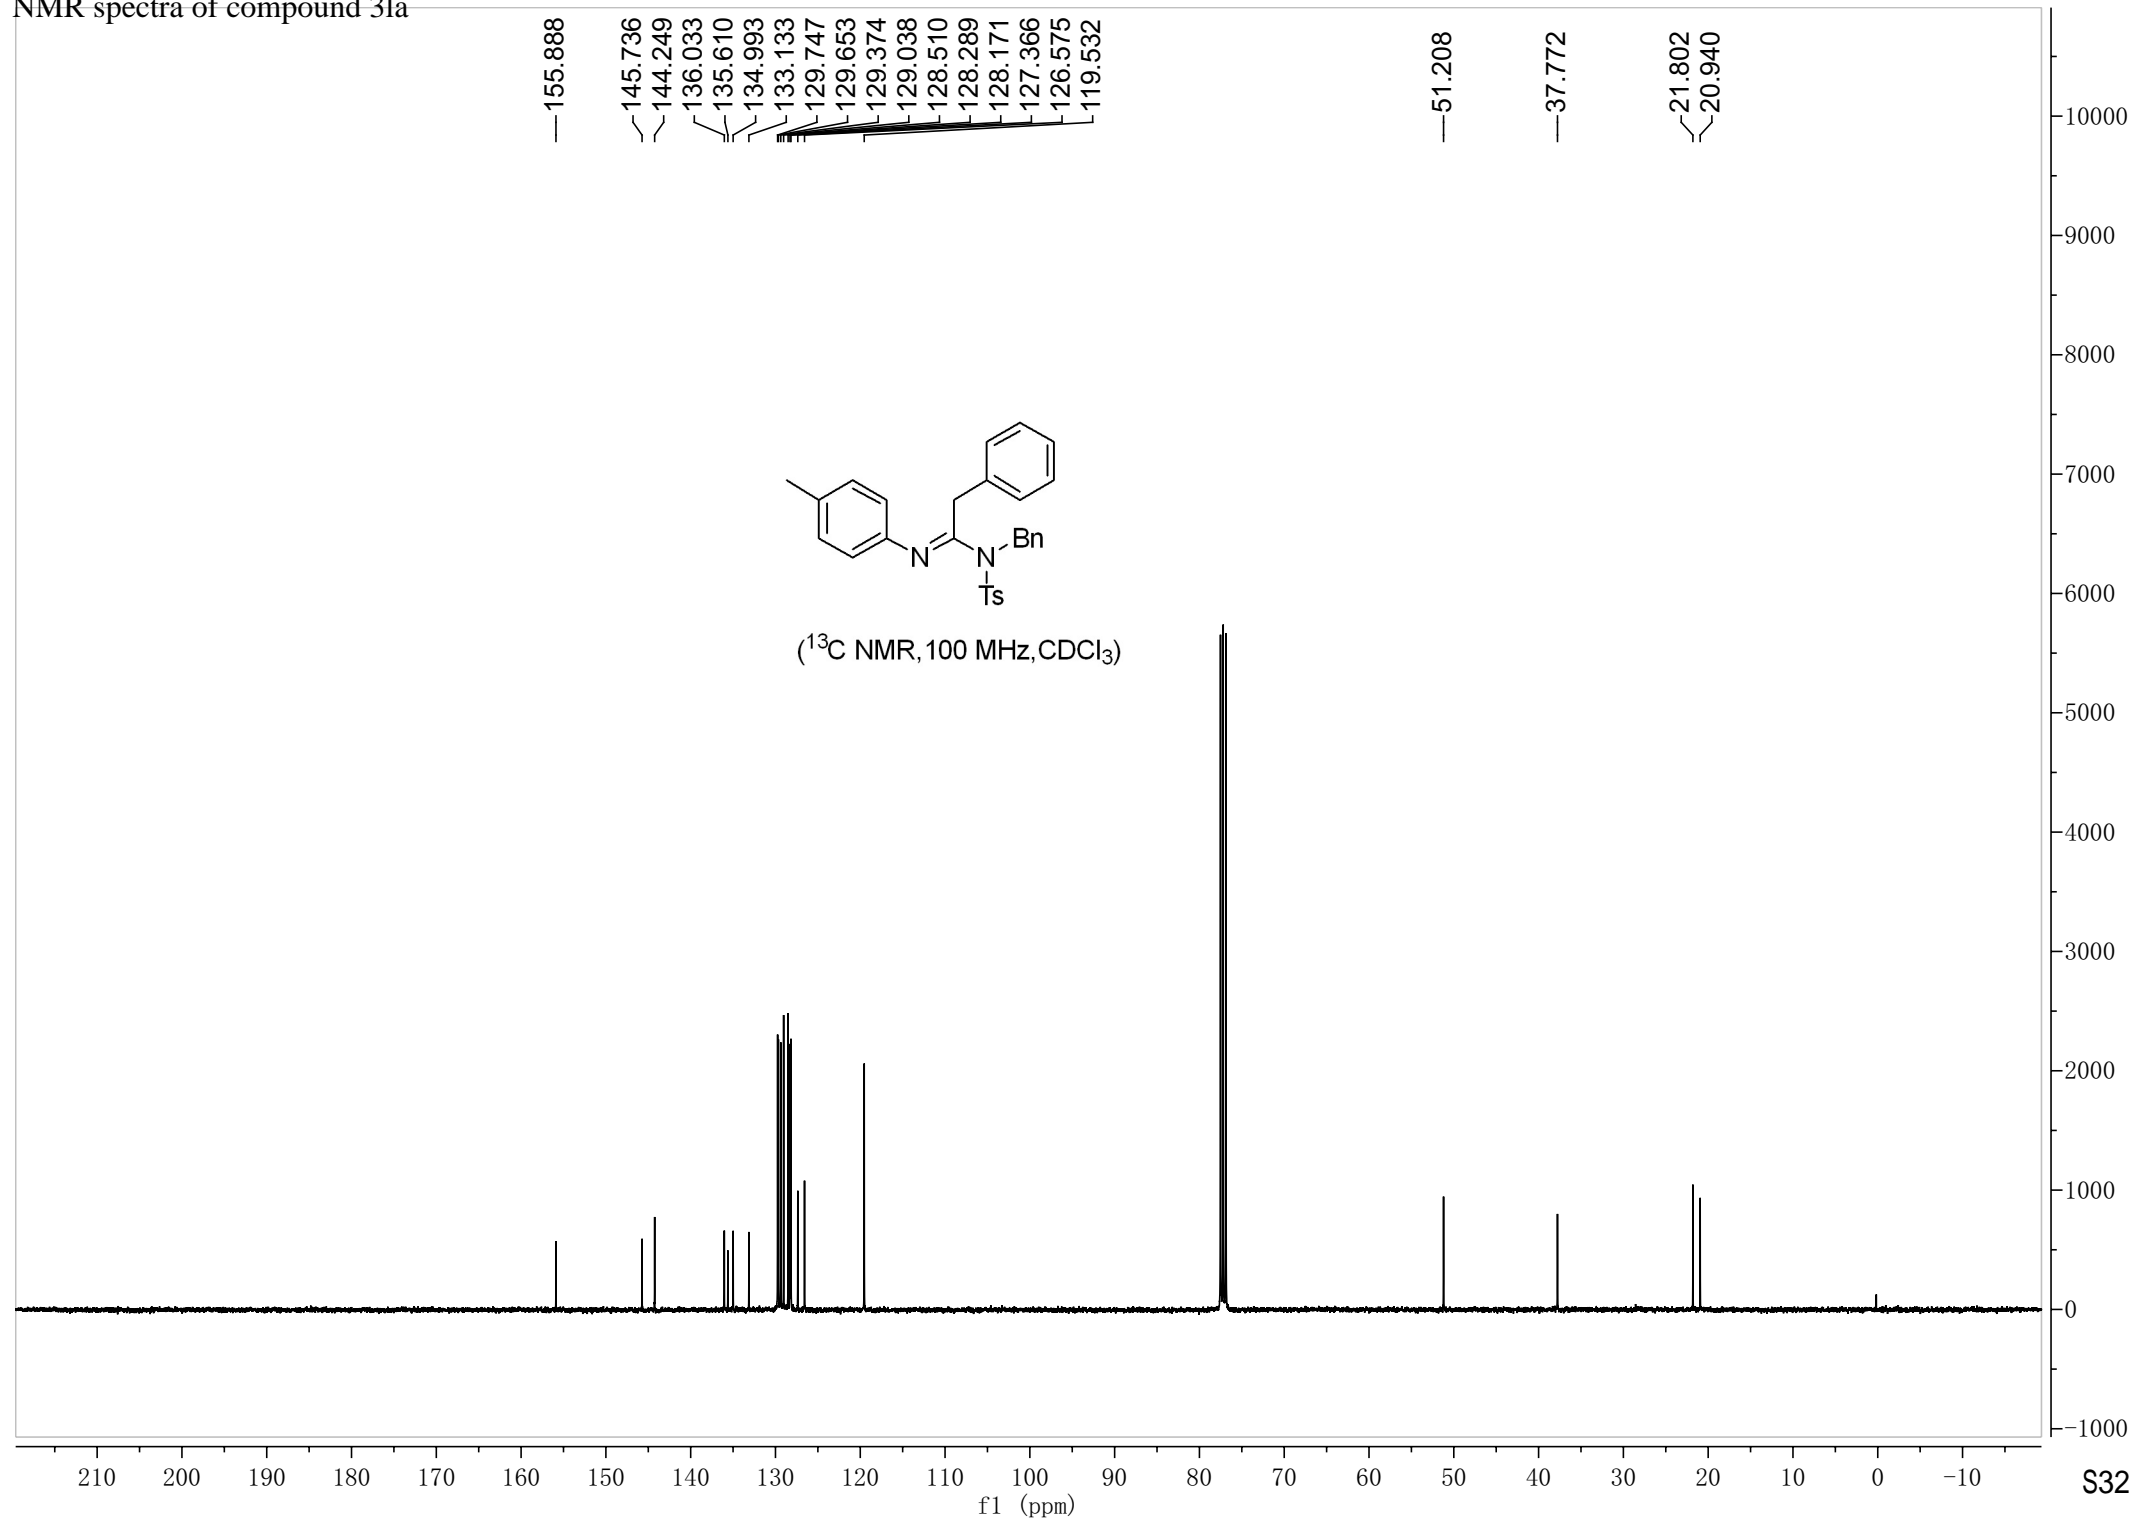

NMR spectra of compound 3ma

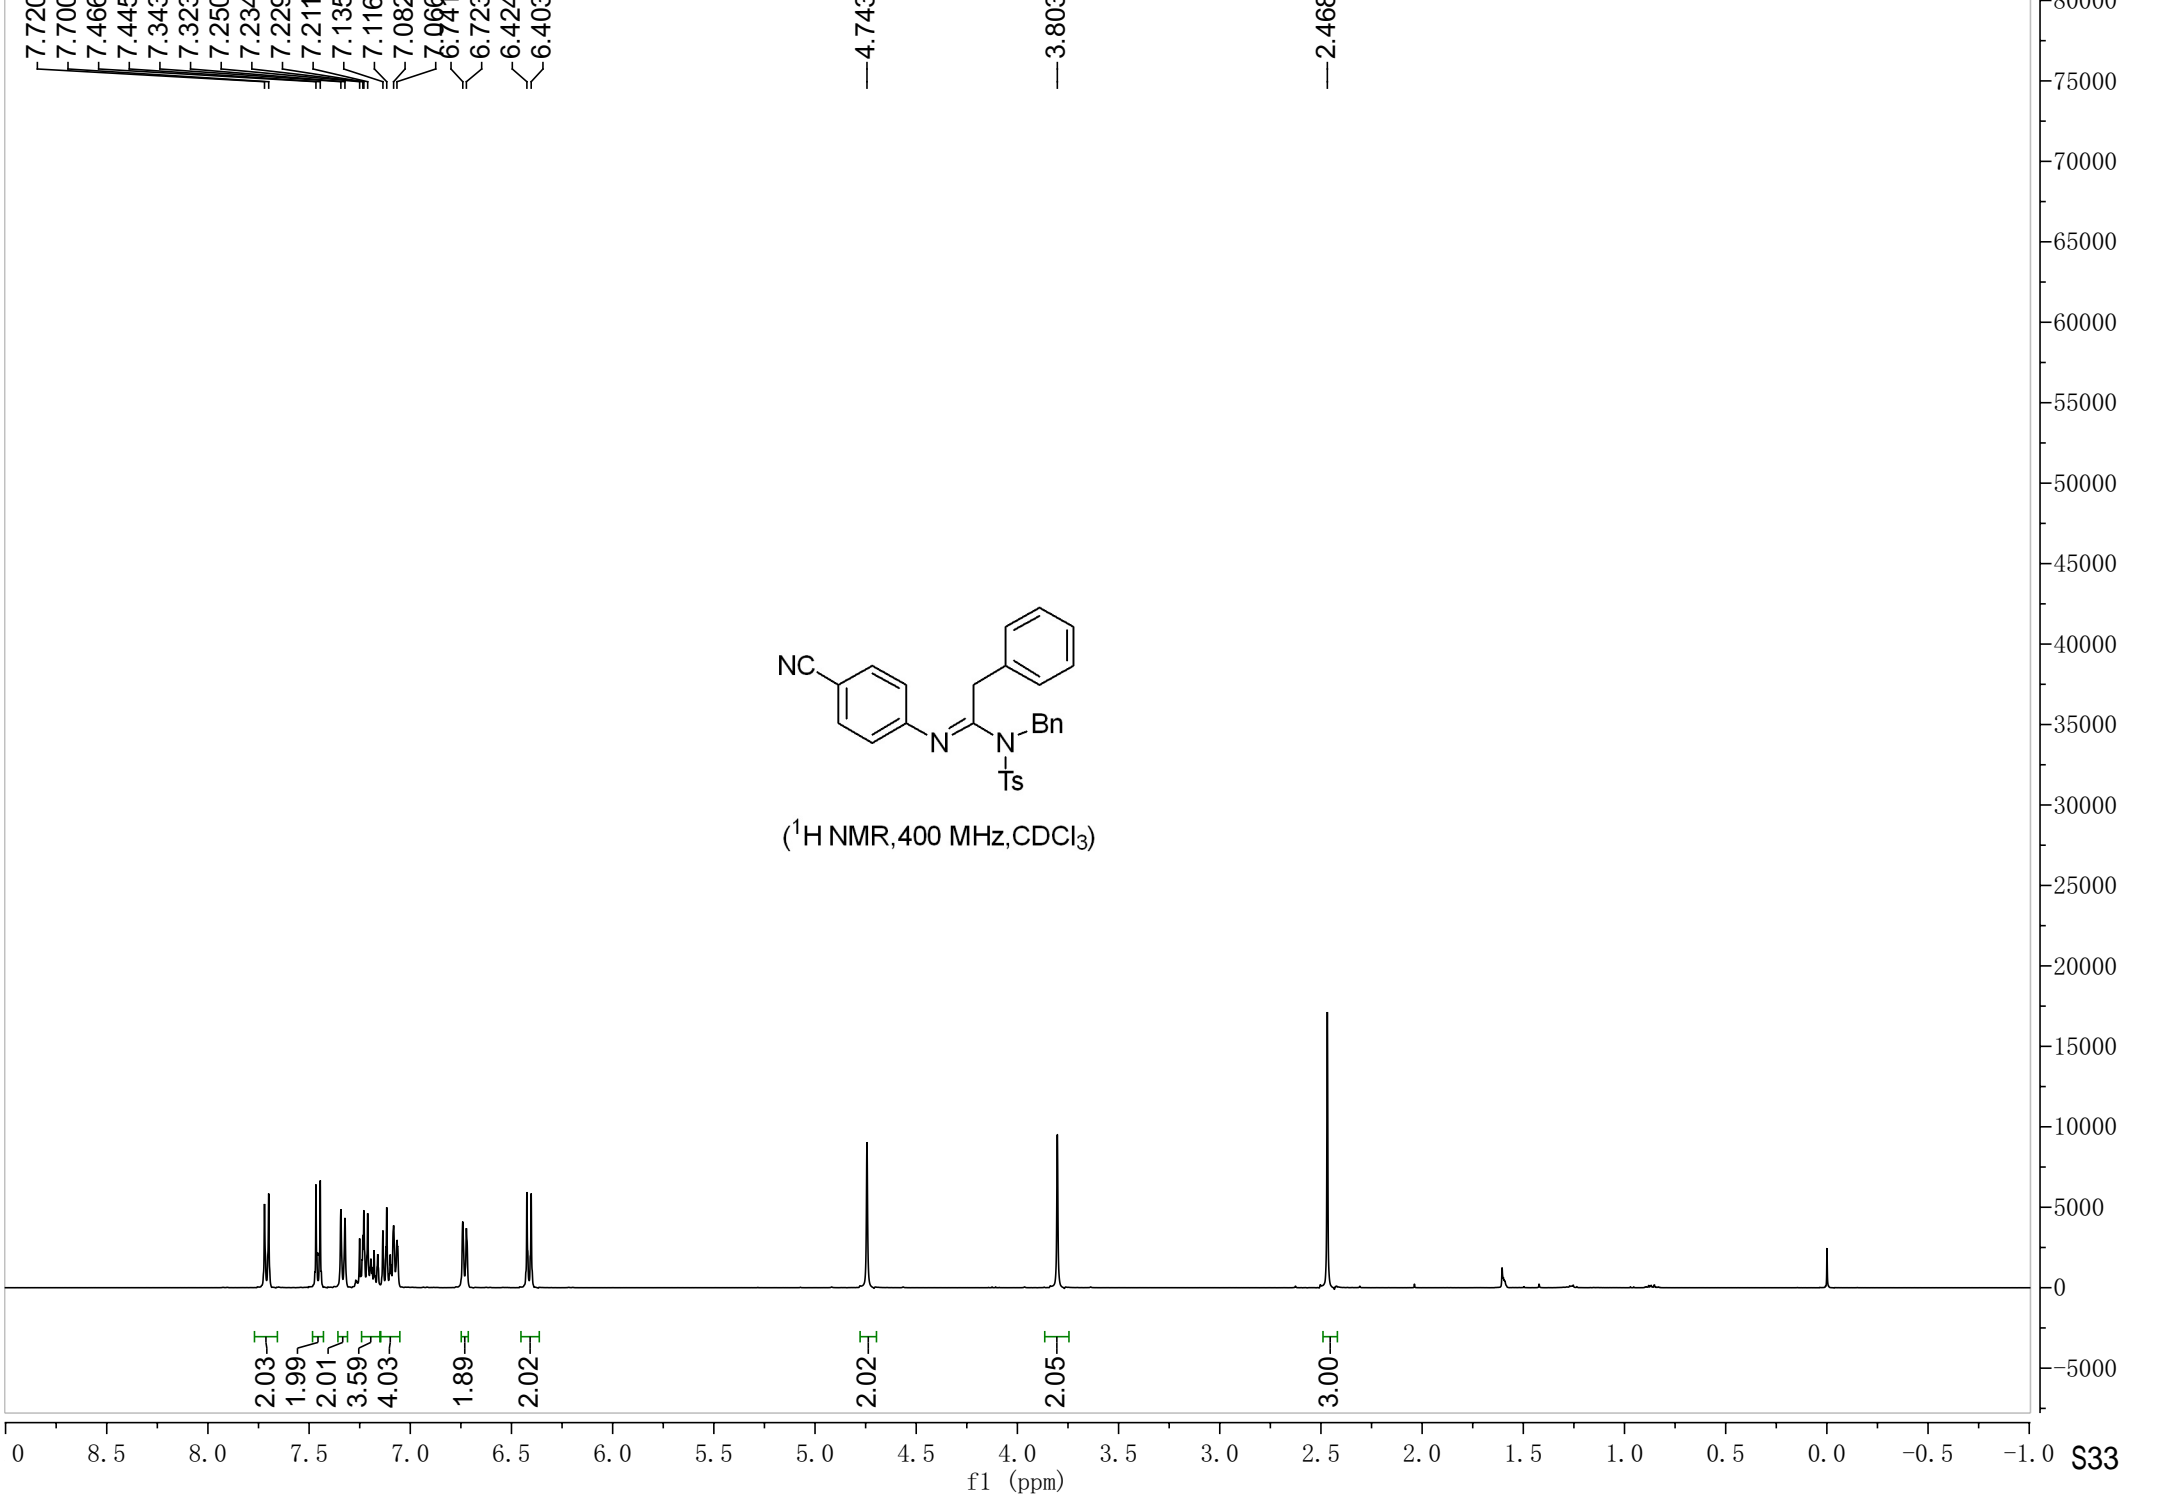

NMR spectra of compound 3ma

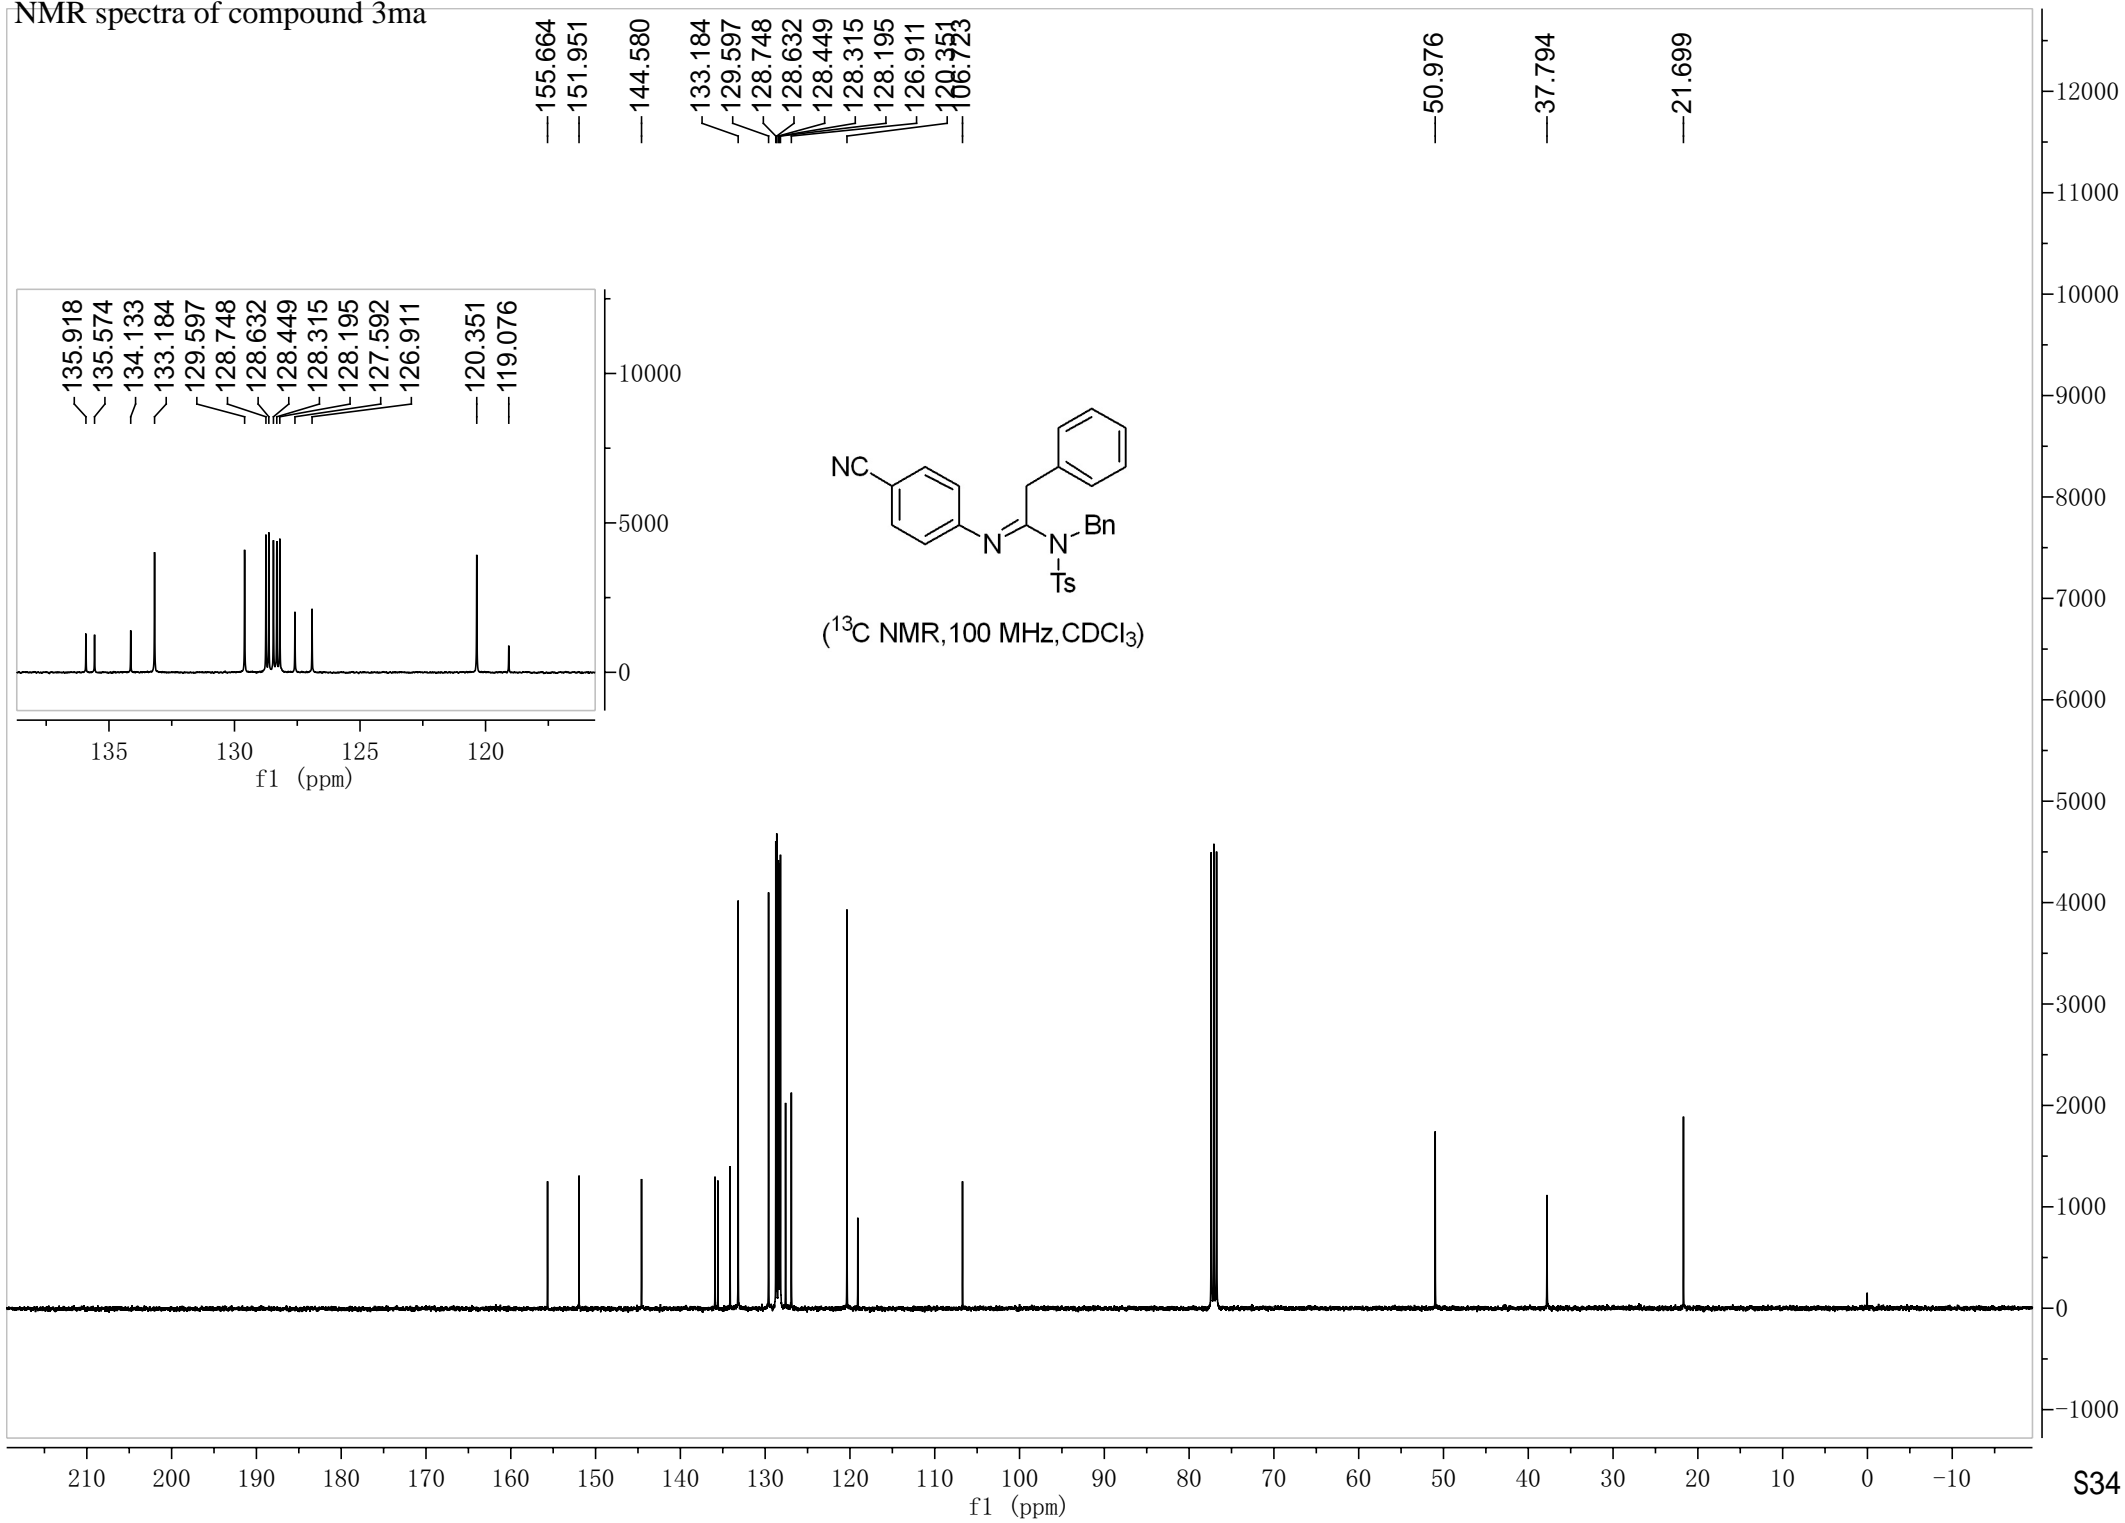

NMR spectra of compound 3na

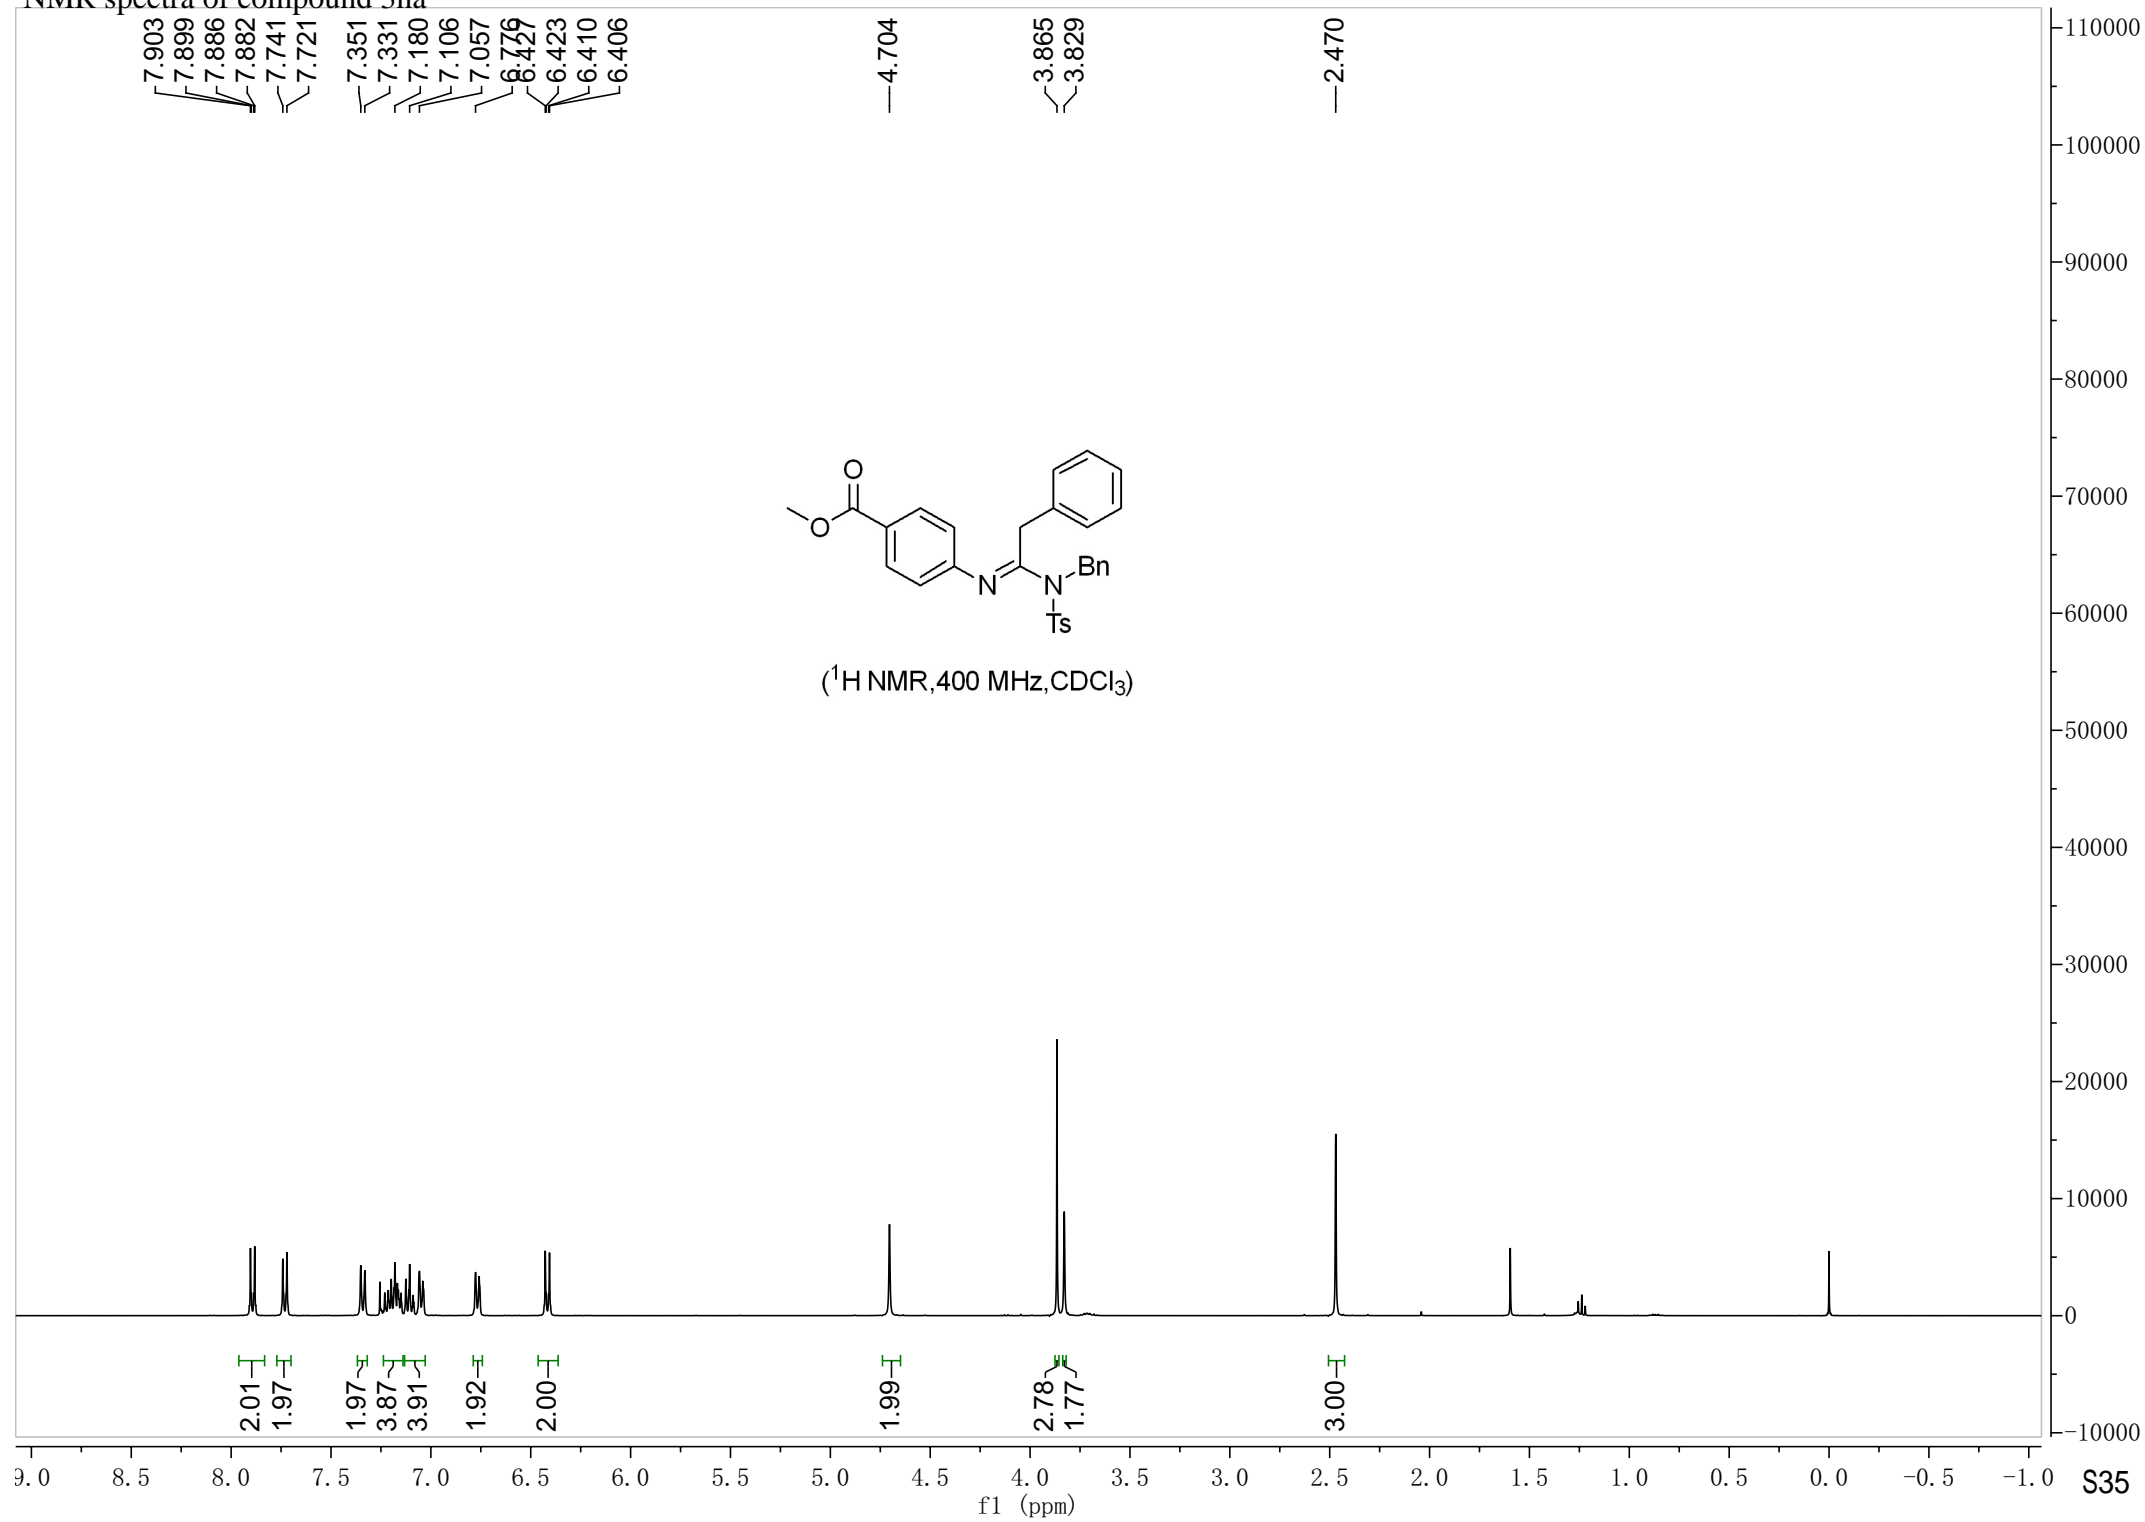

NMR spectra of compound 3na

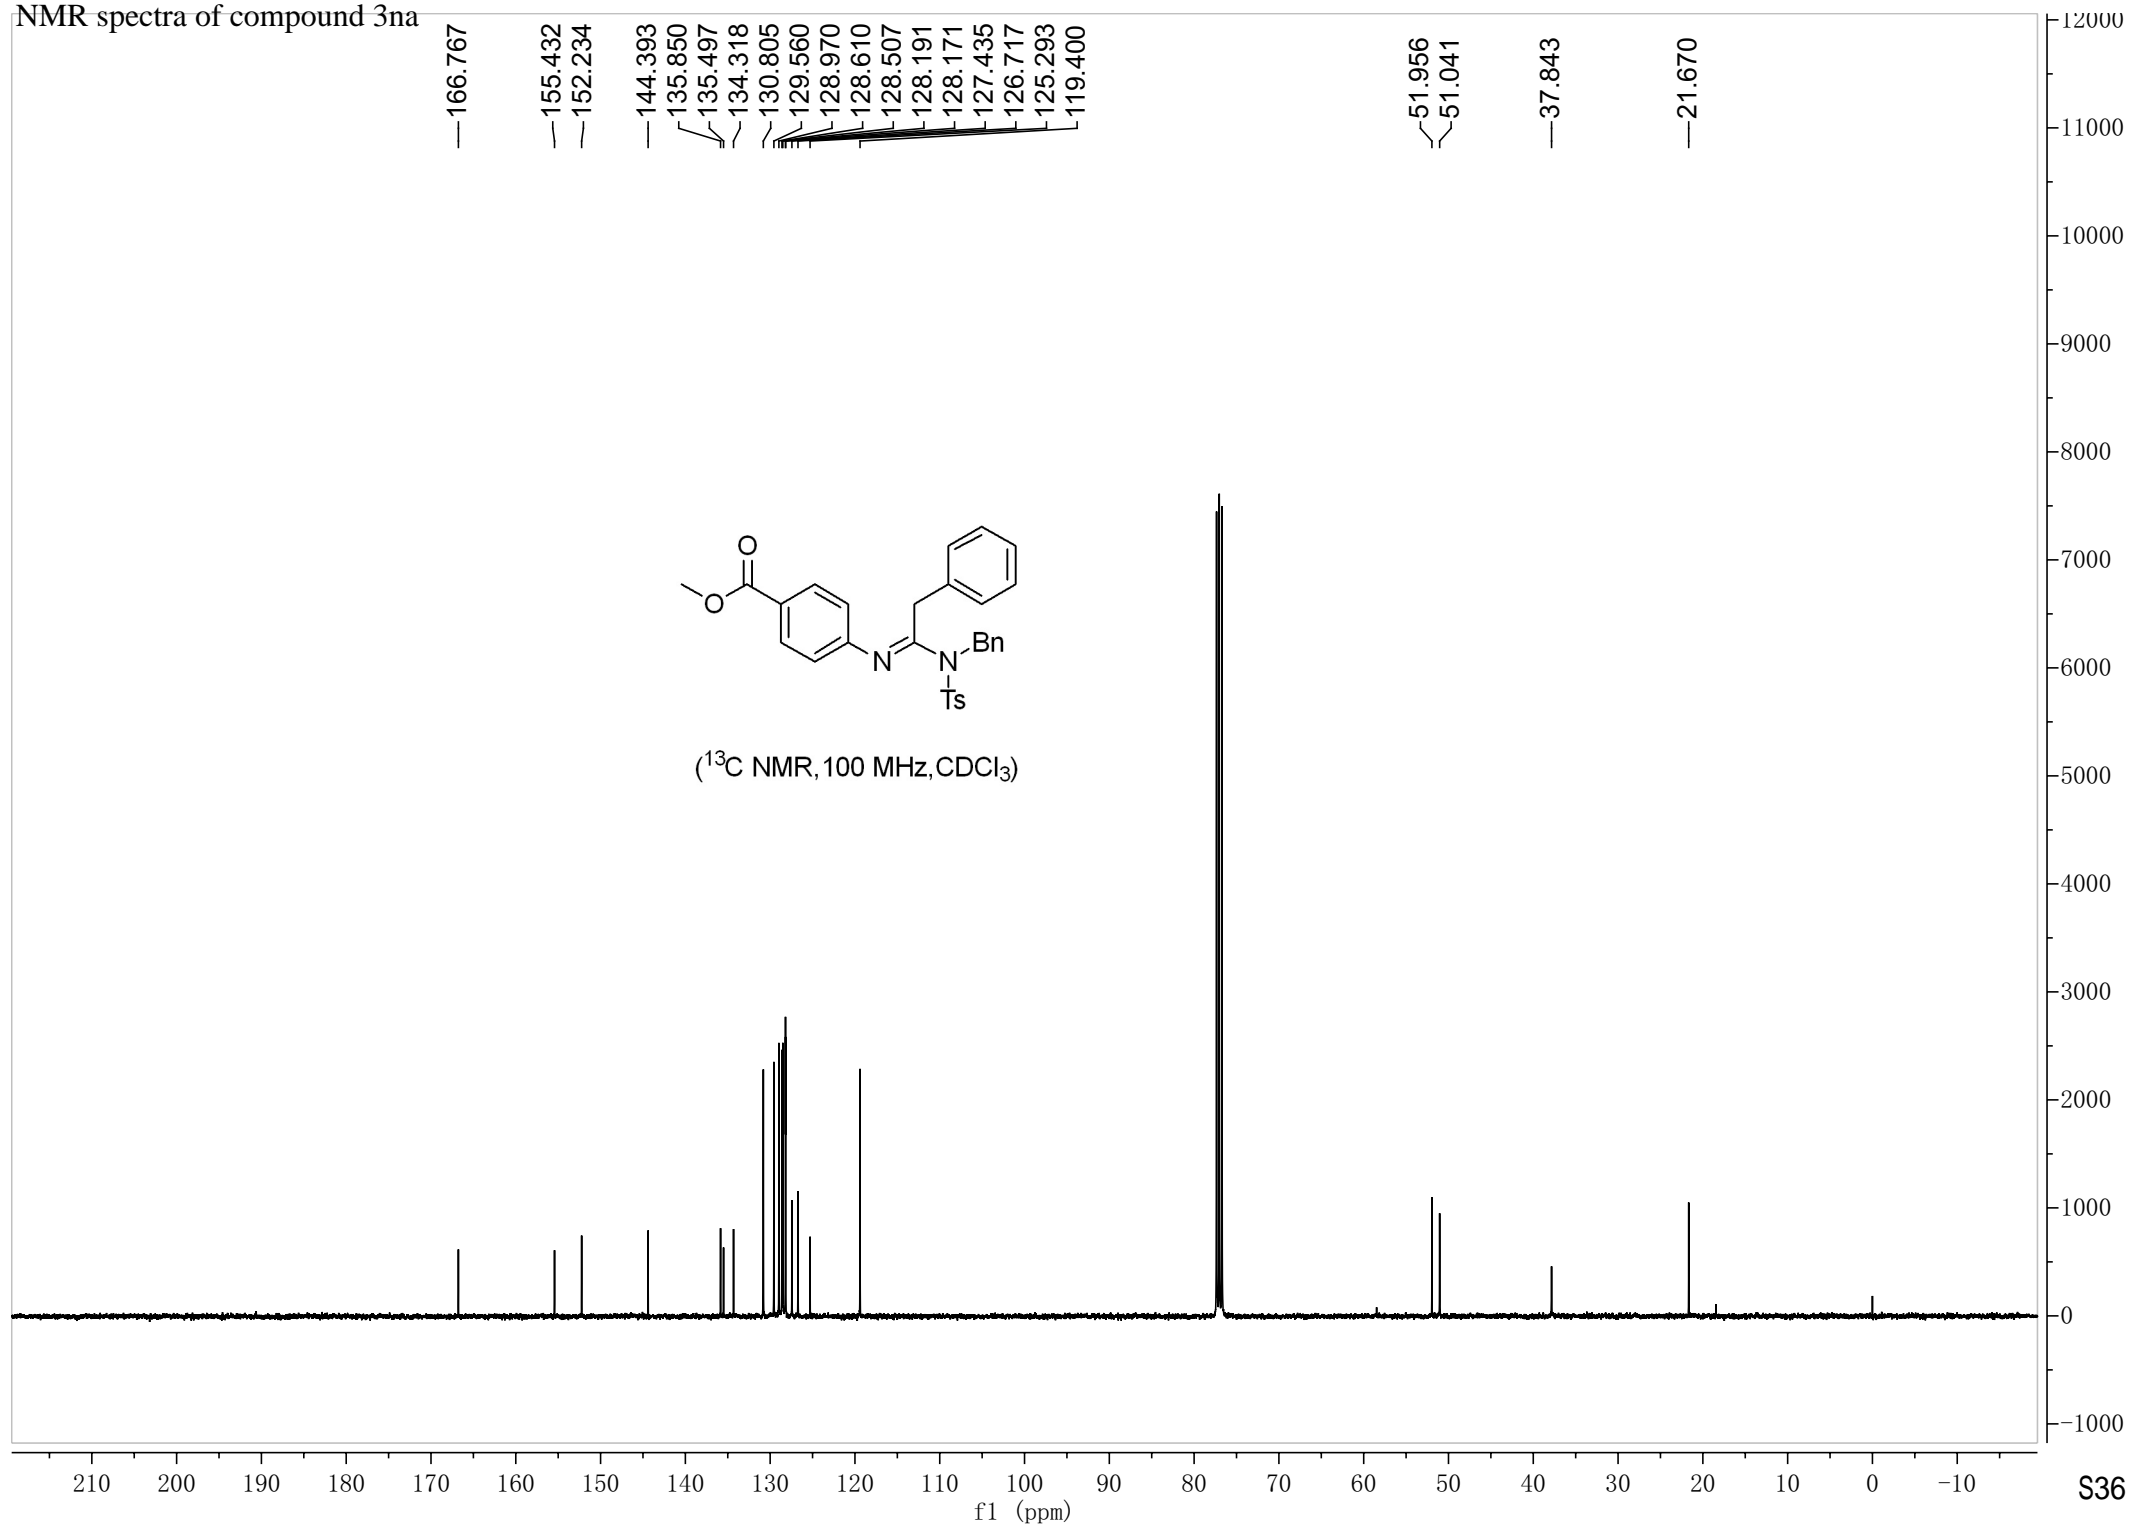



NMR spectra of compound 3oa

7.844  
7.823  
7.306  
7.286  
7.170  
7.154  
7.131  
7.113  
7.095  
6.840  
6.297  
6.277

4.724  
3.894  
2.993  
2.440

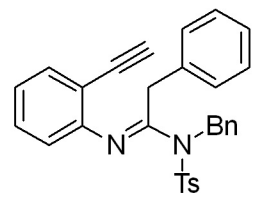

(<sup>1</sup>H NMR, 400 MHz, CDCl<sub>3</sub>)

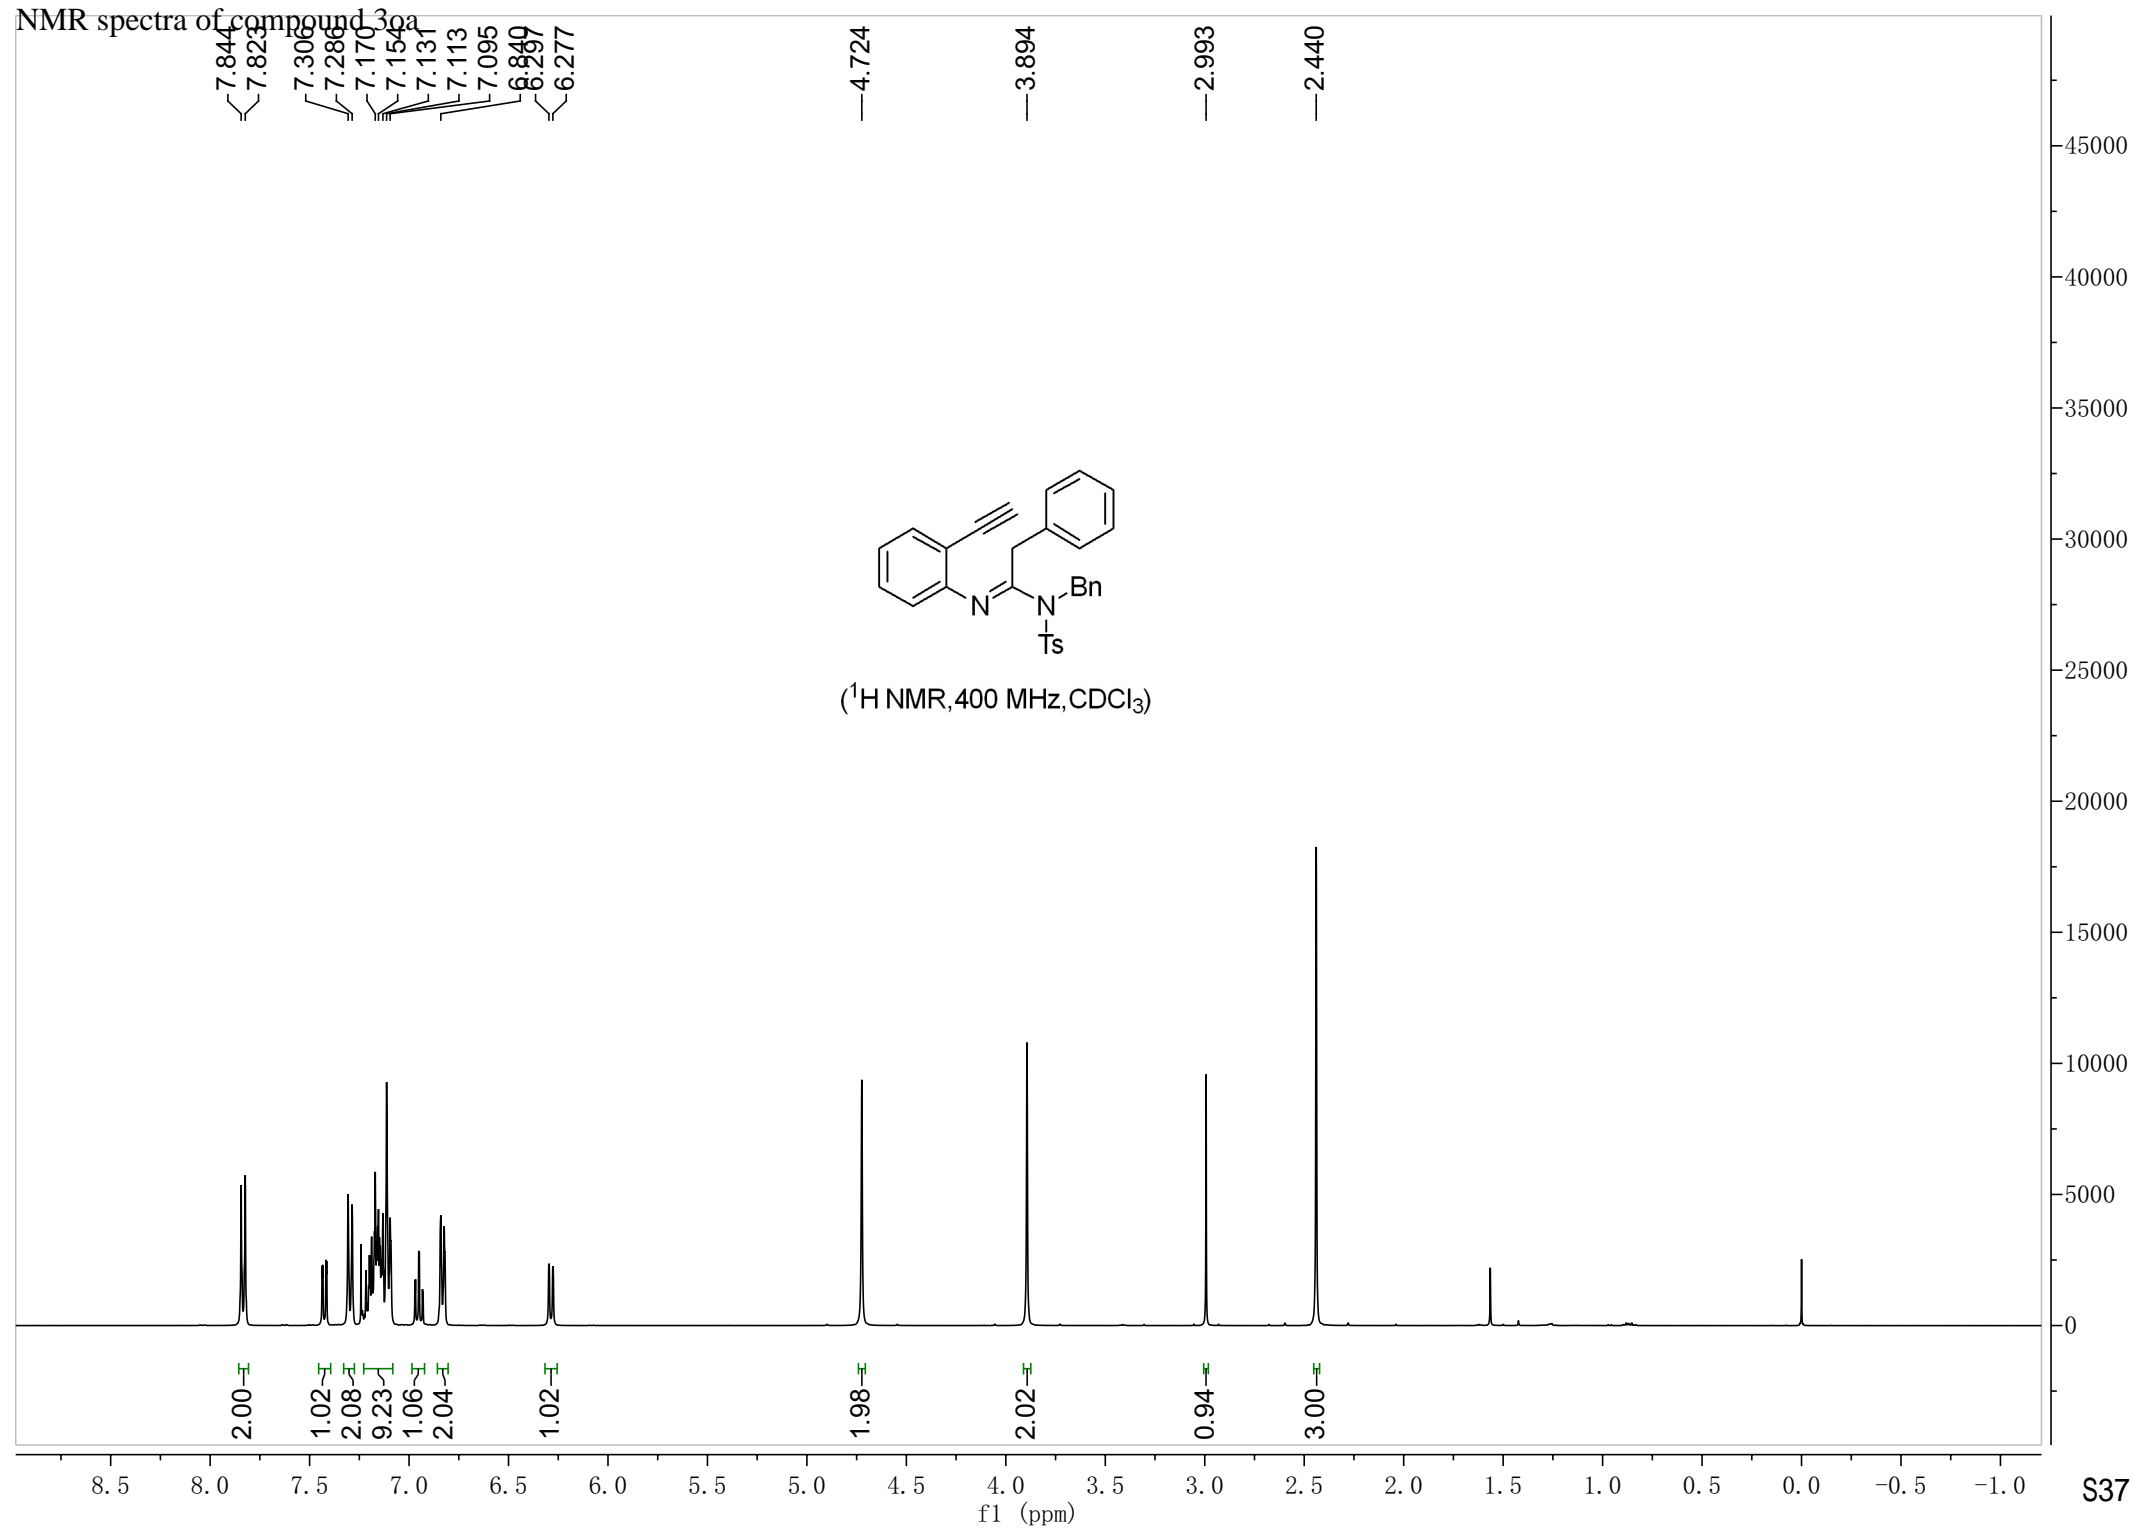

NMR spectra of compound 30a

156.433  
 150.078  
 144.087  
 136.282  
 136.227  
 134.795  
 133.295  
 129.597  
 129.509  
 129.136  
 128.586  
 128.423  
 128.306  
 128.090  
 127.267  
 126.601  
 123.269  
 120.427  
 112.557

81.283  
 81.114  
 50.921  
 38.331  
 21.653

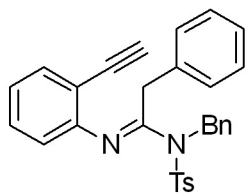

(<sup>13</sup>C NMR, 100 MHz, CDCl<sub>3</sub>)

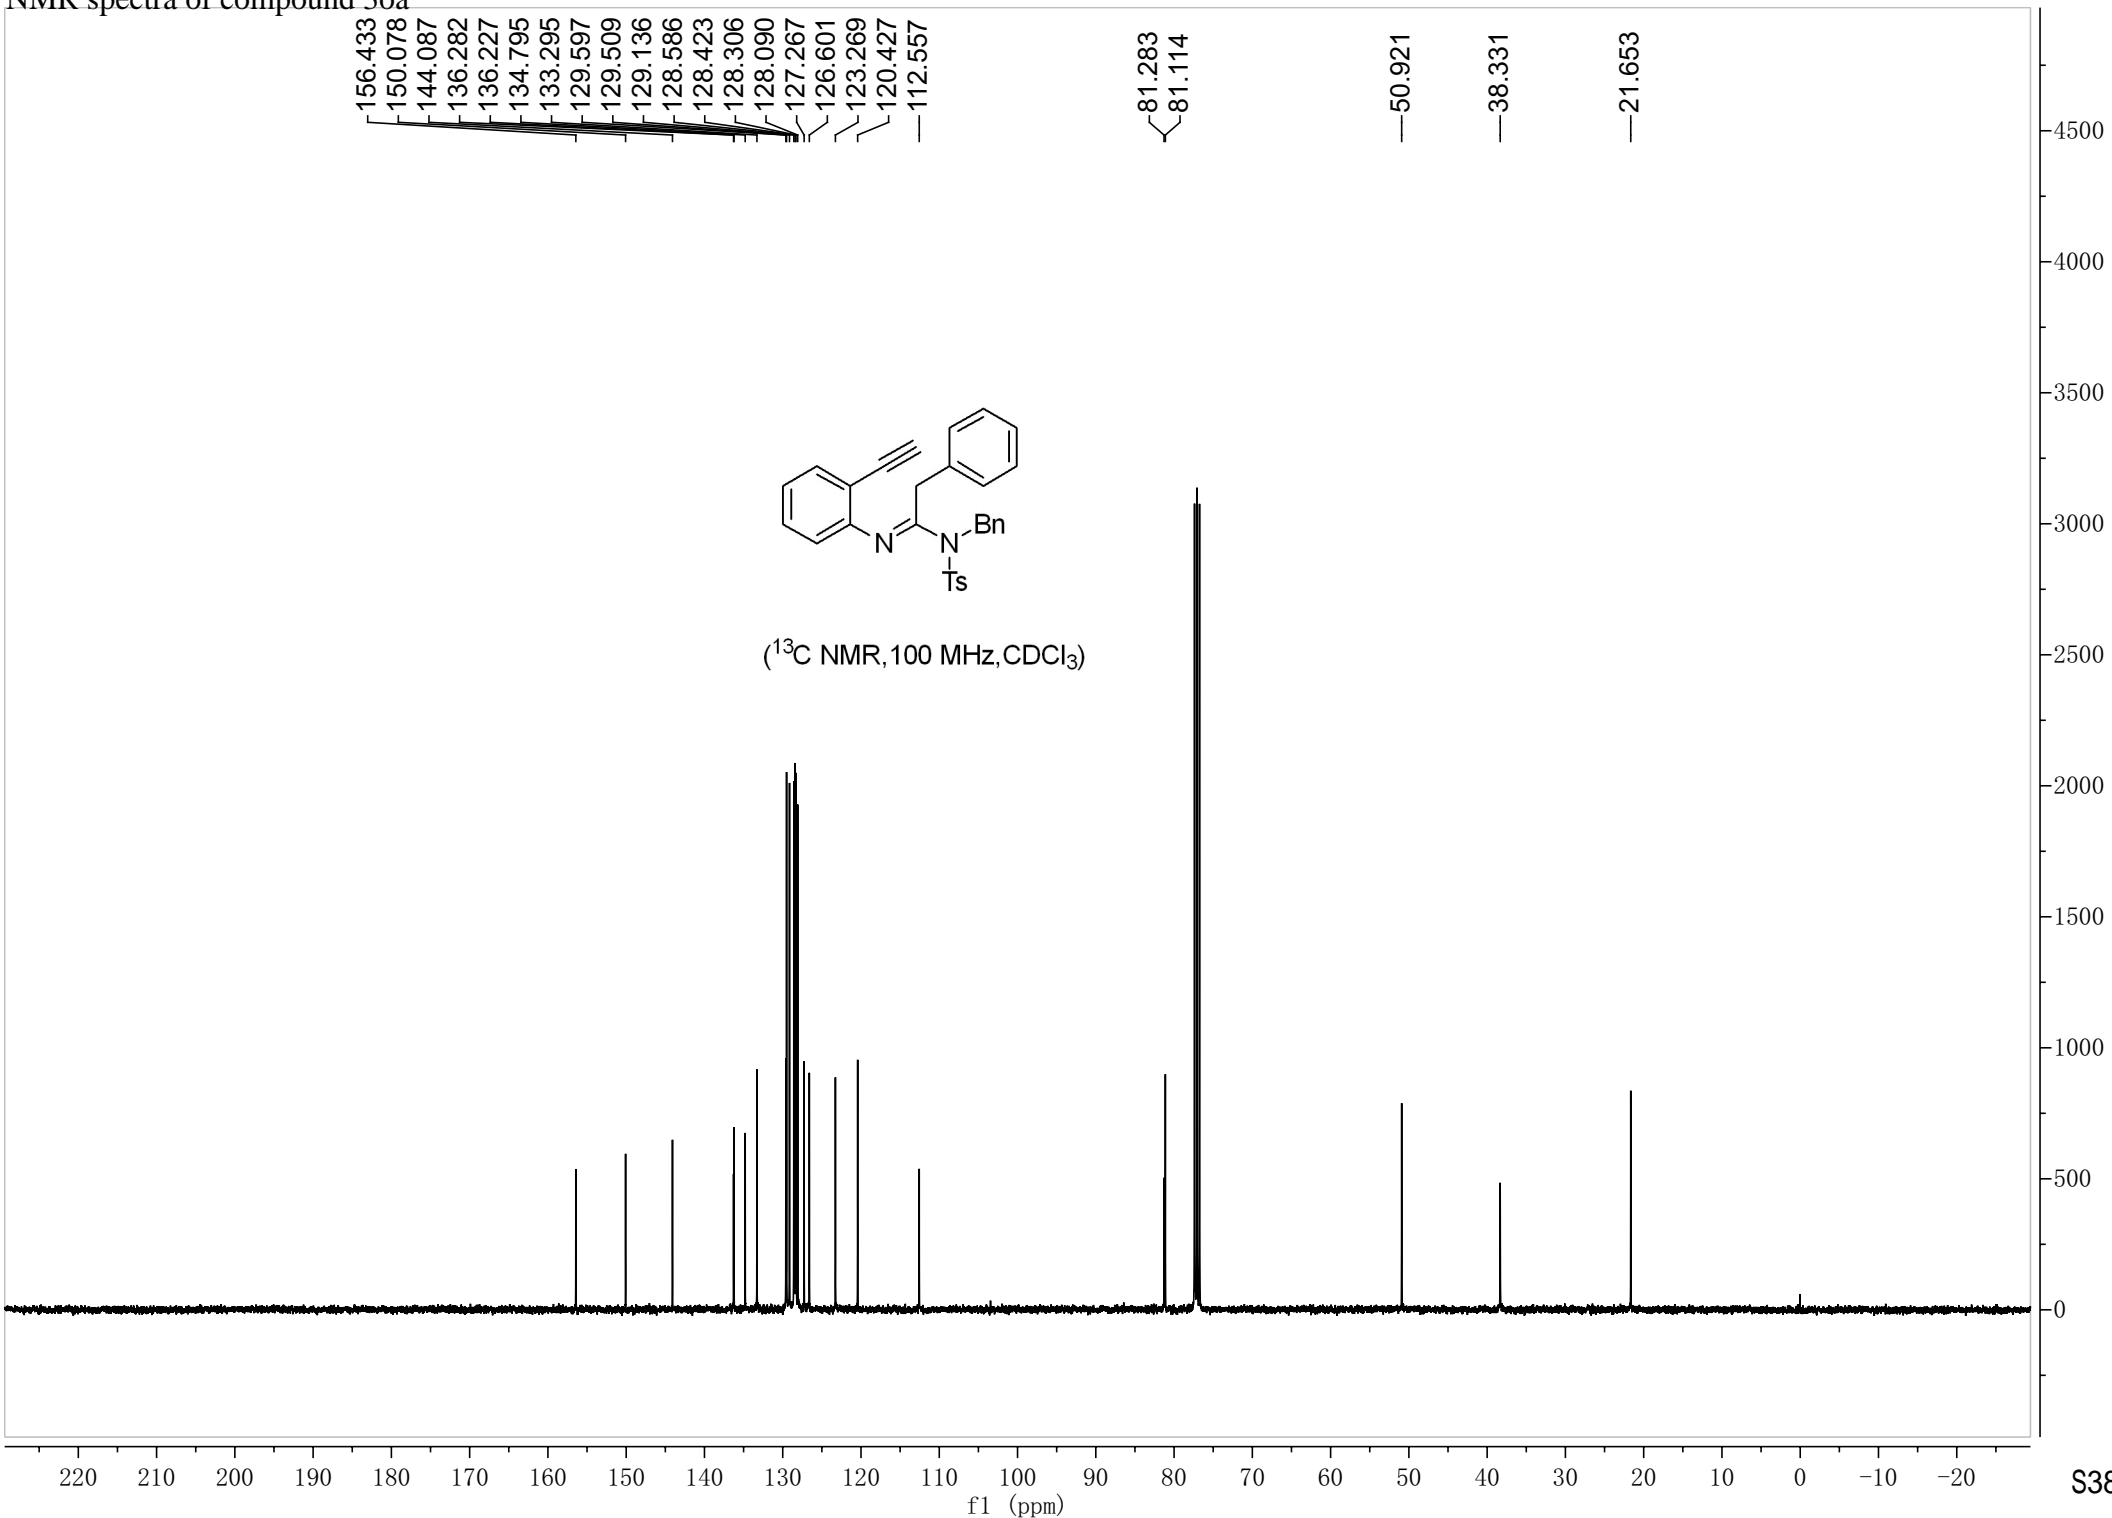

NMR spectra of compound 3ab

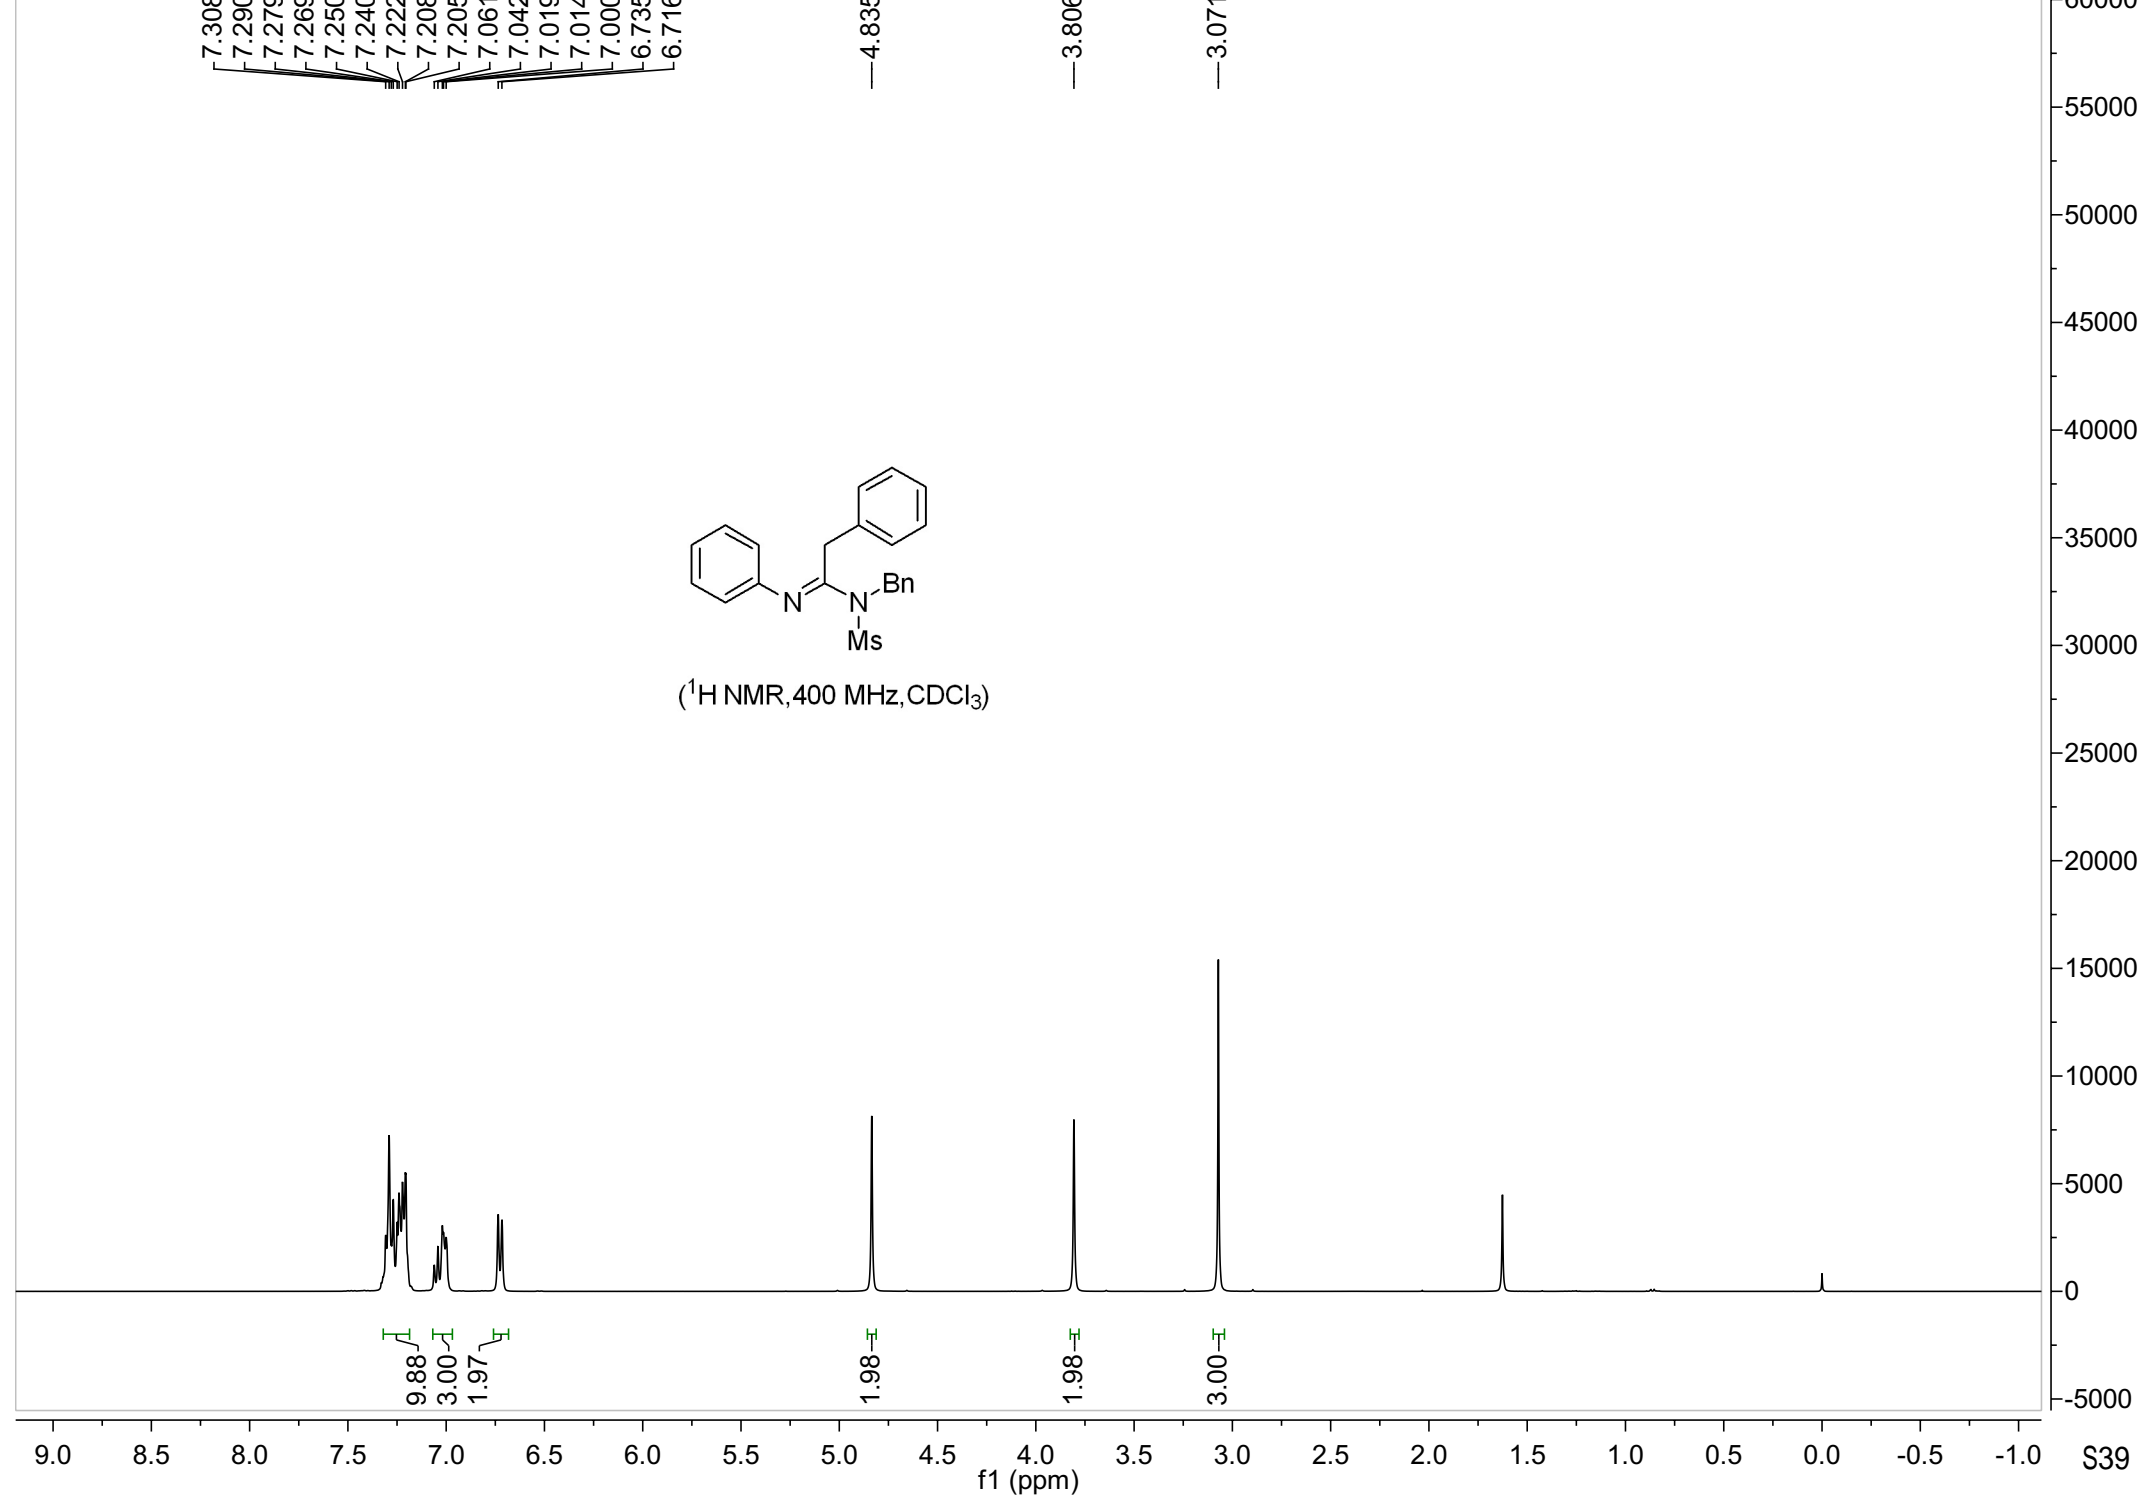

NMR spectra of compound 3ac

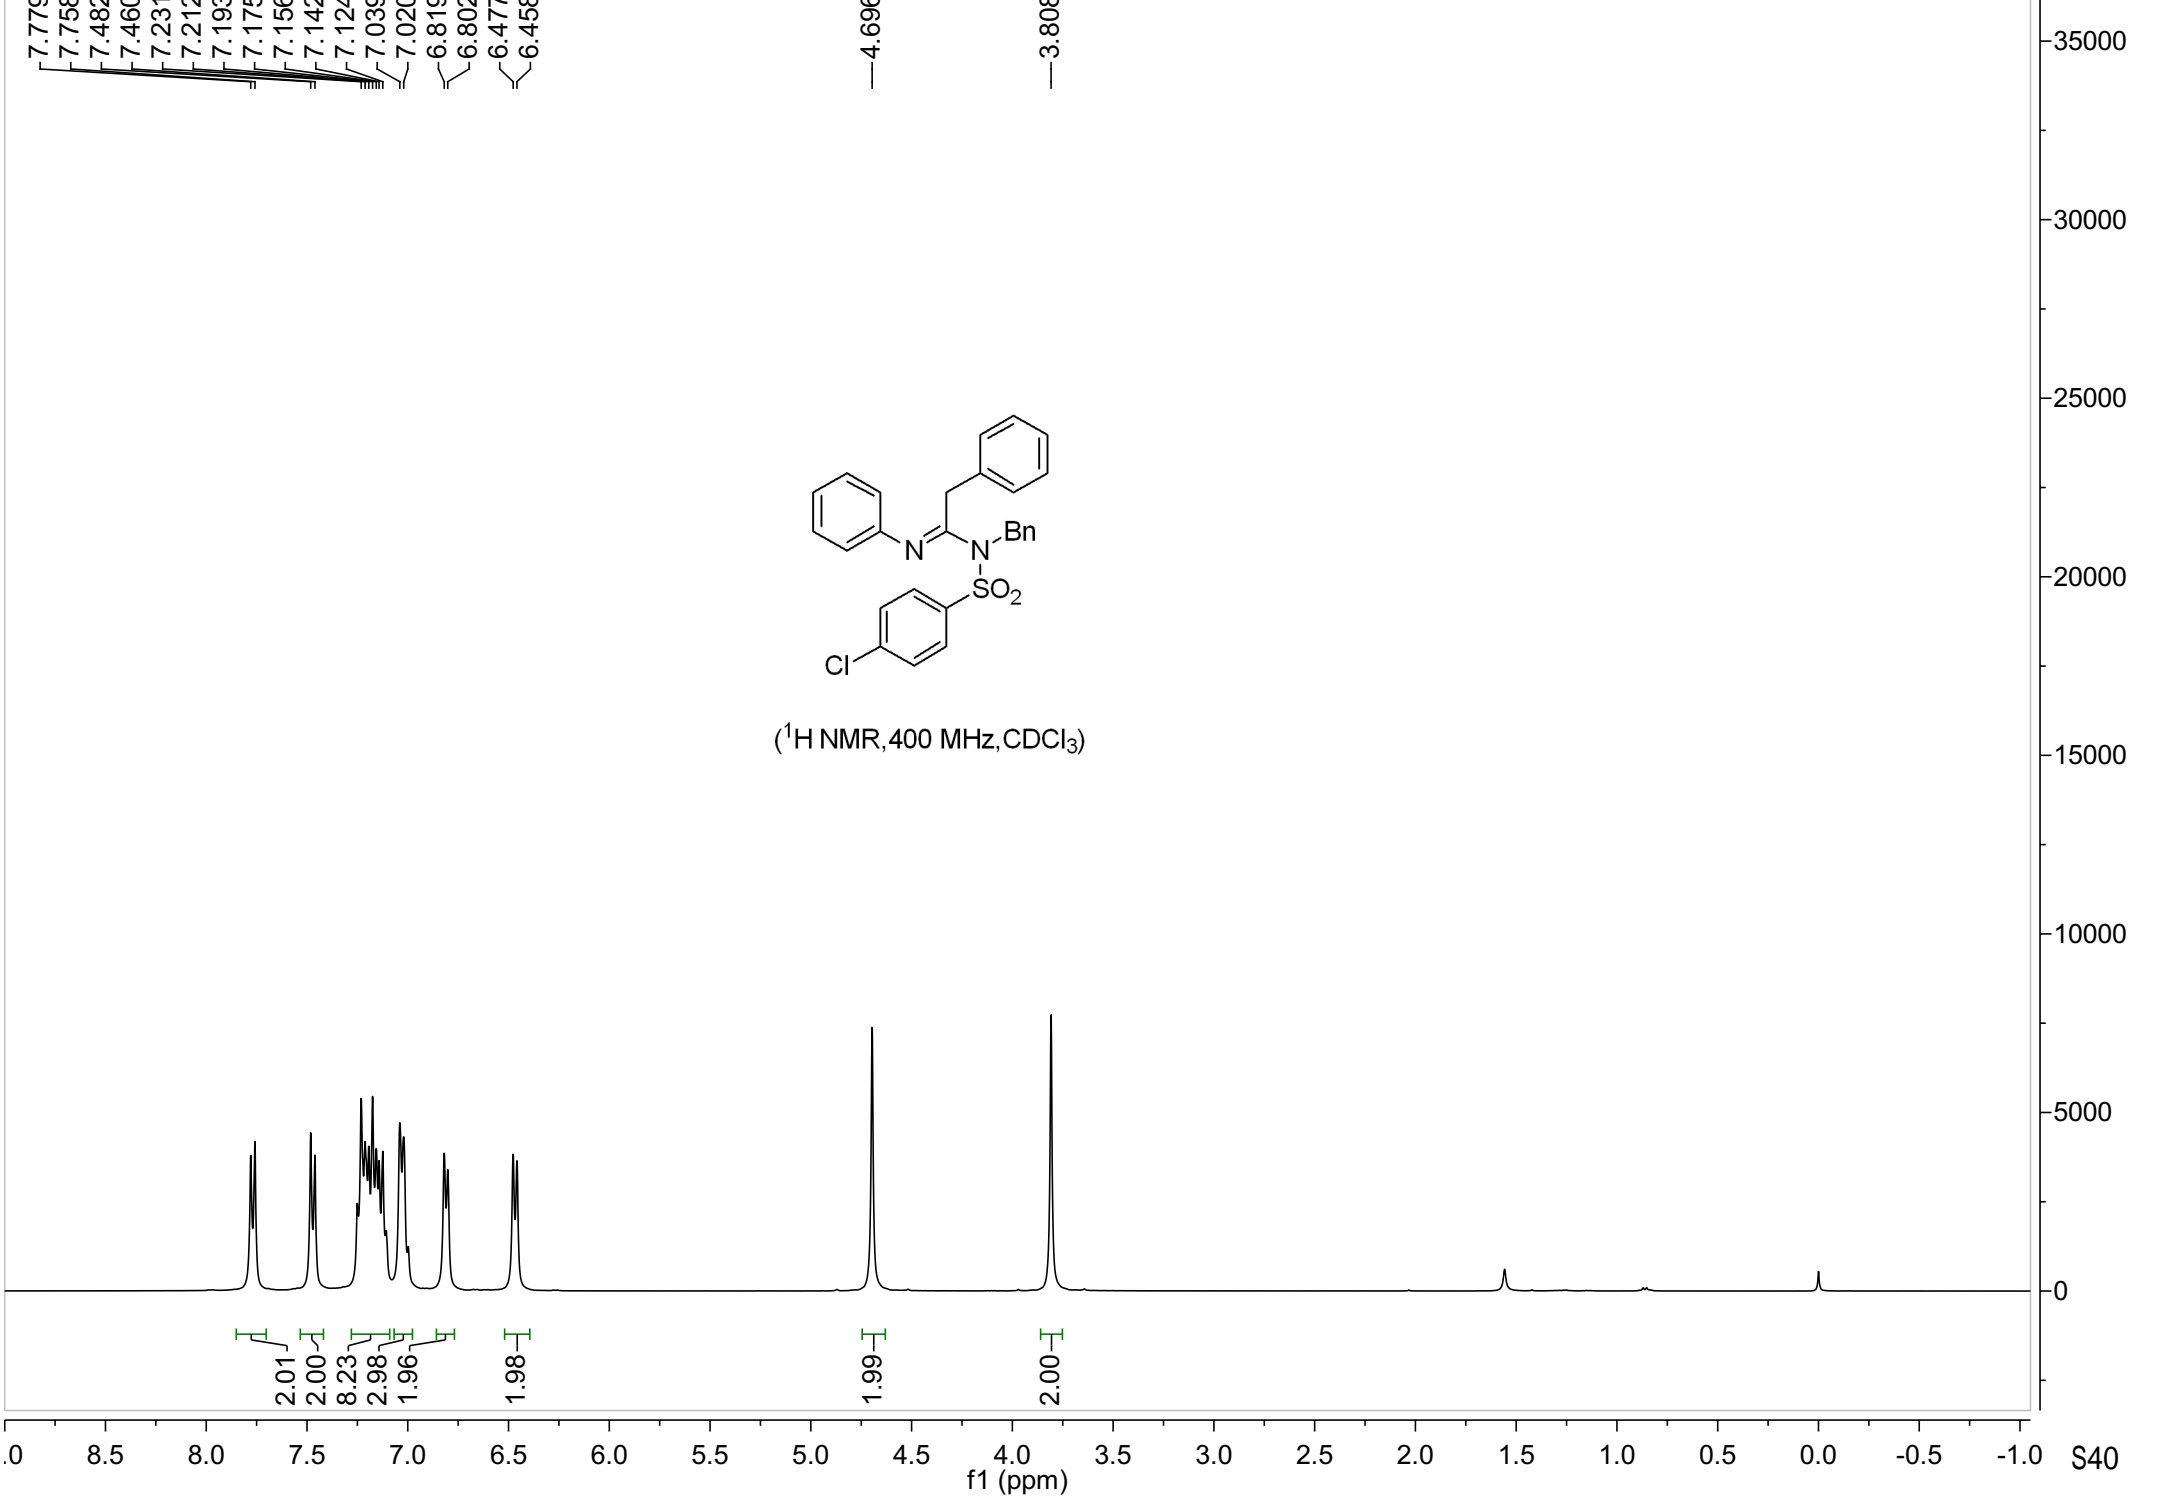

NMR spectra of compound 3ac

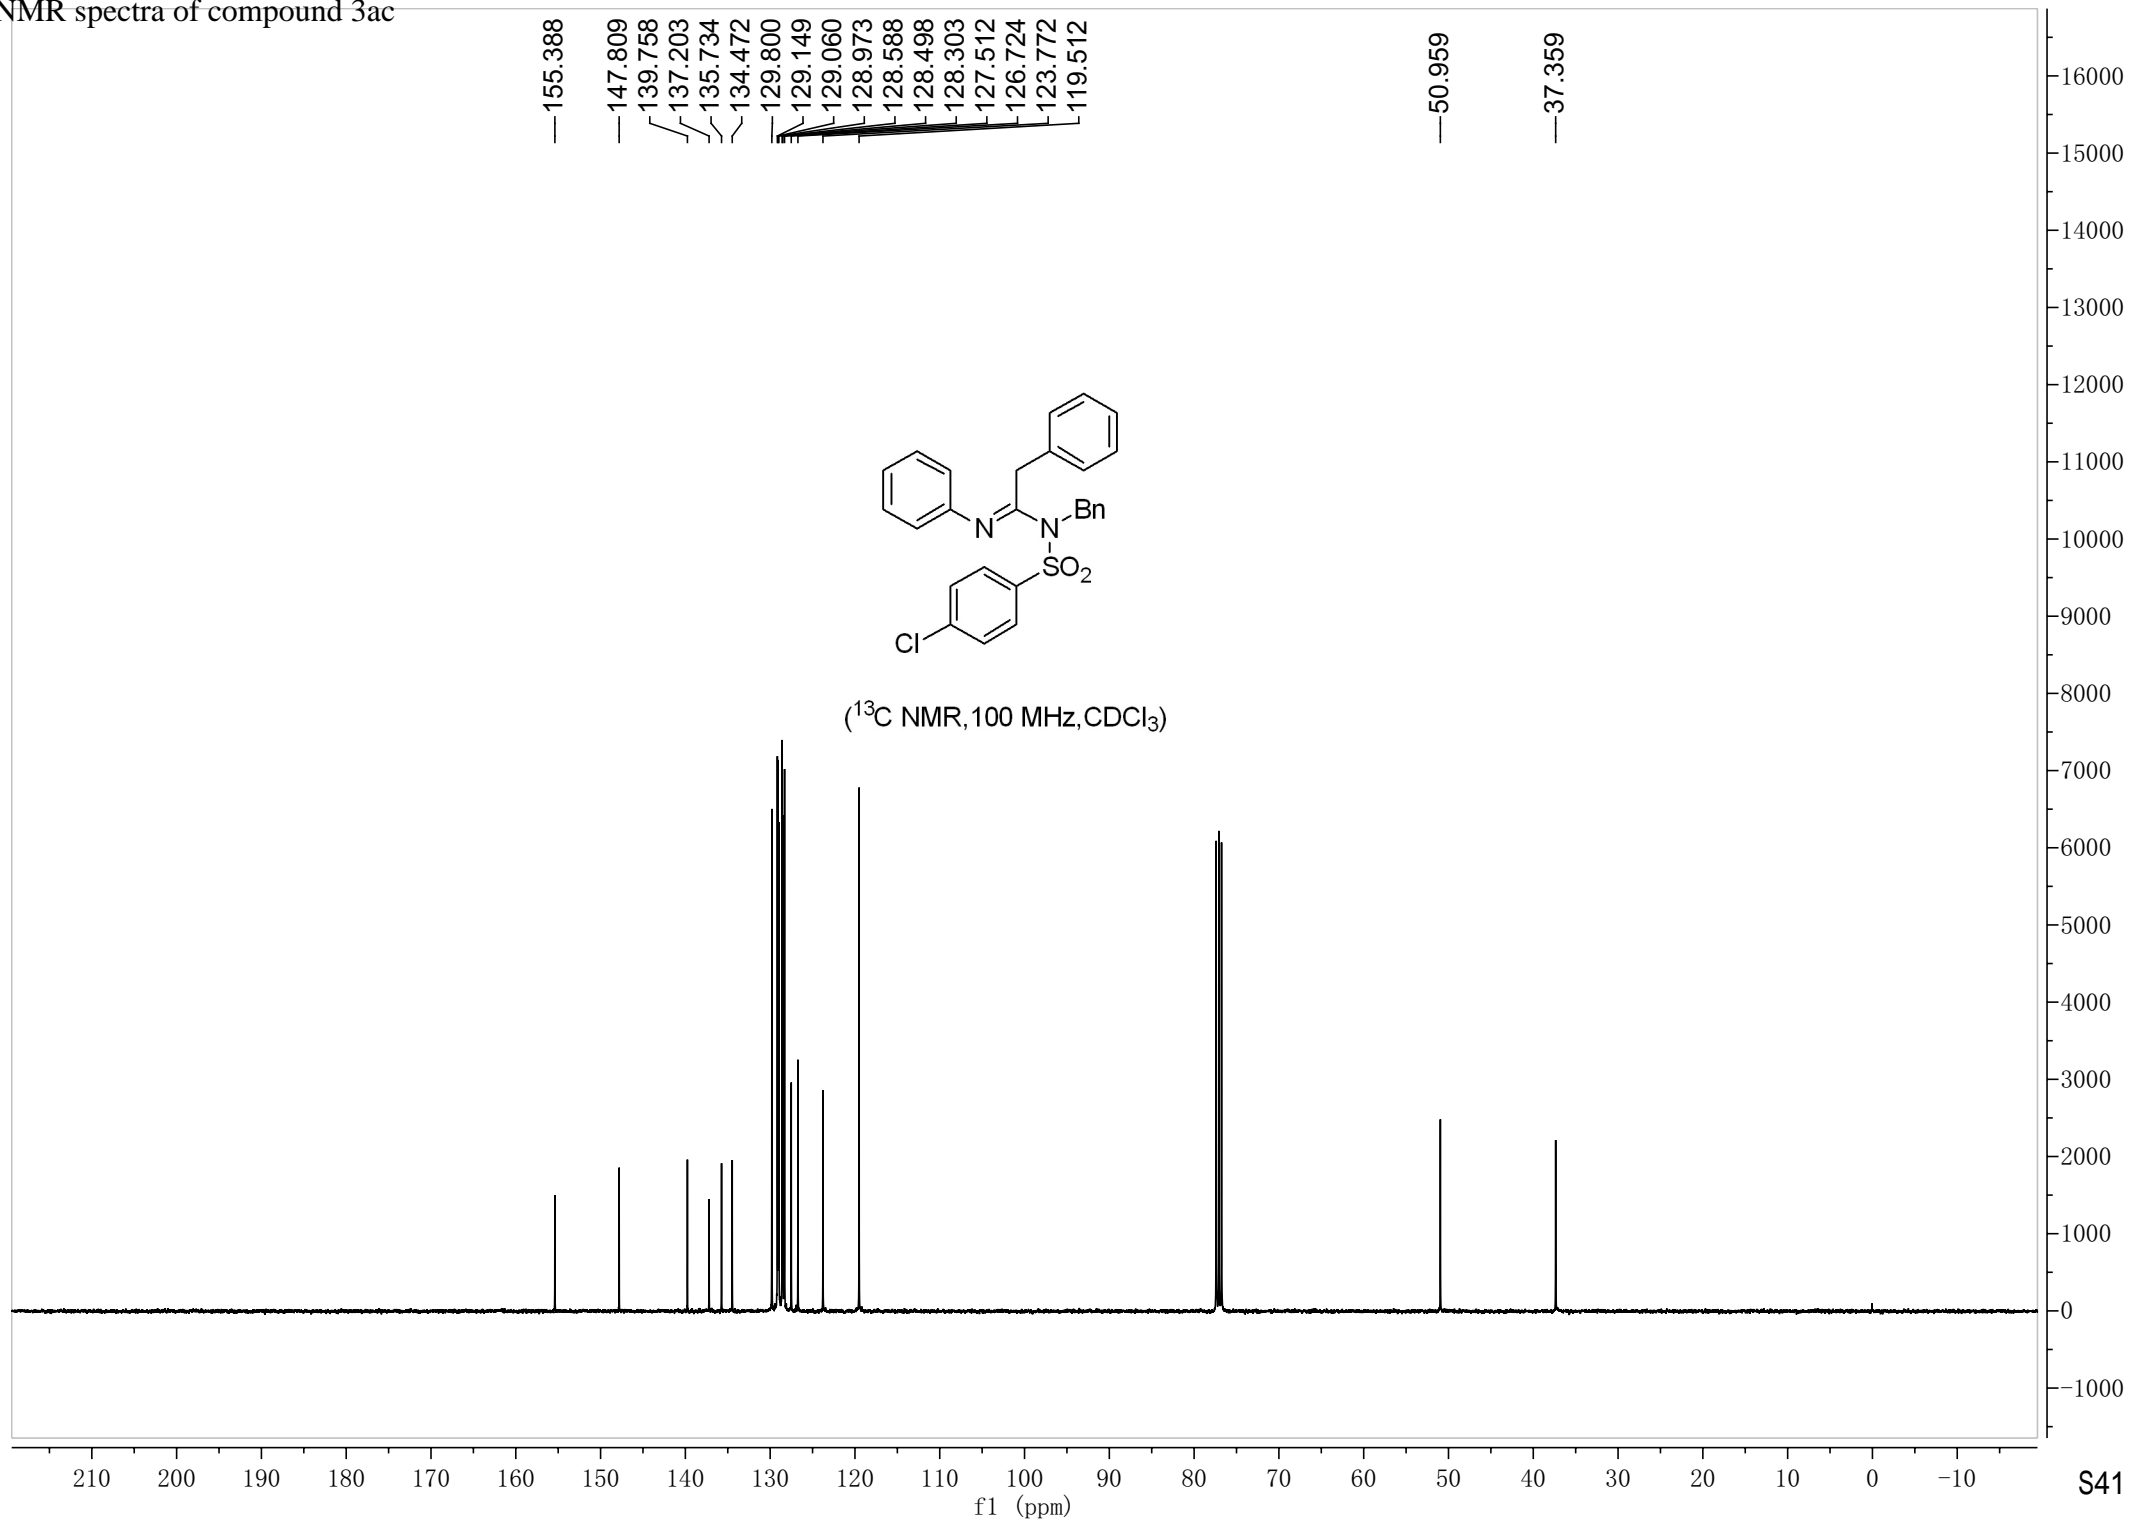

NMR spectra of compound 3ad

7.735  
7.715  
7.271  
7.251  
7.243  
7.231  
7.213  
6.607  
6.588  
5.550  
5.538  
5.524  
5.507  
5.495  
5.493  
5.481  
5.131  
5.128  
5.066  
5.063  
5.041  
5.038  
4.993  
4.179  
3.895  
2.401

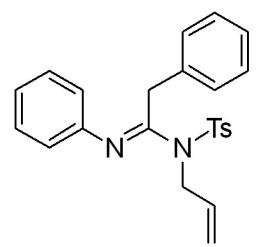

(<sup>1</sup>H NMR, 400 MHz, CDCl<sub>3</sub>)

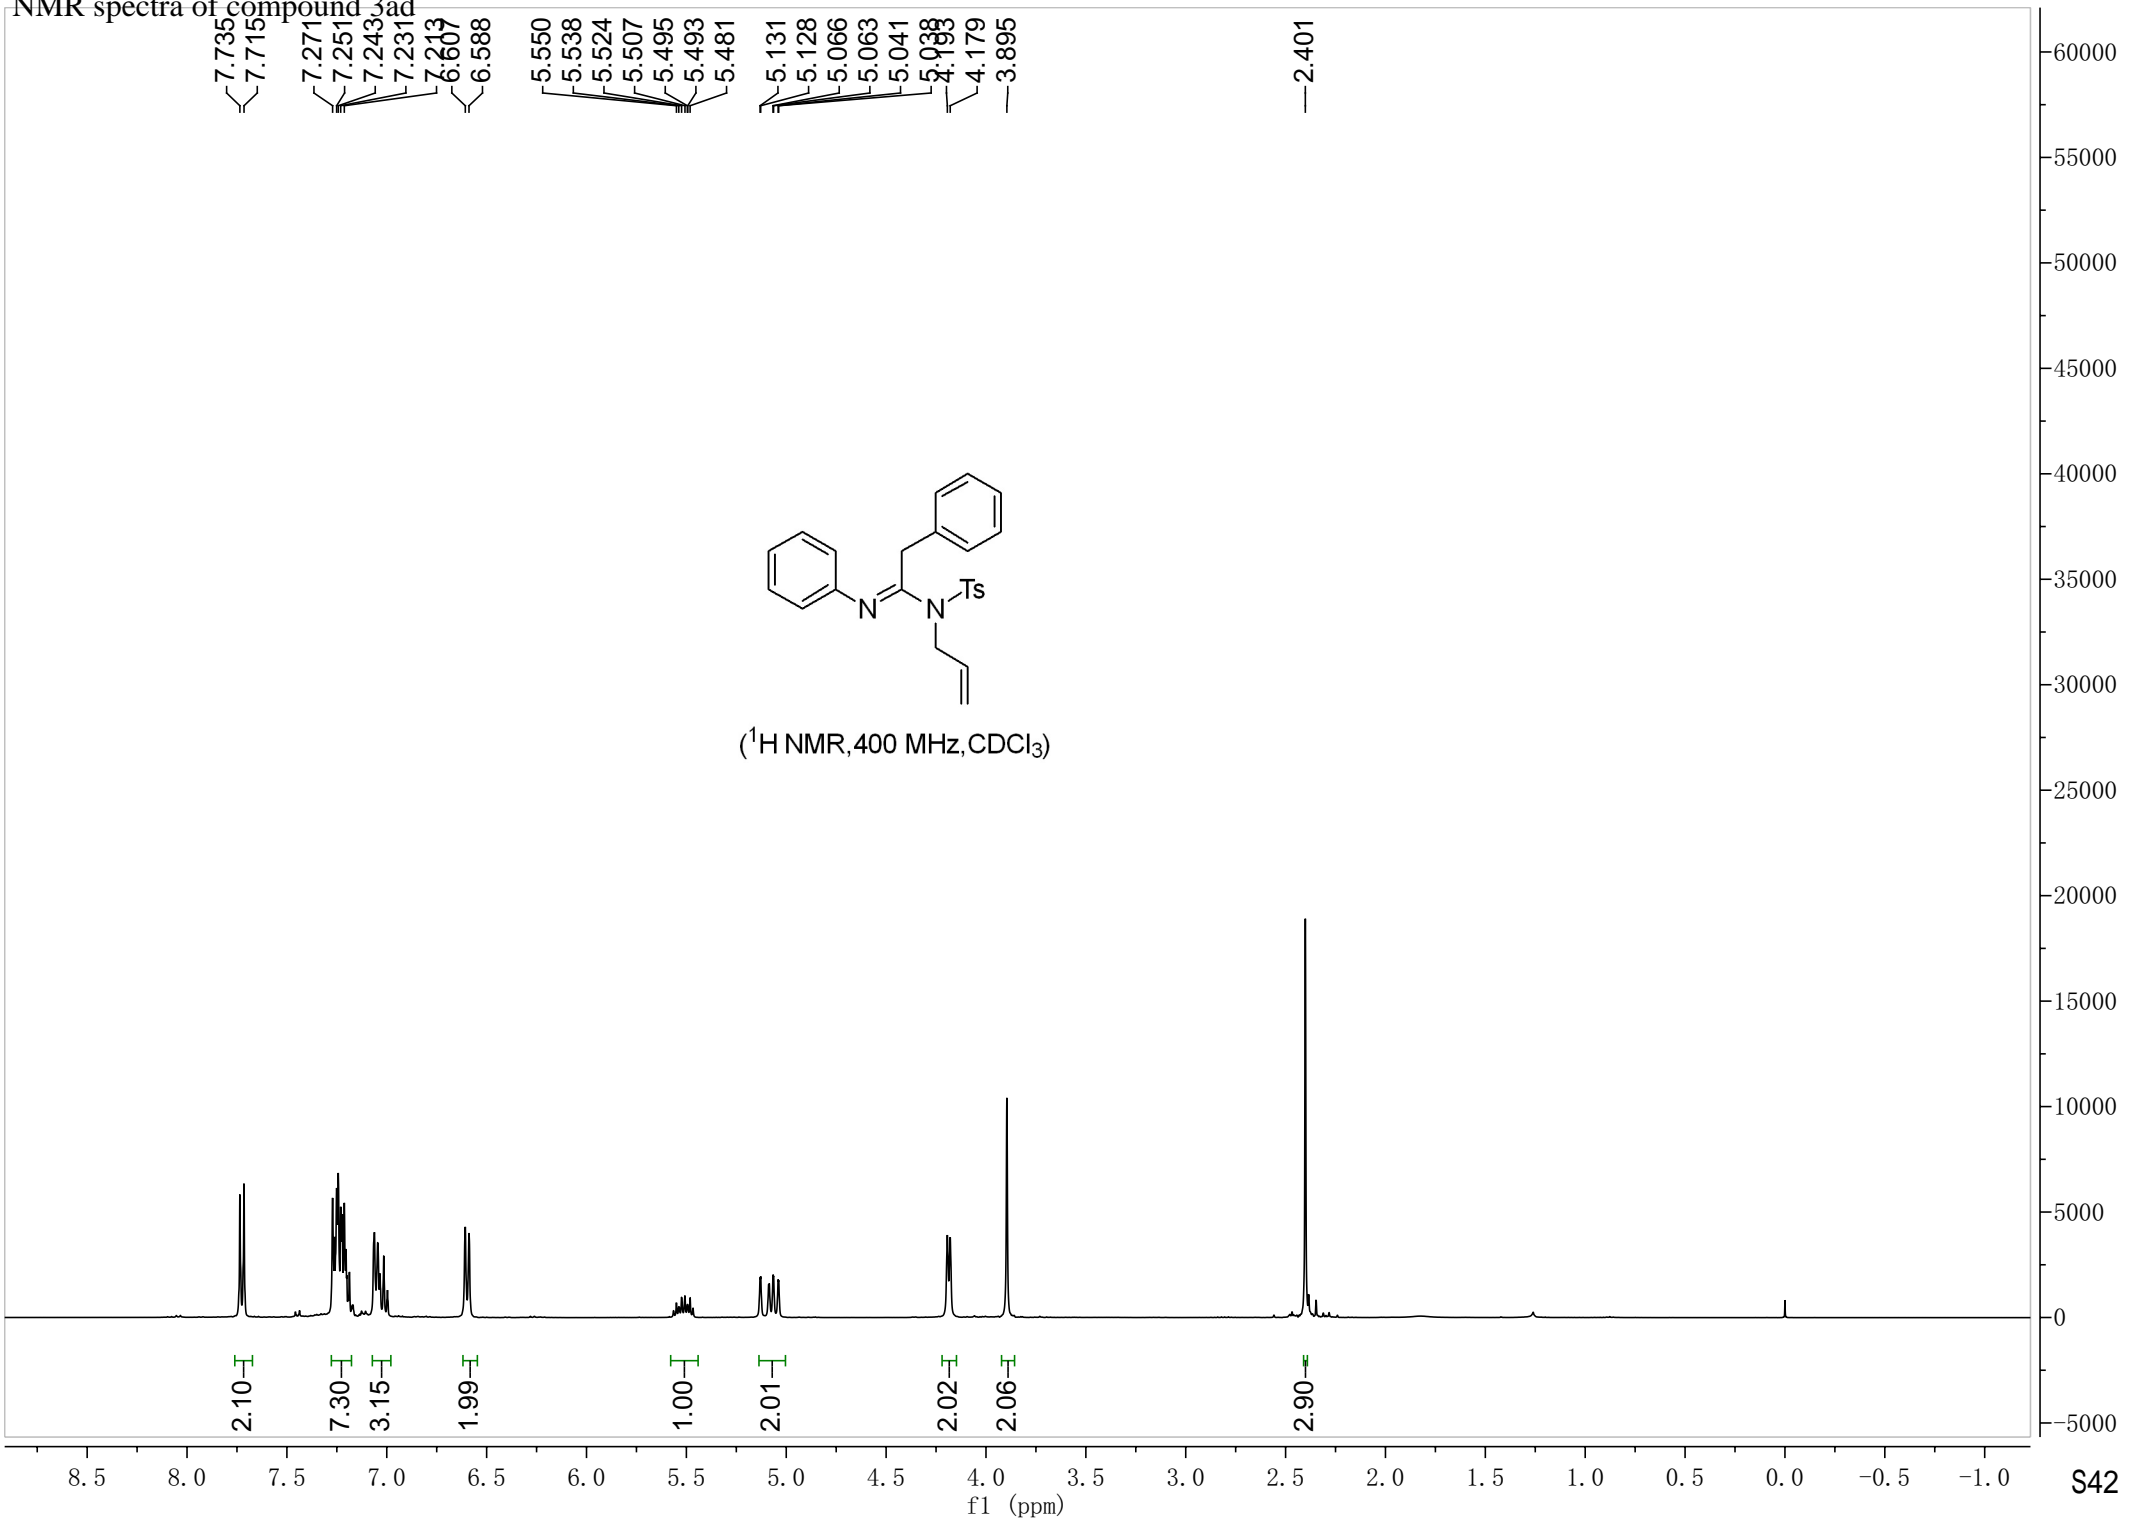

NMR spectra of compound 3ad

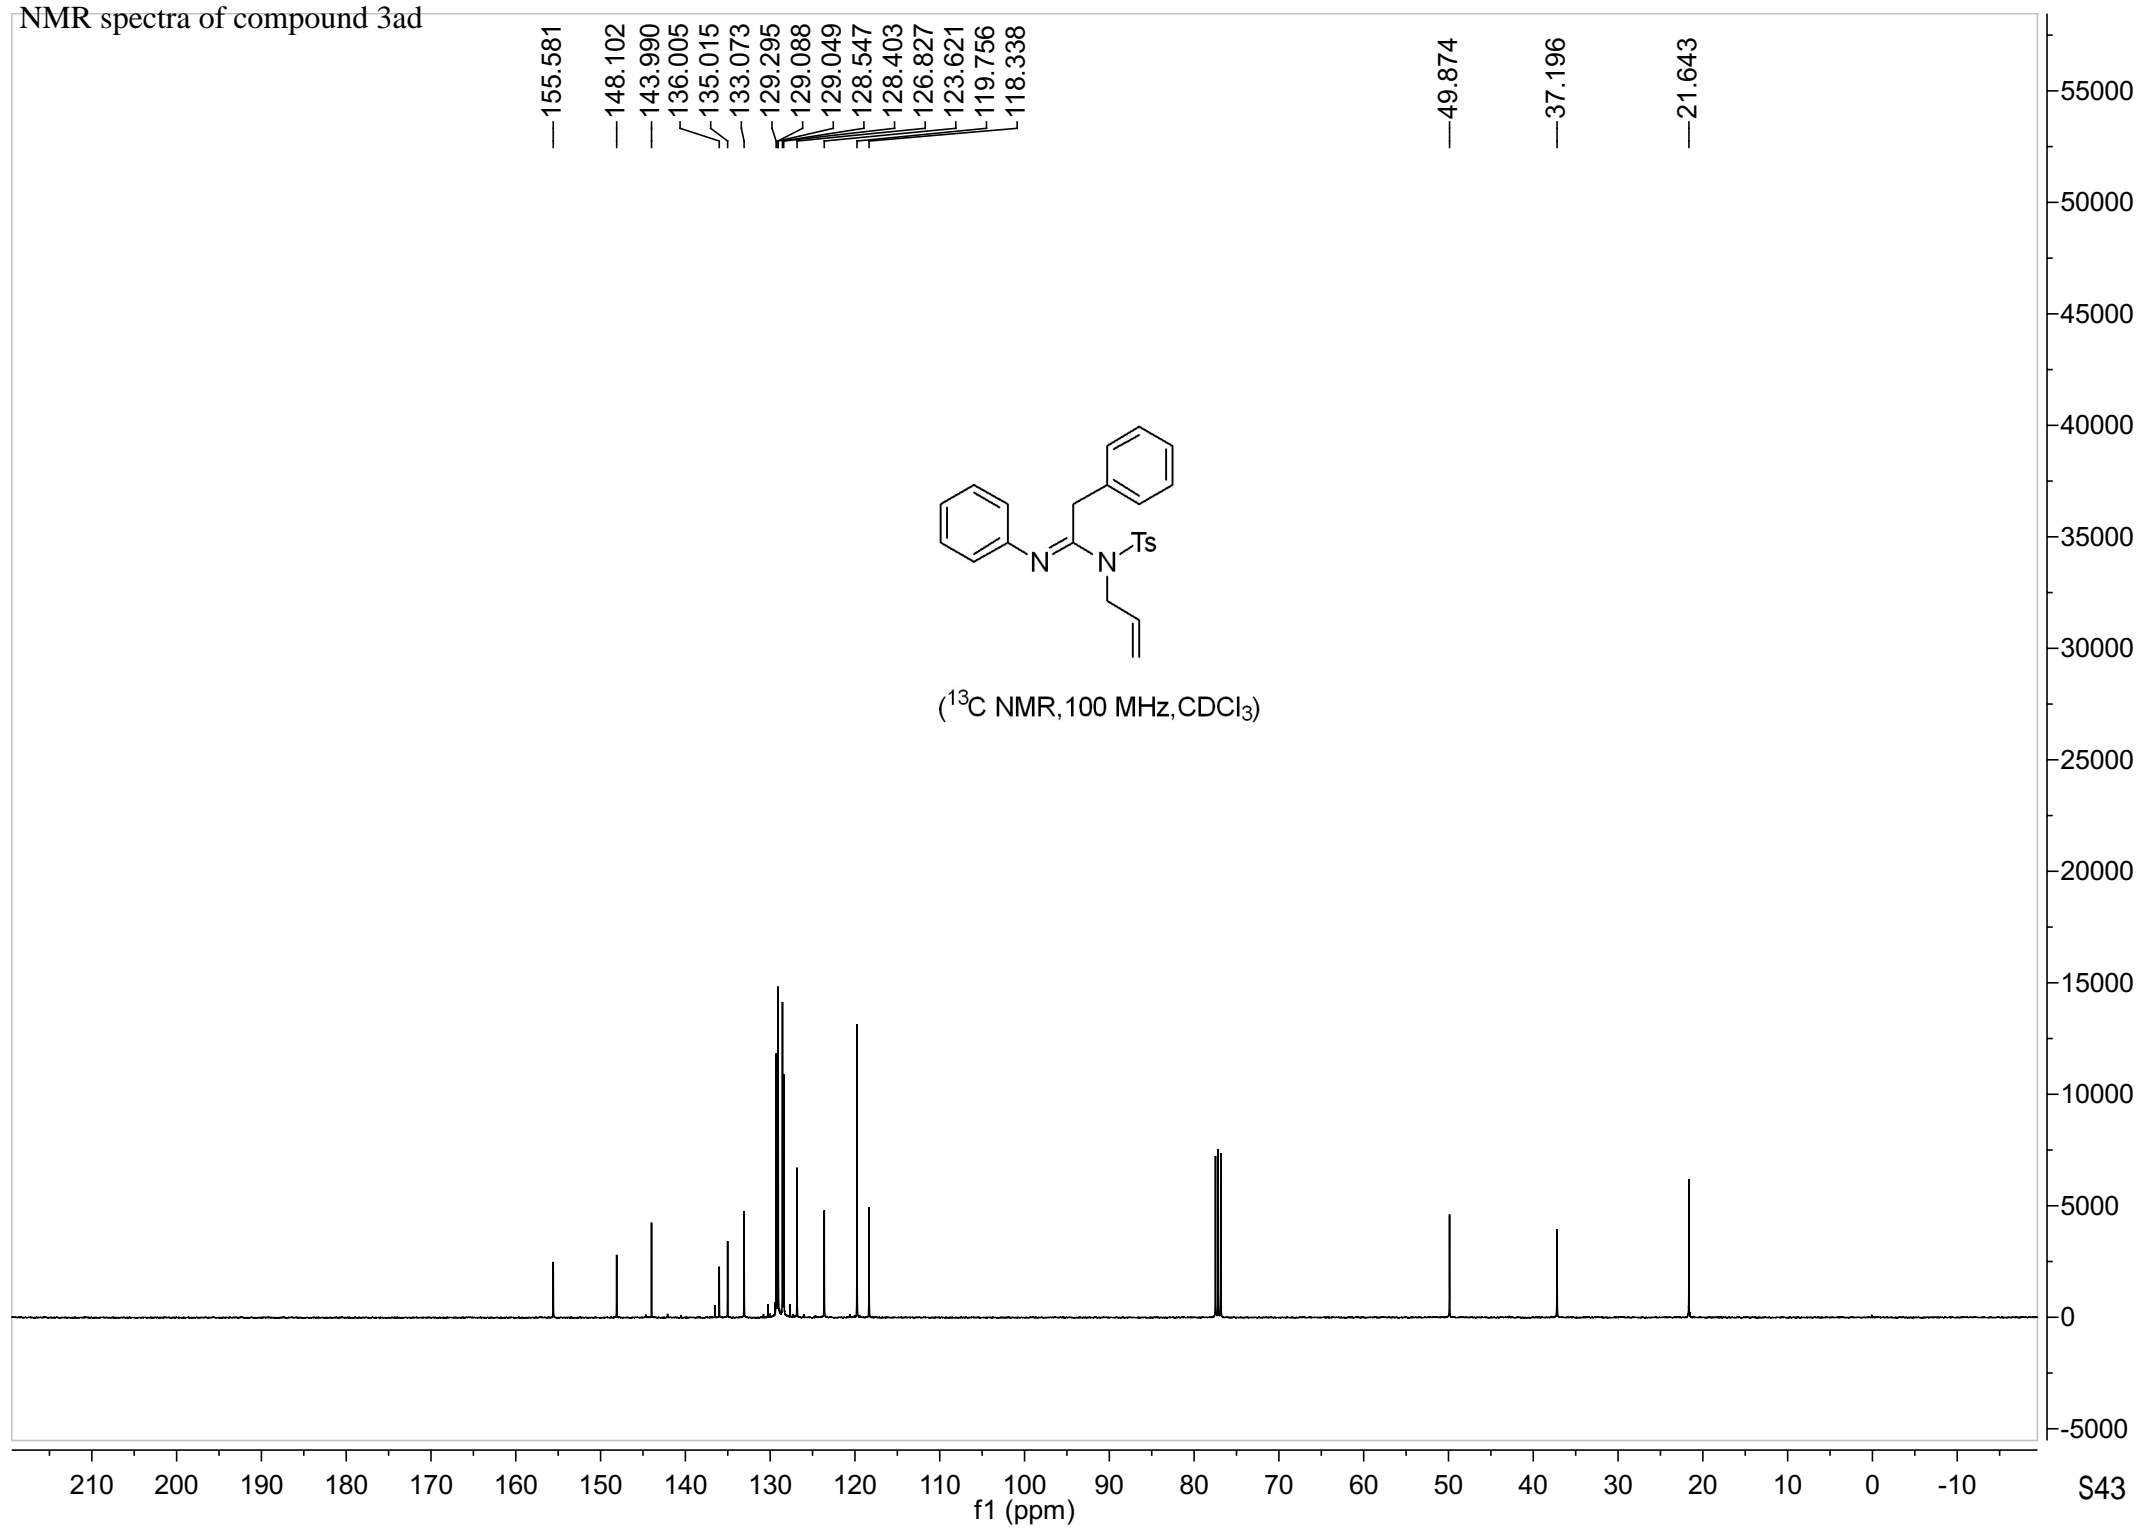

NMR spectra of compound 3ae

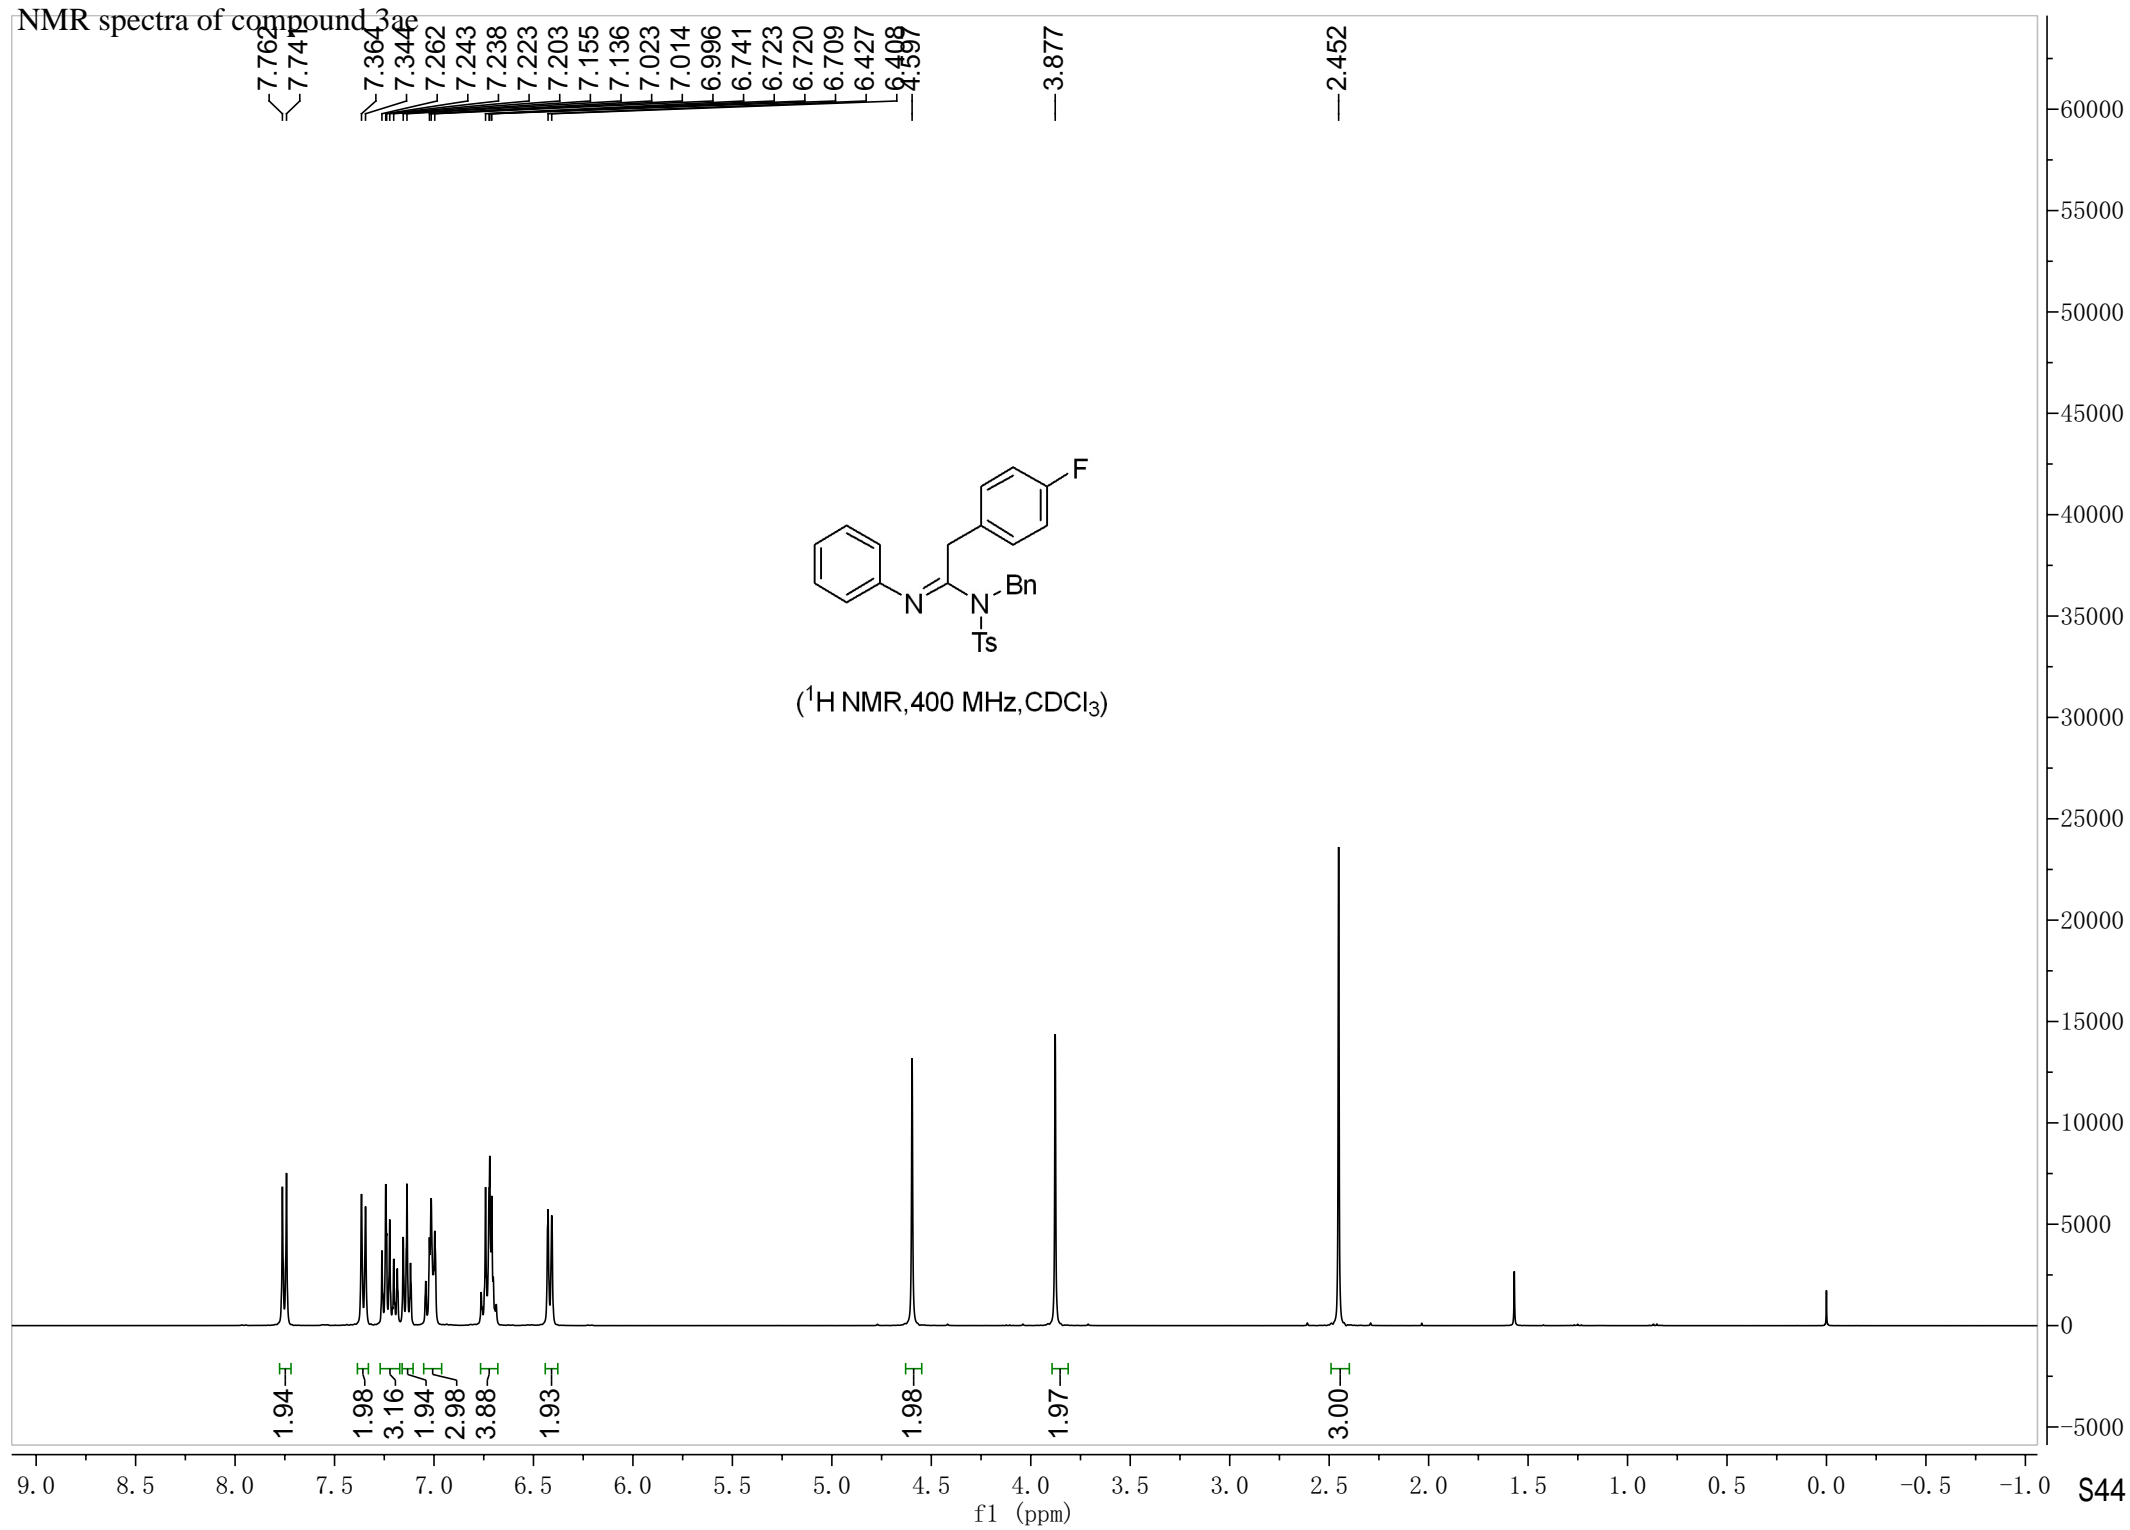



NMR spectra of compound 3ae

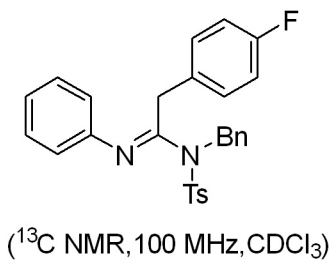

- 162.890
- 160.458
- 155.966
- 148.037
- 144.337
- 135.485
- 135.094
- 130.894
- 130.815
- 130.410
- 130.379
- 129.699
- 129.253
- 129.141
- 127.982
- 127.910
- 127.396
- 123.739
- 119.346
- 115.180
- 114.968

— 51.328

— 37.364

— 21.662

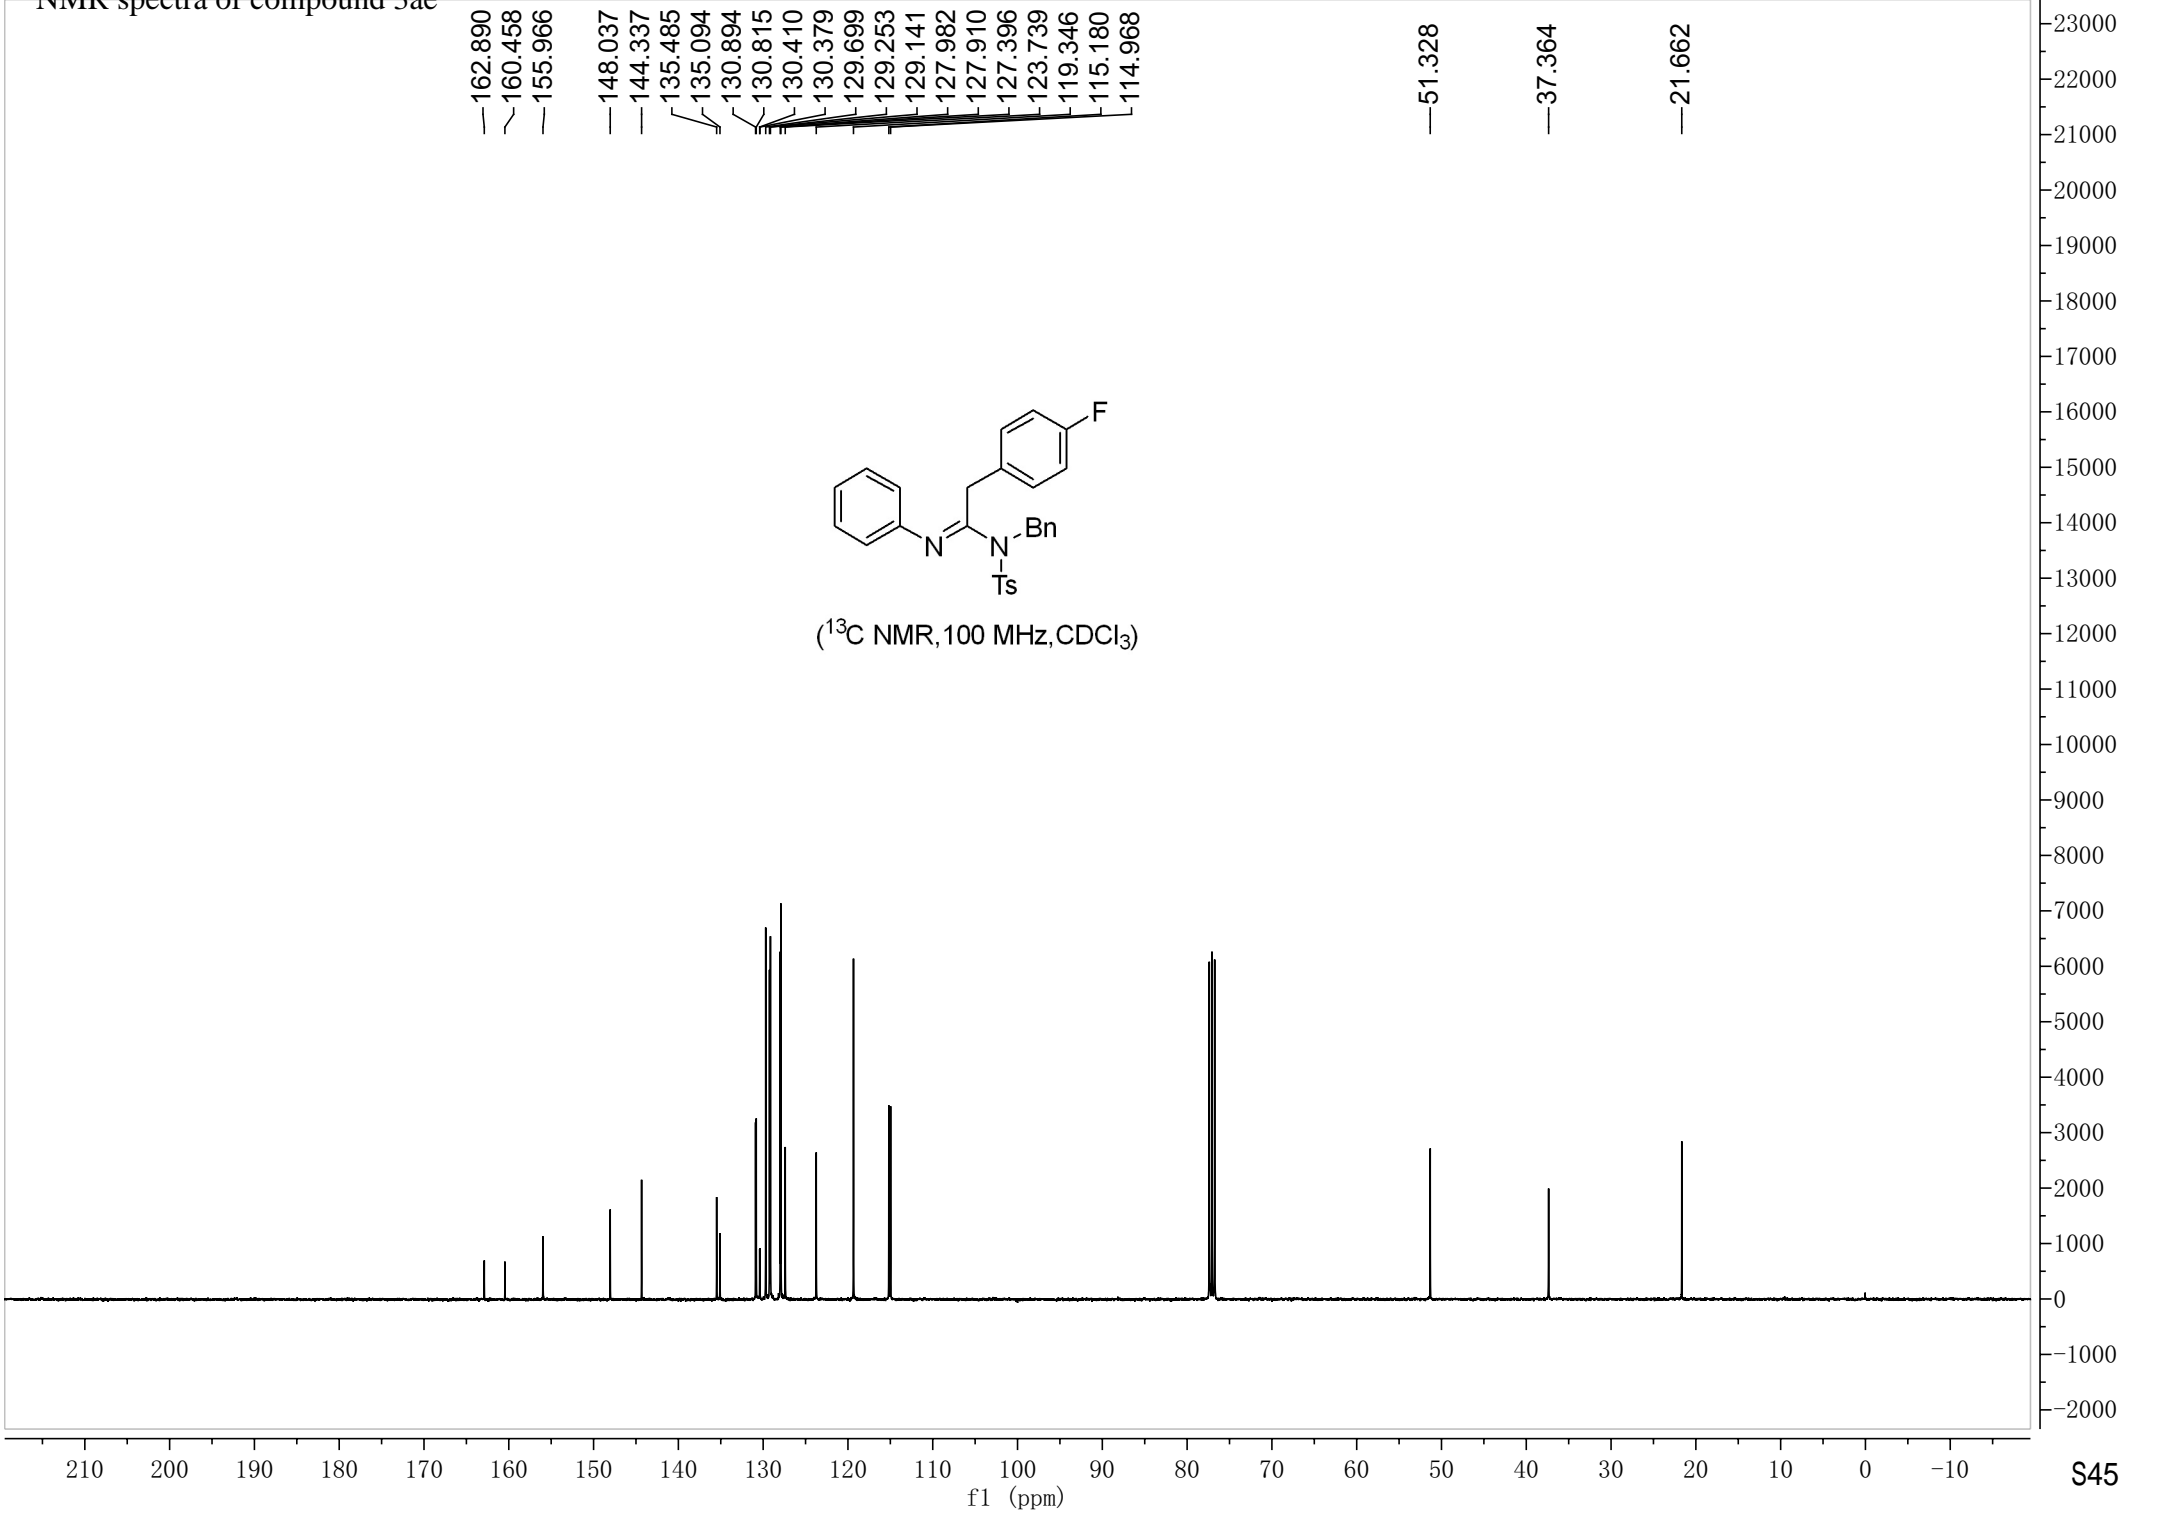

NMR spectra of compound 3ae

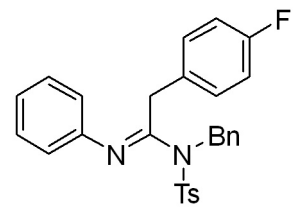

(<sup>19</sup>F NMR, 376 MHz, CDCl<sub>3</sub>)

---116.561

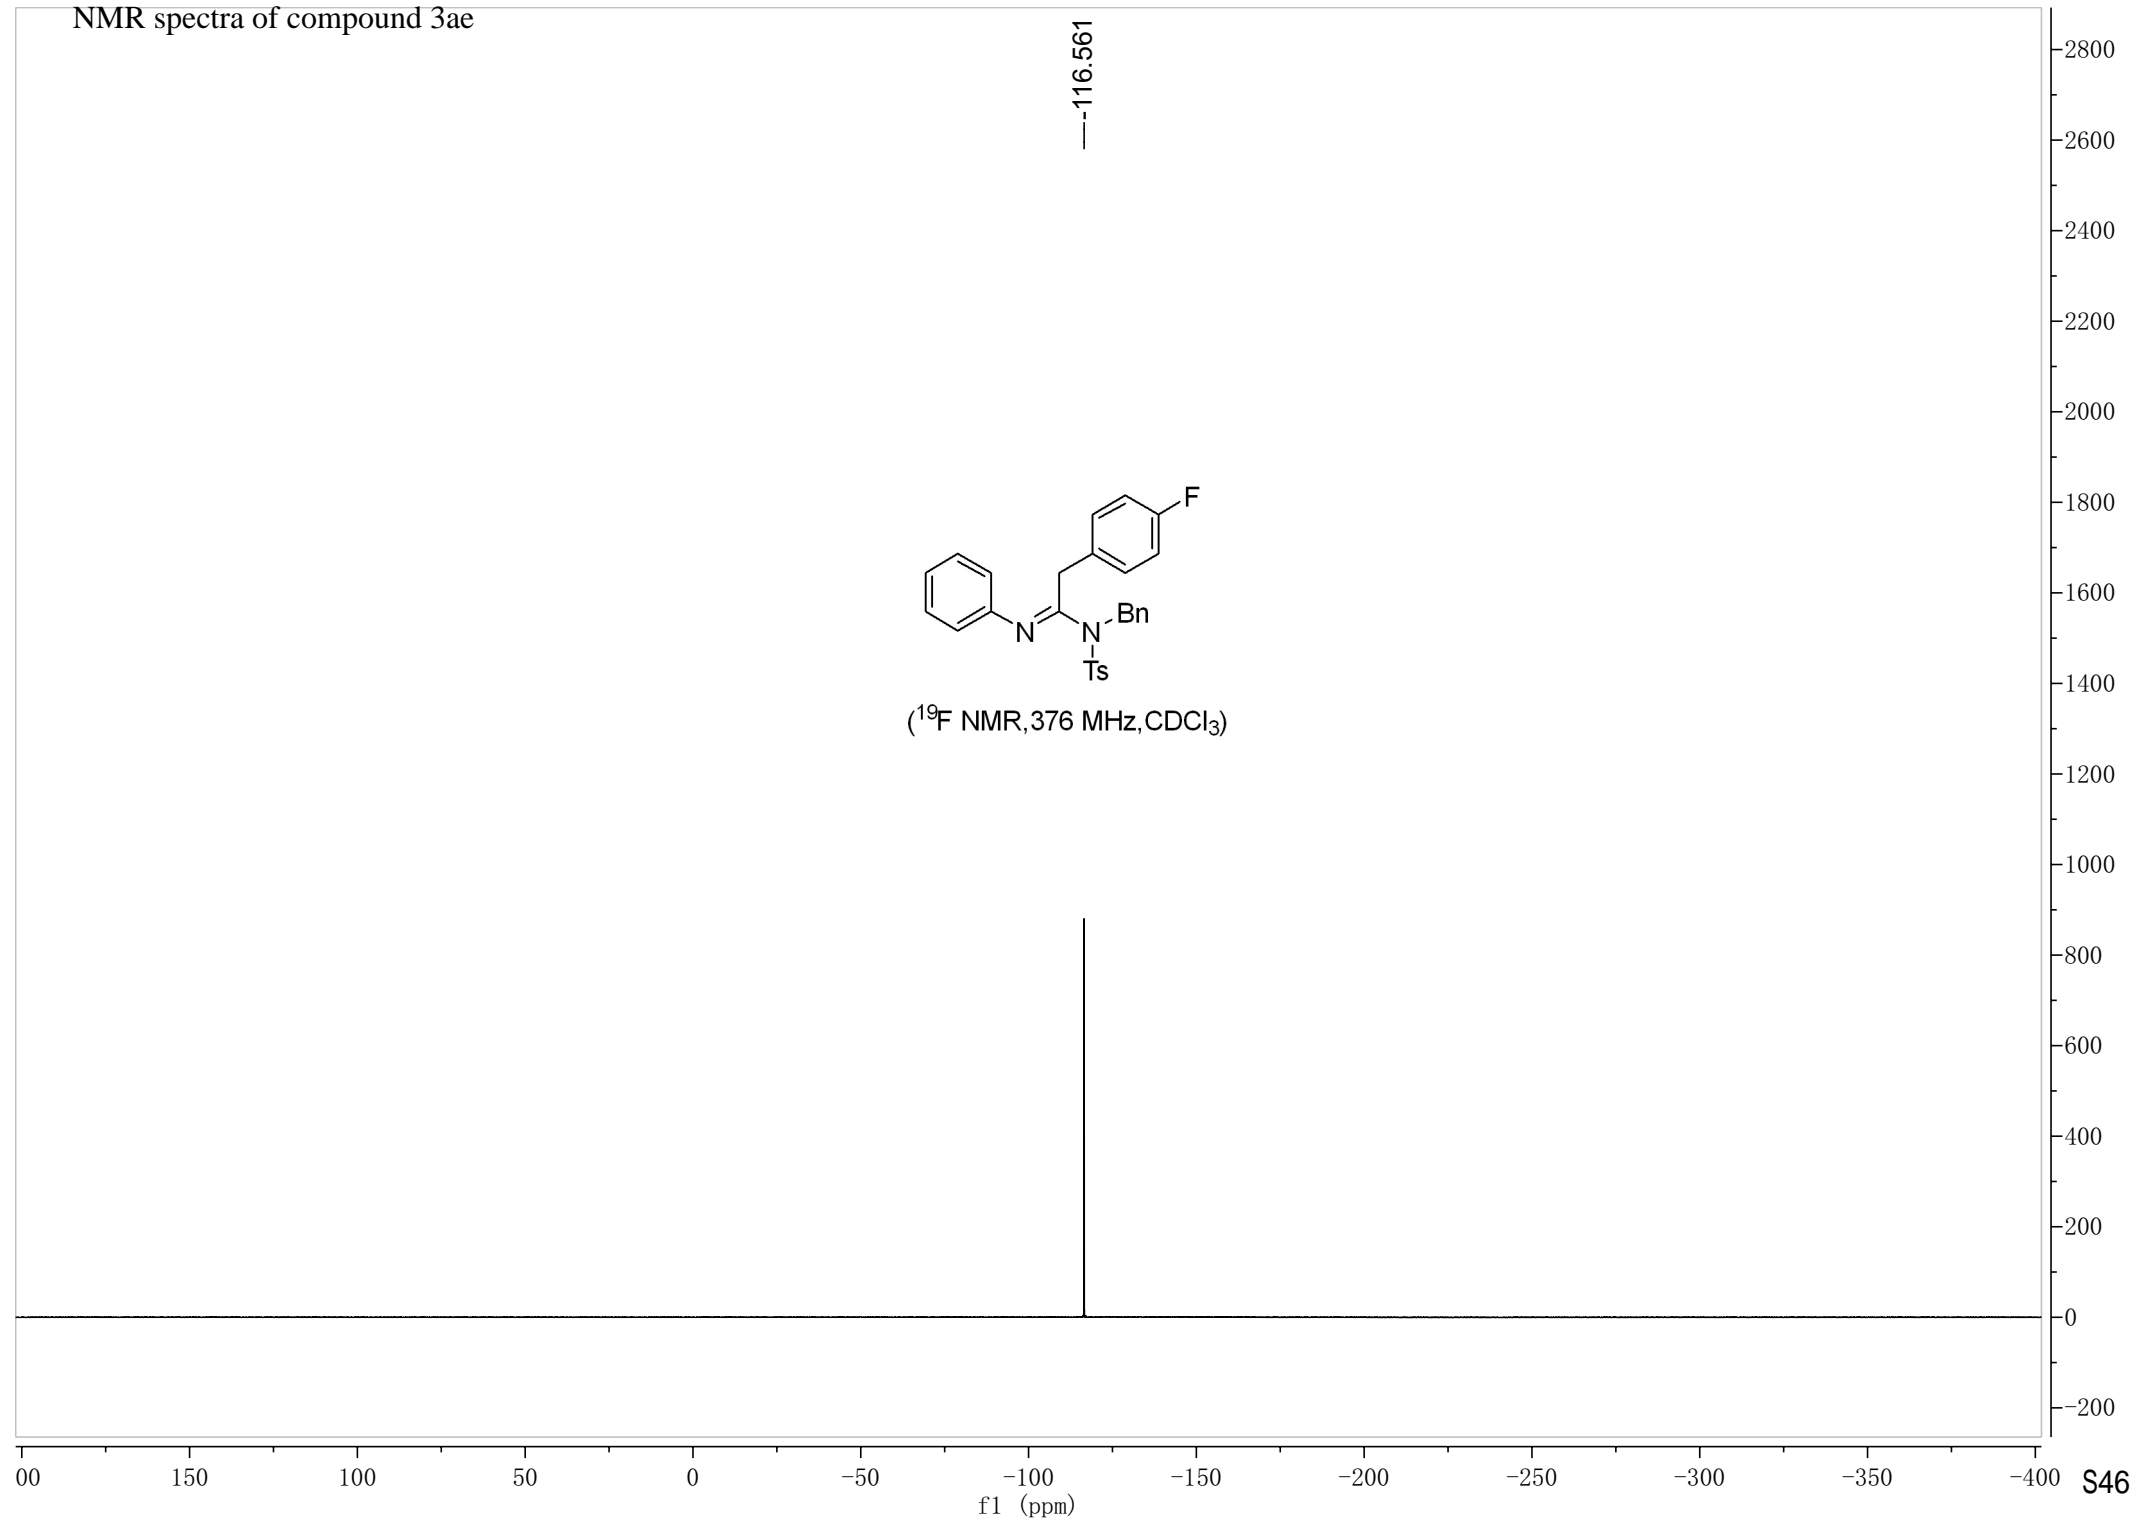

NMR spectra of compound 3af

7.762  
7.741  
7.364  
7.344  
7.261  
7.242  
7.241  
7.238  
7.222  
7.154  
7.135  
7.022  
7.014  
6.996  
6.740  
6.723  
6.719  
6.709  
6.429  
6.426  
6.408  
6.396

3.876

2.452

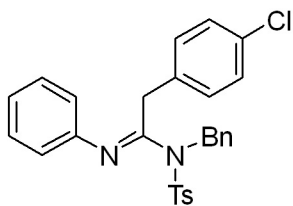

(<sup>1</sup>H NMR, 400 MHz, CDCl<sub>3</sub>)

1.96

1.94

3.08

1.96

2.91

3.87

1.96

1.97

2.00

3.00

8.5 8.0 7.5 7.0 6.5 6.0 5.5 5.0 4.5 4.0 3.5 3.0 2.5 2.0 1.5 1.0 0.5 0.0 -0.5

f1 (ppm)

NMR spectra of compound 3af

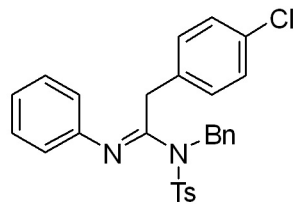

(<sup>13</sup>C NMR, 100 MHz, CDCl<sub>3</sub>)

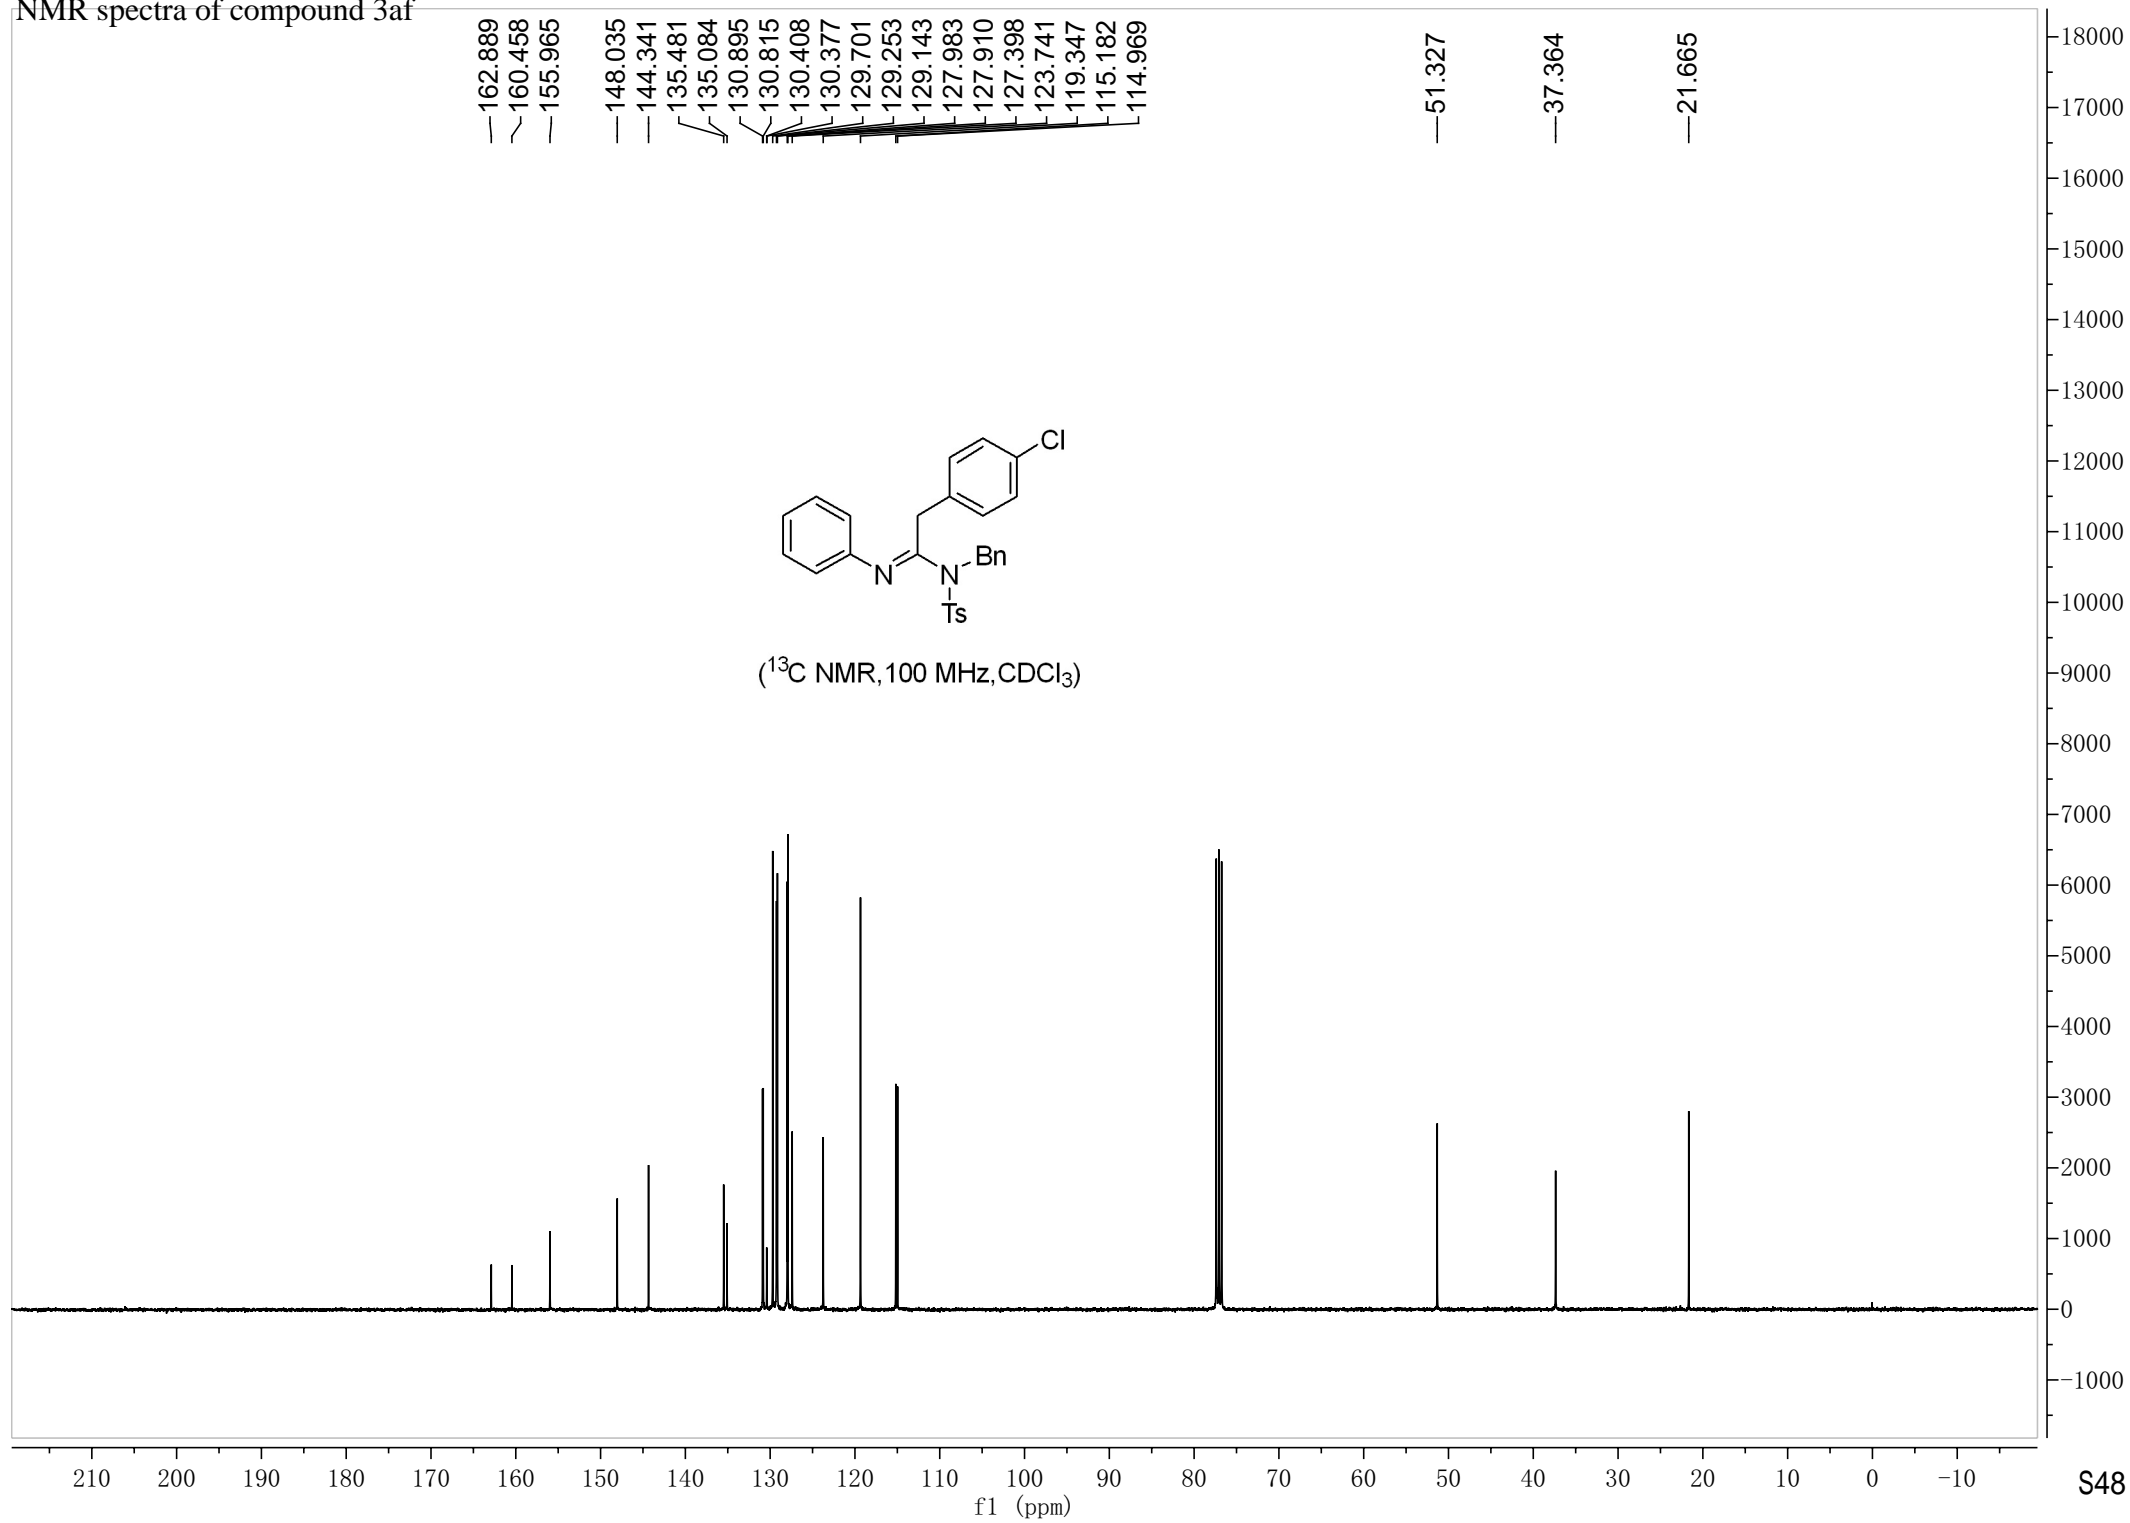

NMR spectra of compound 3a<sub>g</sub>

7.754  
7.733  
7.370  
7.251  
7.167  
7.147  
6.625  
6.604  
6.436  
6.434  
6.416

4.589

3.860

2.462

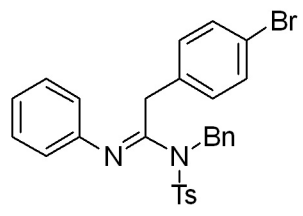

(<sup>1</sup>H NMR, 400 MHz, CDCl<sub>3</sub>)

1.90

2.02

3.22

3.91

2.97

1.96

1.98

1.98

2.01

3.00

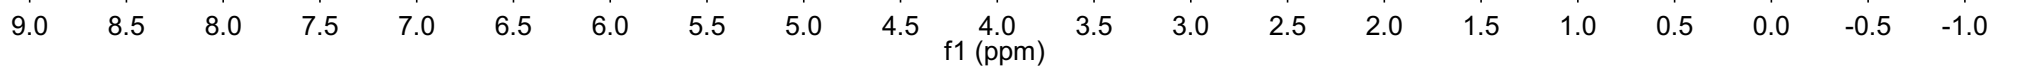

NMR spectra of compound 3ag

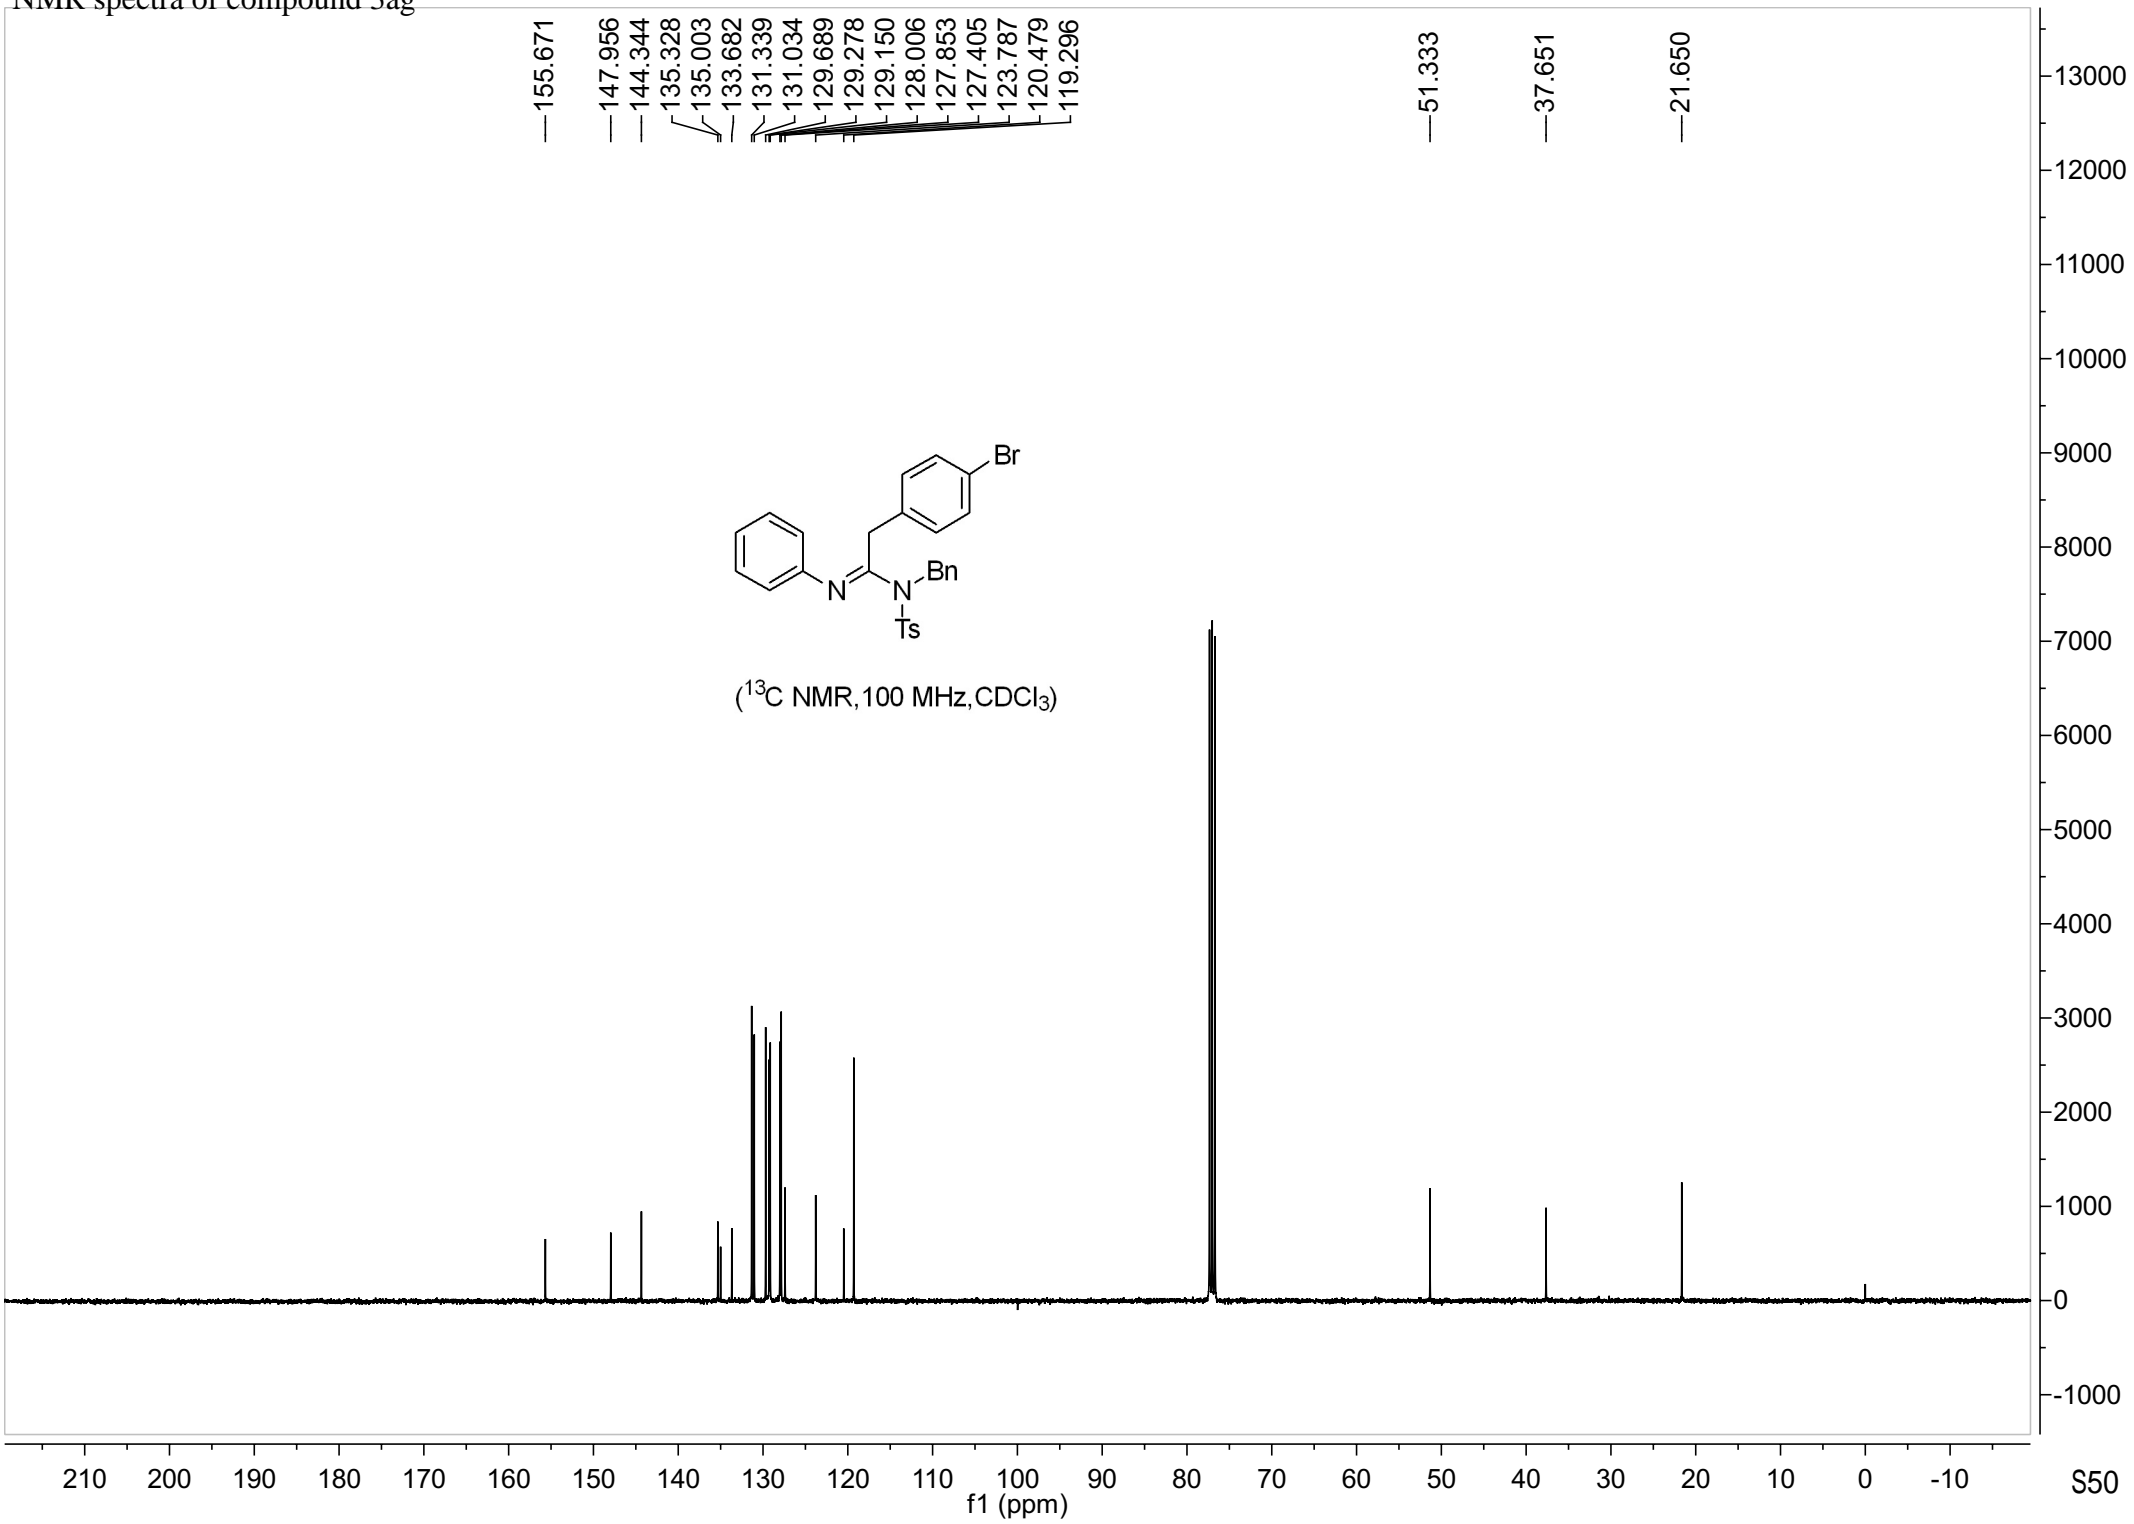

NMR spectra of compound 3ah

7.762  
7.741  
7.347  
7.327  
7.245  
7.226  
7.206  
7.180  
7.158  
7.143  
7.139  
7.122  
7.027  
7.005  
6.715  
6.693  
6.639  
6.617  
6.429  
6.411  
6.439

3.809  
3.778

2.454

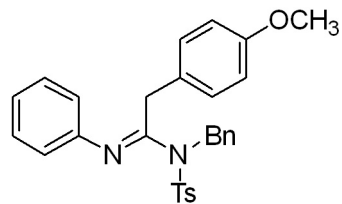

(<sup>1</sup>H NMR, 400 MHz, CDCl<sub>3</sub>)

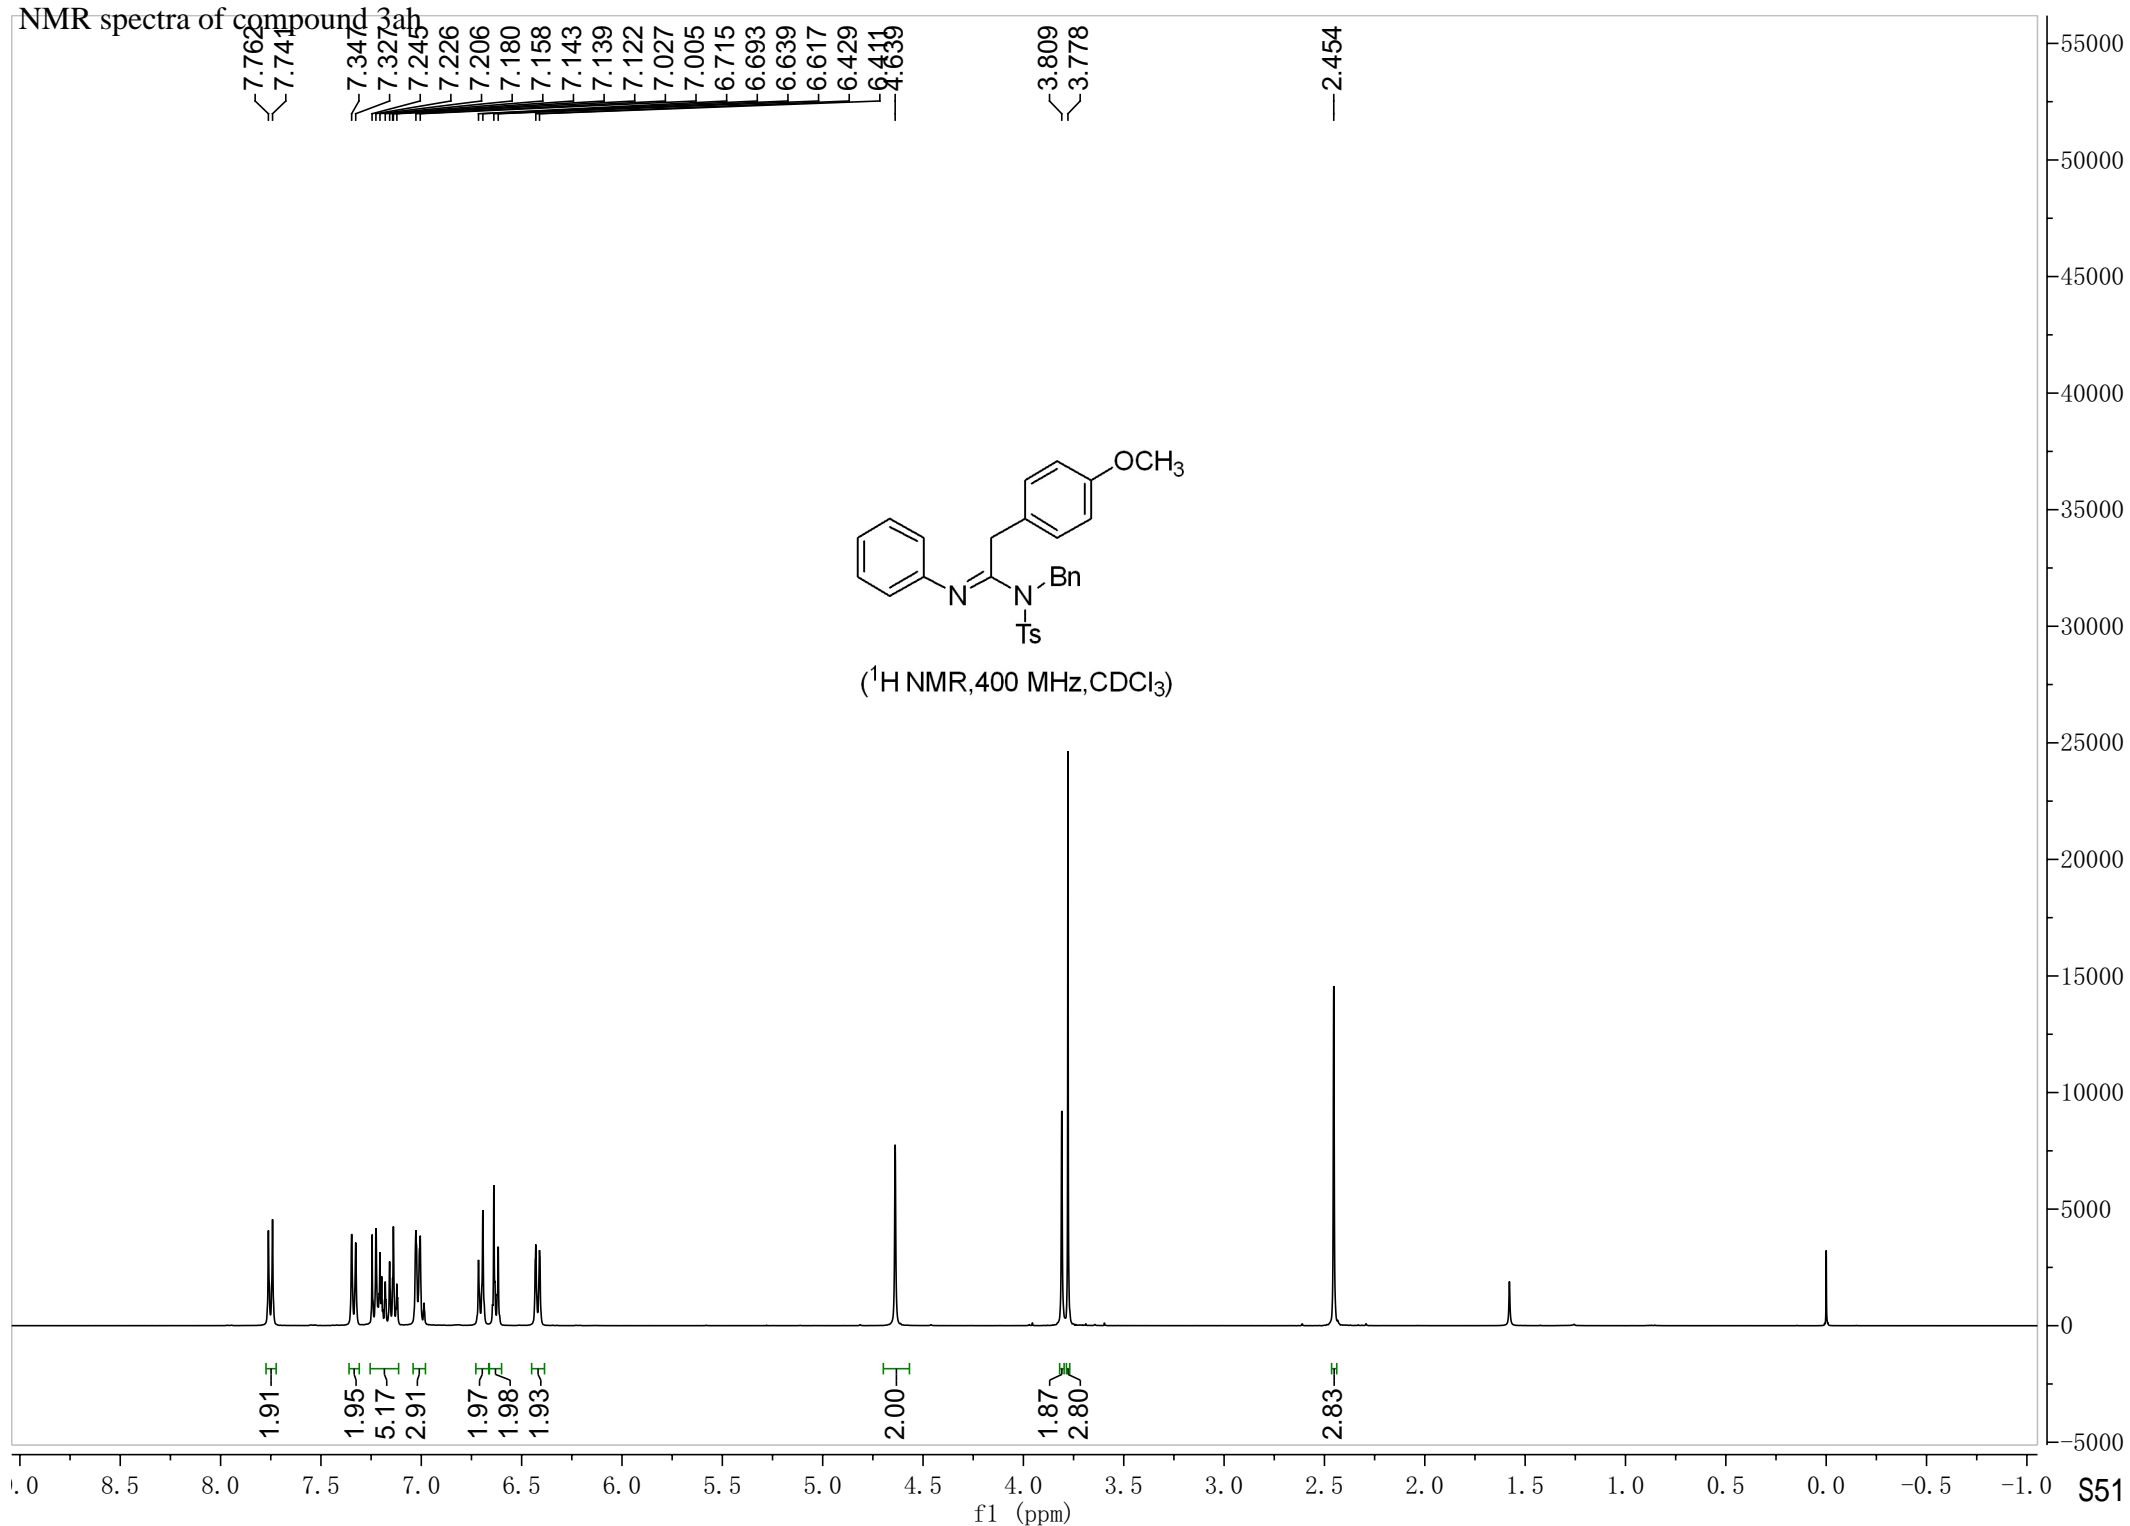

NMR spectra of compound 3ah

158.317  
156.108  
148.147  
144.139  
135.857  
135.423  
130.242  
129.532  
129.031  
128.885  
128.090  
128.004  
127.238  
126.717  
123.531  
119.492  
113.805

55.264

51.112

36.960

21.657

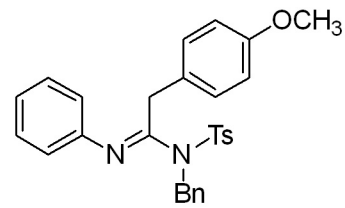

(<sup>13</sup>C NMR, 100 MHz, CDCl<sub>3</sub>)

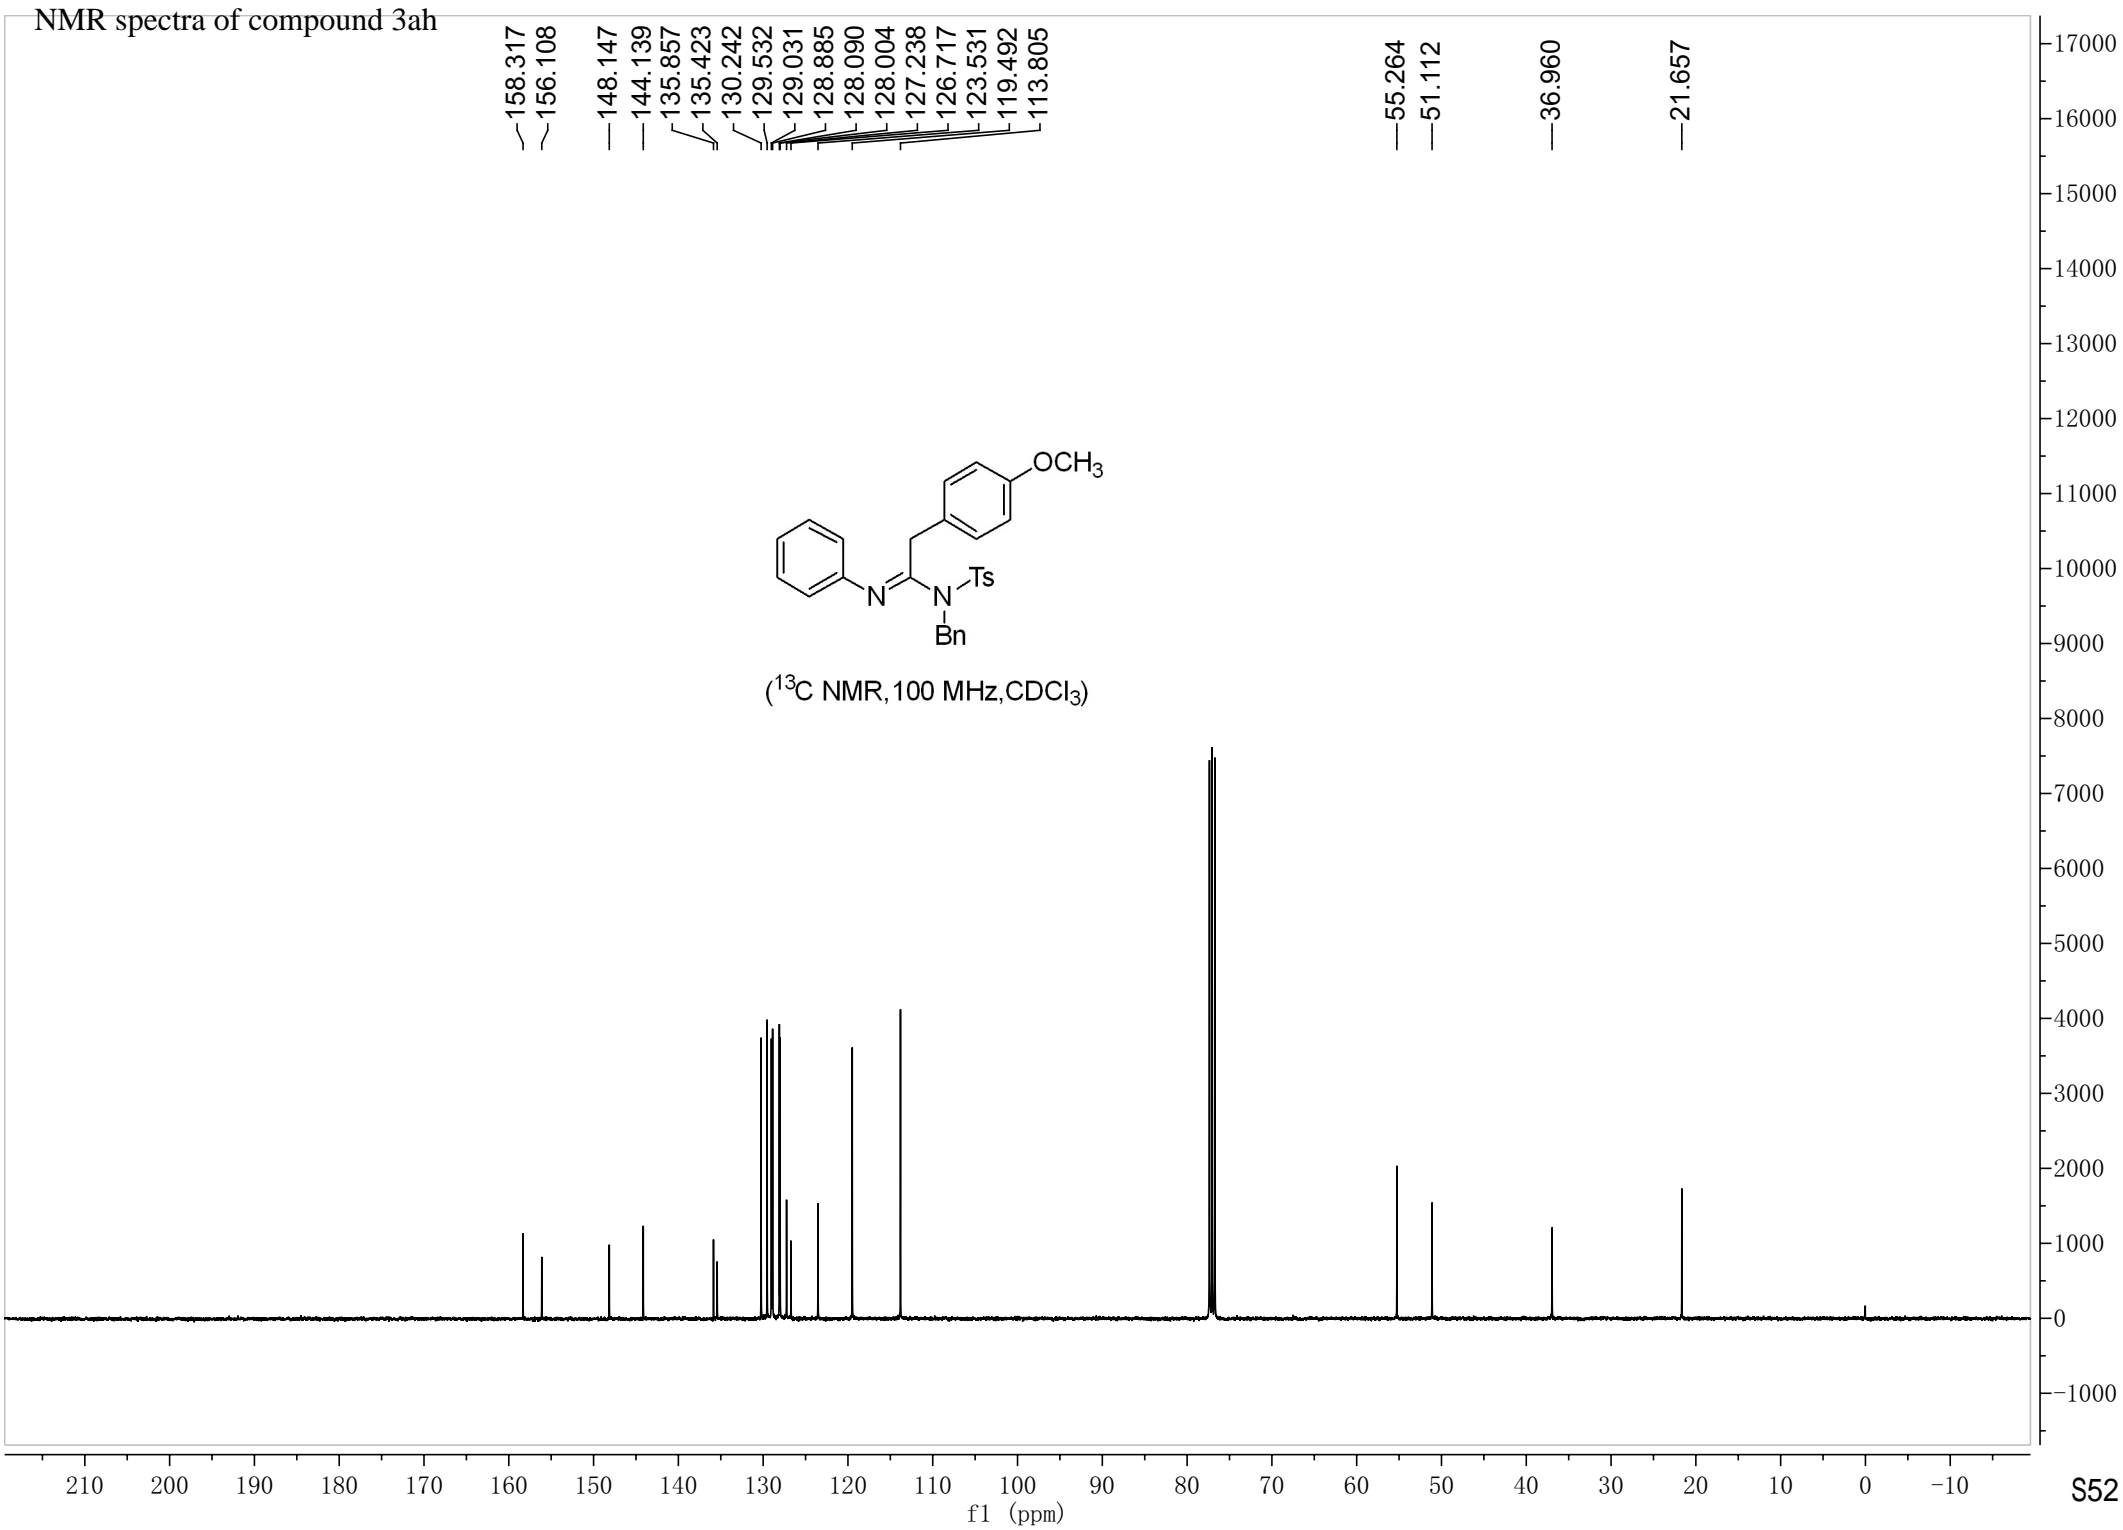



NMR spectra of compound 3ai

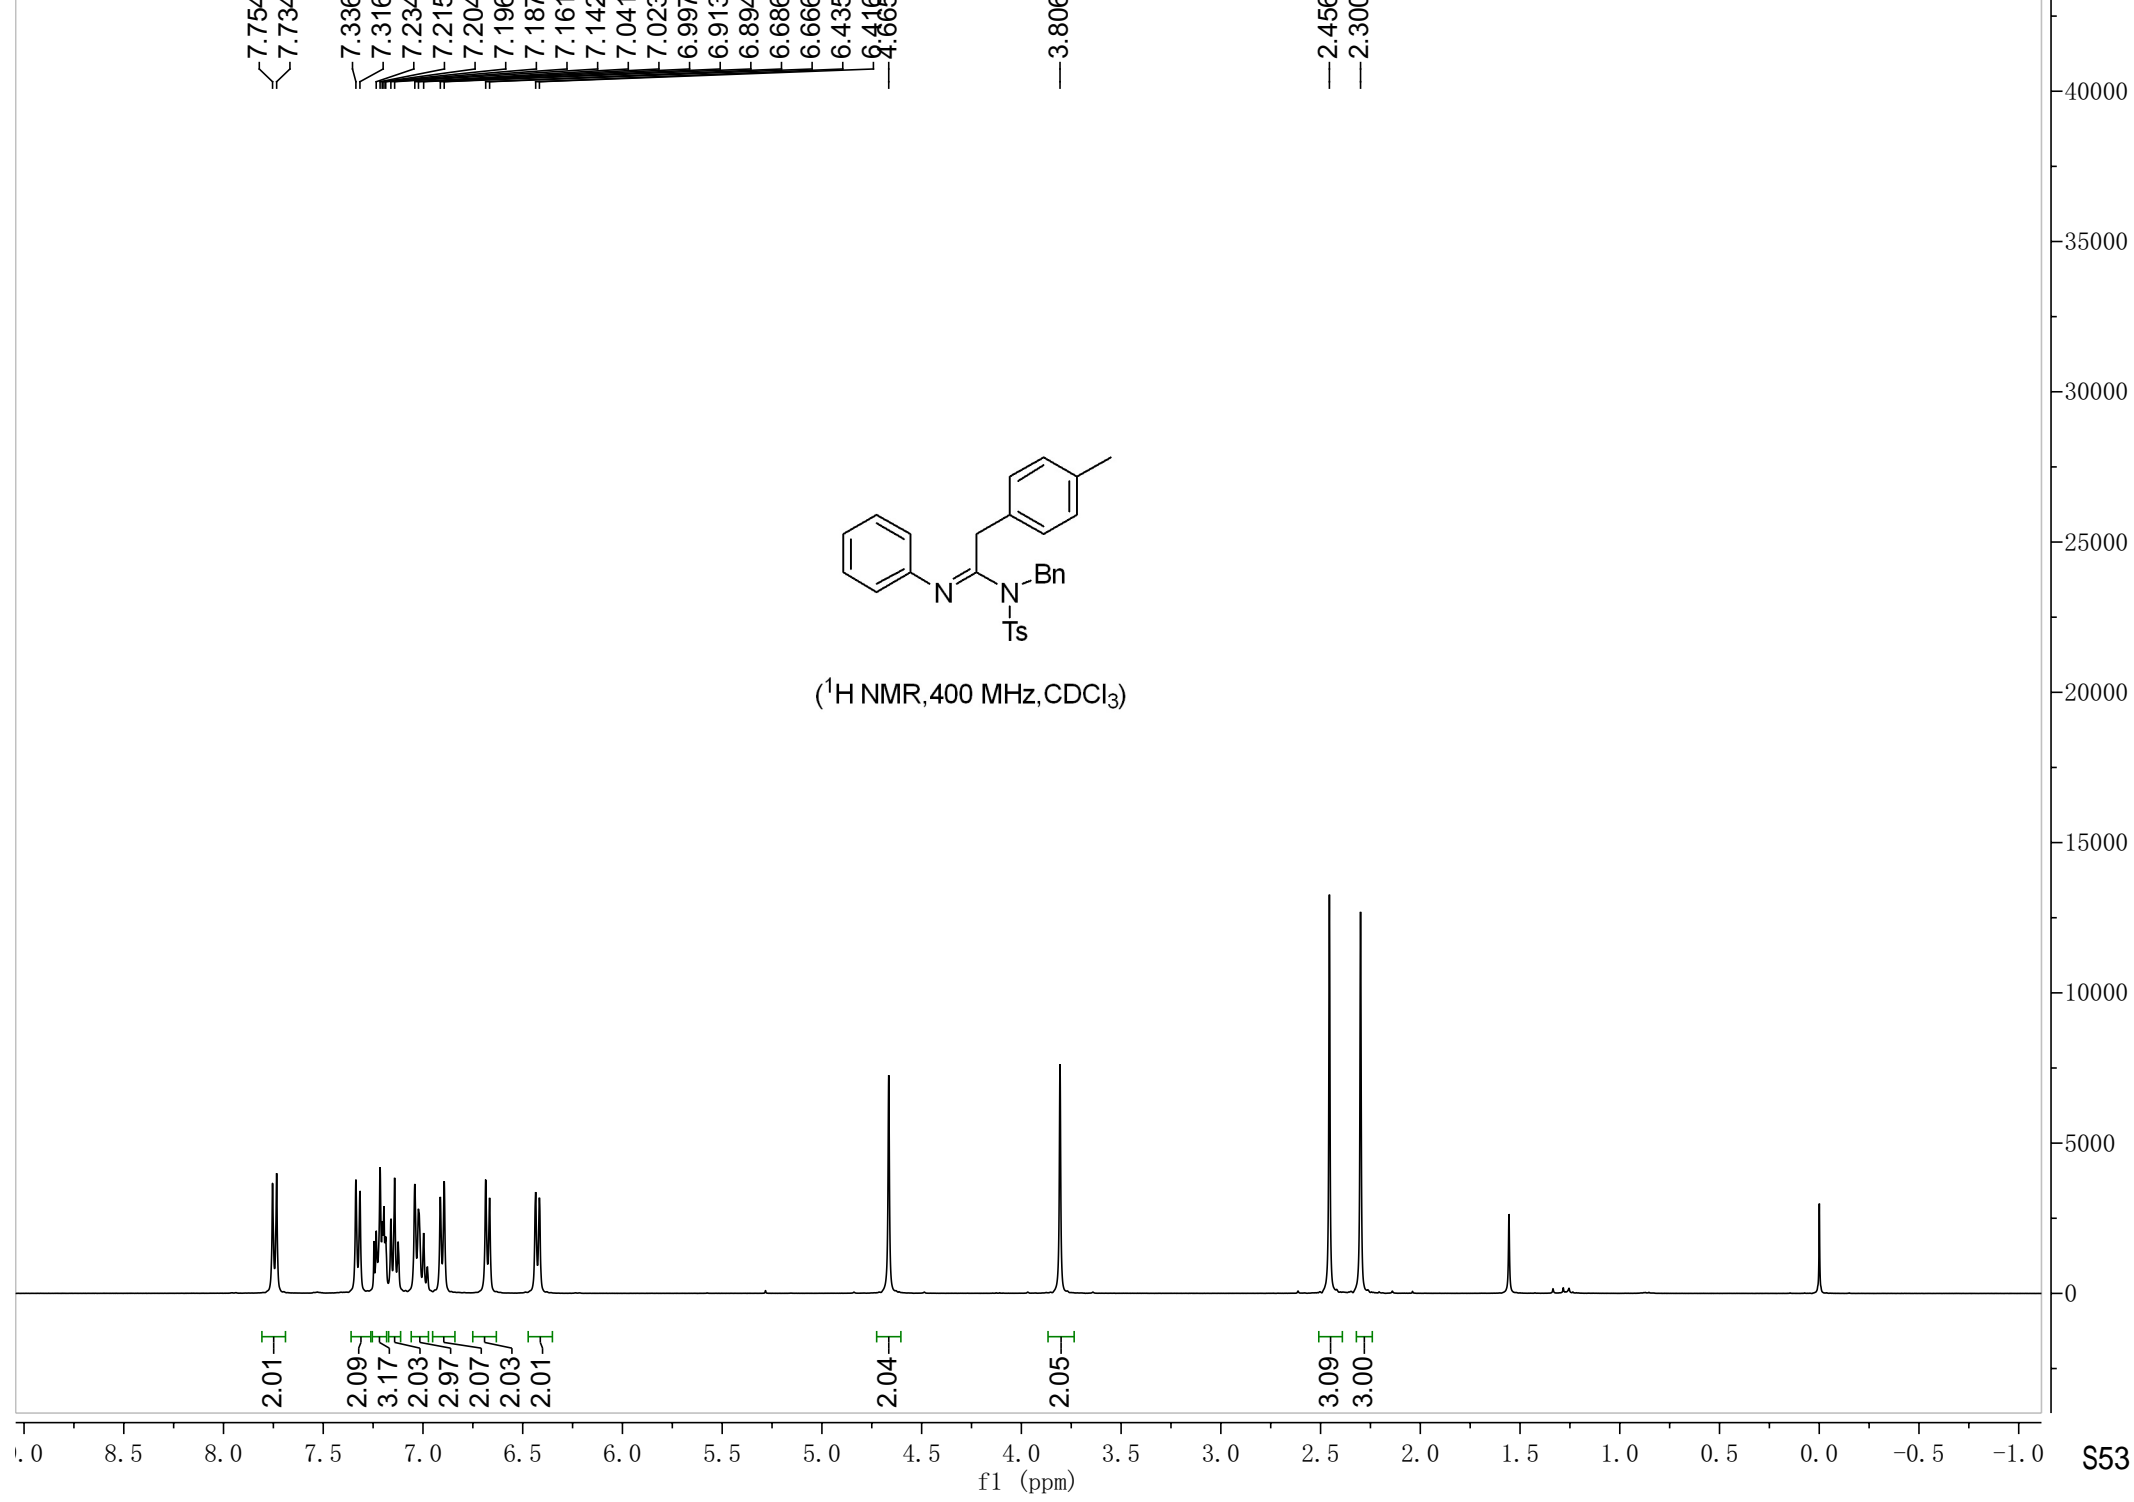

NMR spectra of compound 3ai

- 155.842
- 148.139
- 144.092
- 136.023
- 135.574
- 131.619
- 129.455
- 129.077
- 129.003
- 128.982
- 128.742
- 128.194
- 128.035
- 127.199
- 123.486
- 119.541

- 50.973
- 37.203
- 21.659
- 21.063

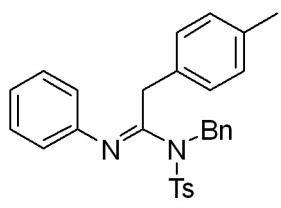

(<sup>13</sup>C NMR, 100 MHz, CDCl<sub>3</sub>)

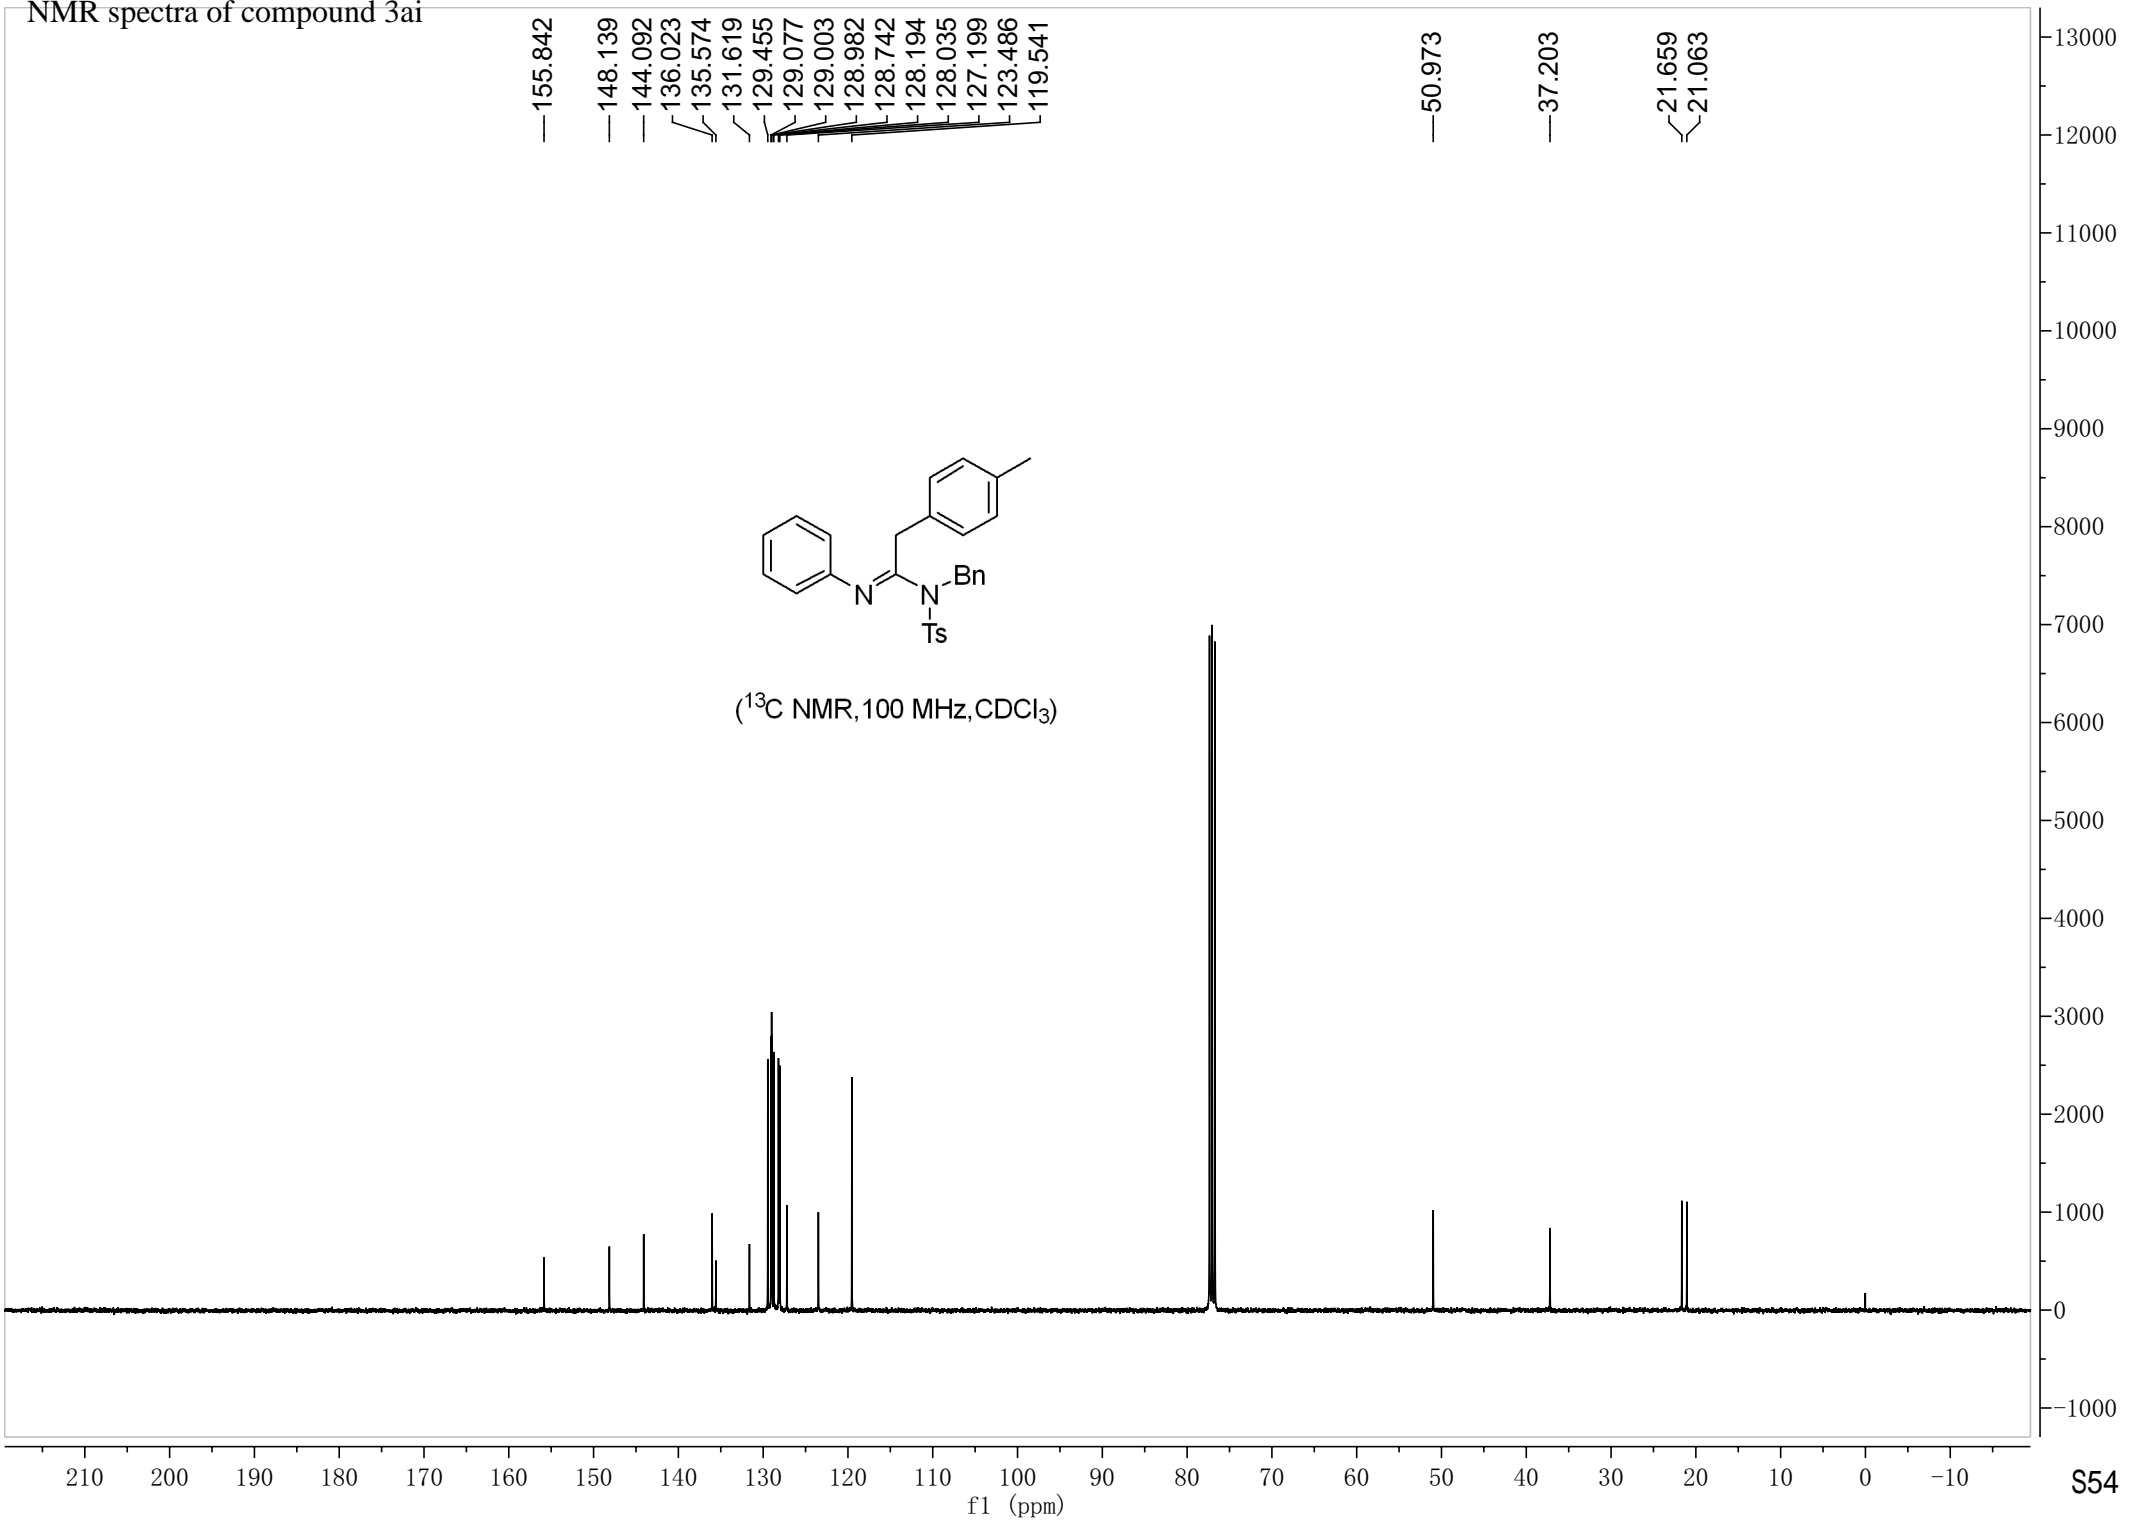

NMR spectra of compound 3aj

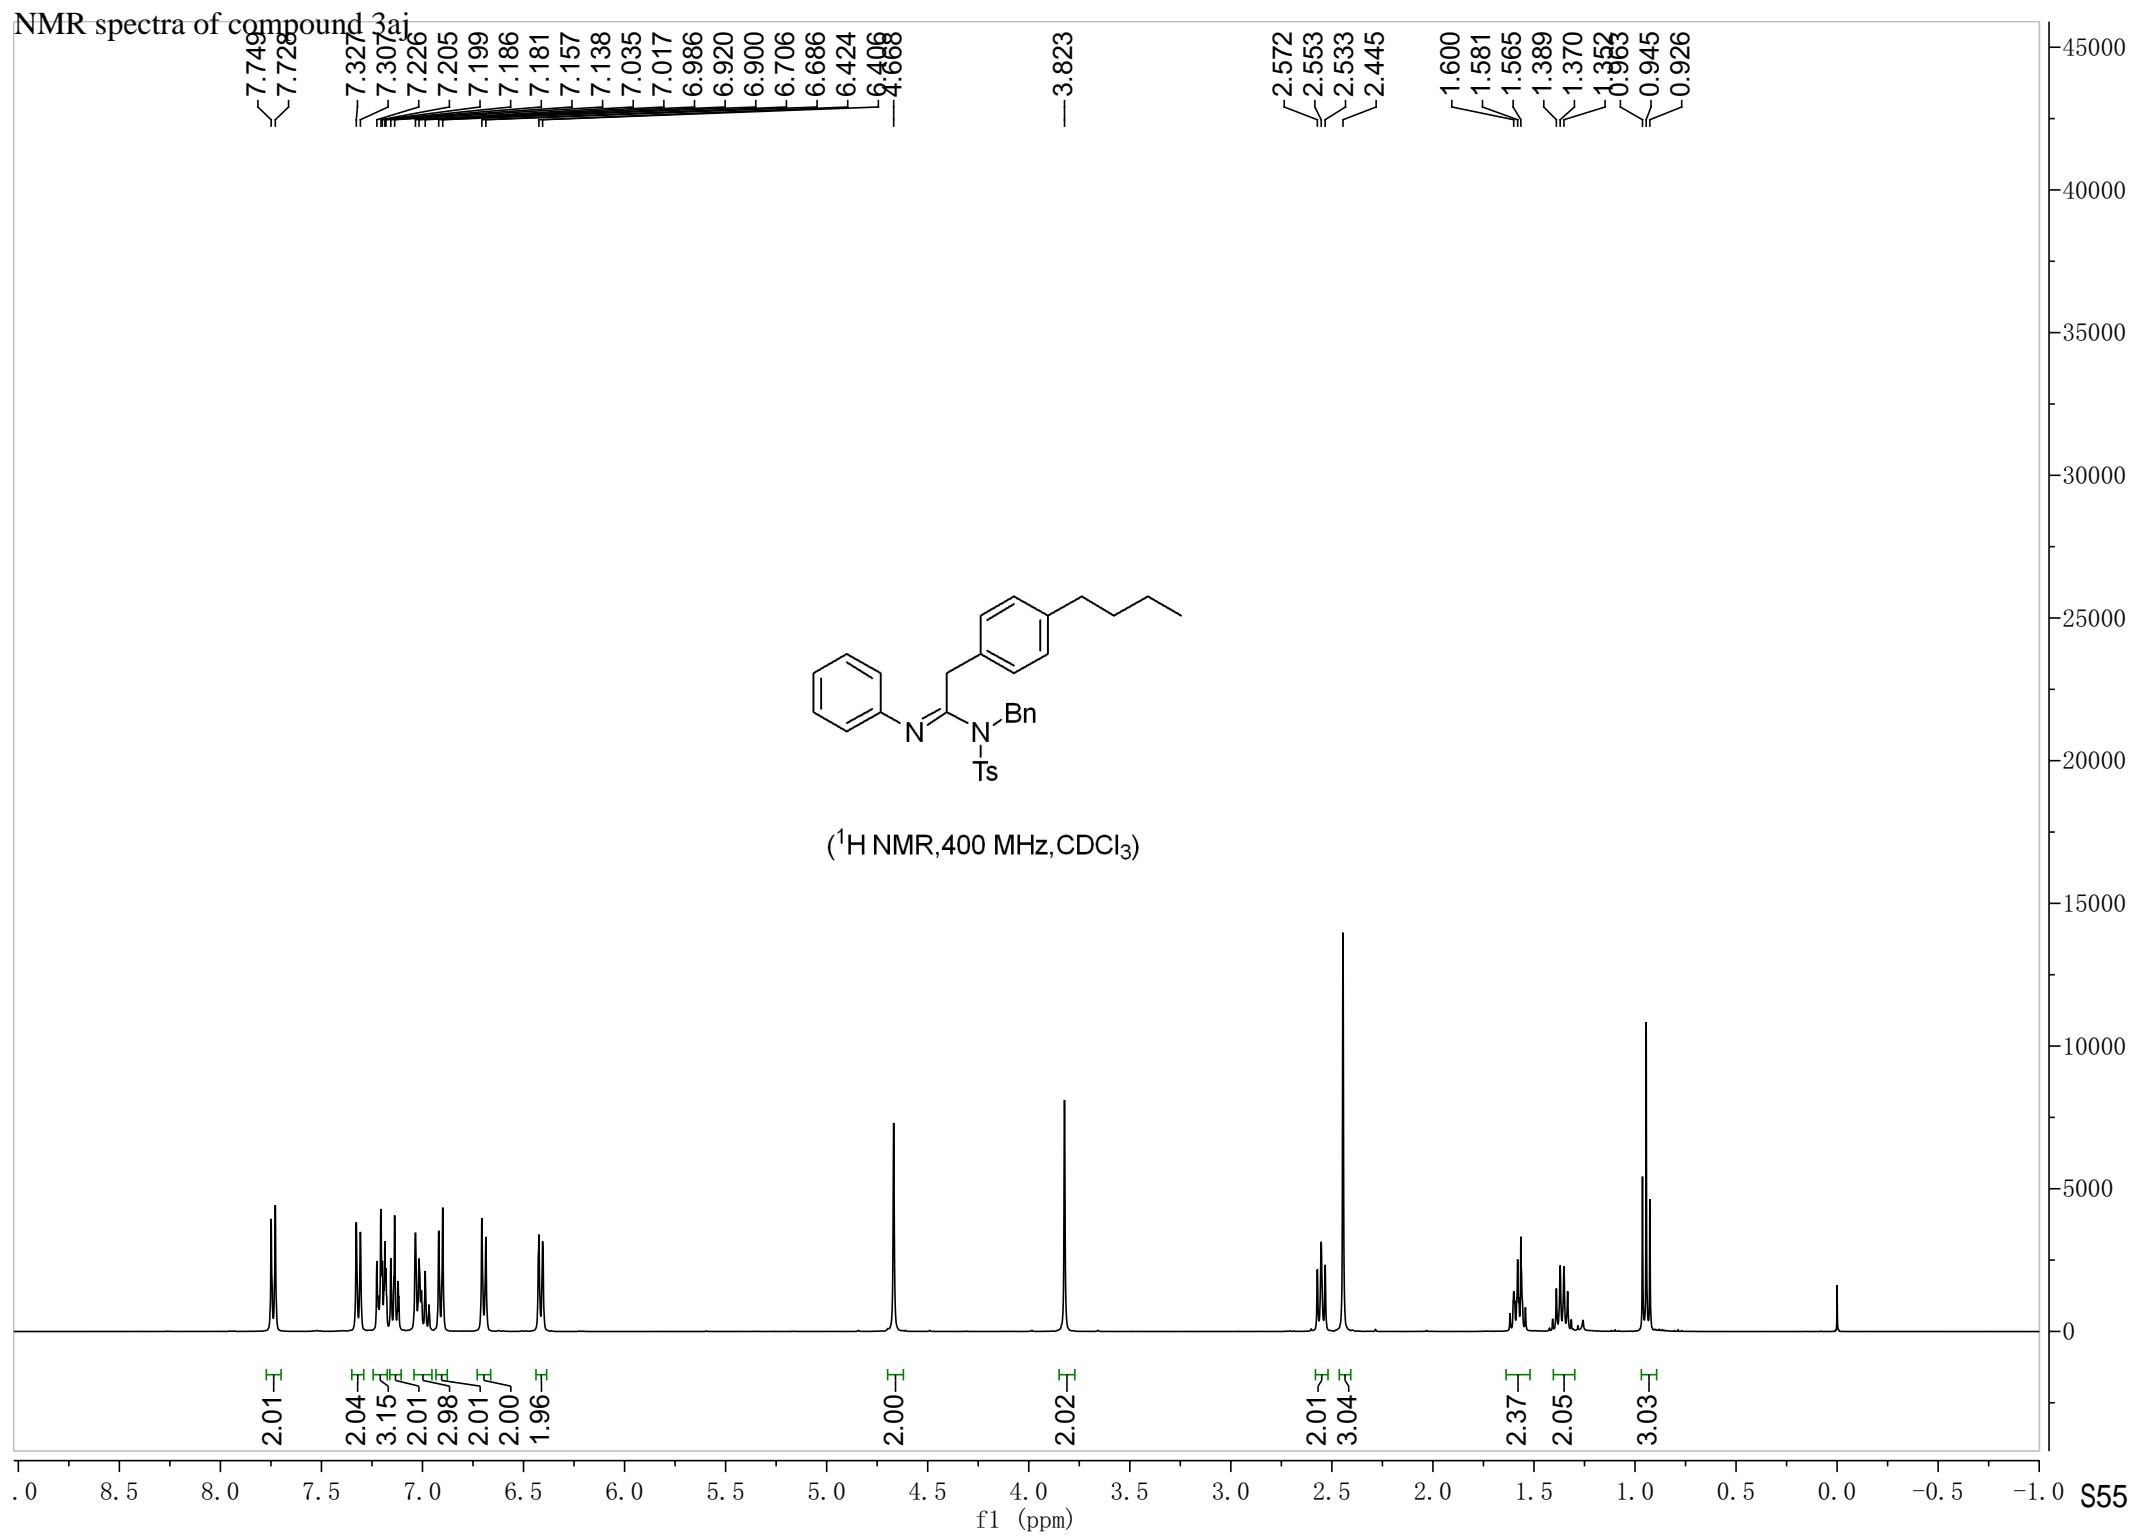

NMR spectra of compound 3aj

155.850  
148.158  
144.115  
141.116  
136.044  
135.552  
131.842  
129.482  
129.029  
129.011  
128.785  
128.444  
128.207  
128.054  
127.237  
123.489  
119.563

51.020

37.258  
35.278  
33.747

22.407  
21.672

14.022

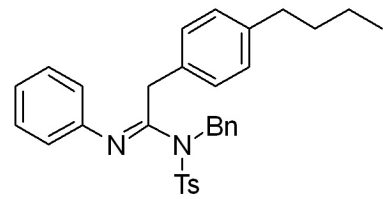

(<sup>13</sup>C NMR, 100 MHz, CDCl<sub>3</sub>)

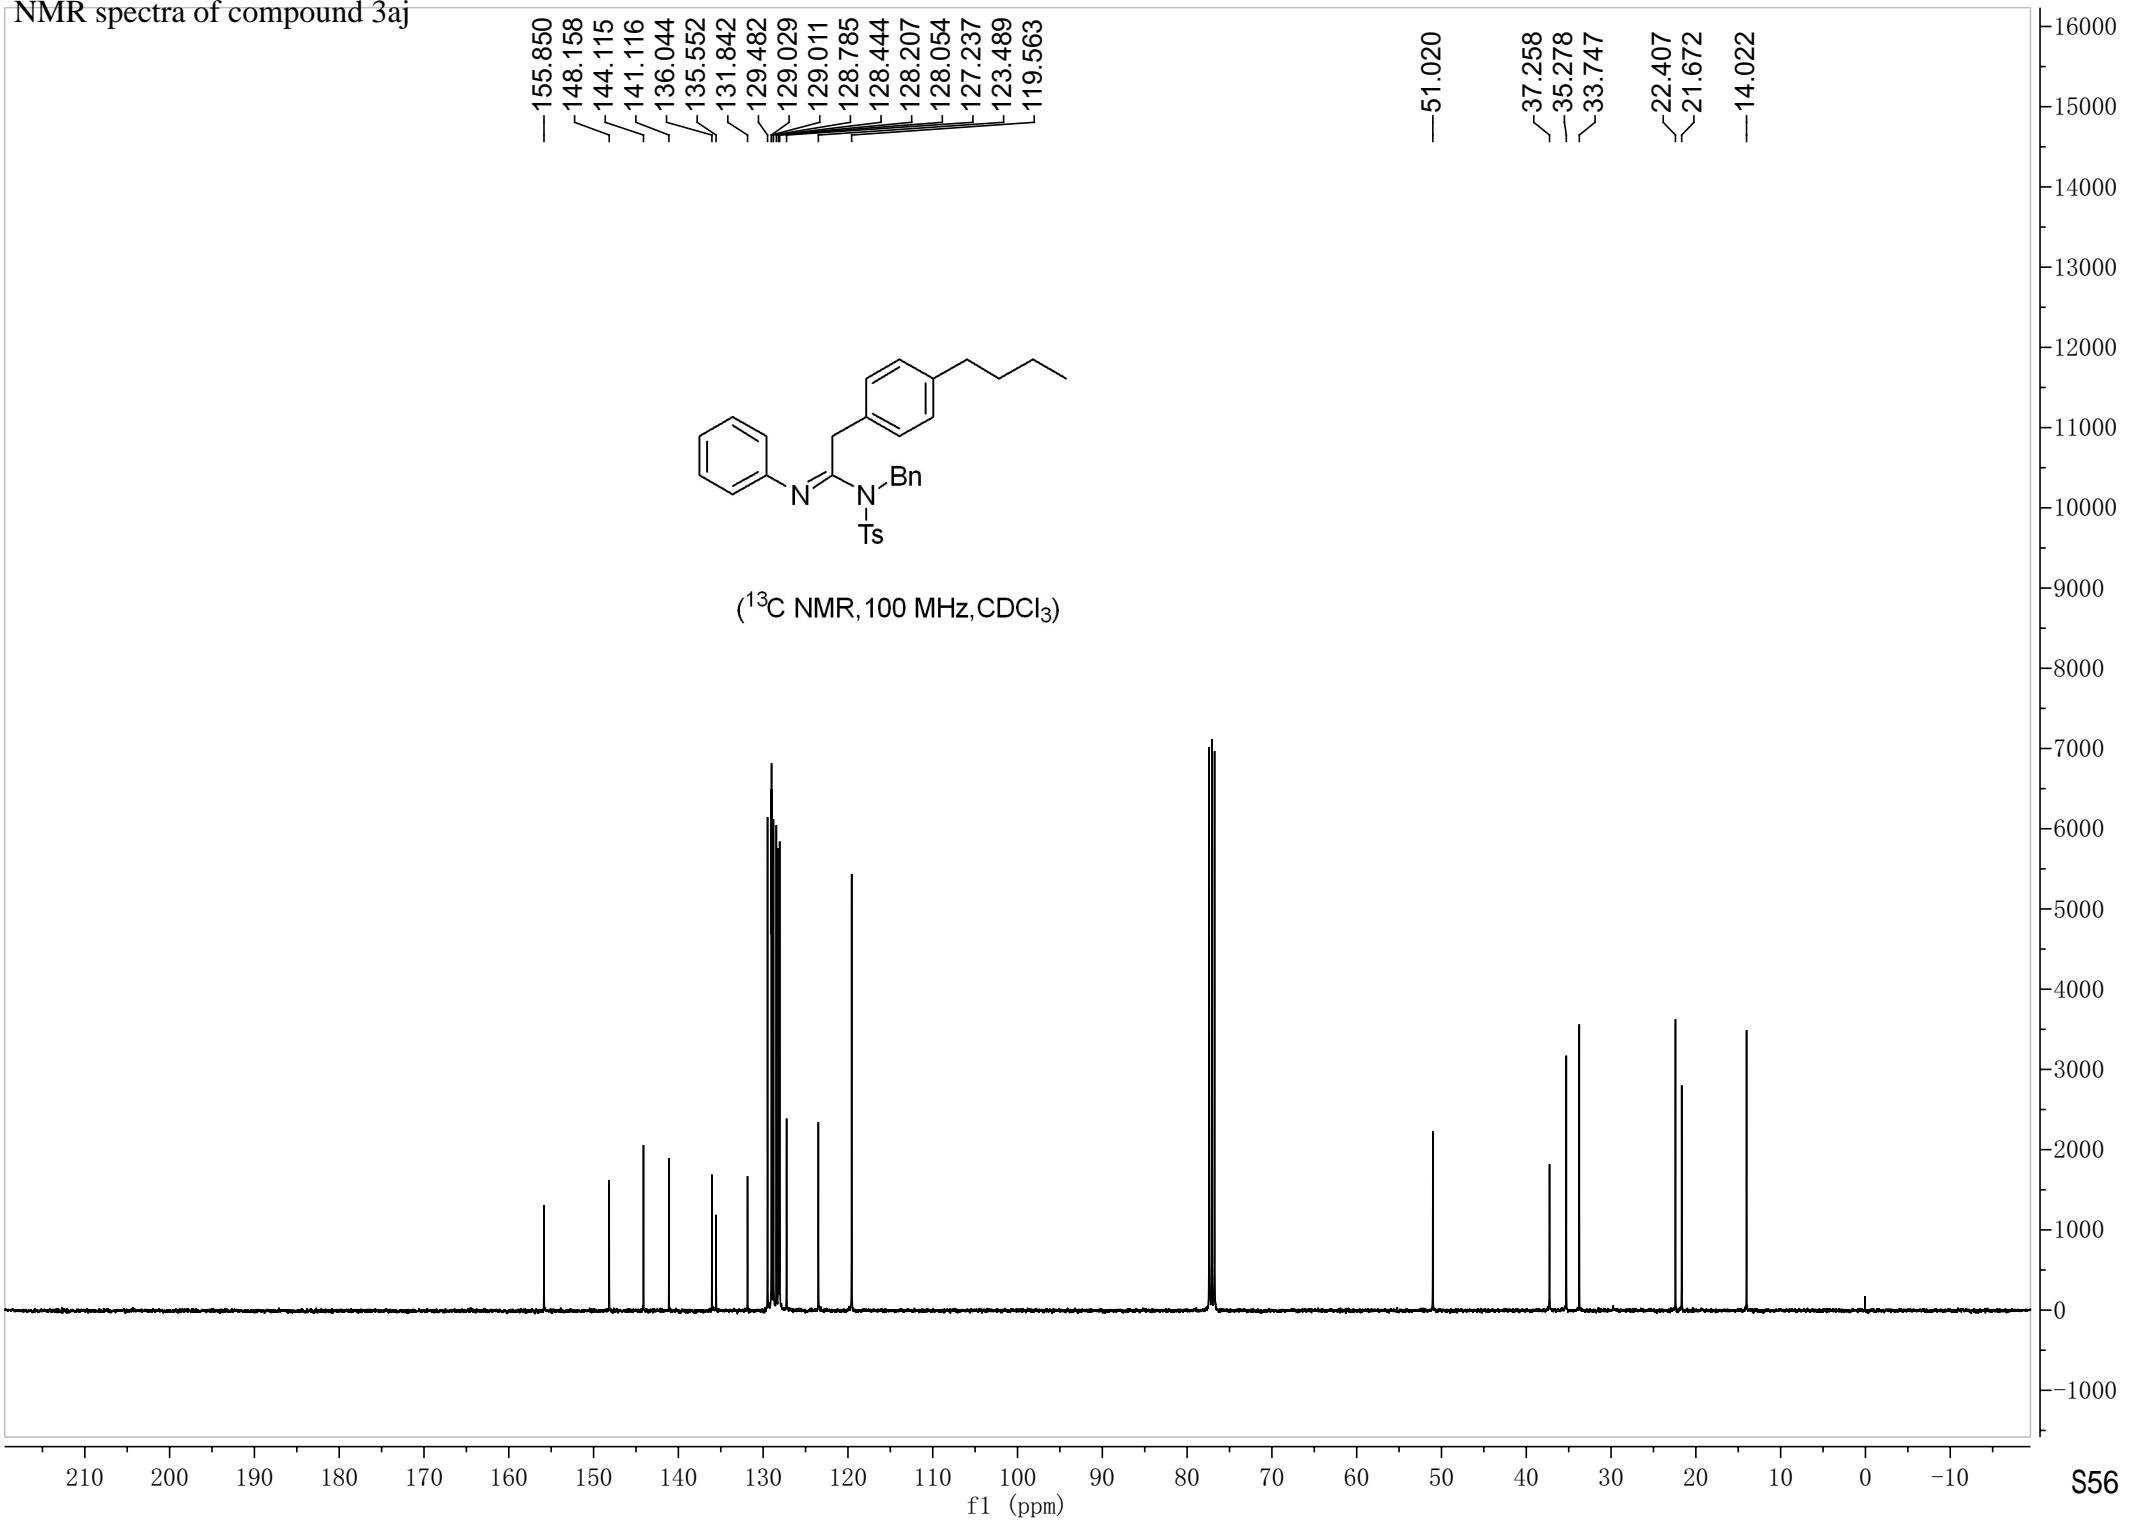



NMR spectra of compound 3ak

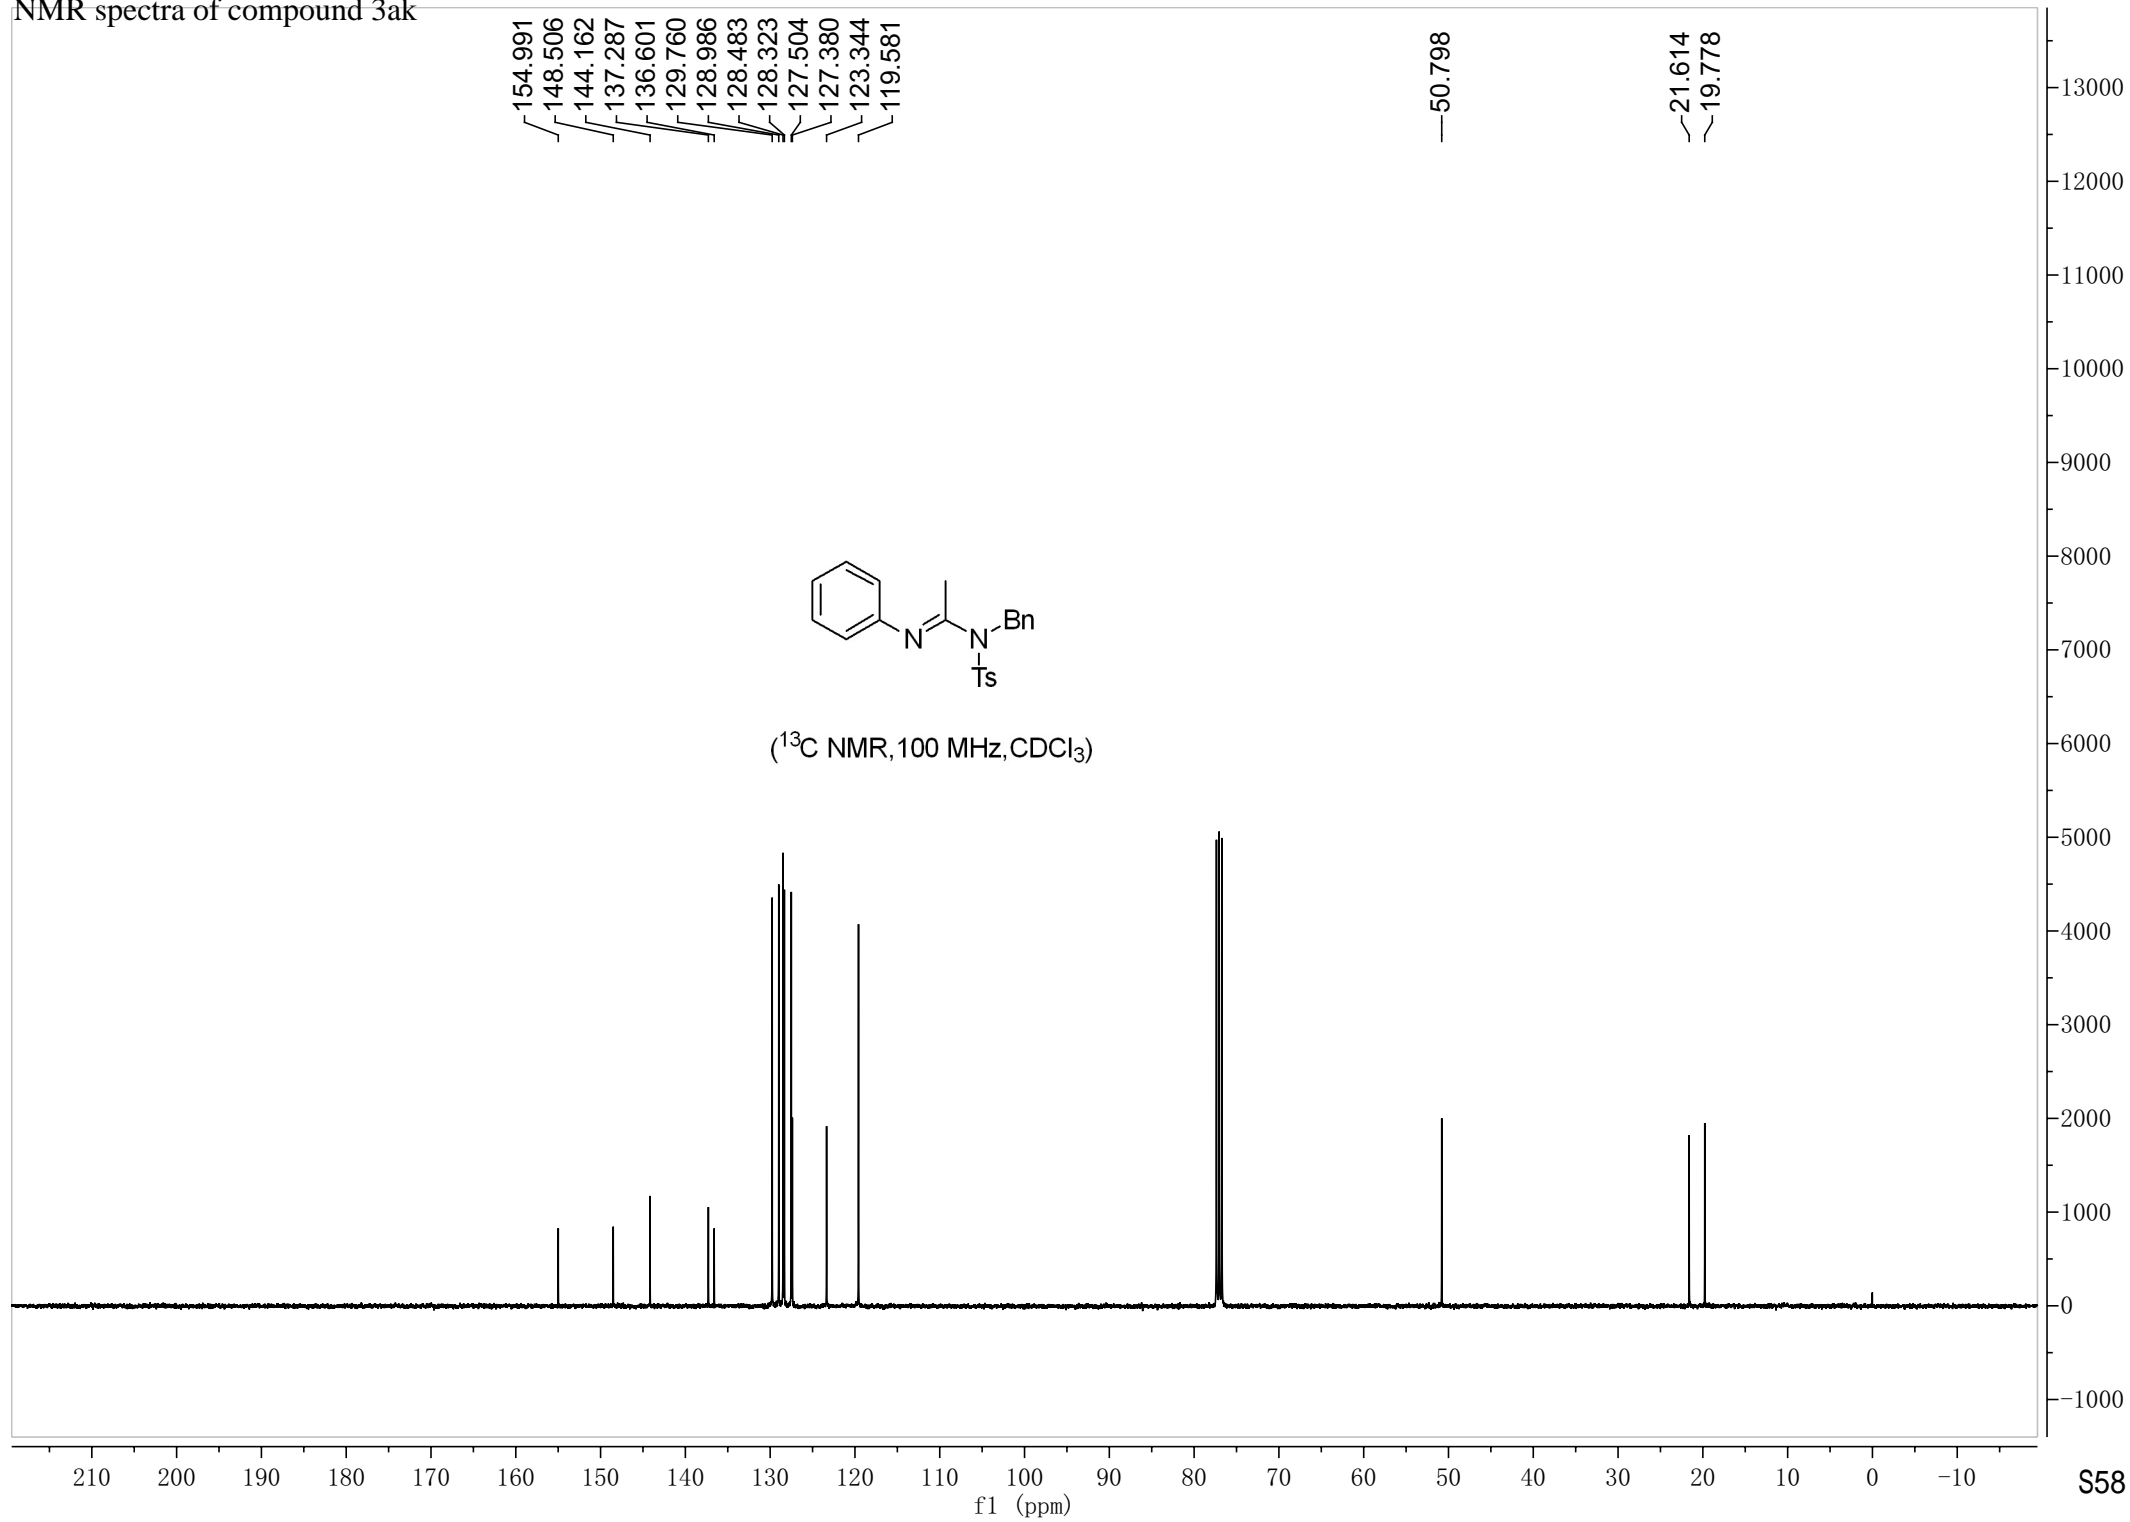

NMR spectra of compound 3al

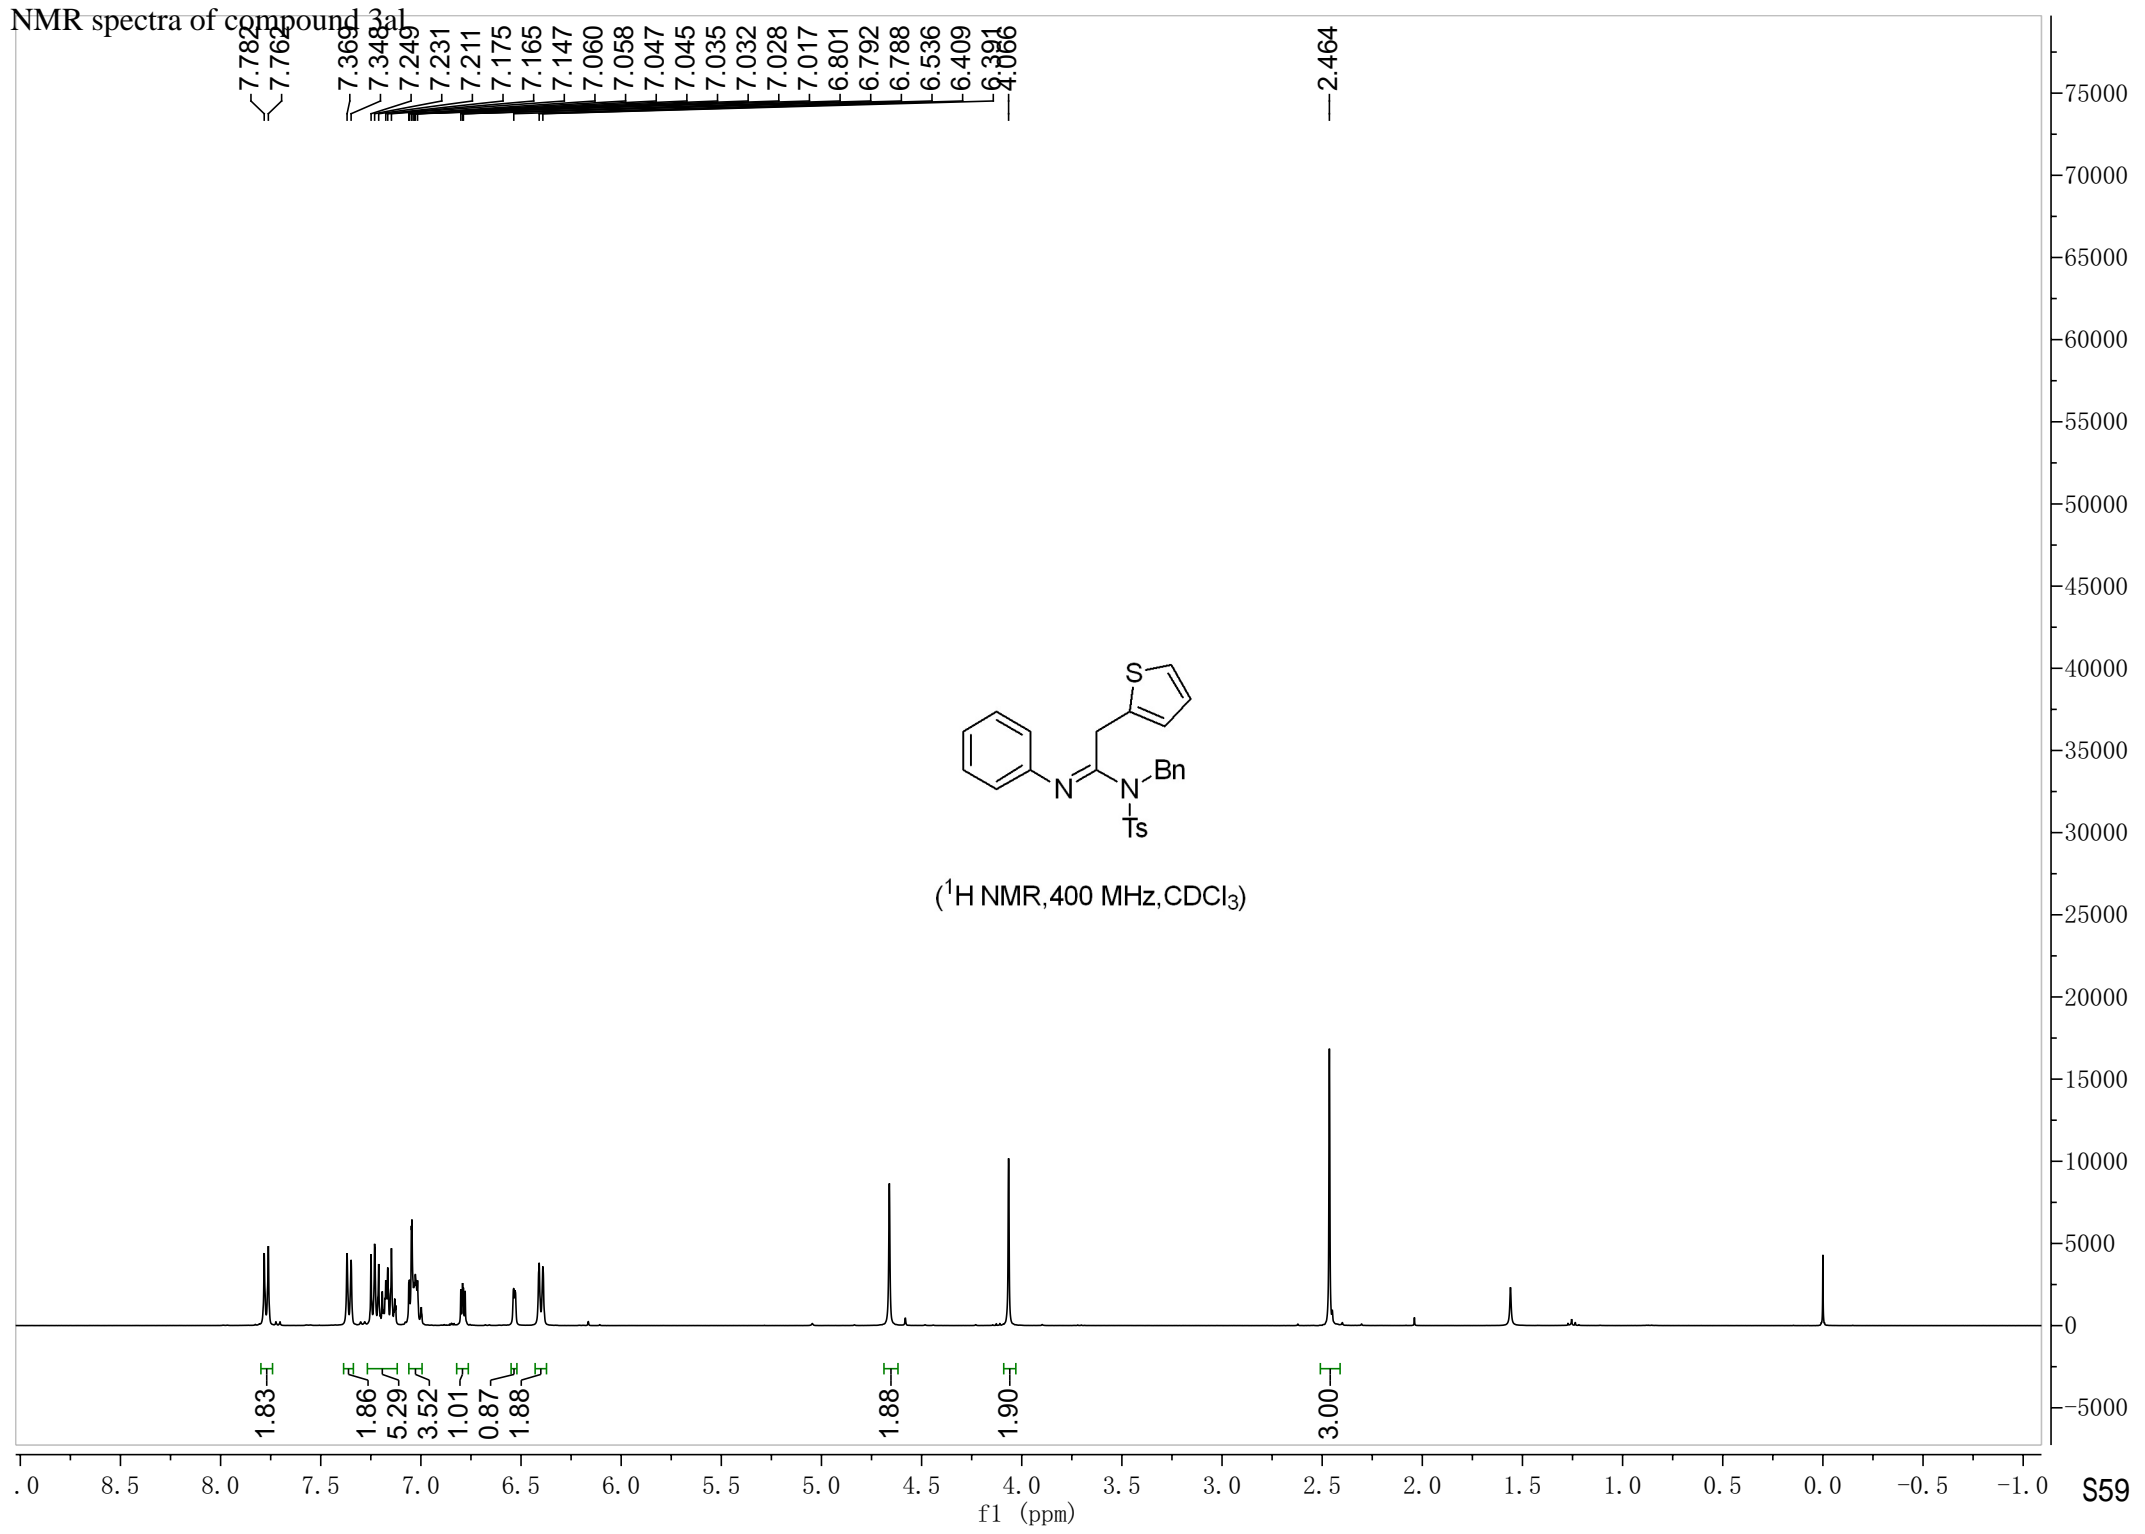

NMR spectra of compound 3al

154.874  
147.859  
144.255  
135.793  
135.239  
129.644  
129.073  
128.747  
128.041  
127.971  
127.284  
127.241  
126.687  
124.541  
123.664  
119.303

—51.349

—32.293

—21.667

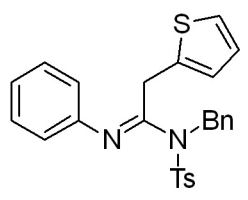

(<sup>13</sup>C NMR, 100 MHz, CDCl<sub>3</sub>)

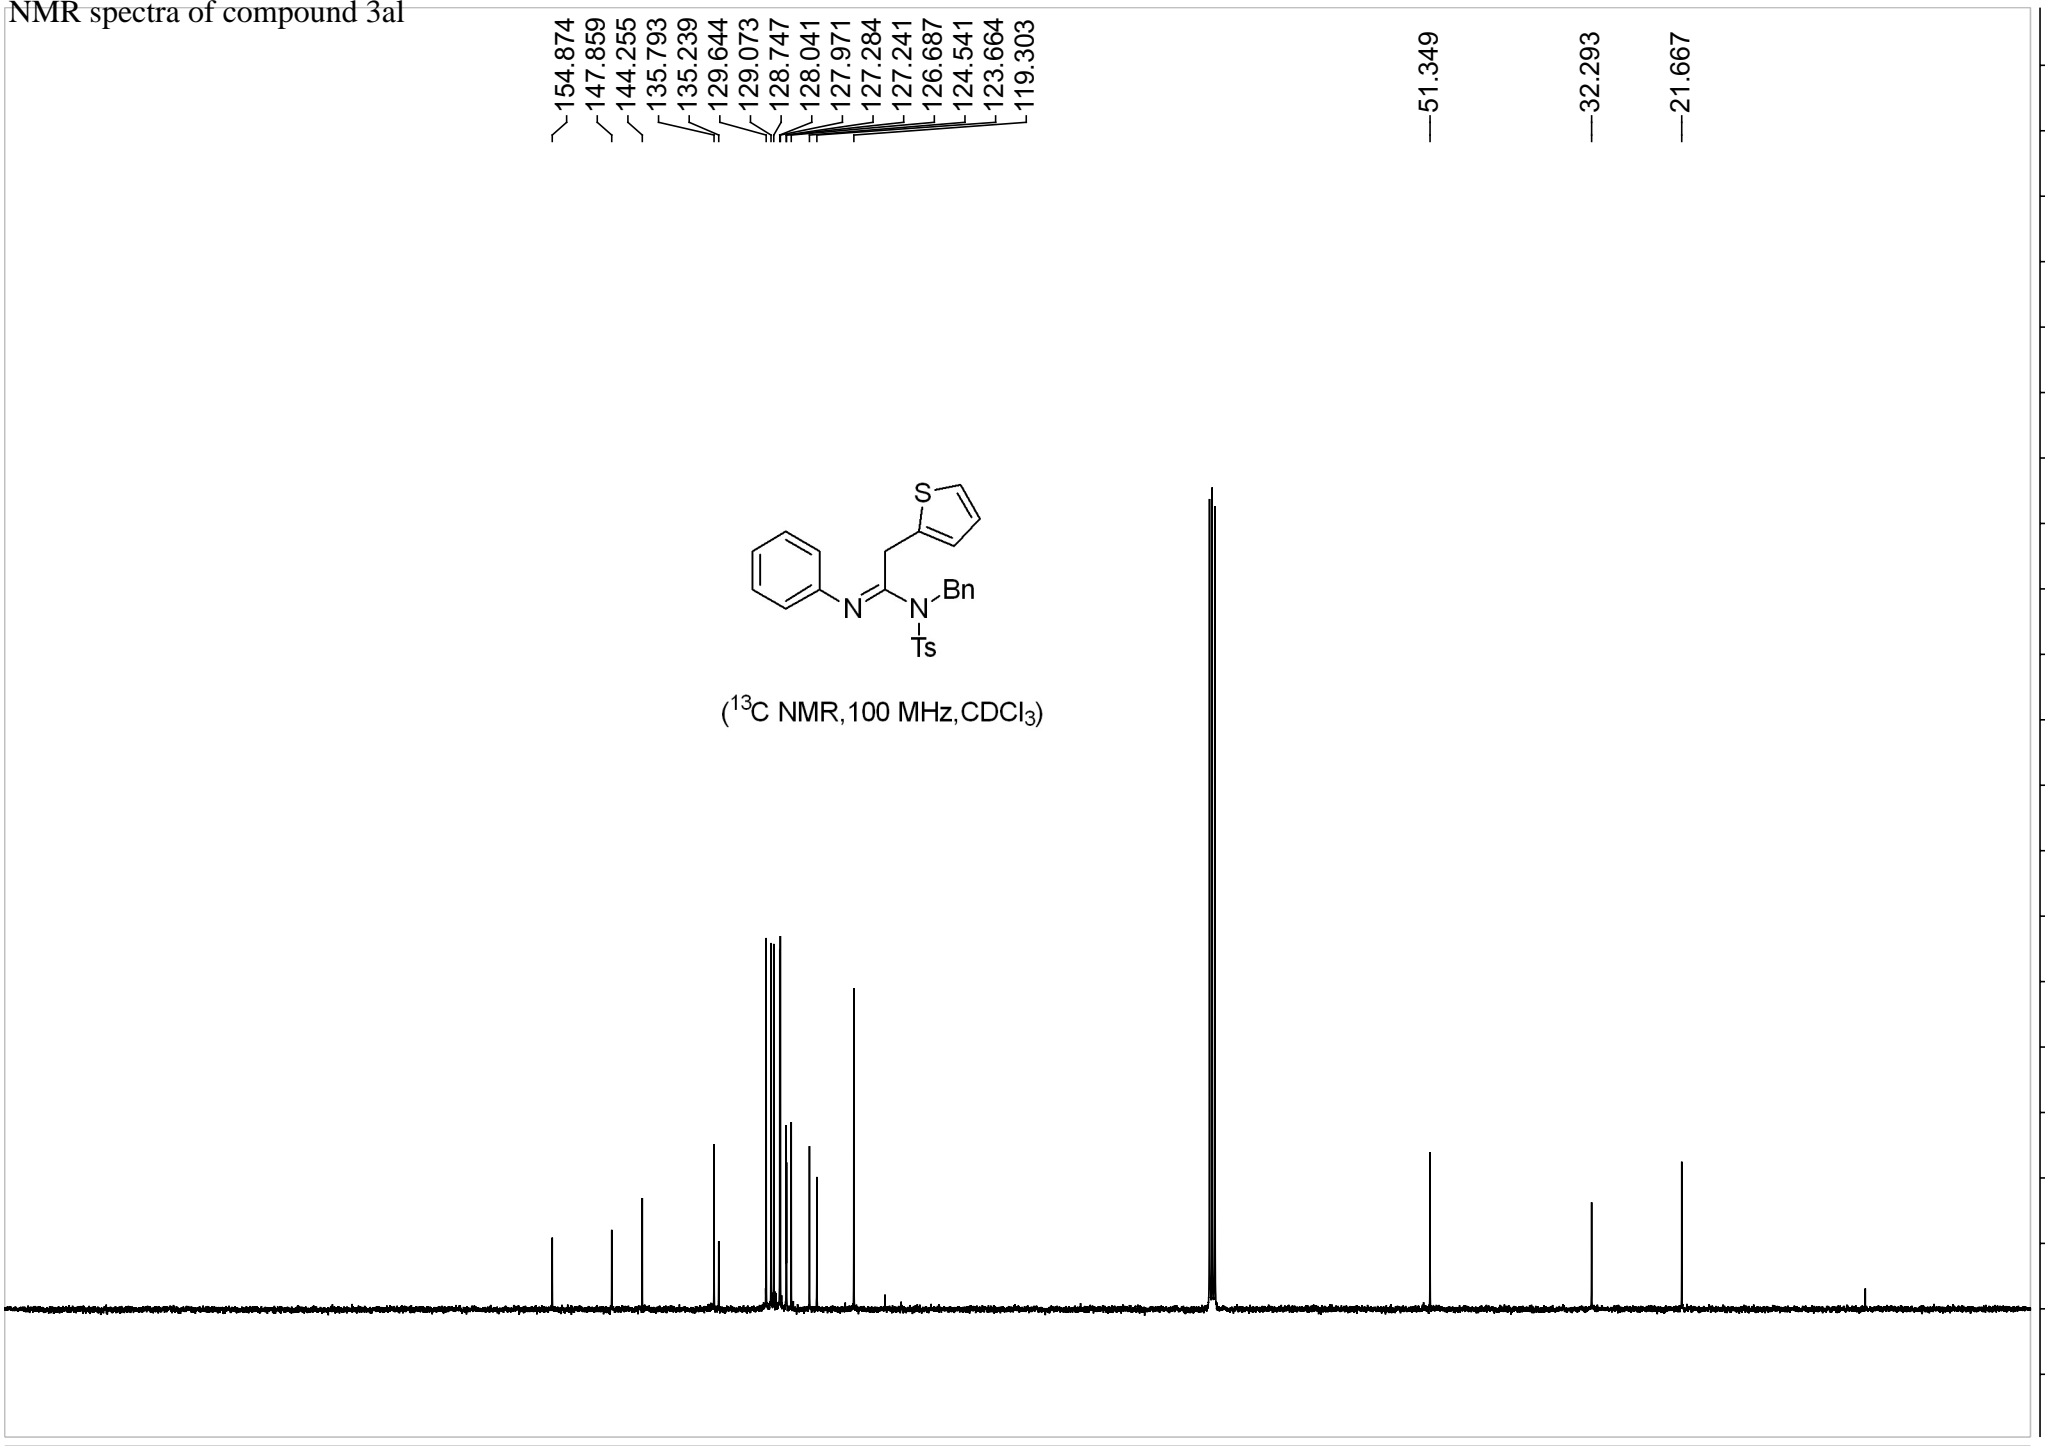

210 200 190 180 170 160 150 140 130 120 110 100 90 80 70 60 50 40 30 20 10 0 -10

f1 (ppm)



NMR spectra of compound 3dk

7.773  
7.752  
7.424  
7.371  
7.354  
7.350  
6.820  
6.798

6.388  
6.366

5.029

3.777

2.474

2.094

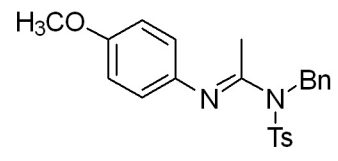

(<sup>1</sup>H NMR, 400 MHz, CDCl<sub>3</sub>)

1.98

2.00  
4.95

1.99

1.95

1.99

3.00

3.02

3.00

8.5 8.0 7.5 7.0 6.5 6.0 5.5 5.0 4.5 4.0 3.5 3.0 2.5 2.0 1.5 1.0 0.5 0.0 -0.5

f1 (ppm)

S61

NMR spectra of compound 3dk

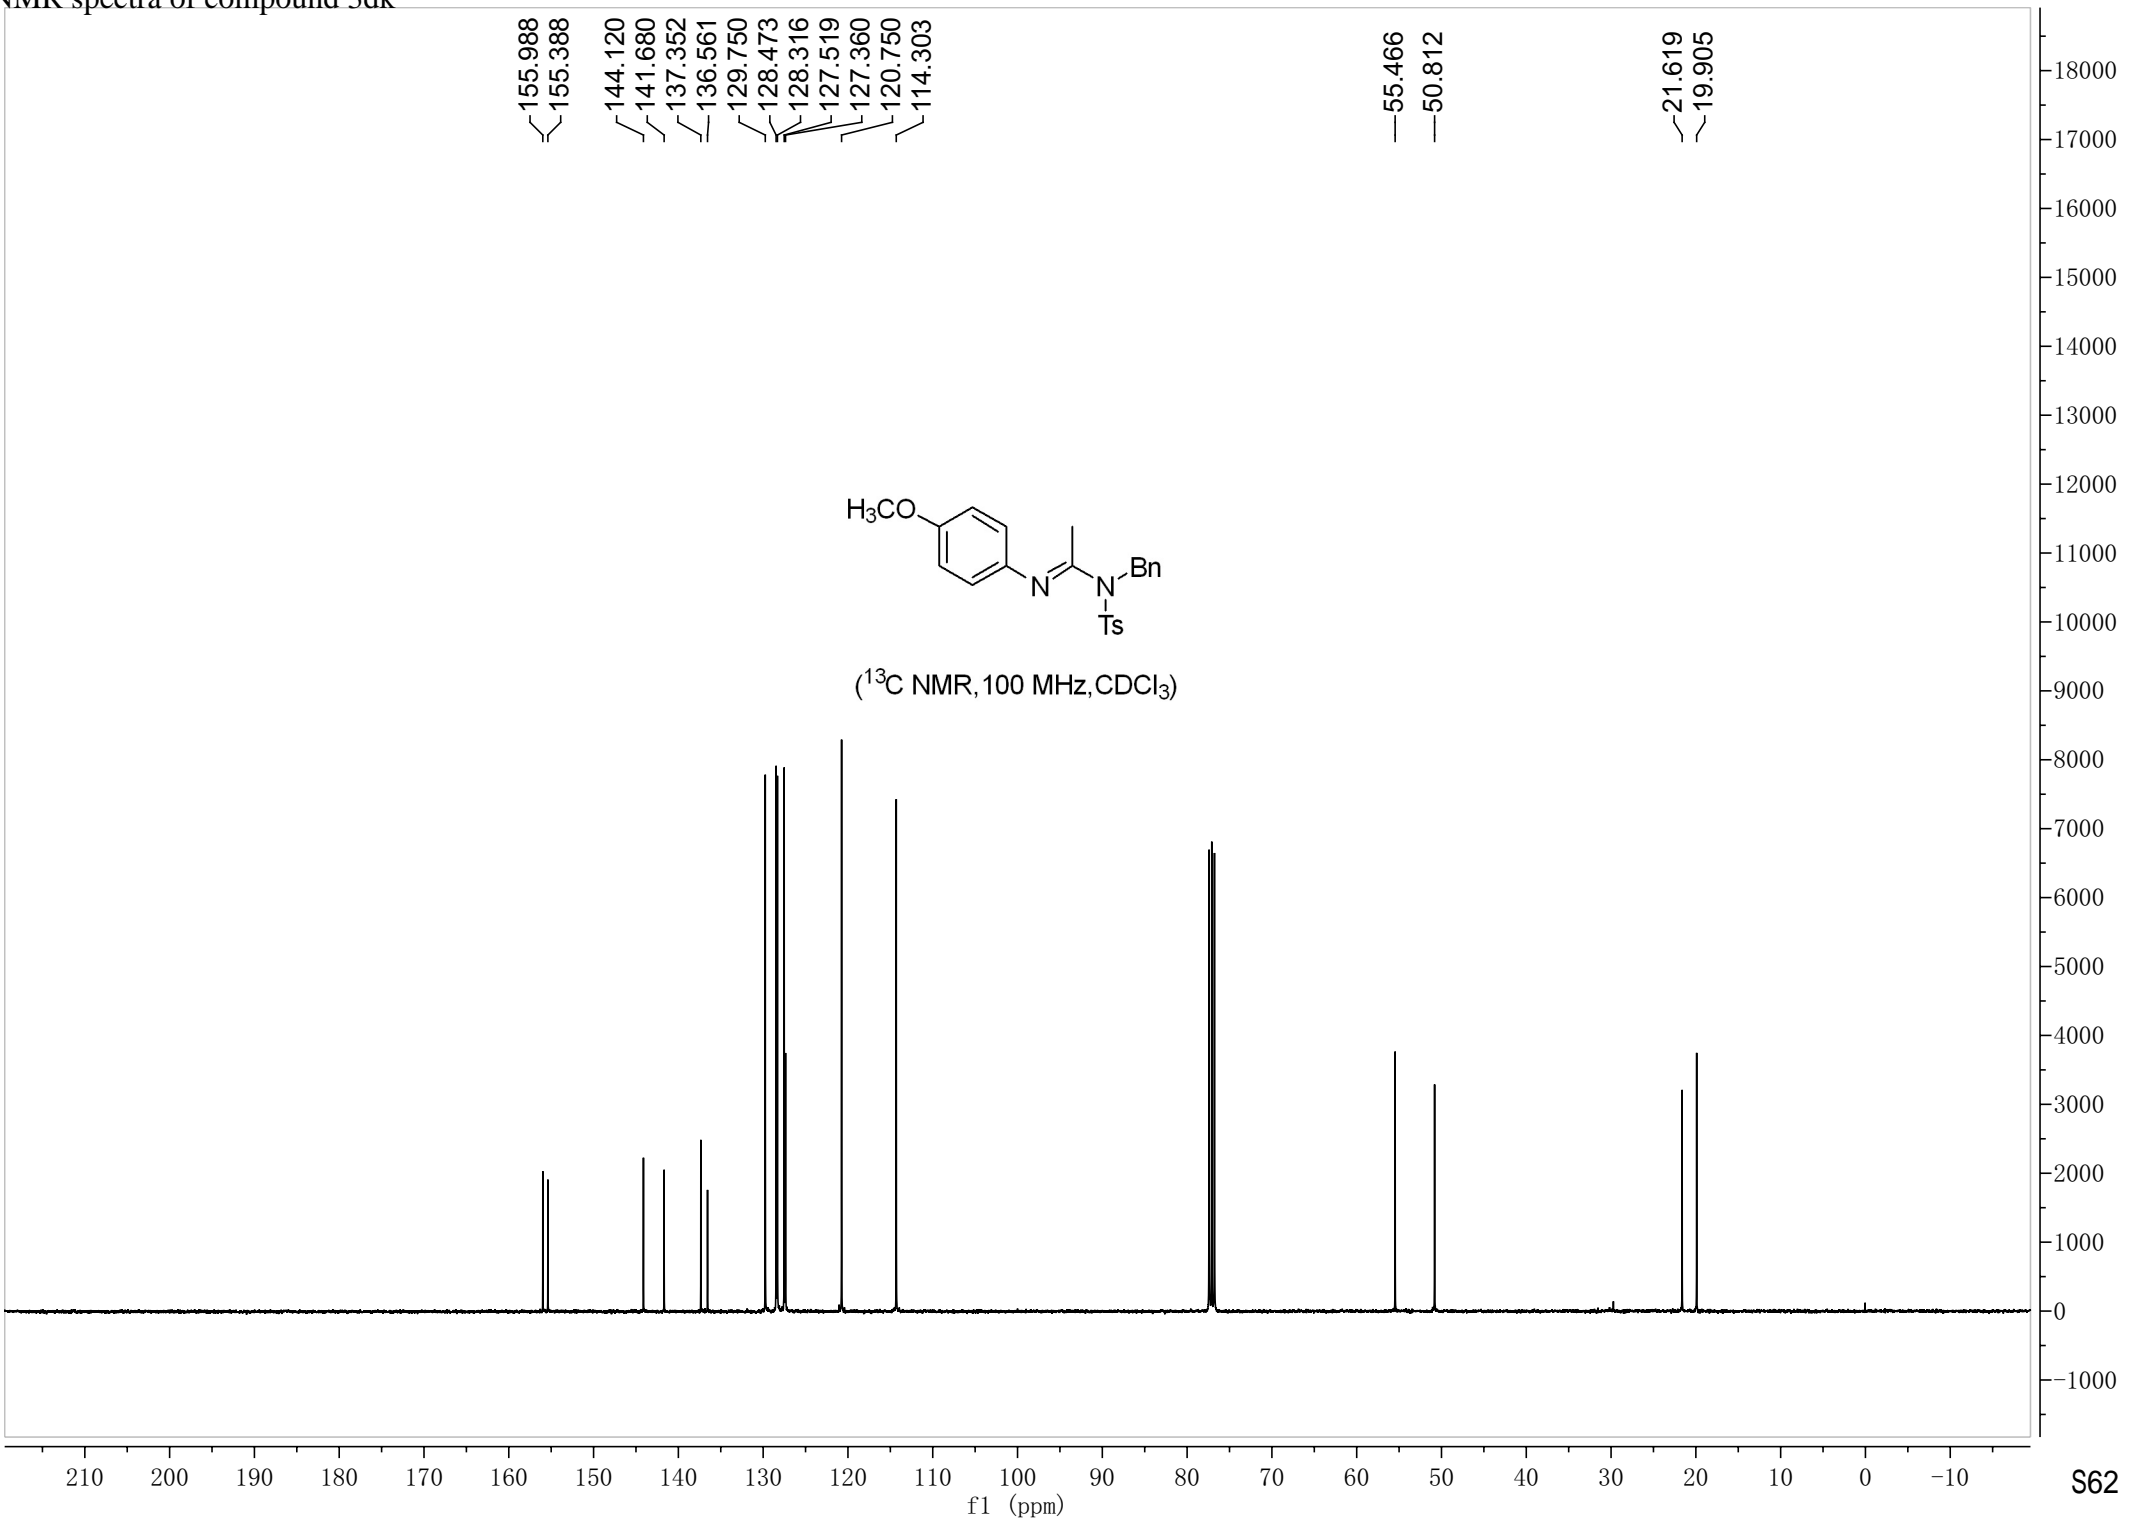

NMR spectra of compound 3ik

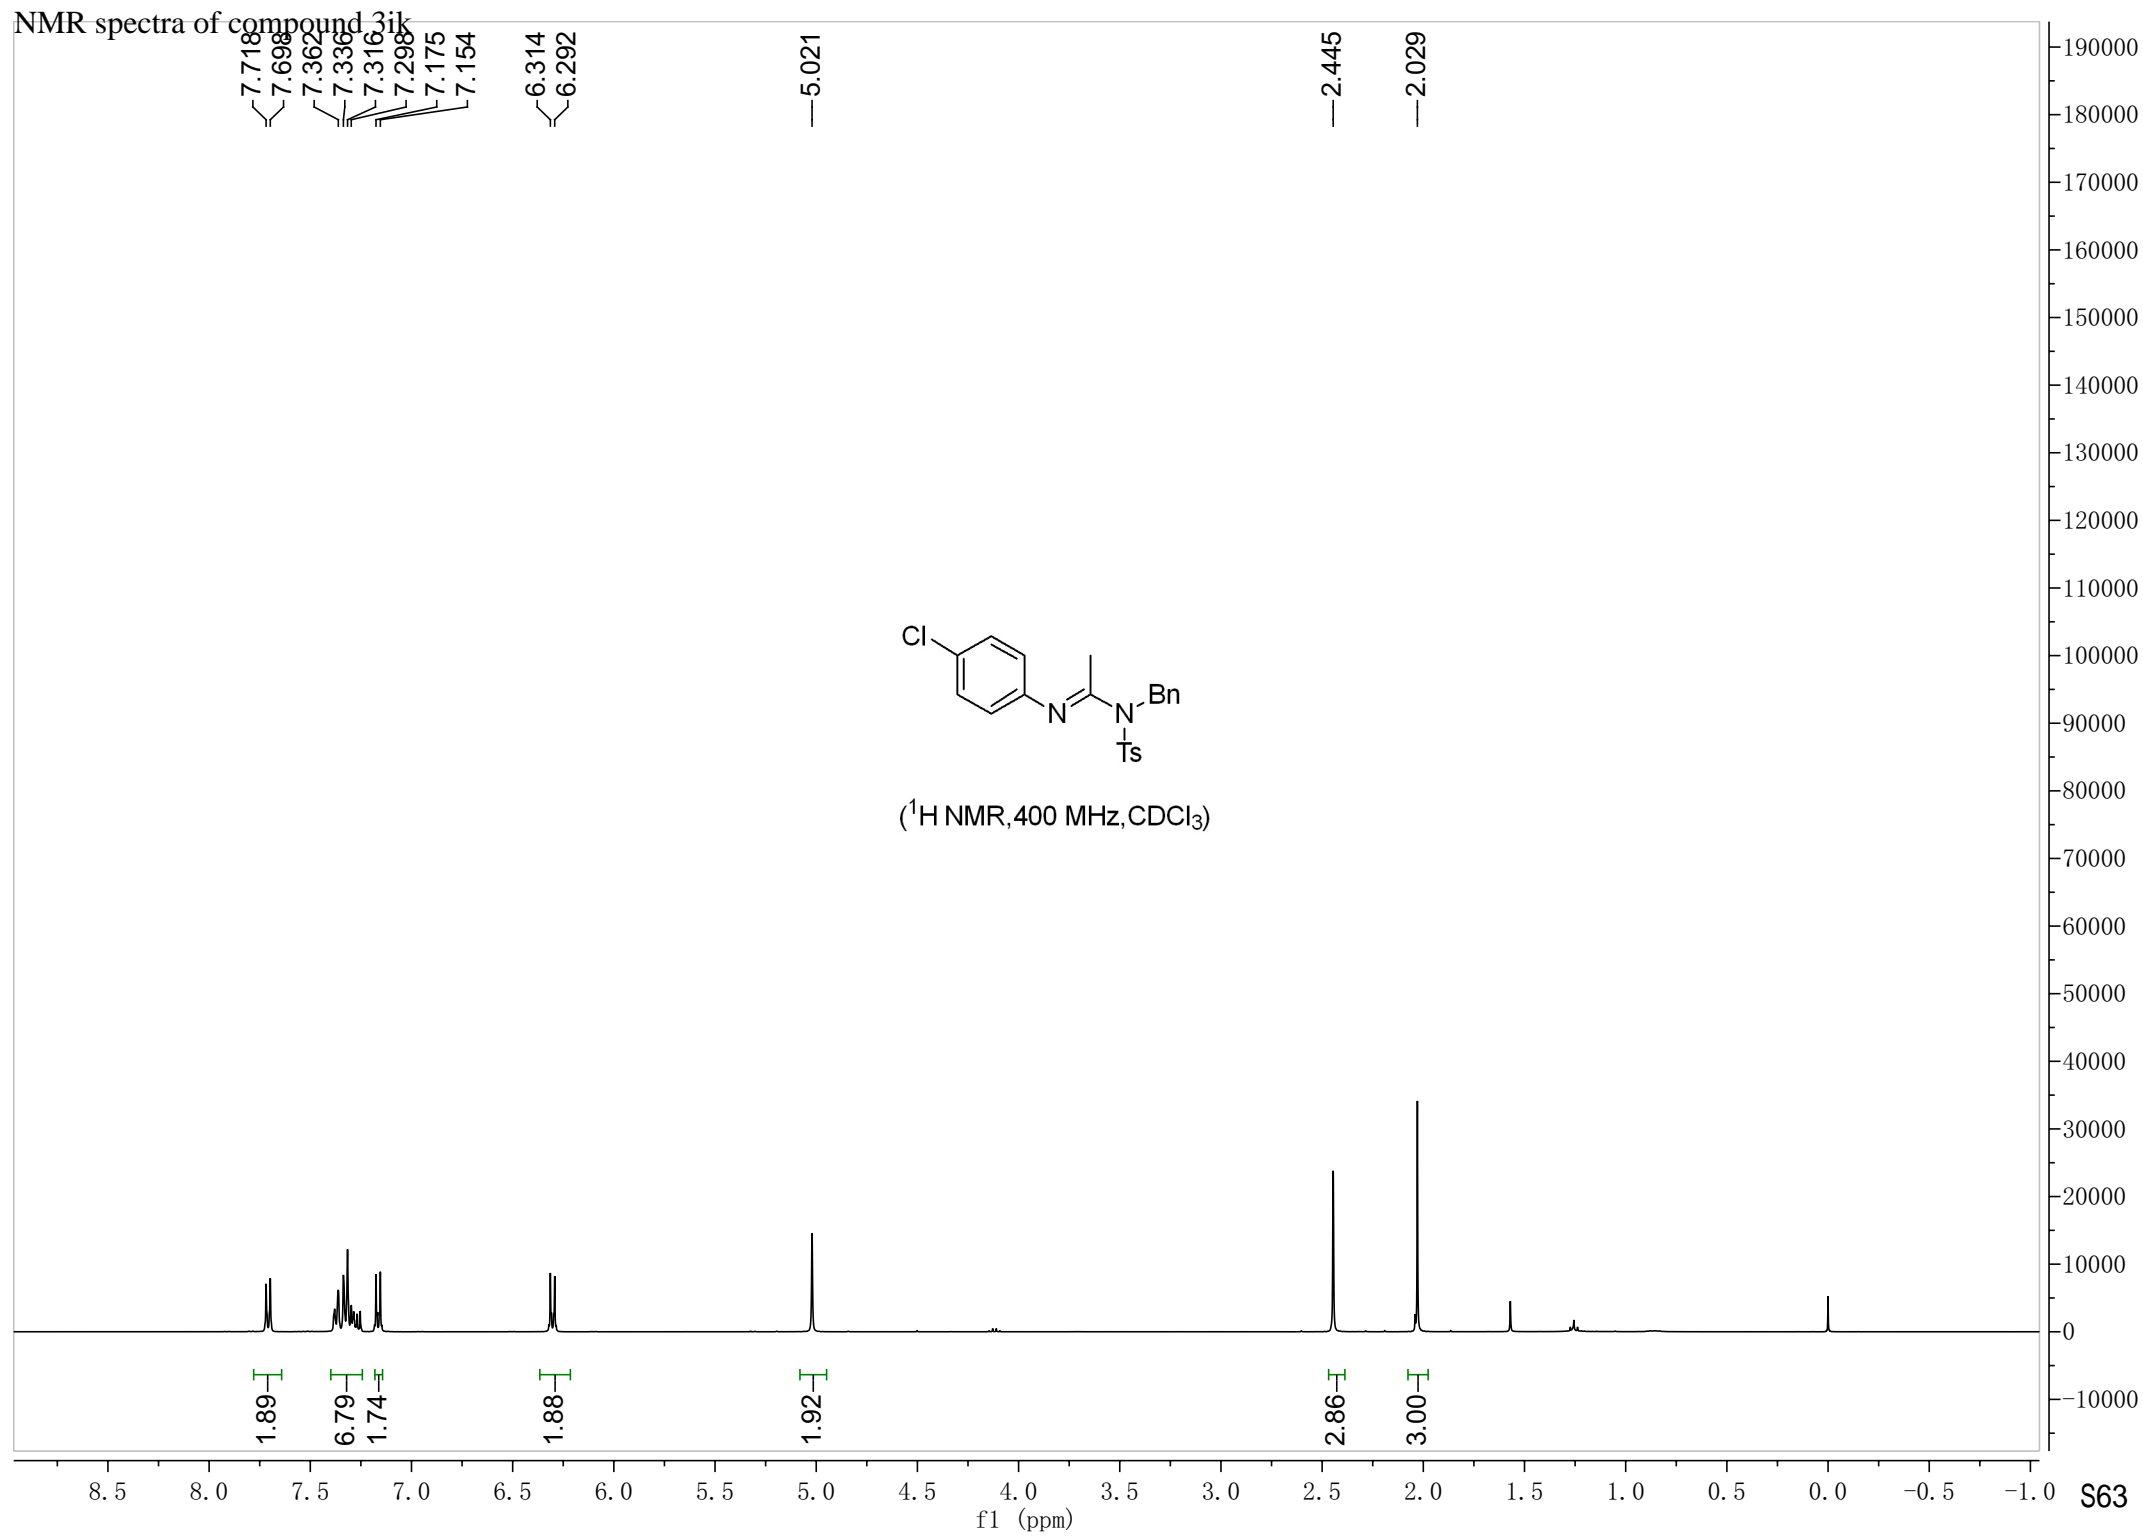

NMR spectra of compound 3ik

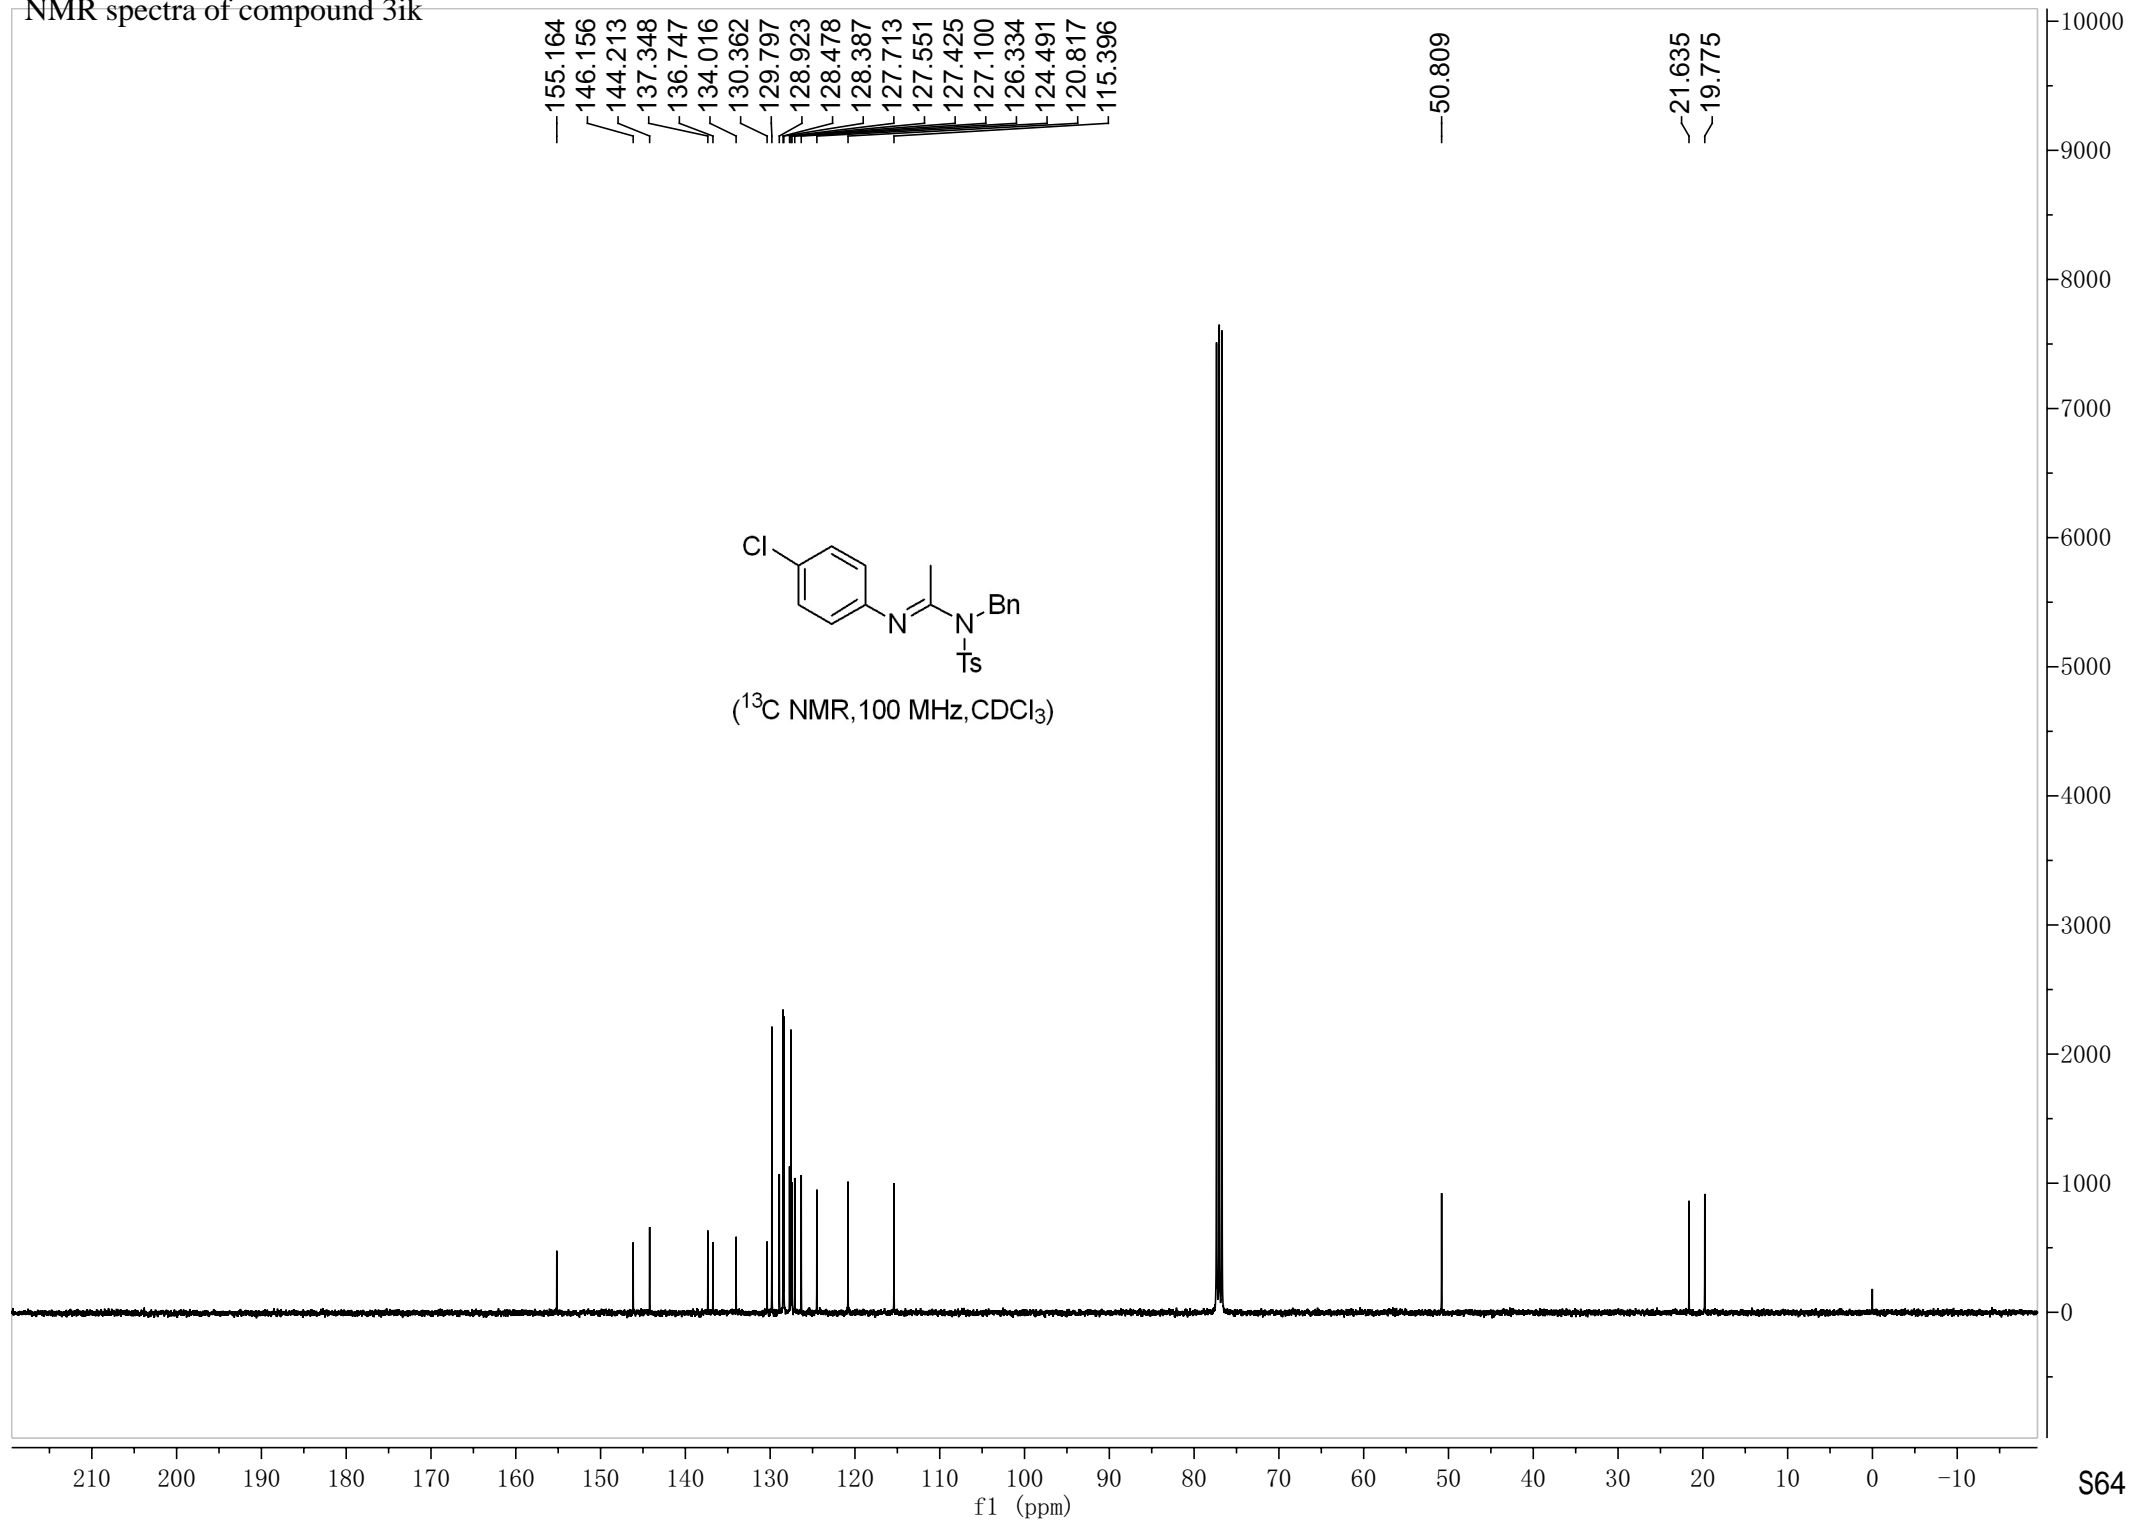

NMR spectra of compound 3pa

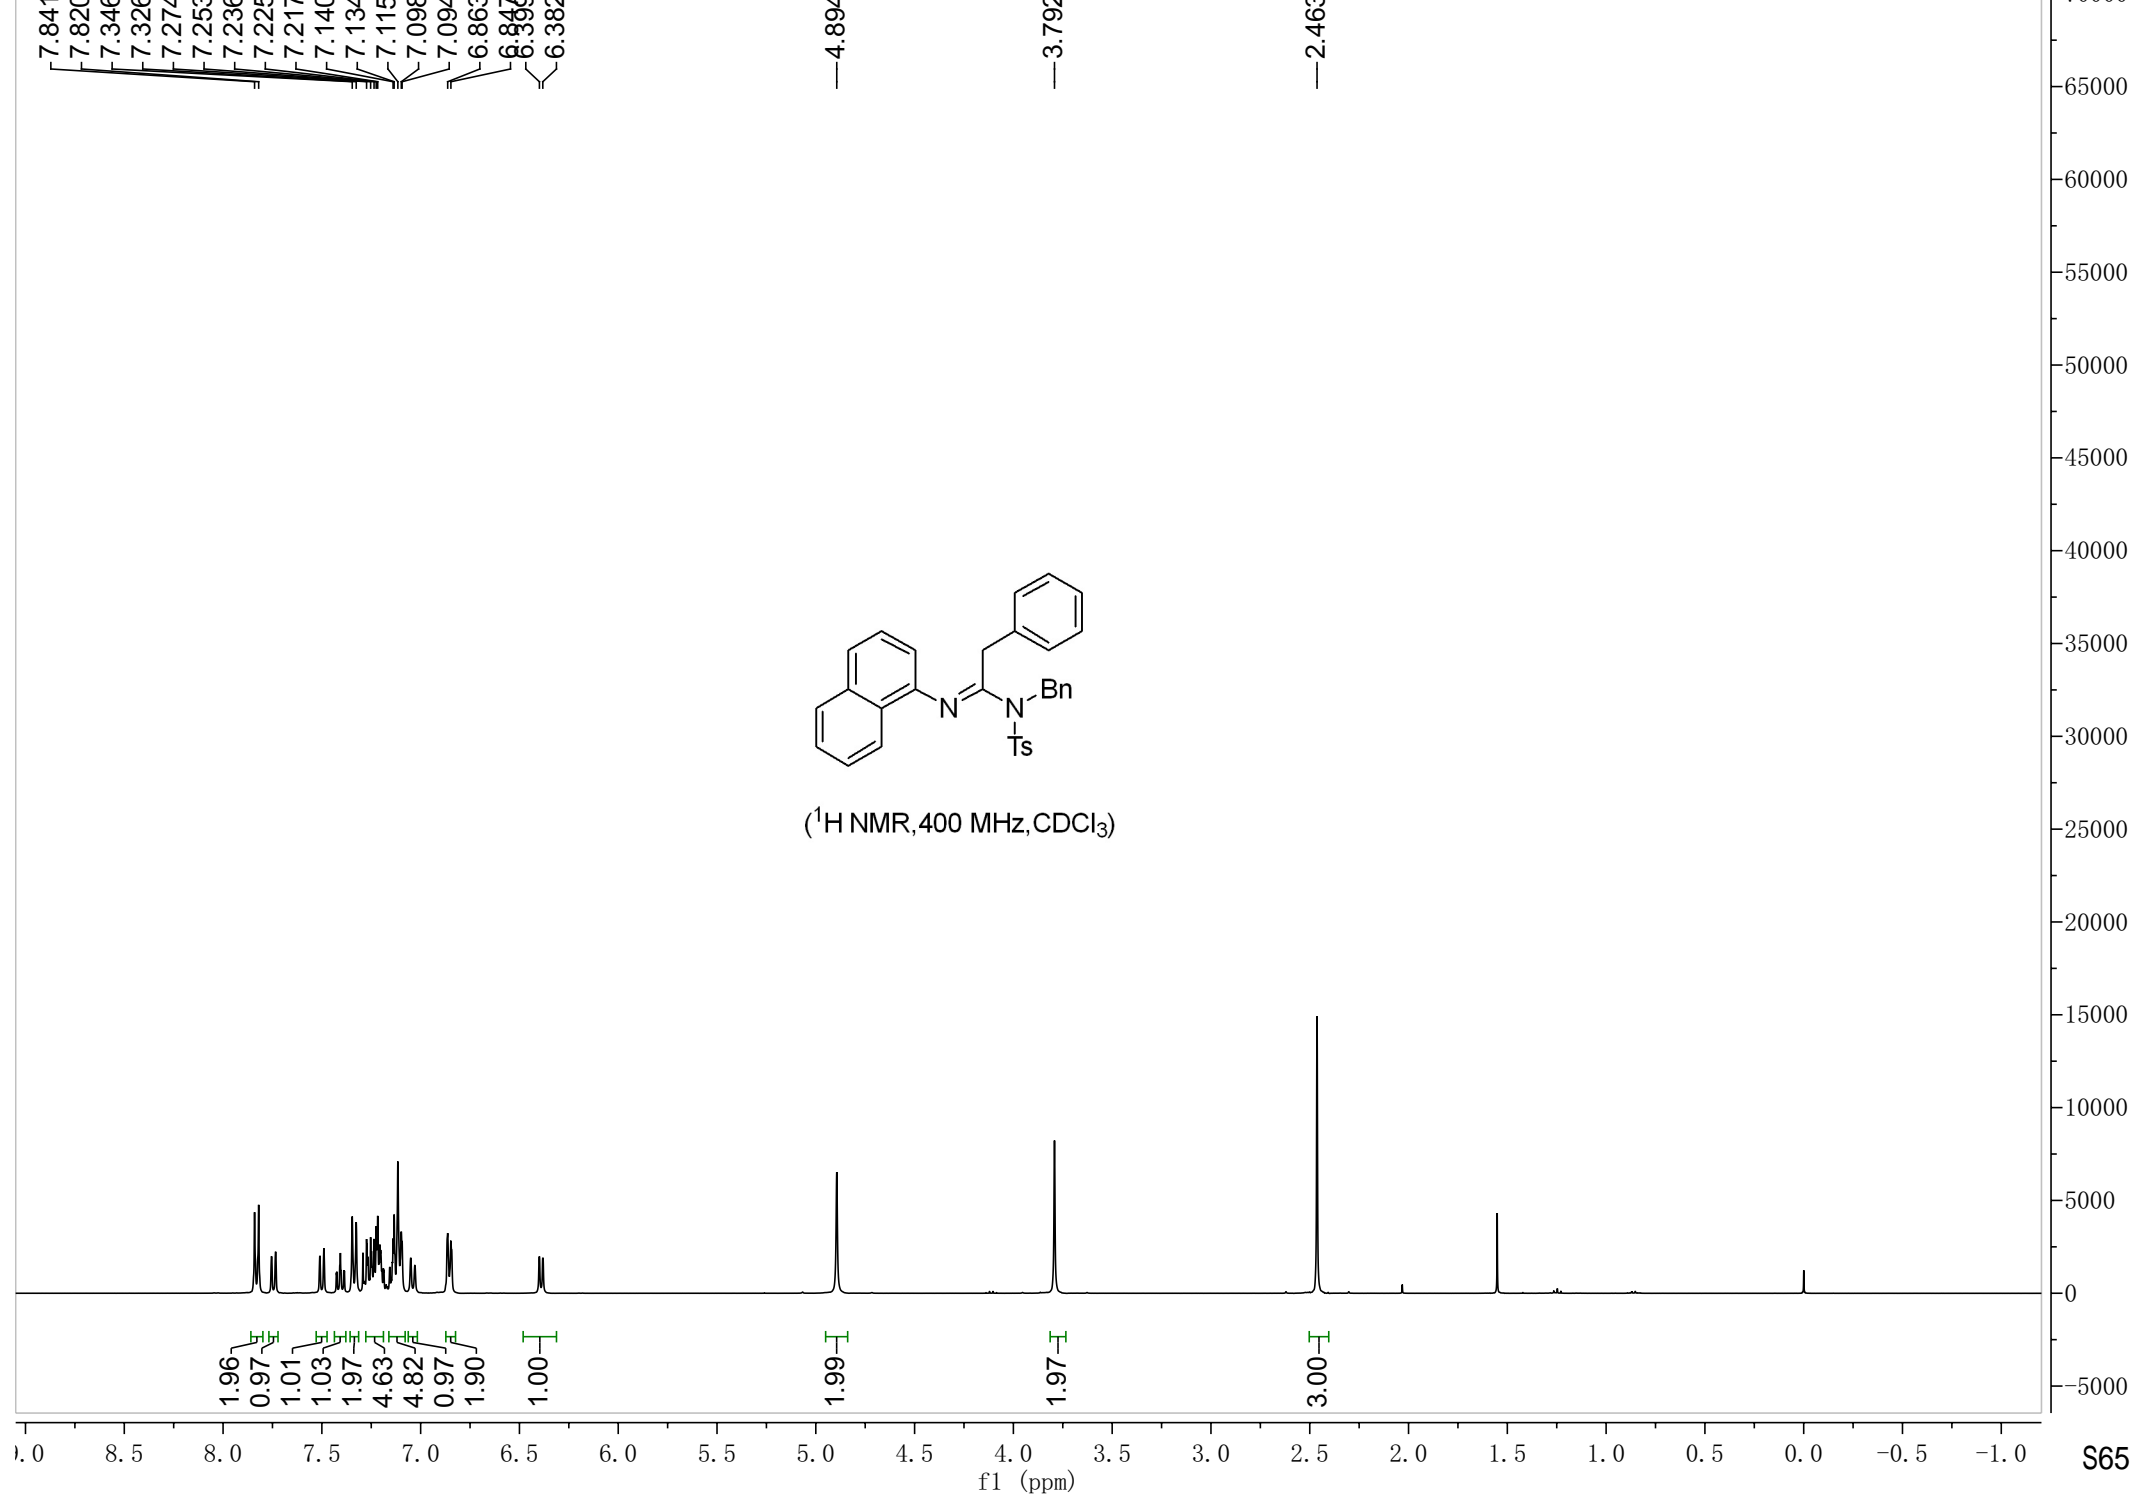

NMR spectra of compound 3pa

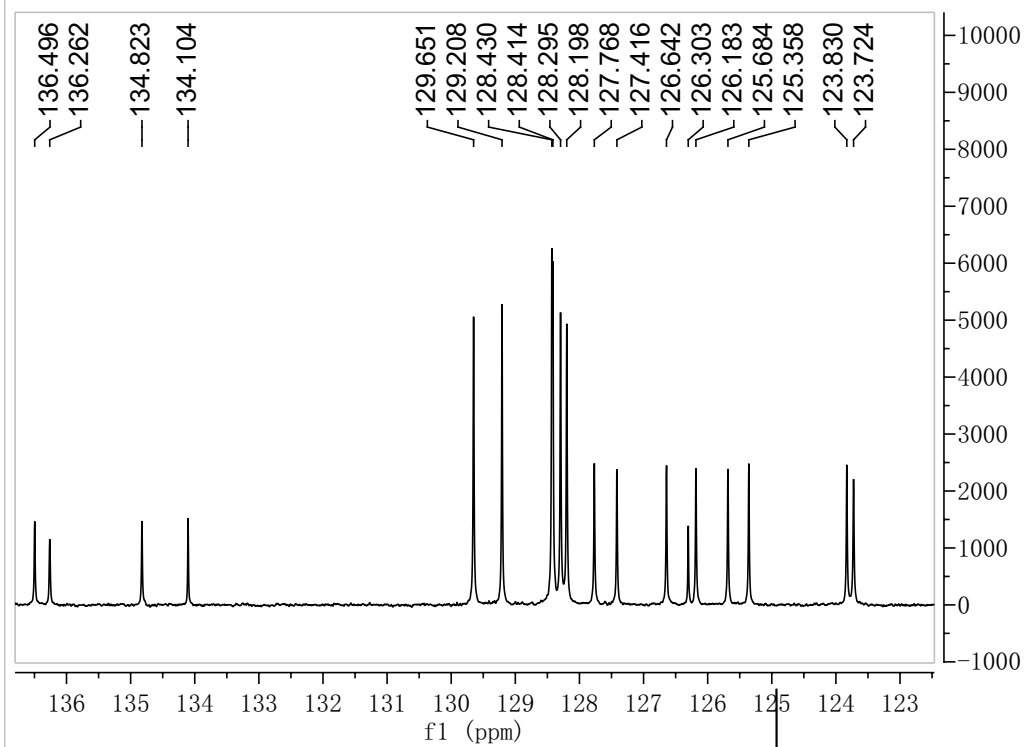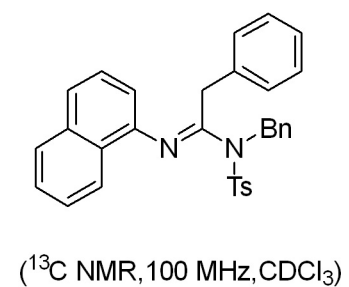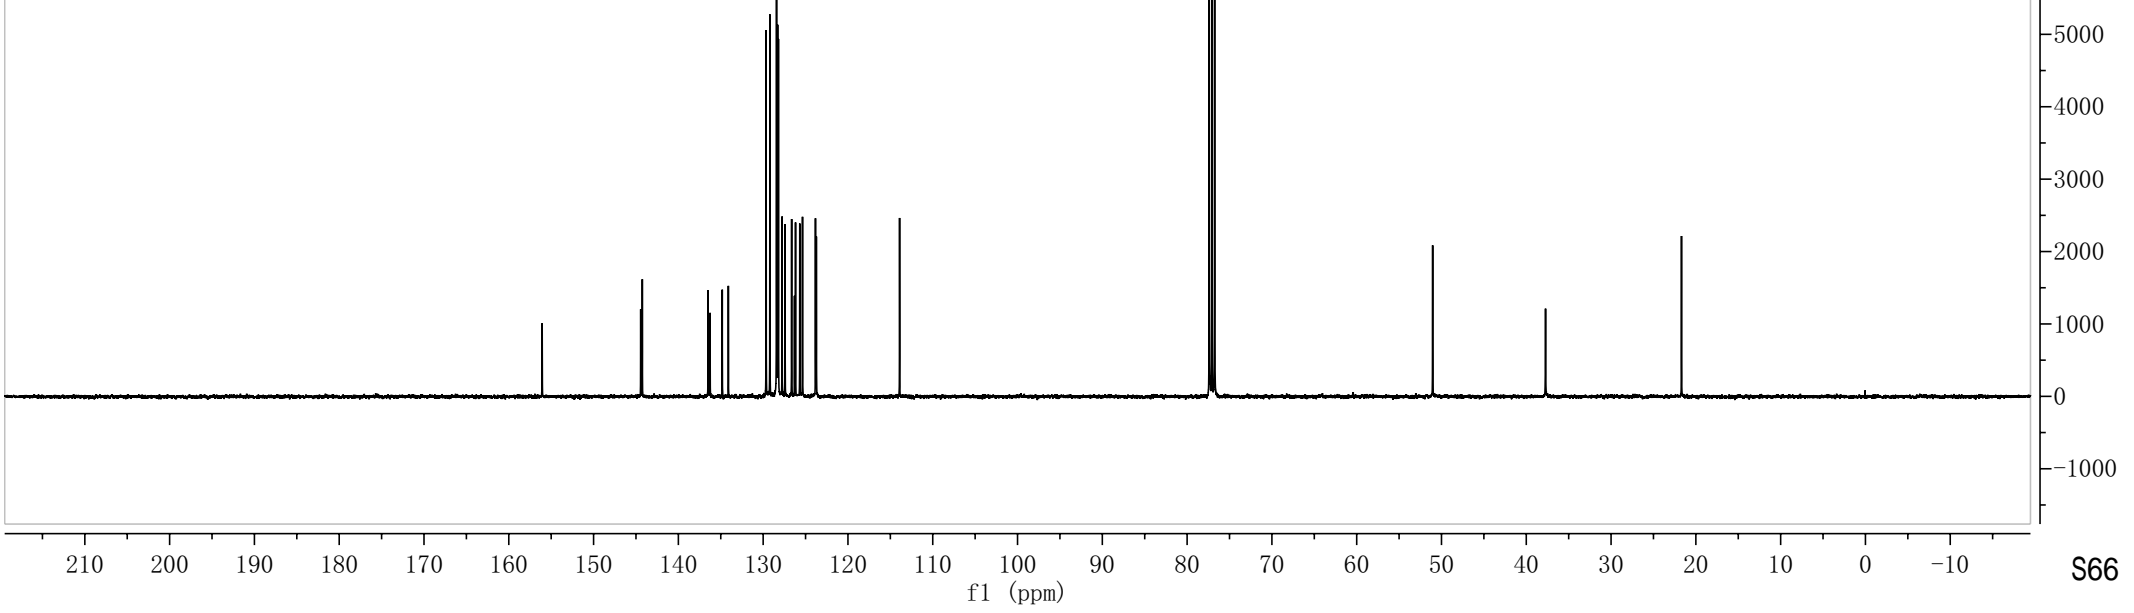

NMR spectra of compound 3pc

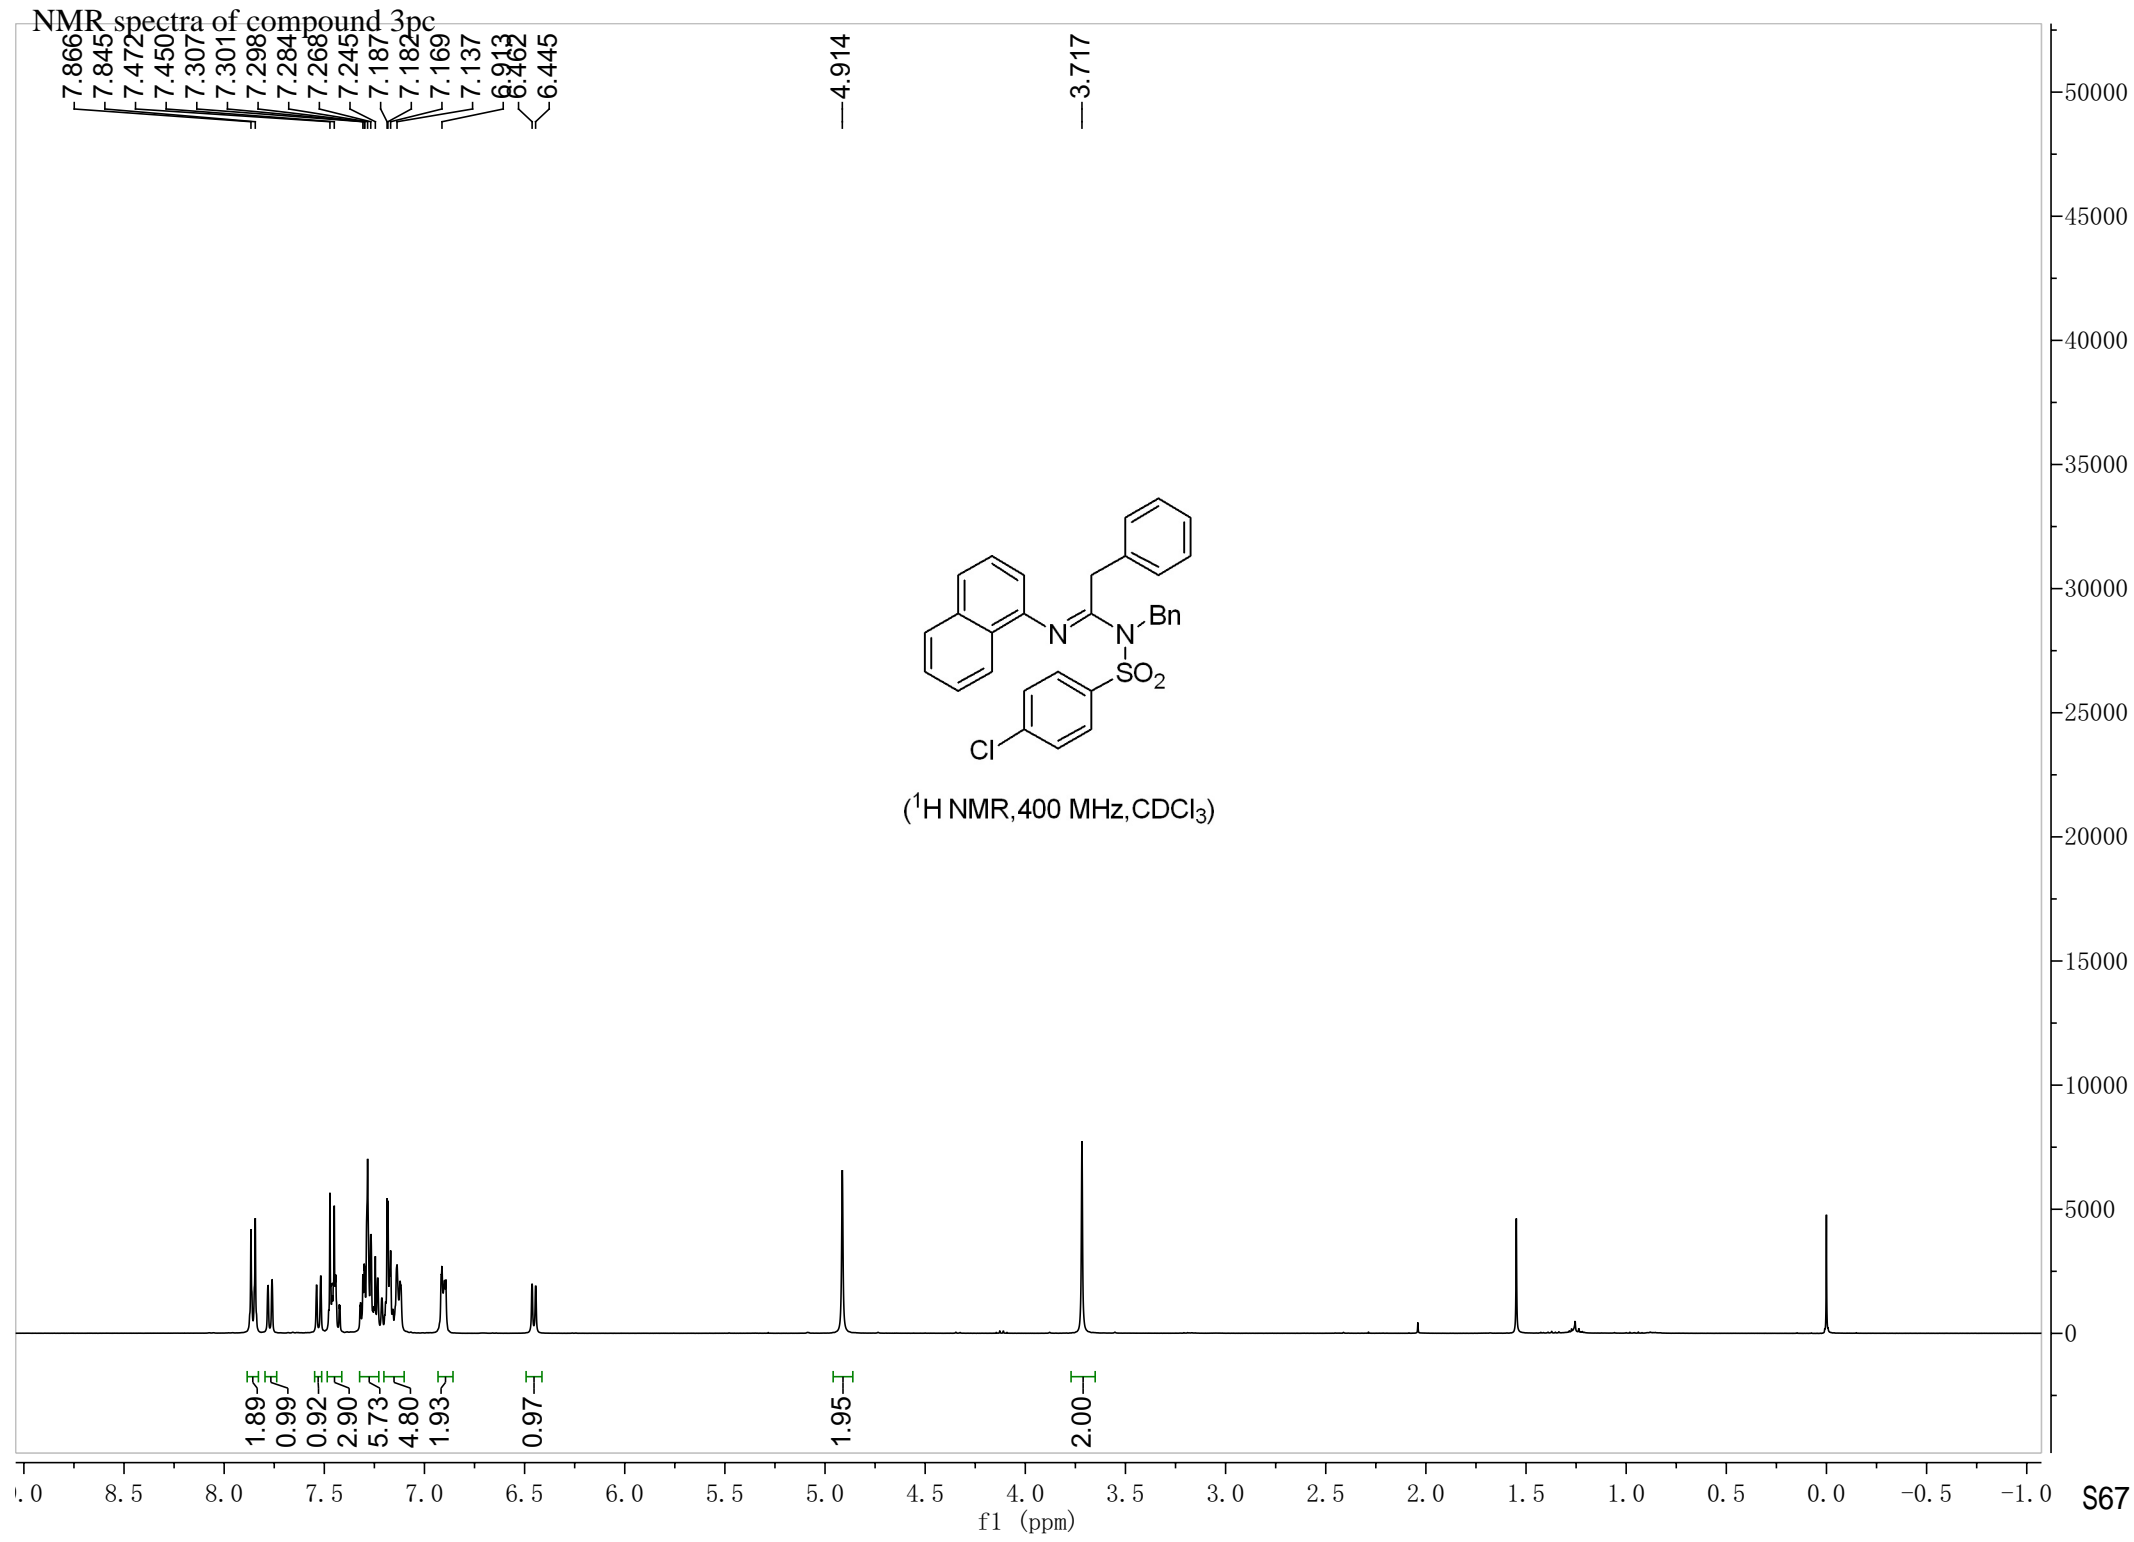

NMR spectra of compound 3pc

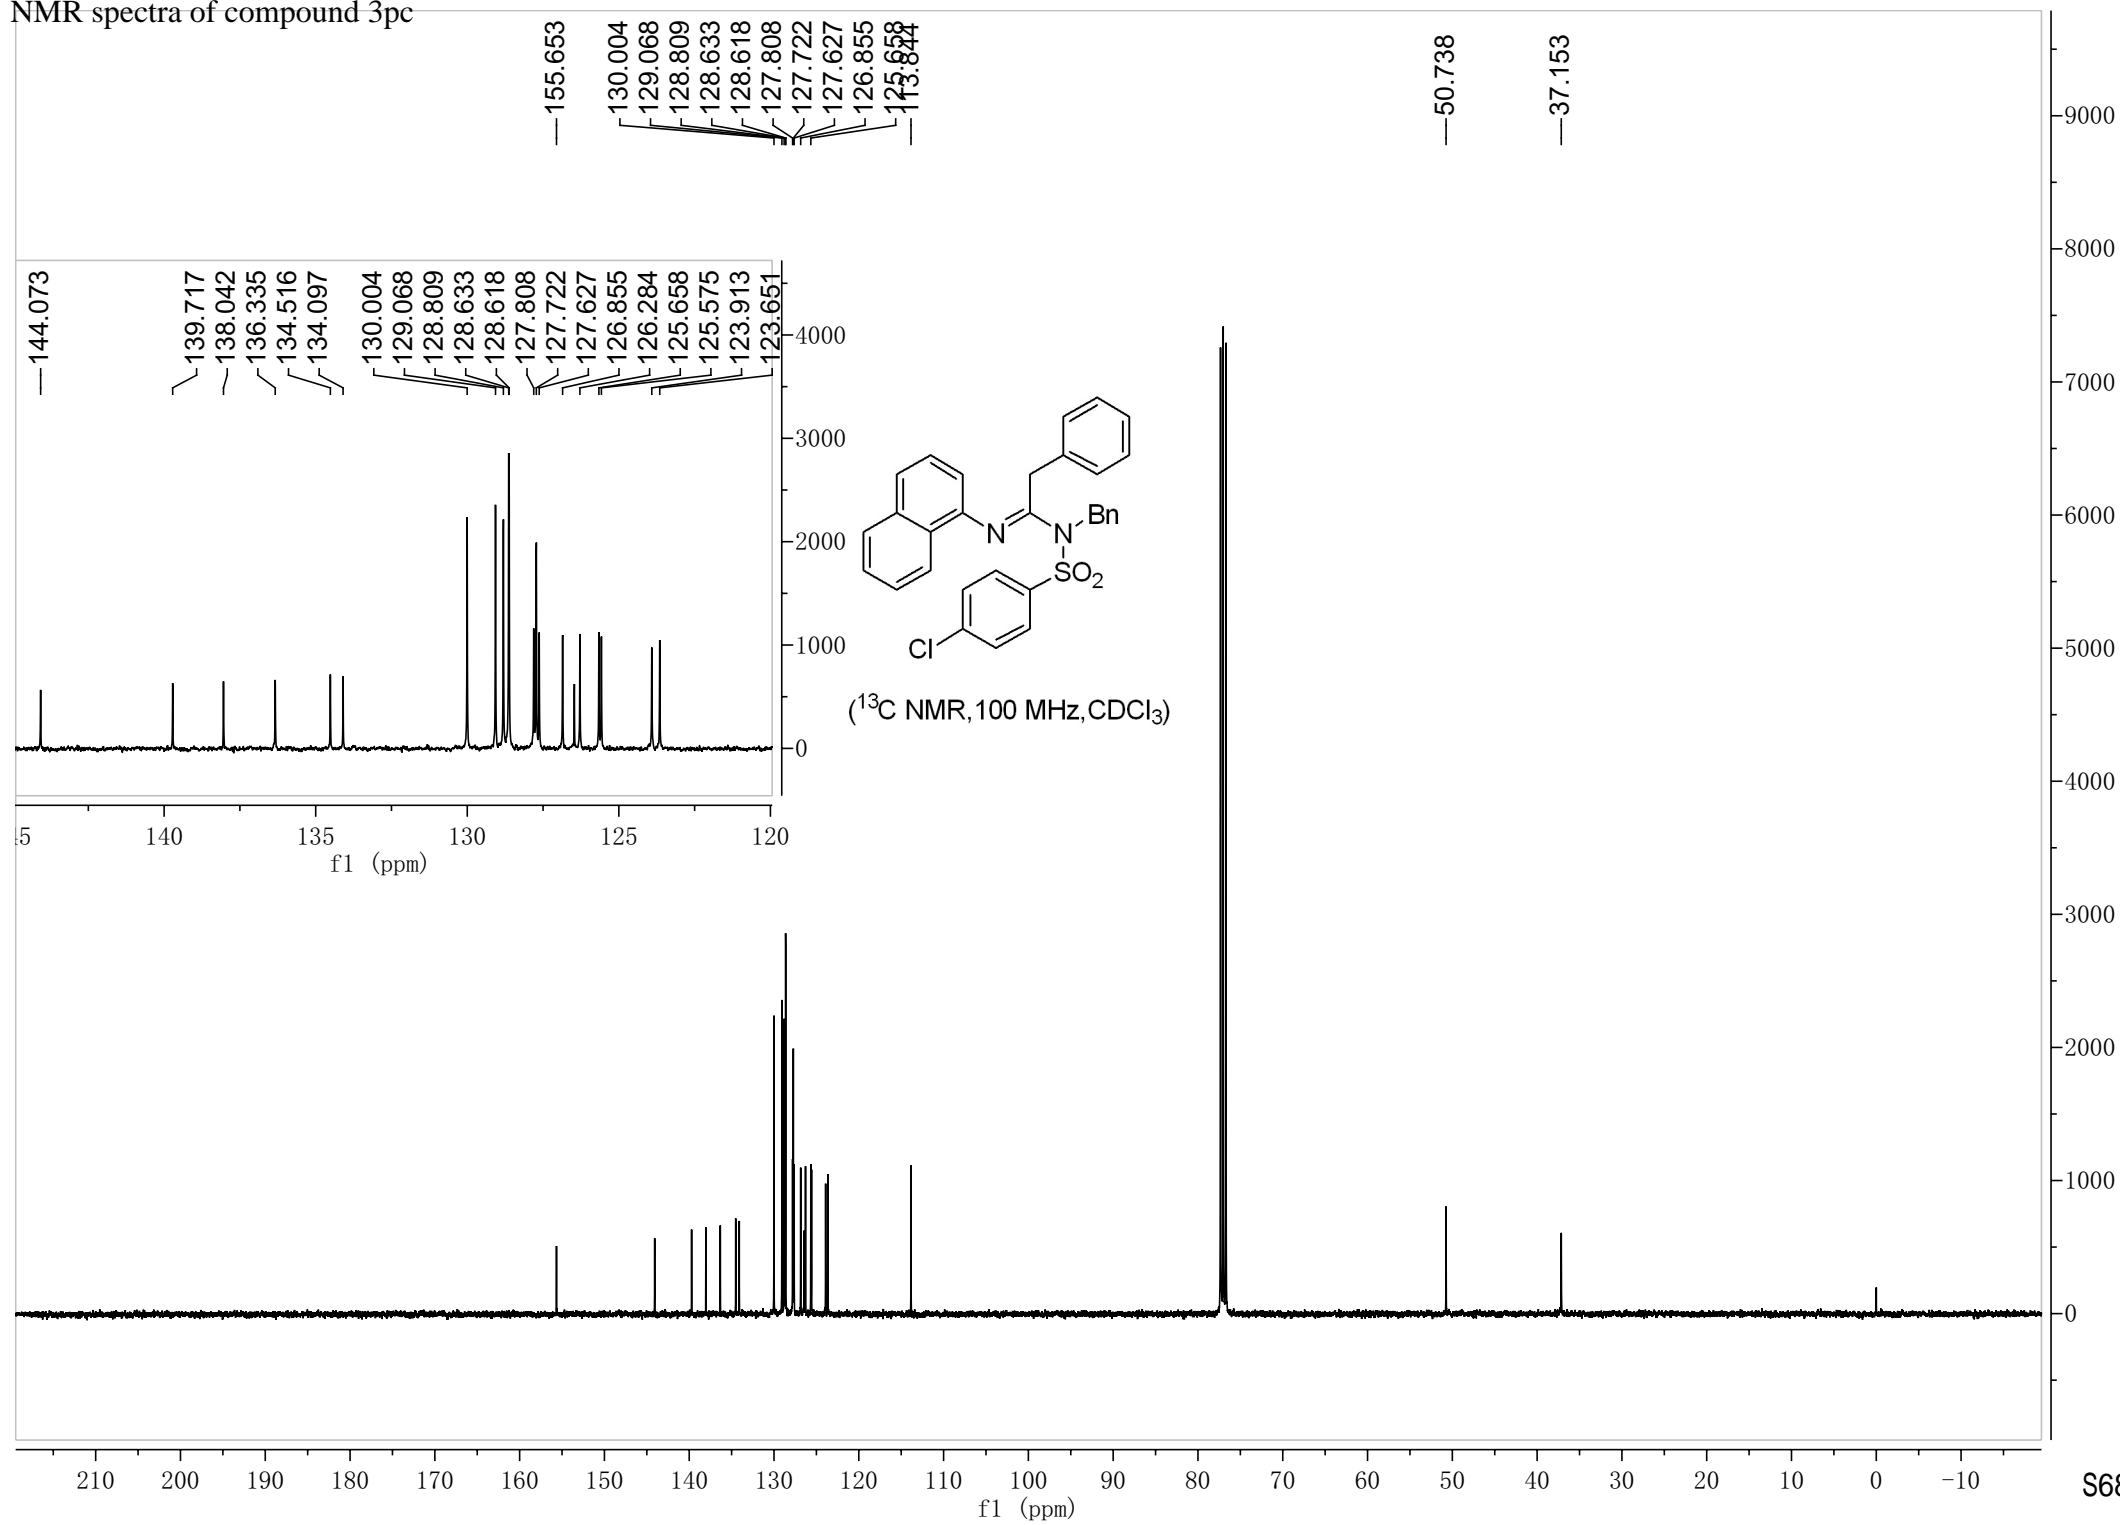



NMR spectra of compound 3pk

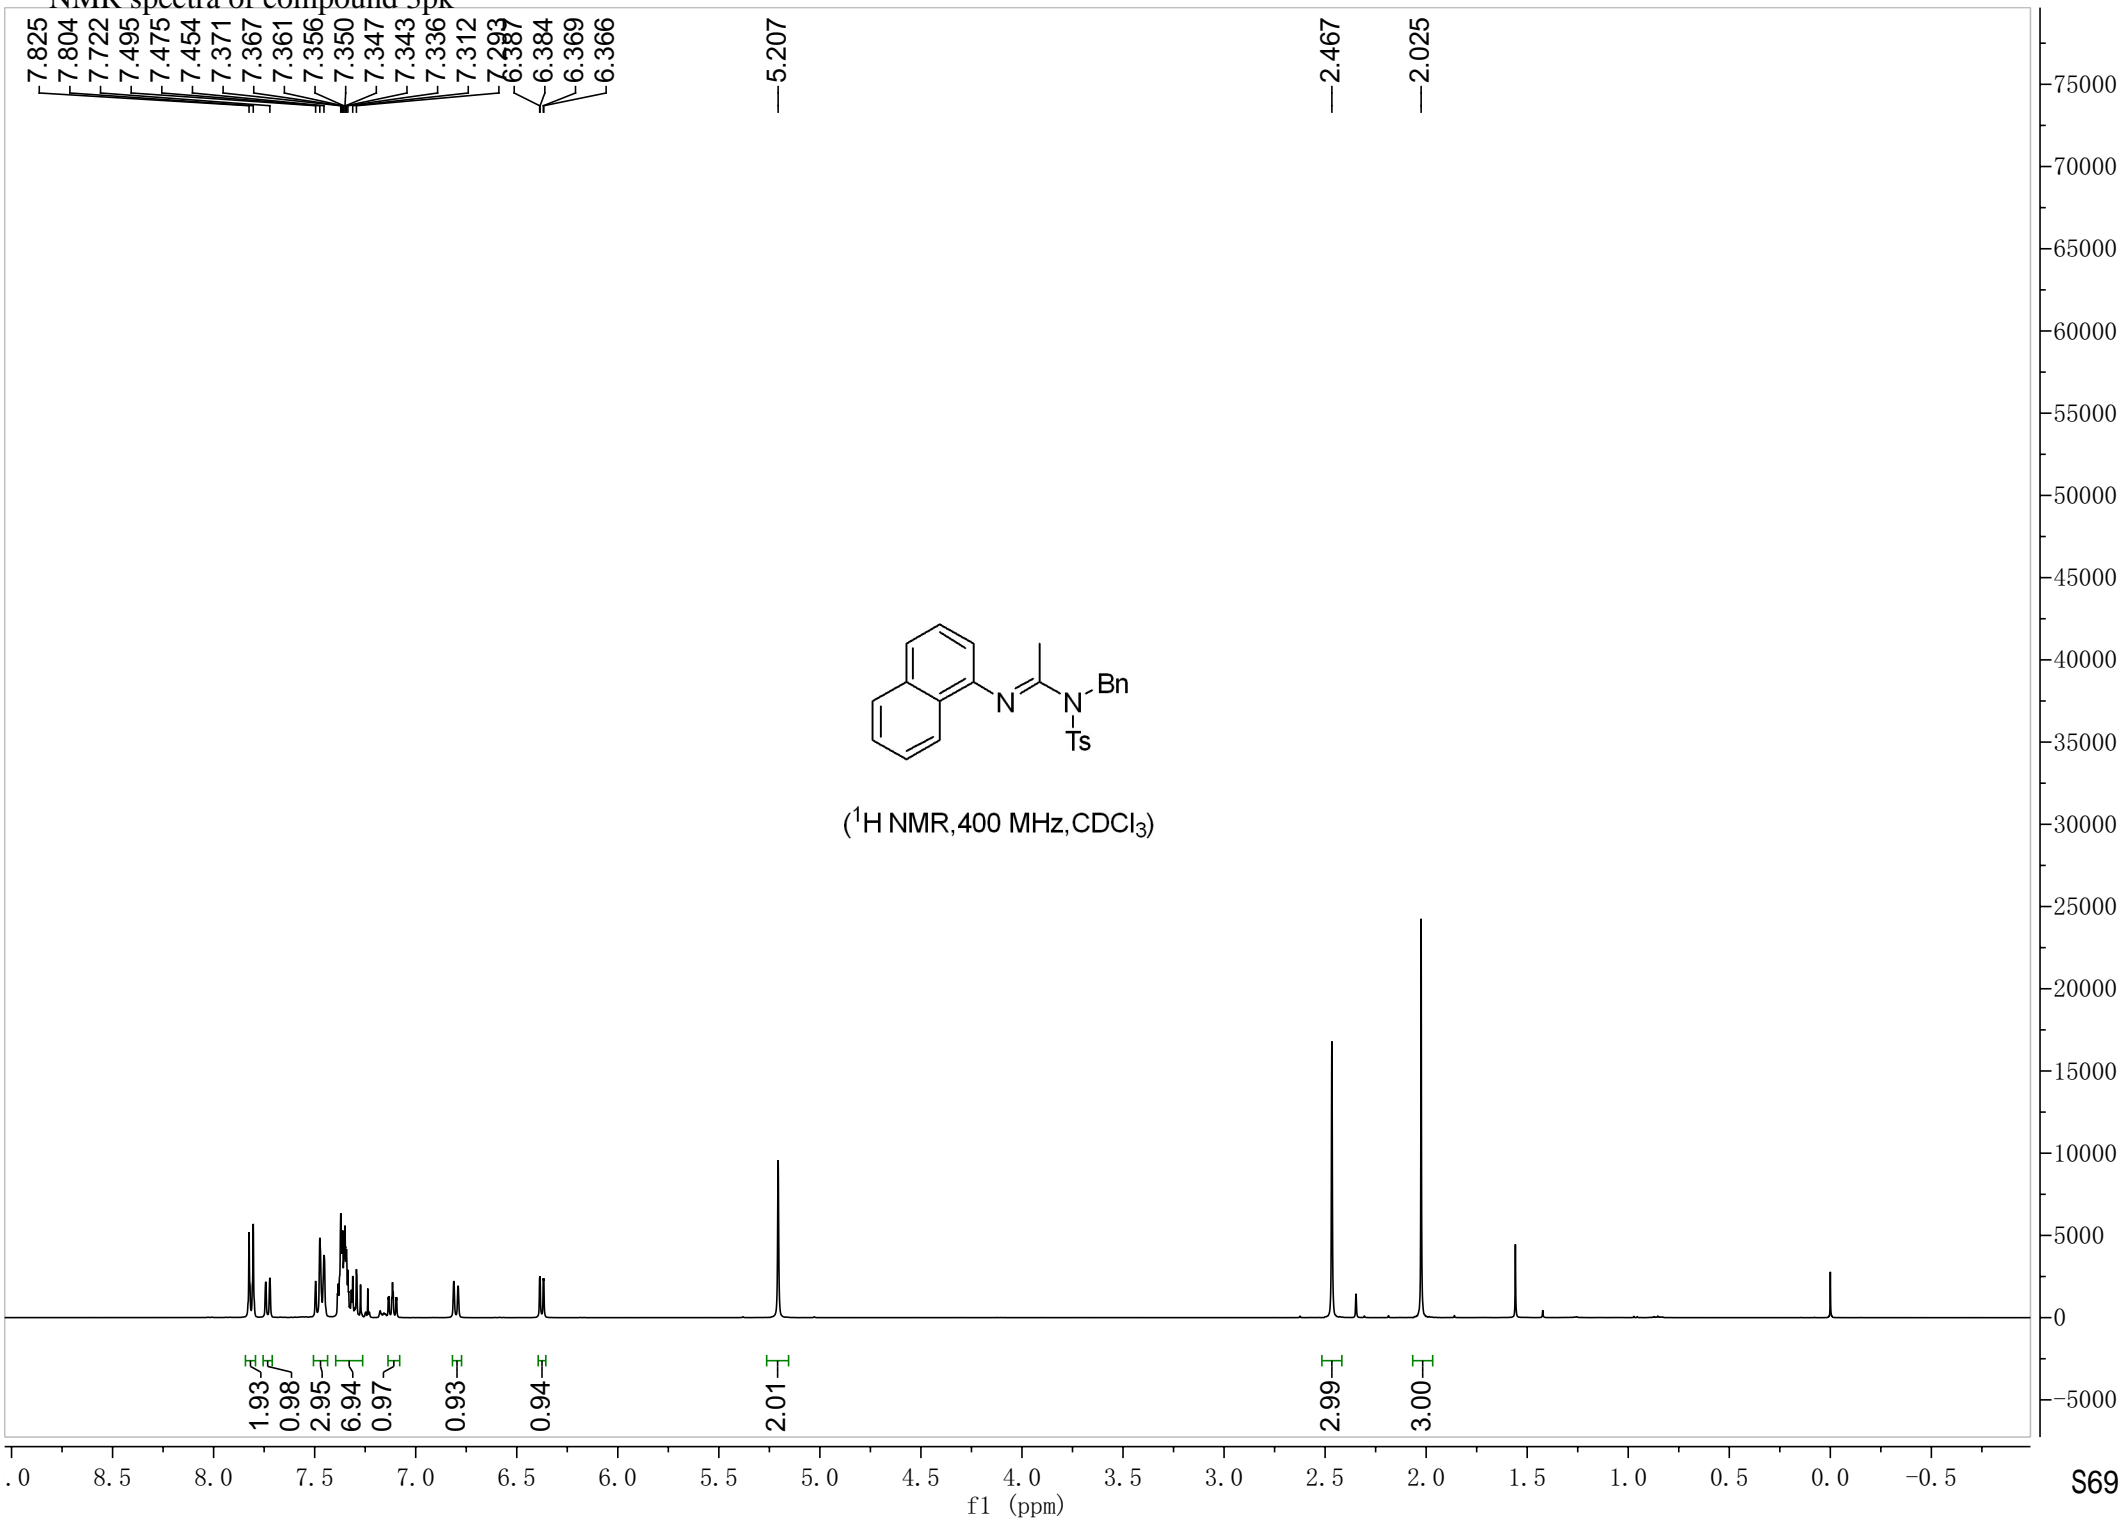

NMR spectra of compound 3pk

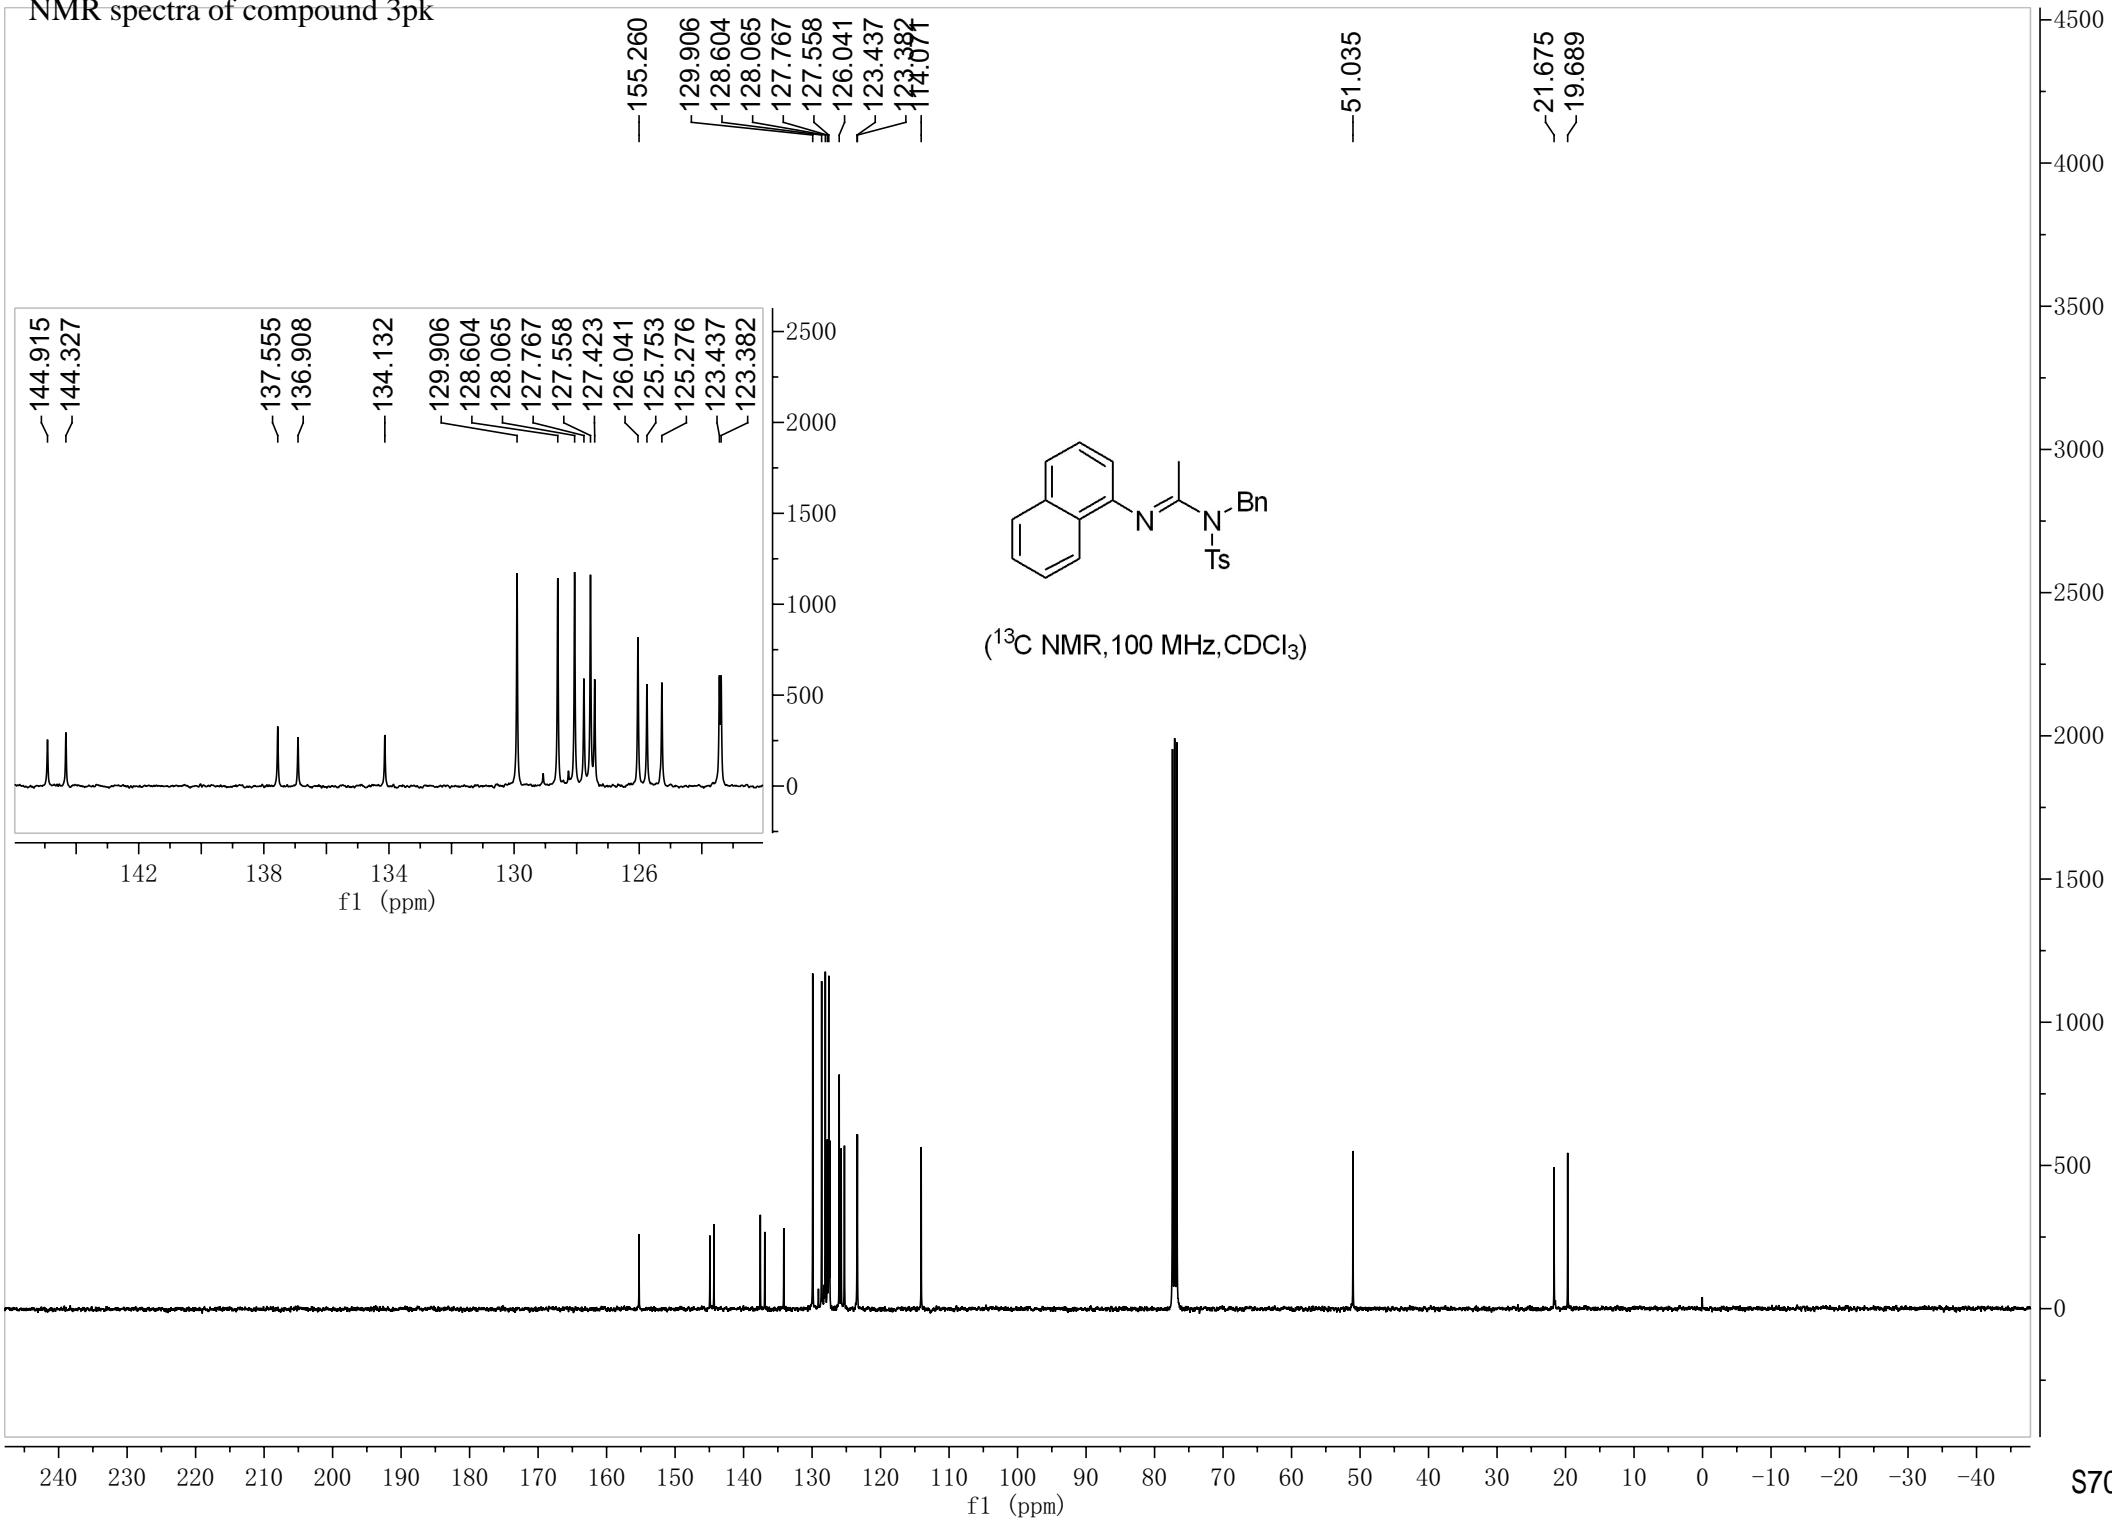

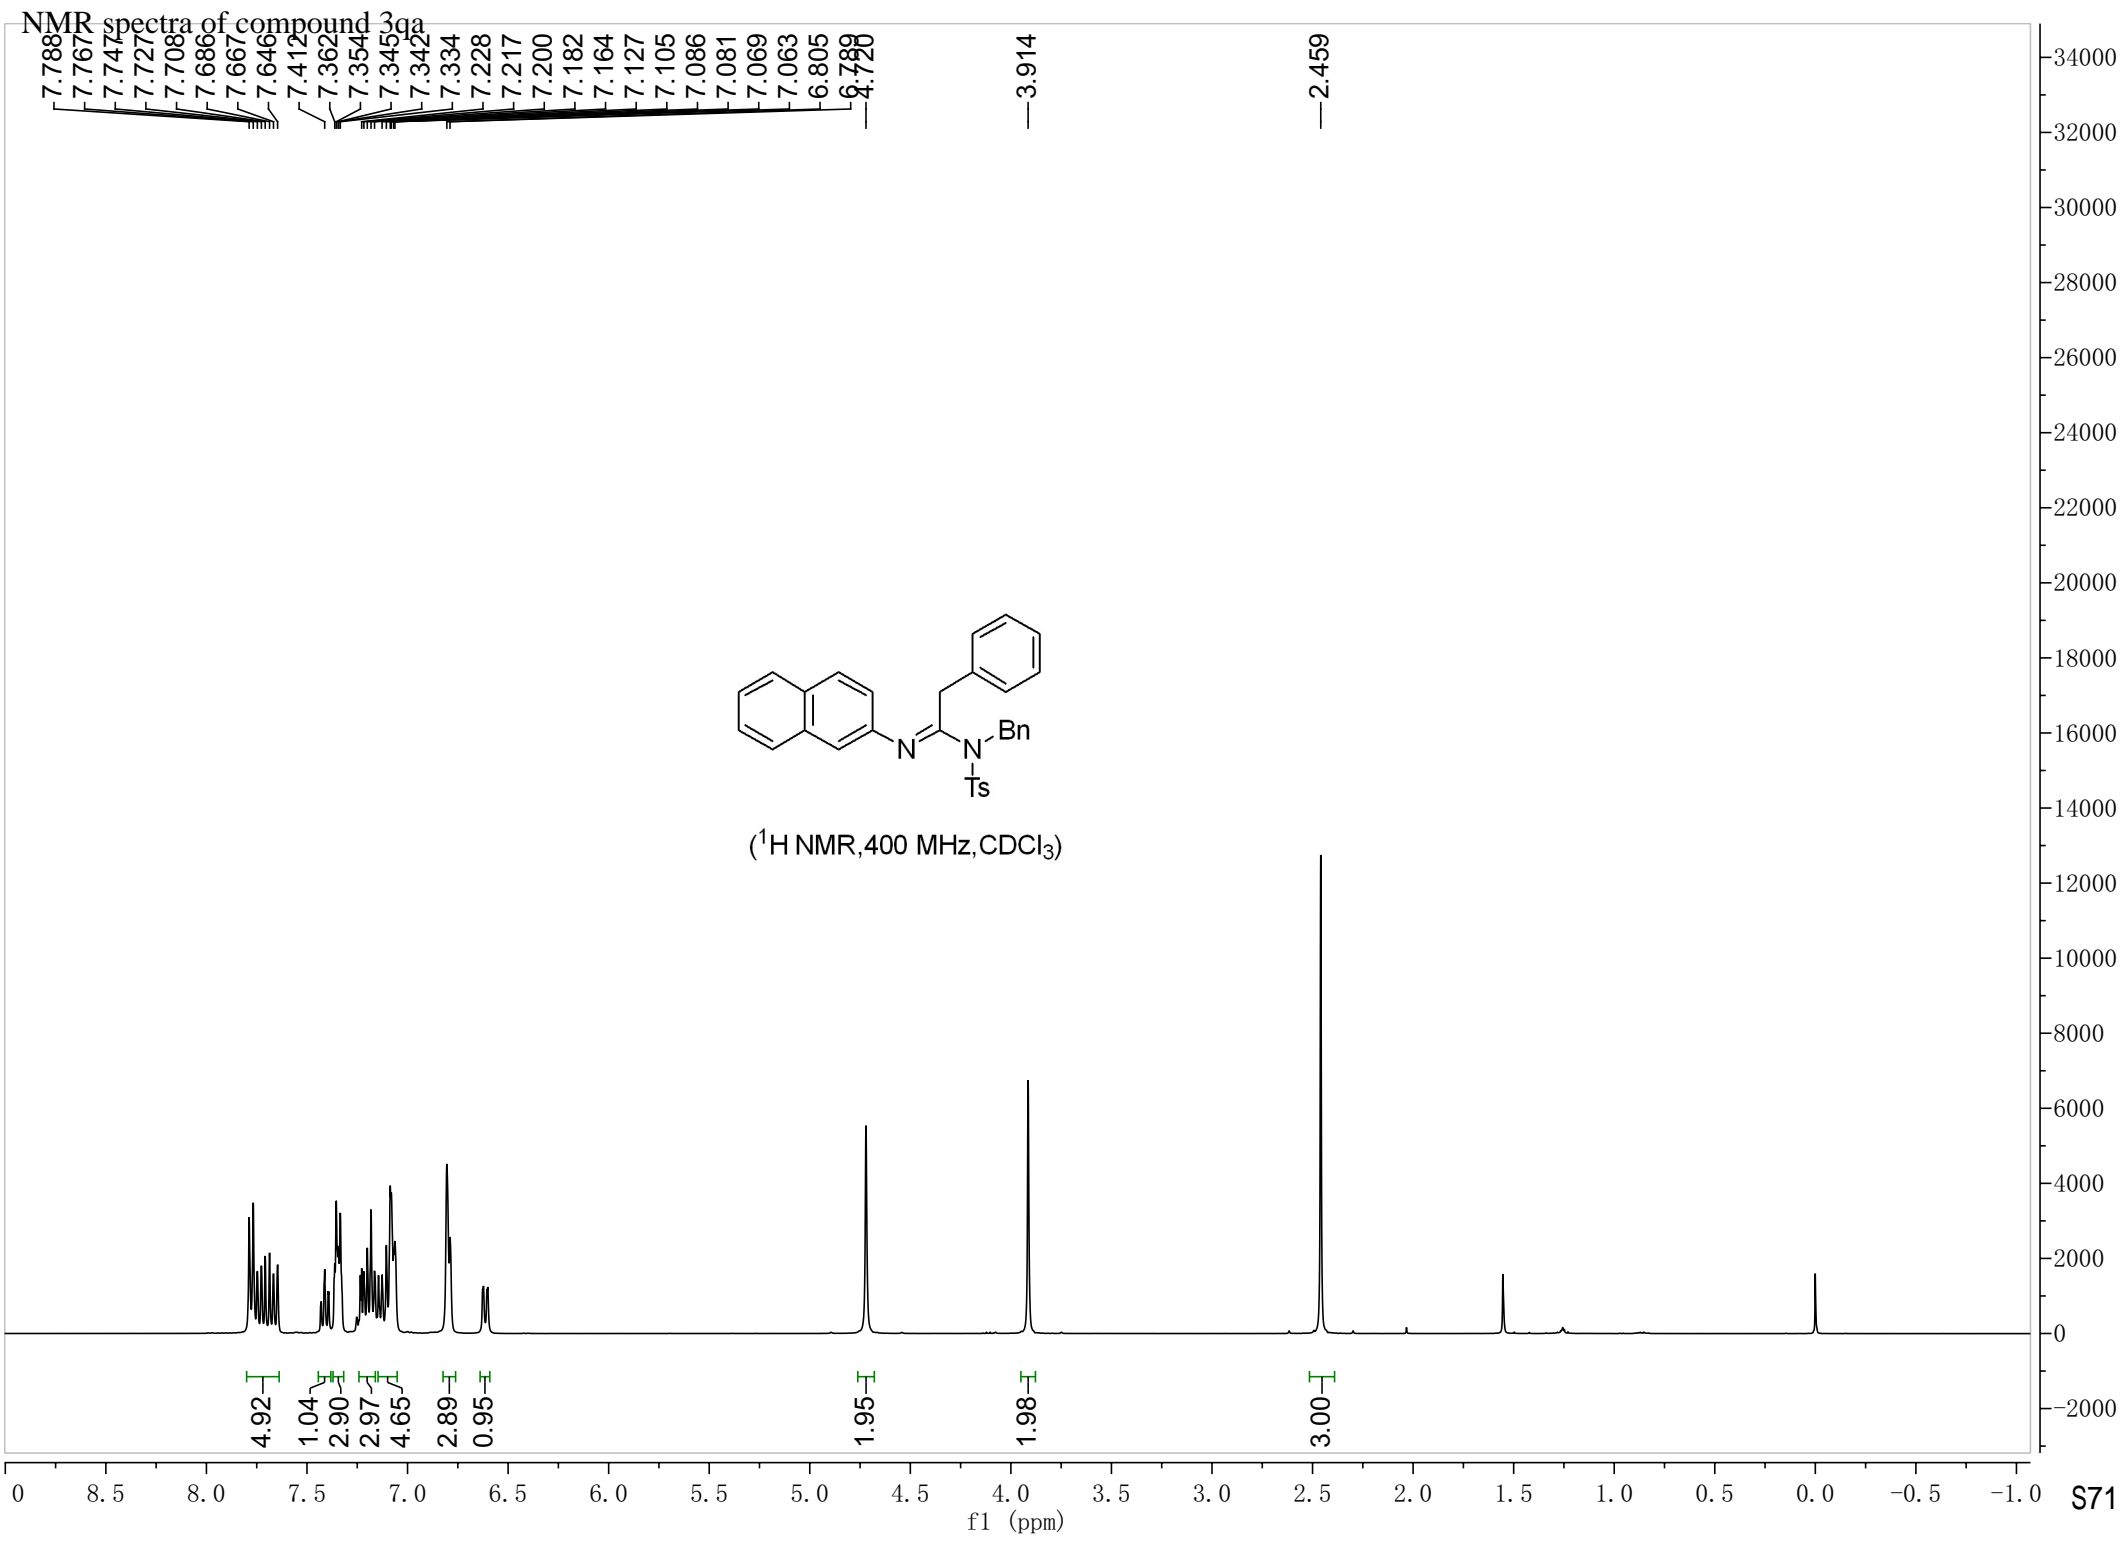

NMR spectra of compound 3qa

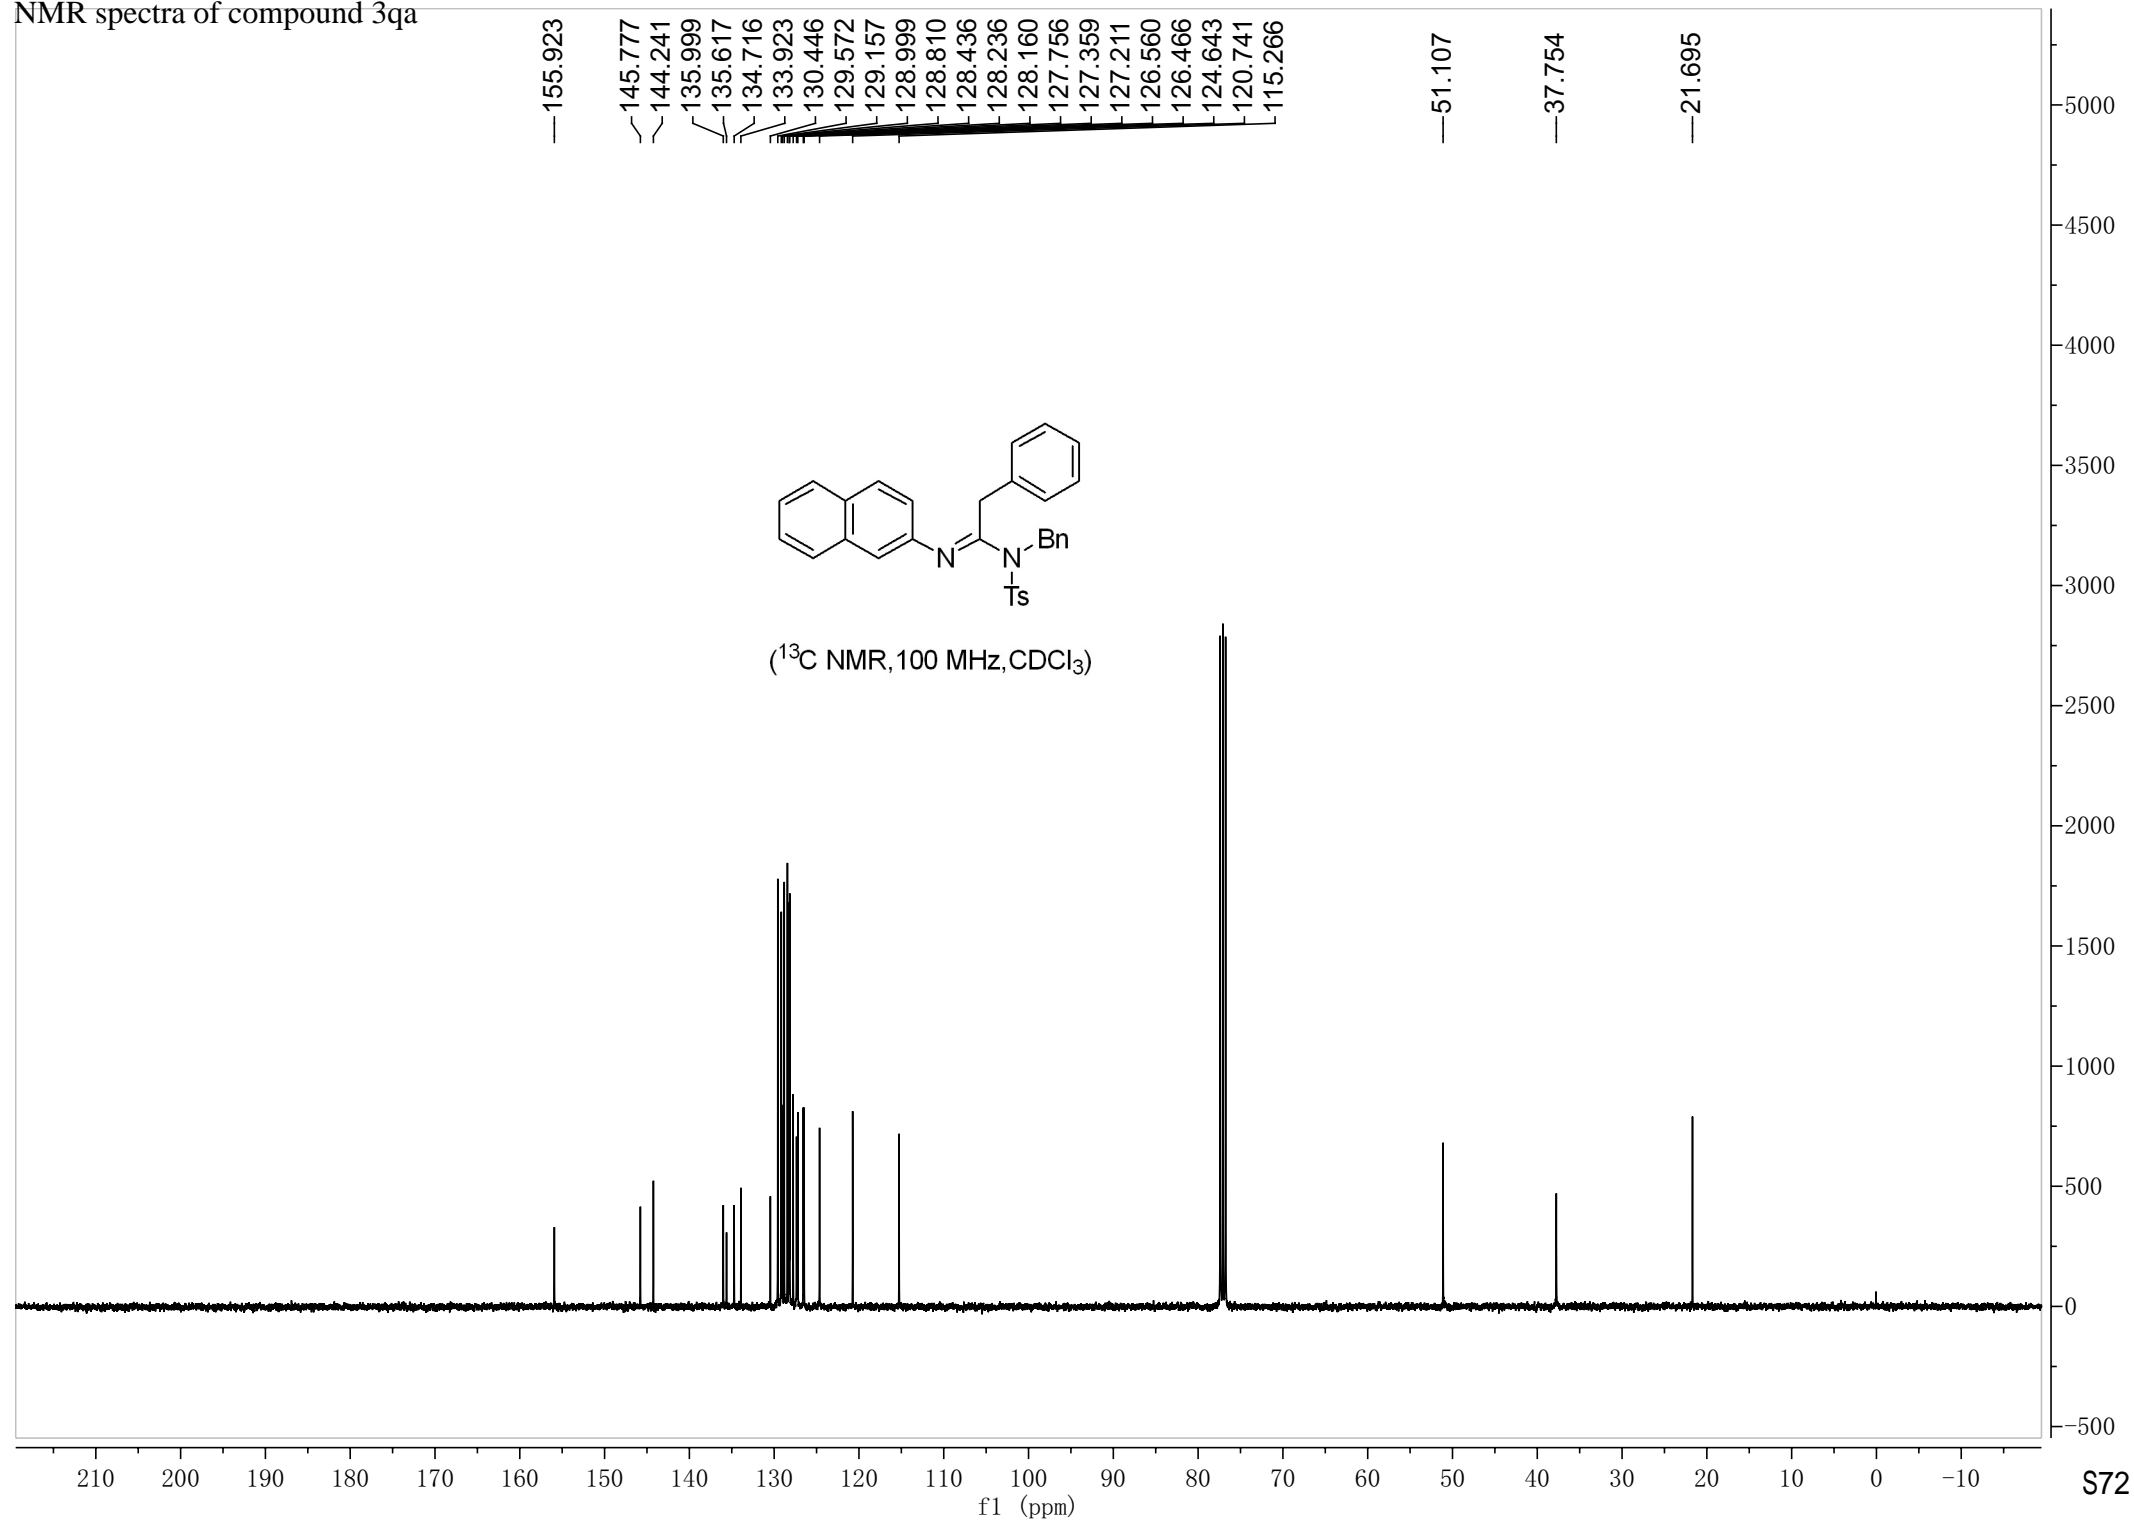

NMR spectra of compound 3gc

7.820  
7.798  
7.761  
7.740  
7.732  
7.710  
7.681  
7.660  
7.505  
7.484  
7.428  
7.426  
7.378  
7.361  
7.245  
7.242  
7.223  
7.180  
7.163  
7.159  
7.154  
7.135  
7.093  
7.077  
6.846  
6.828  
6.678  
3.847

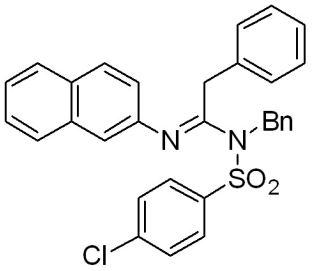

(<sup>1</sup>H NMR, 400 MHz, CDCl<sub>3</sub>)

1.93  
1.98  
0.98  
1.95  
0.98  
1.02  
8.03  
2.96  
1.00

2.01

2.00

8.5 8.0 7.5 7.0 6.5 6.0 5.5 5.0 4.5 4.0 3.5 3.0 2.5 2.0 1.5 1.0 0.5 0.0 -0.5 -1.0

f1 (ppm)

45000  
40000  
35000  
30000  
25000  
20000  
15000  
10000  
5000  
0

S73

NMR spectra of compound 3qc

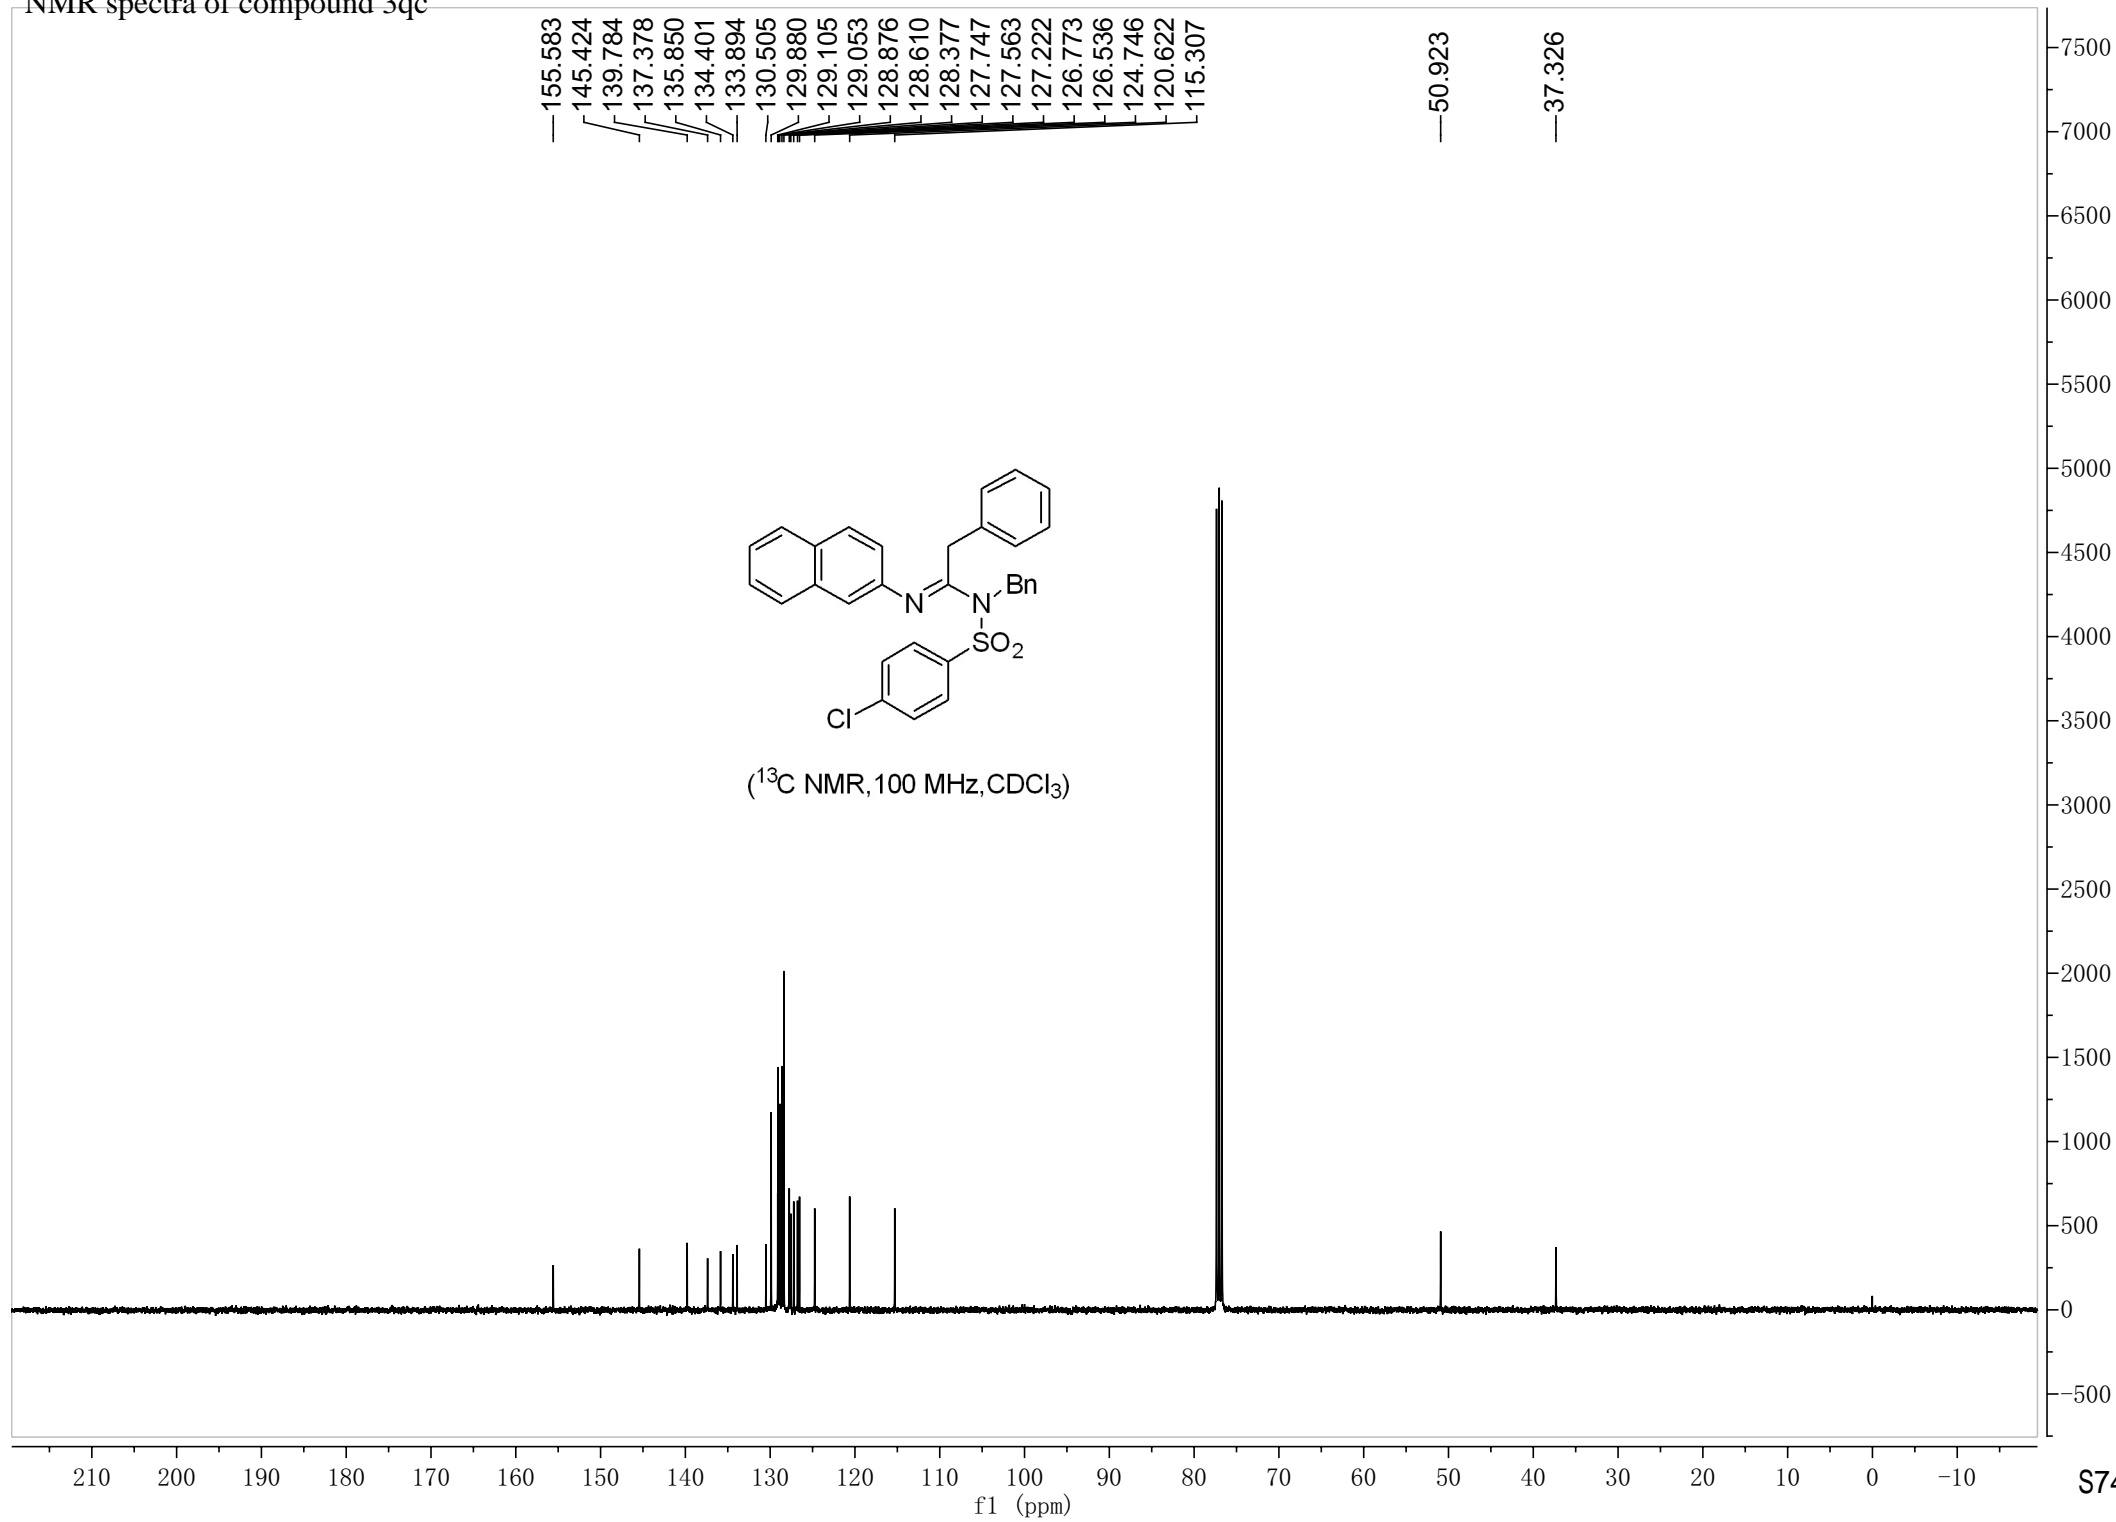

NMR spectra of compound 3qk

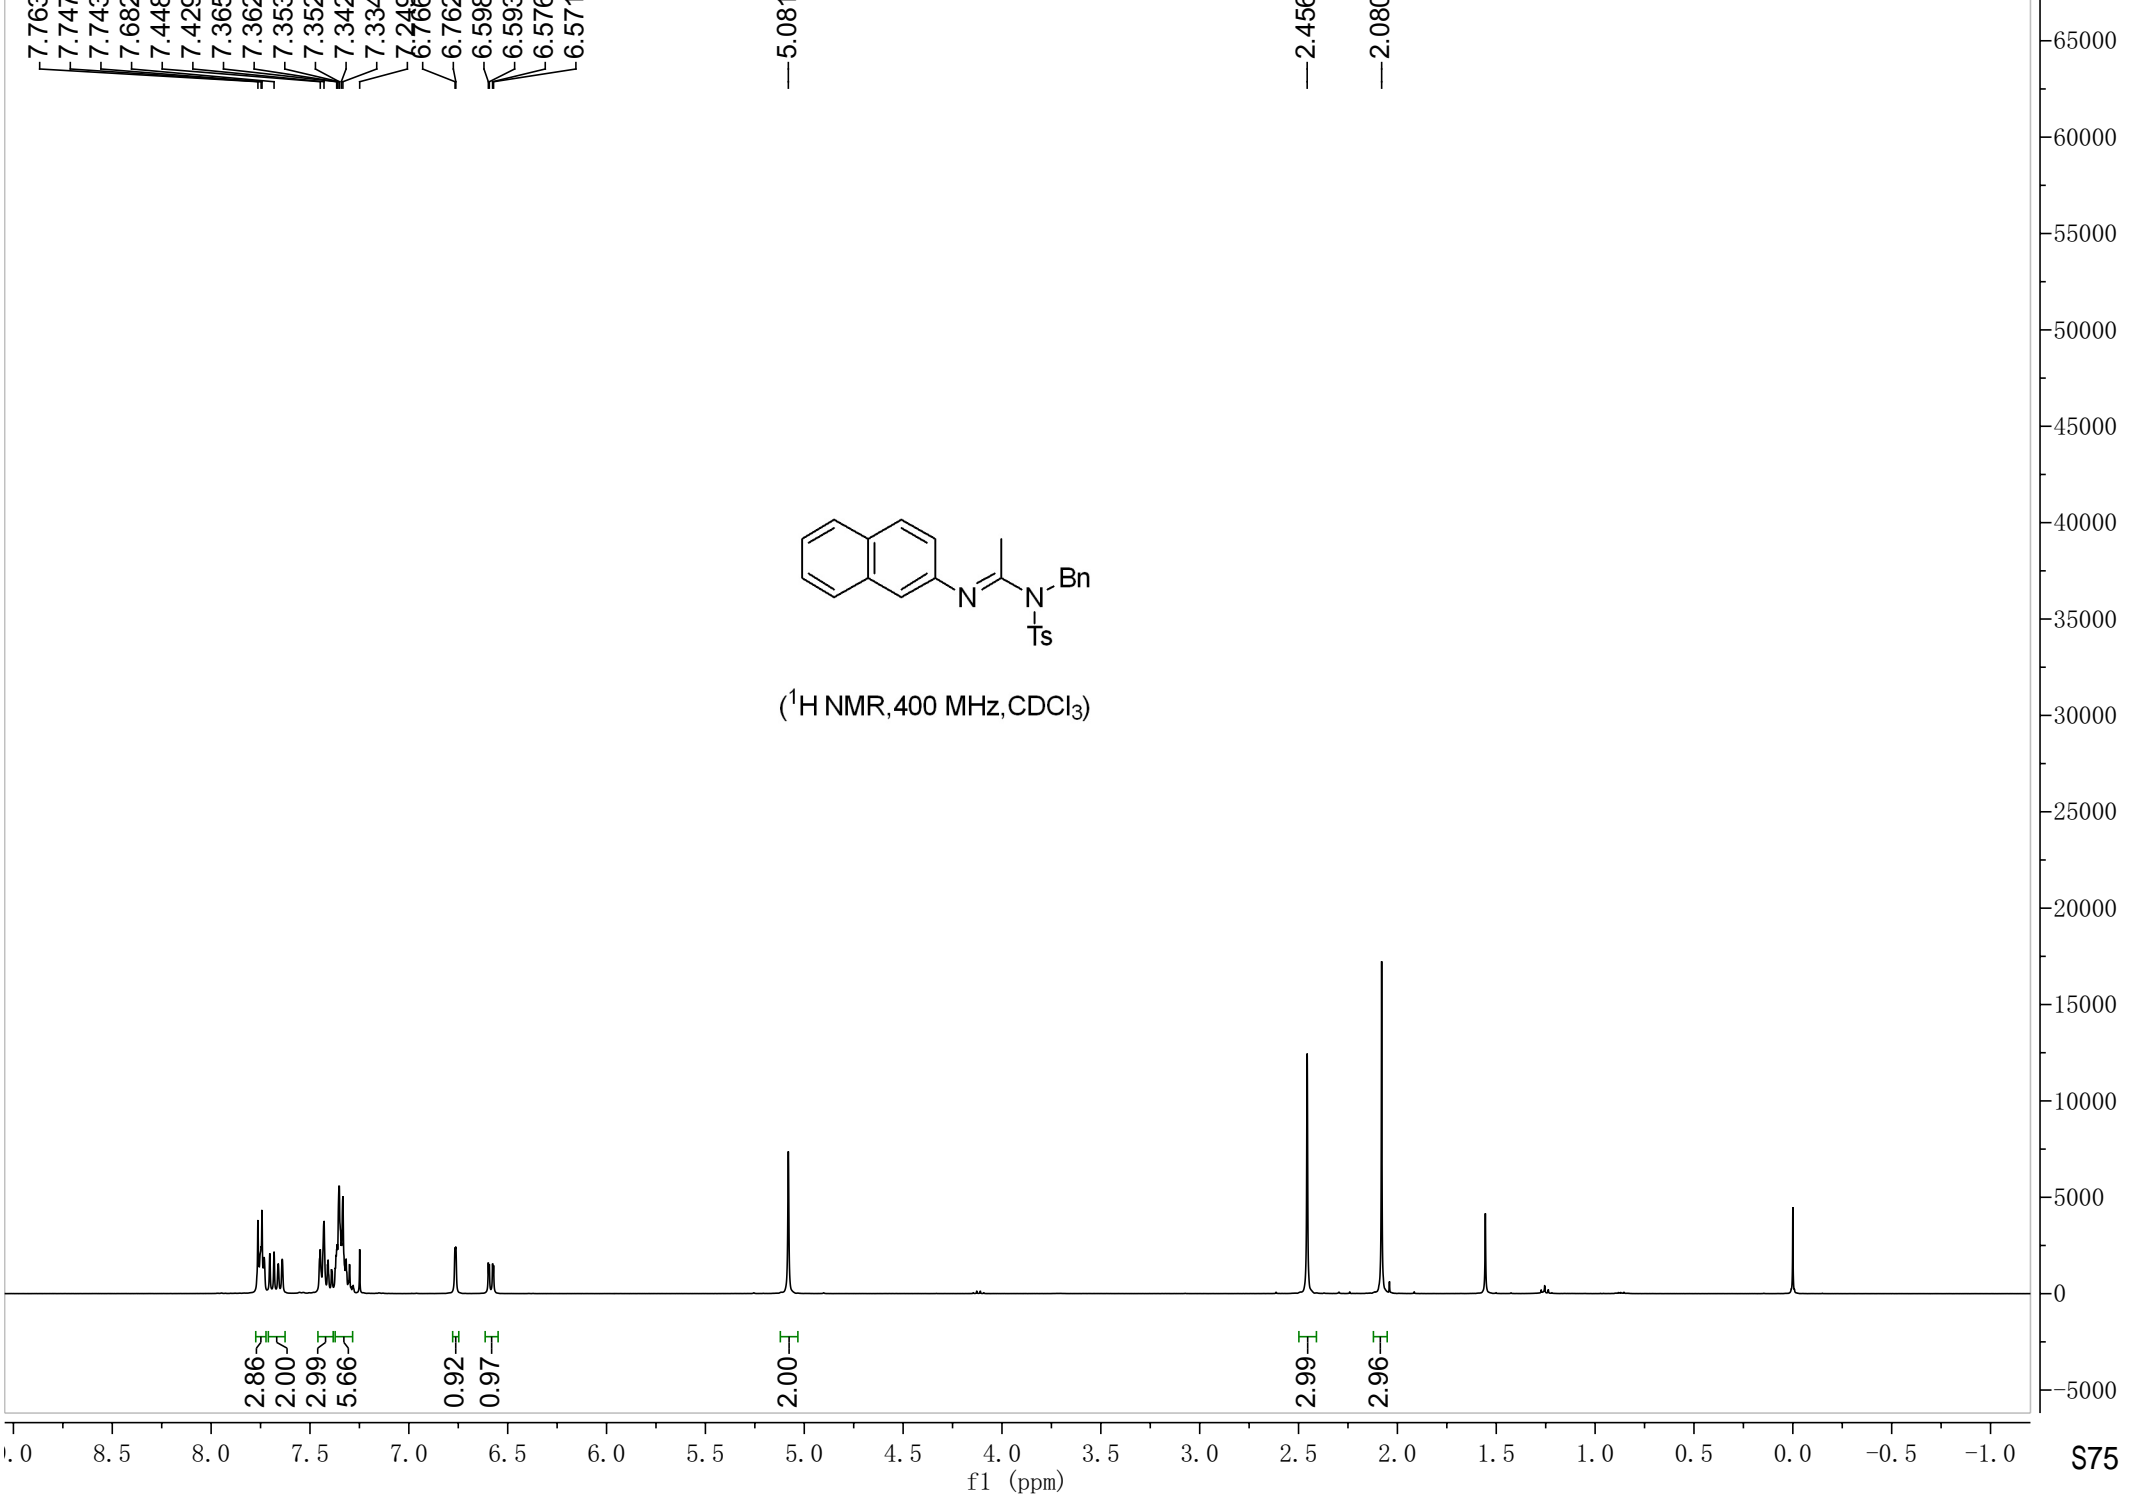

NMR spectra of compound 3qk

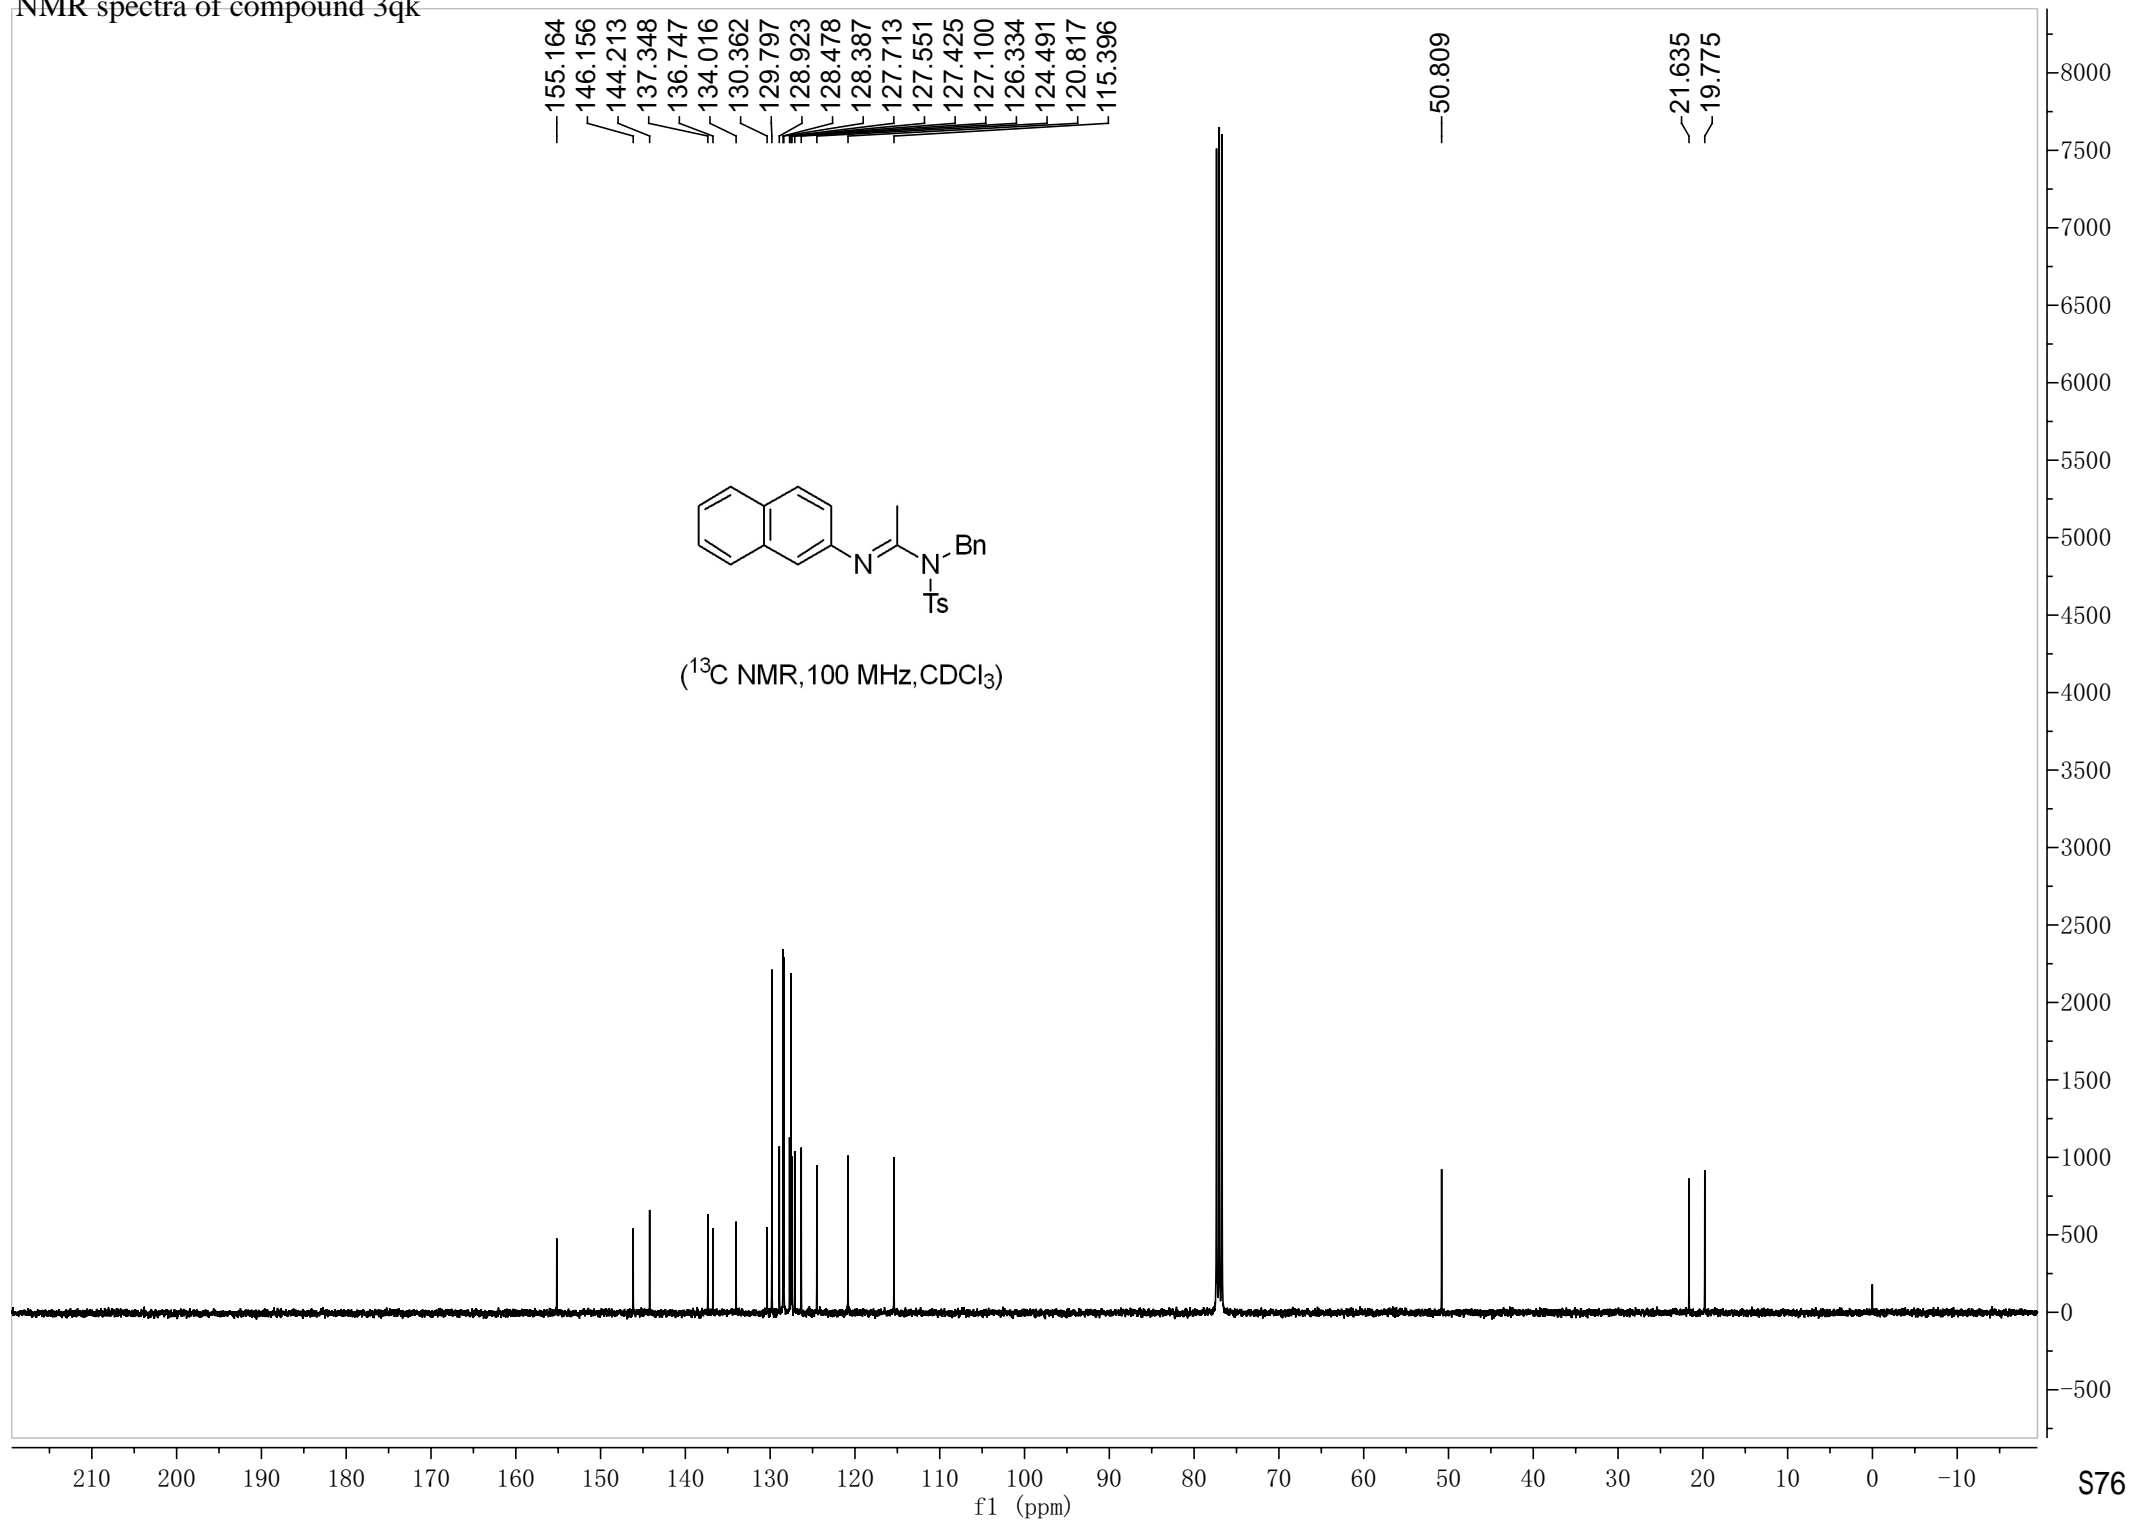



NMR spectra of compound 3ra

7.781  
7.761  
7.343  
7.193  
7.131  
7.064  
7.029  
6.904  
6.386  
6.383  
6.364

4.655  
3.951  
3.728  
2.444

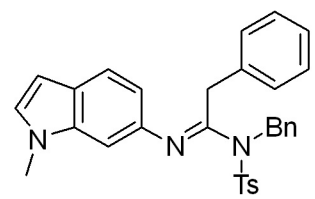

(<sup>1</sup>H NMR, 400 MHz, CDCl<sub>3</sub>)

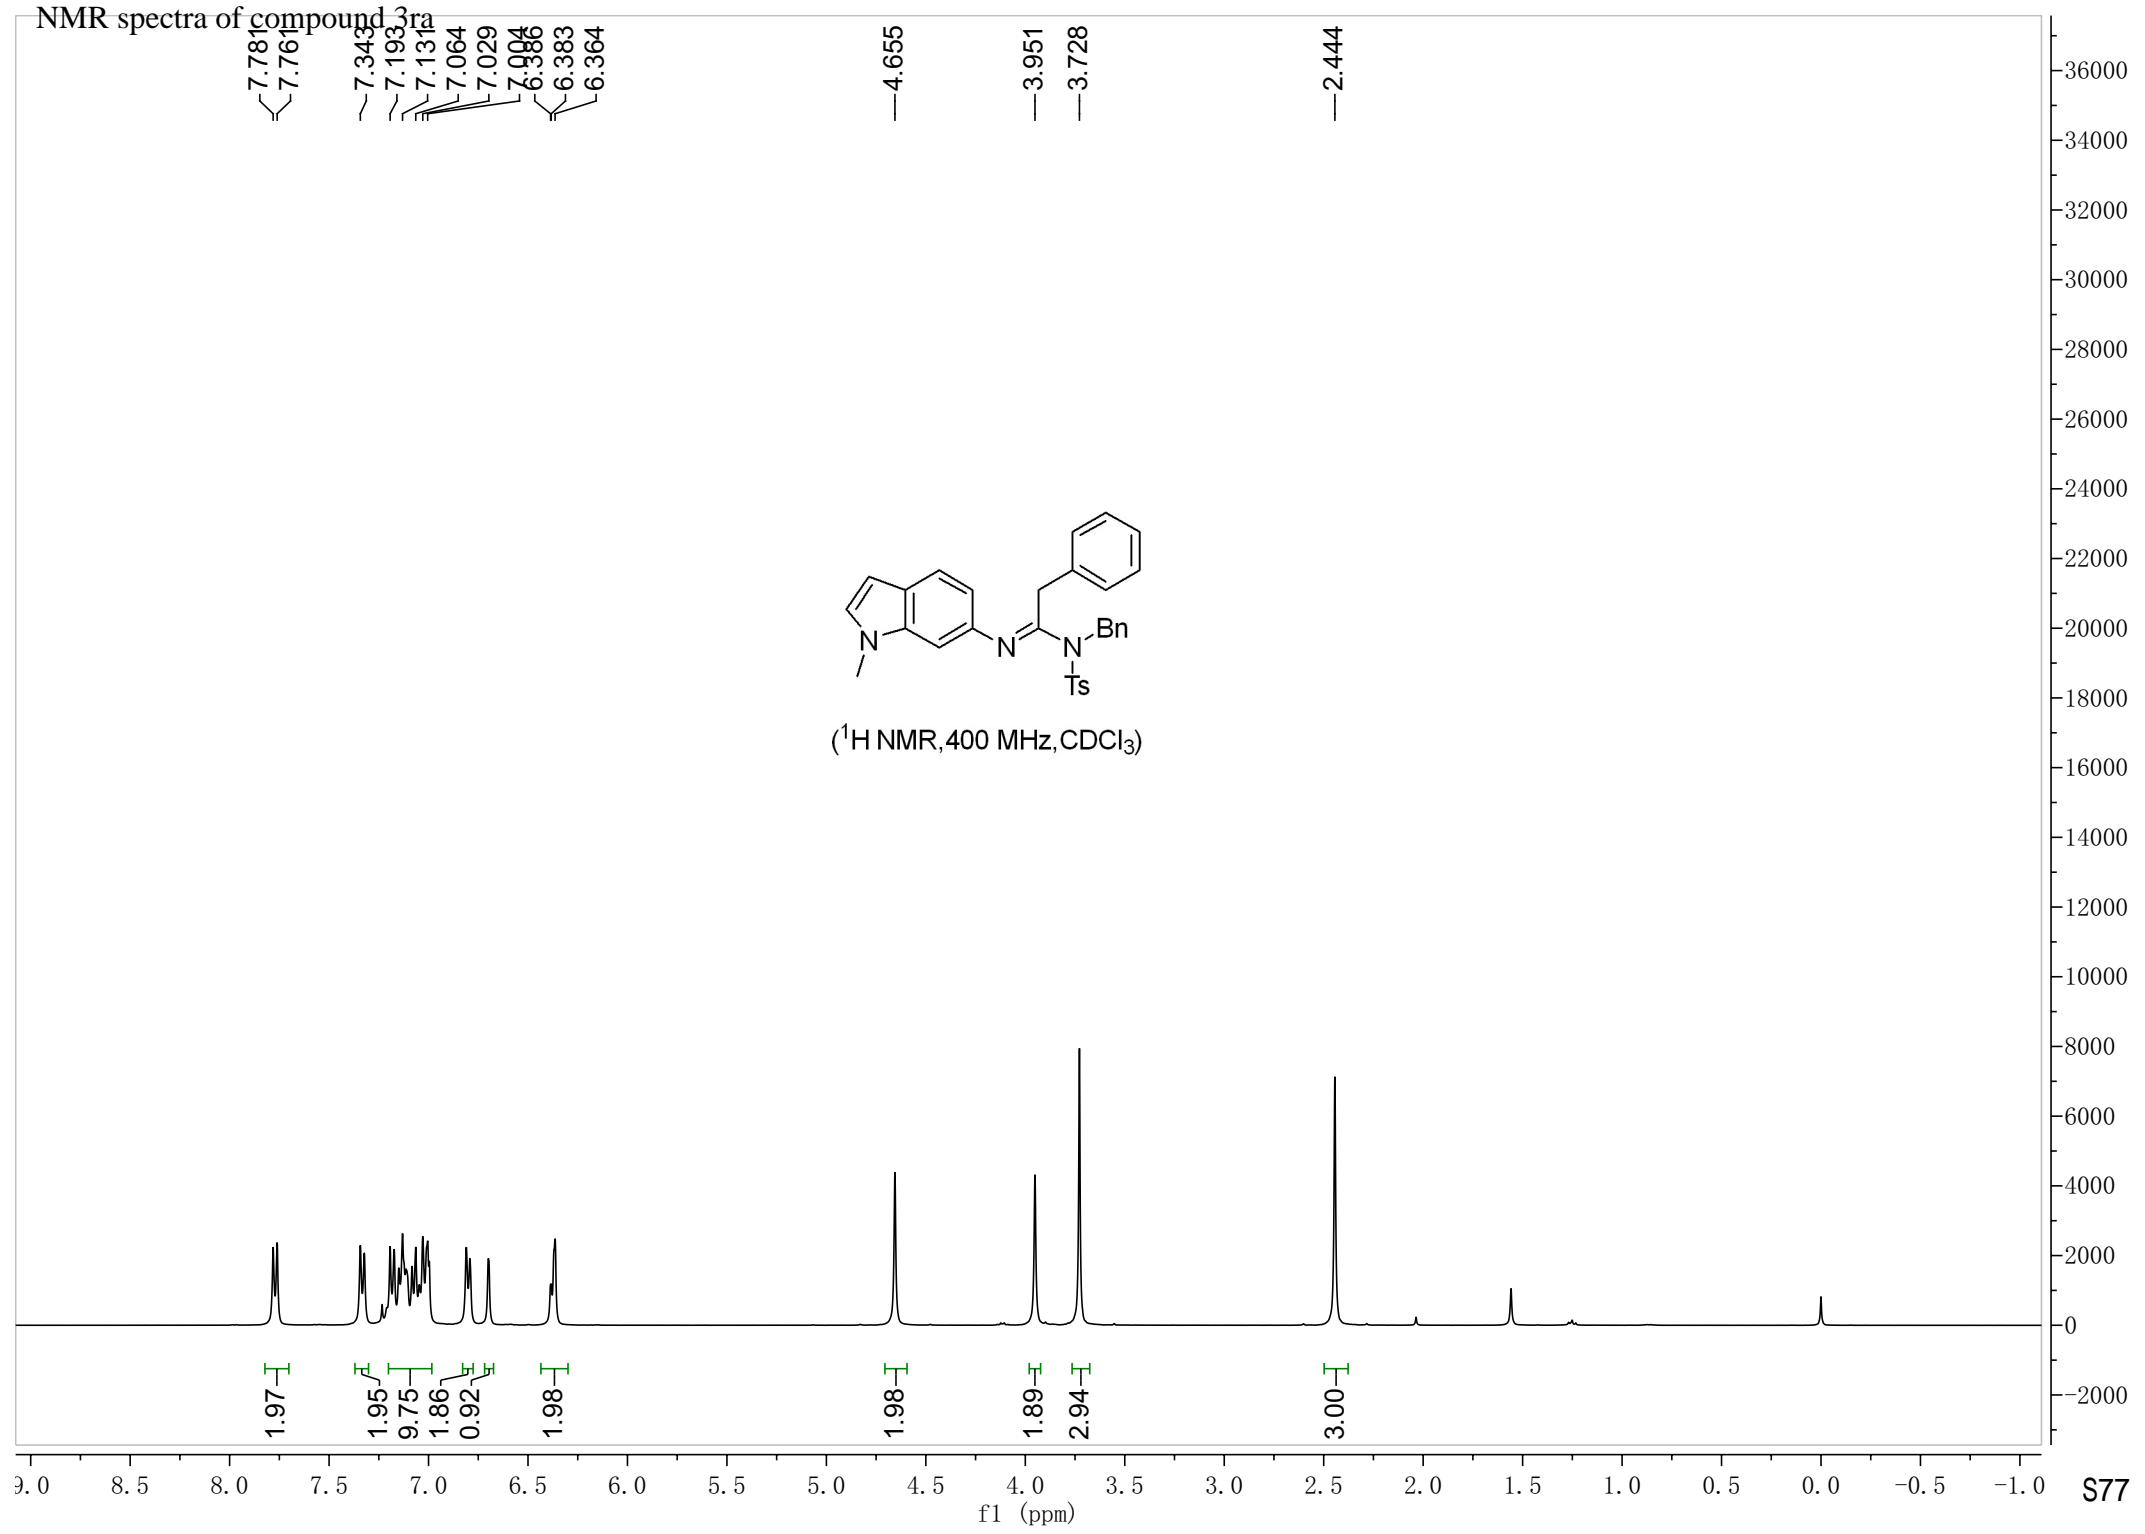

NMR spectra of compound 3ra

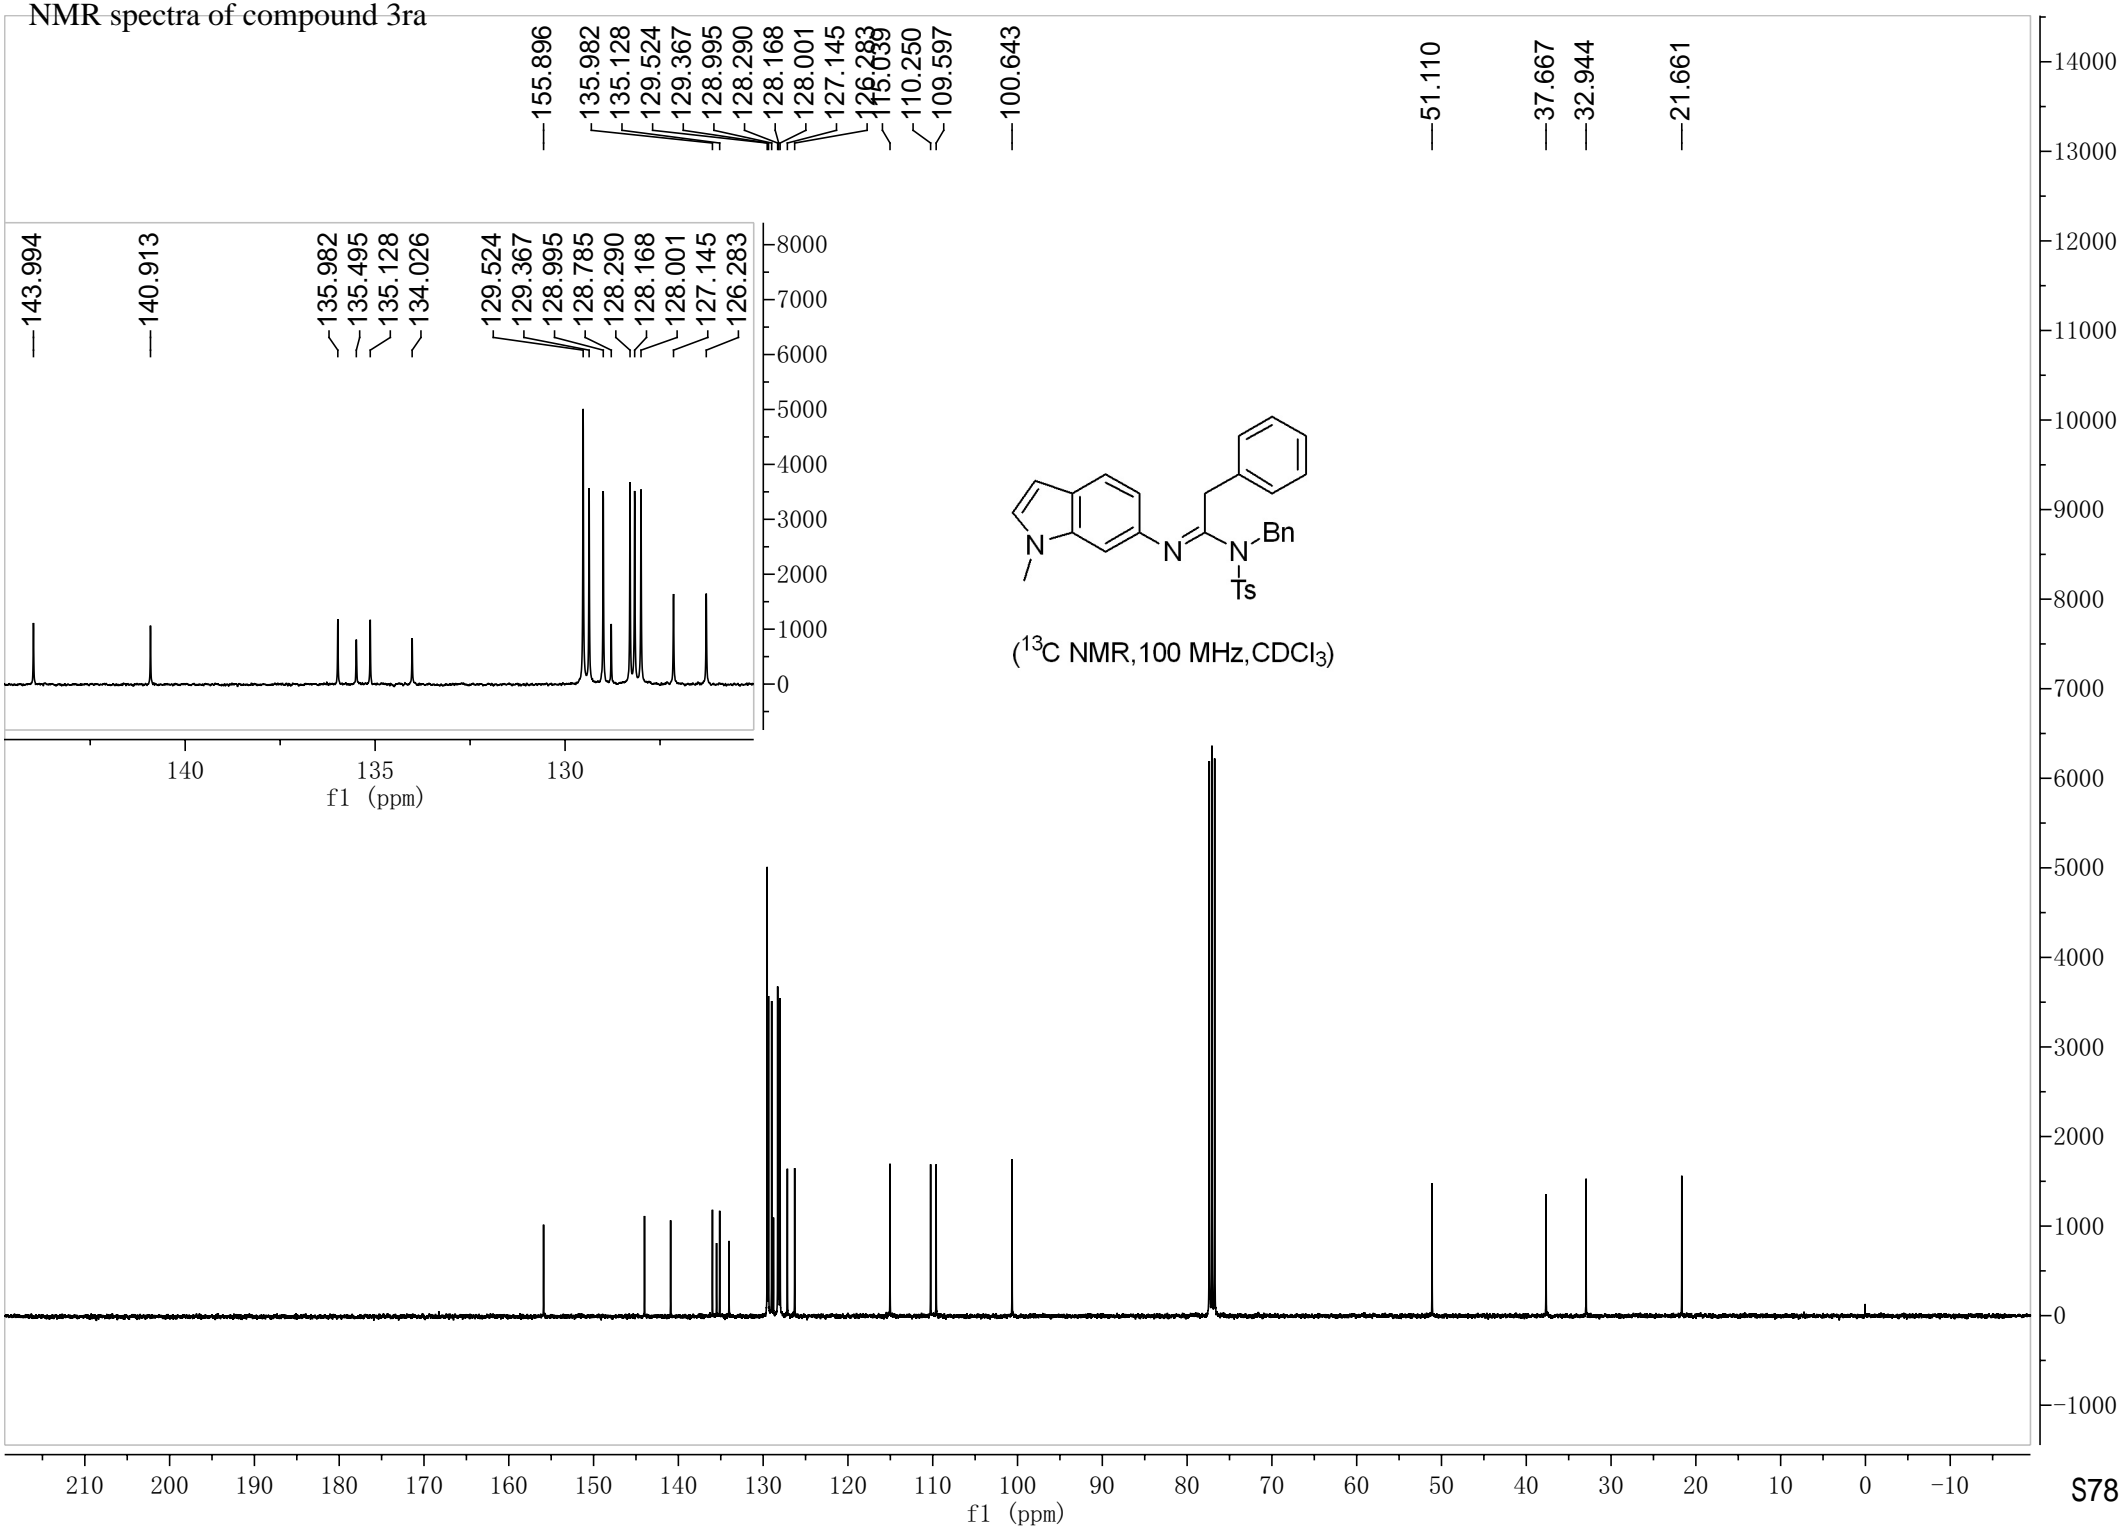

NMR spectra of compound 3rk

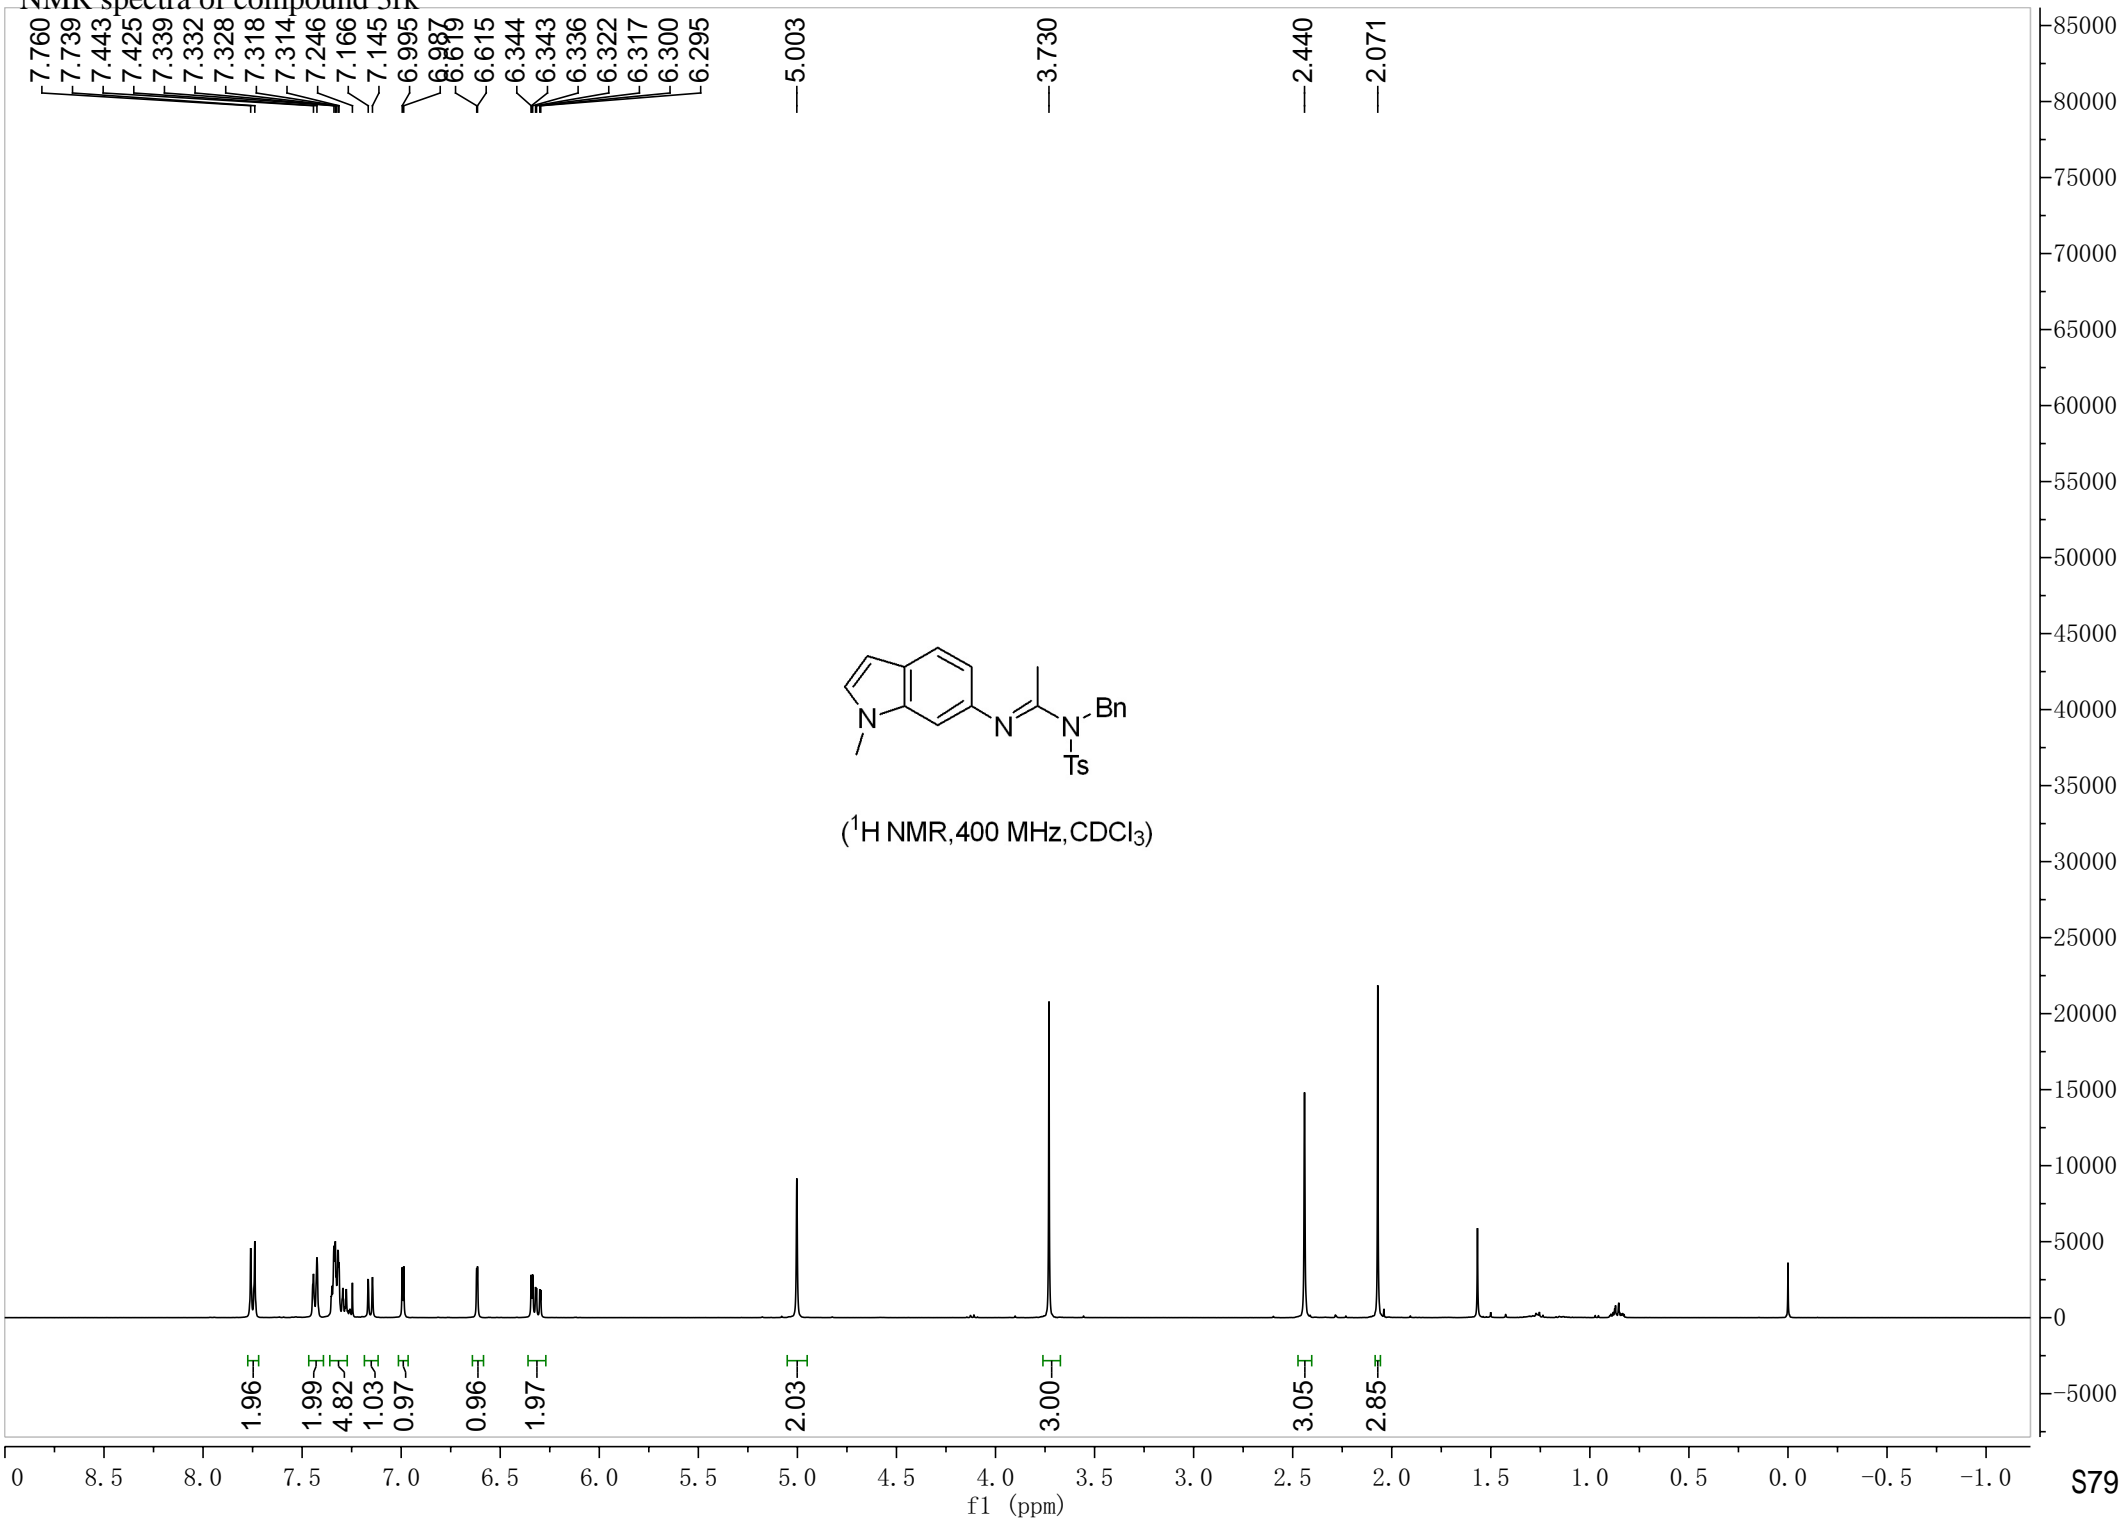

NMR spectra of compound 3rk

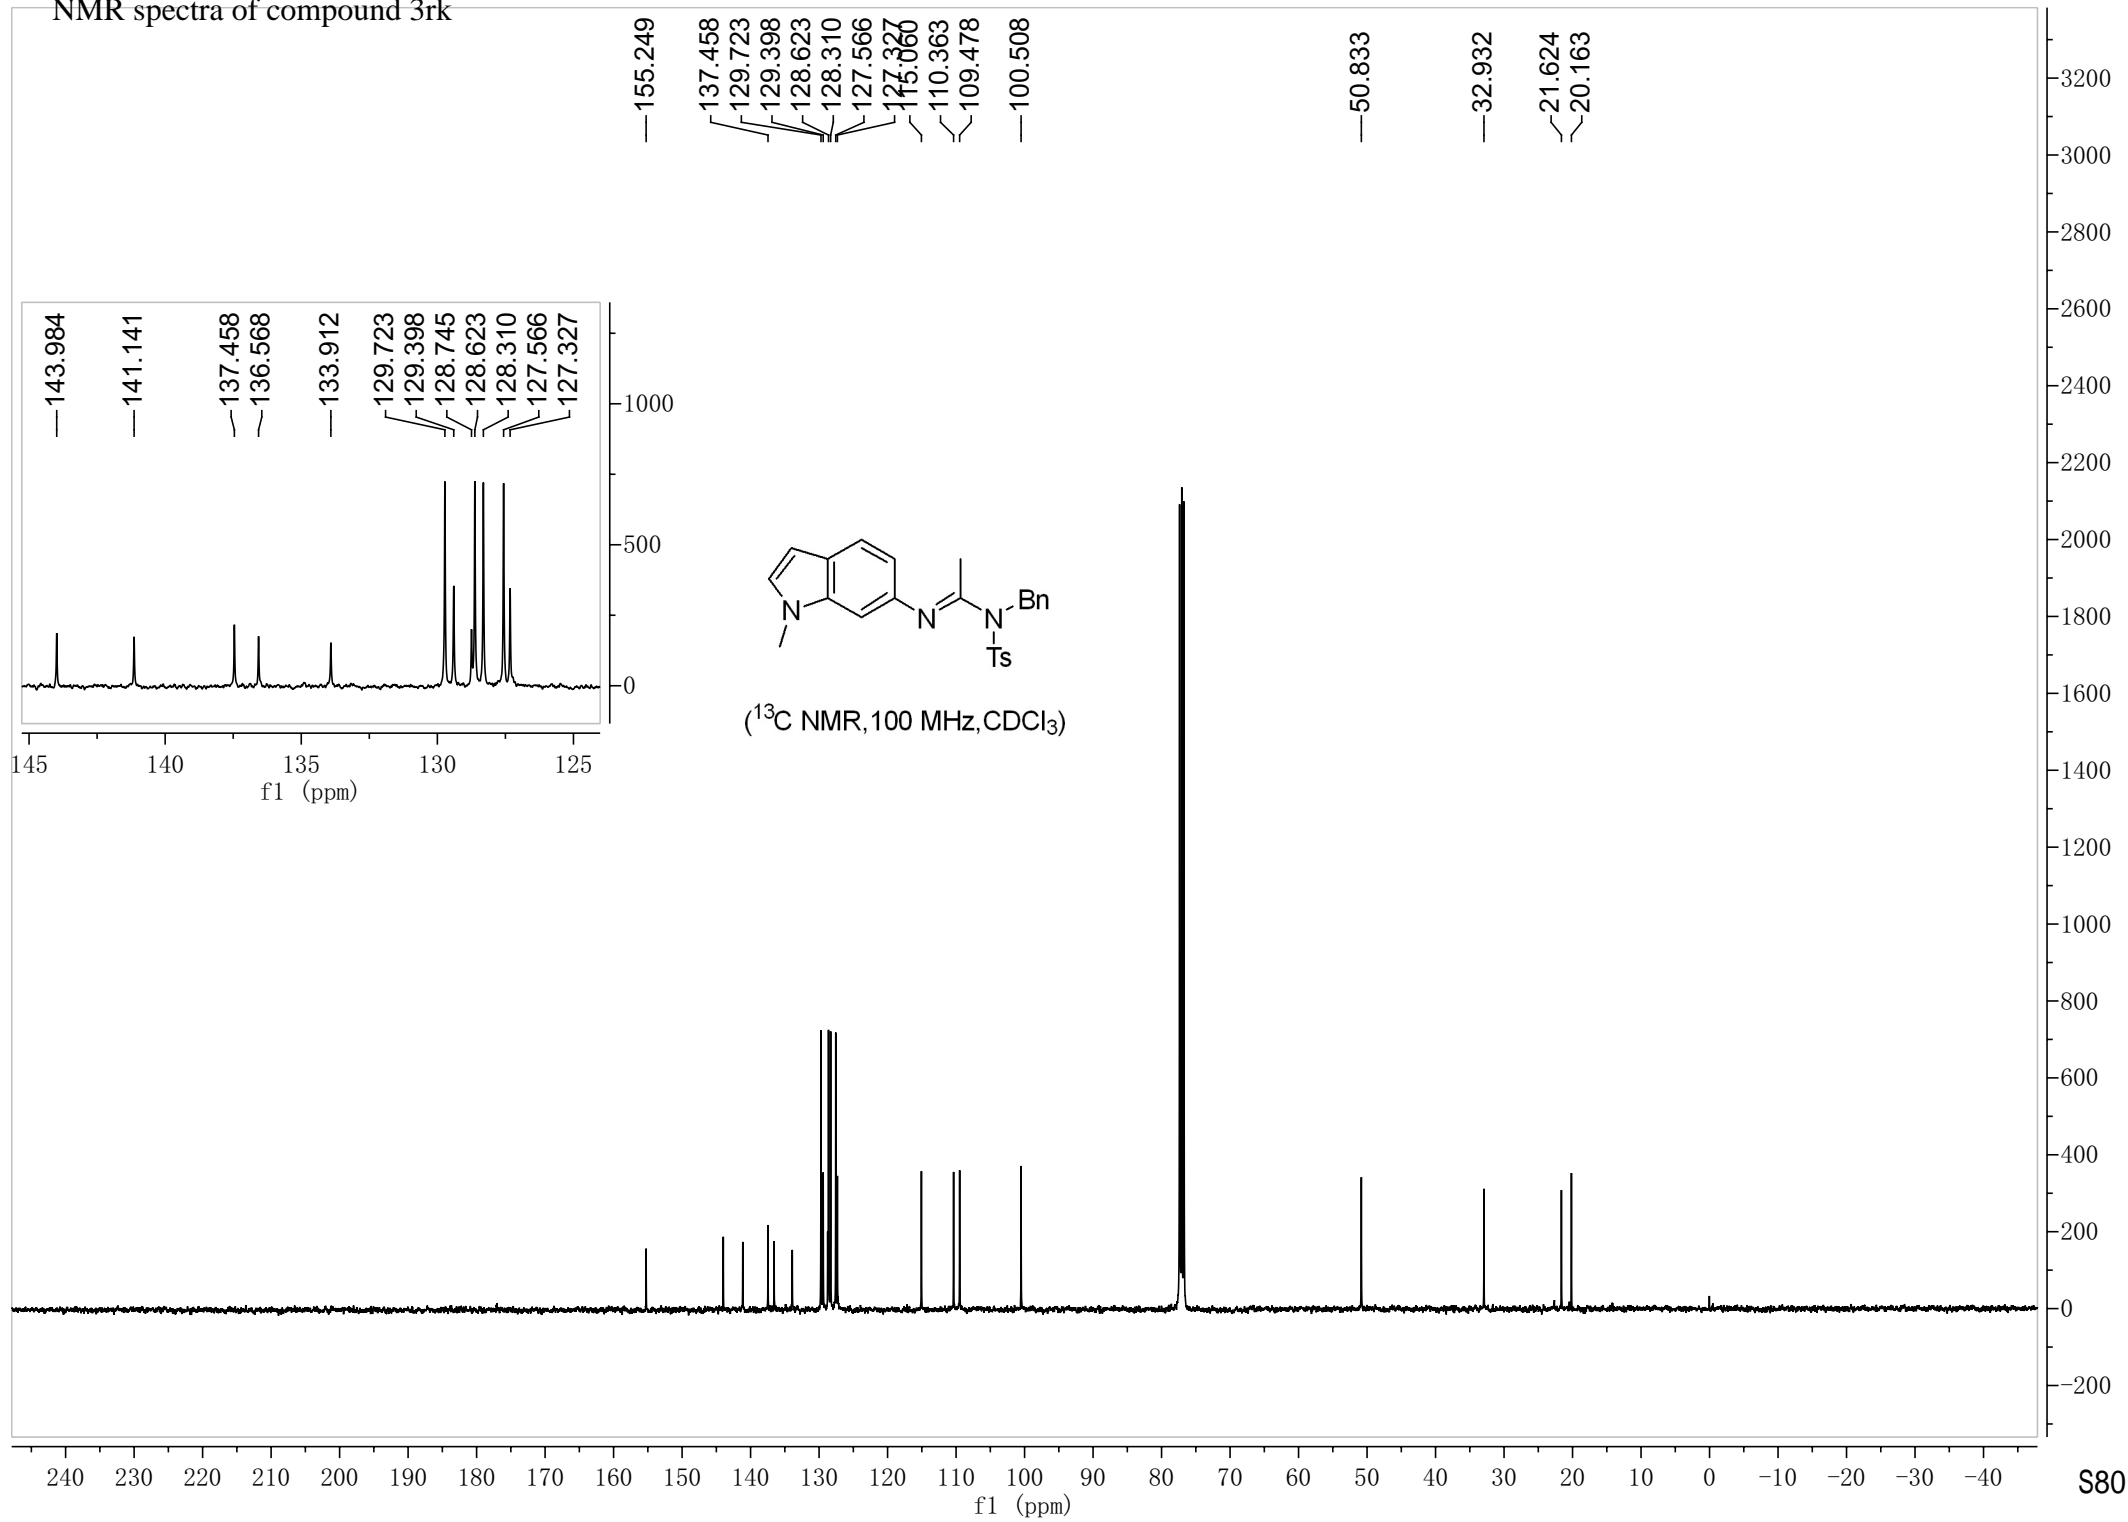

NMR spectra of compound 4

8.523  
7.636  
7.616  
7.296  
7.276  
7.218  
7.184  
7.165  
7.160  
7.149  
7.058  
7.041  
6.616  
6.599

4.509

2.450

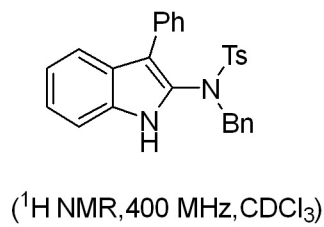

0.87

1.85

0.94

9.95

2.81

1.85

1.87

3.00

f1 (ppm)
